# Supplementary material for: An appraisal of oxoketene cycloaddition methodology for the synthesis of 2,6-dideoxysugars and fluorinated 2,6-dideoxysugars
Source: Royal Society of Chemistry journal article supplement (doi:10.1039/b817672h), 2009-01-01

# An Appraisal of Oxoketene Cycloaddition Methodology for the Synthesis of 2,6-Dideoxysugars and Fluorinated 2,6-Dideoxysugars

Christophe Audouard,<sup>a</sup> Kim Bettaney (née Middleton),<sup>a</sup> Châu T. Doan,<sup>b</sup> Peter J. Jervis,<sup>a</sup> Jonathan M. Percy,<sup>\*b</sup> Giuseppe Rinaudo<sup>b</sup> and Kuldip Singh<sup>a</sup>

<sup>a</sup>Department of Chemistry, University of Leicester, University Road, Leicester LE1 7RH, UK

<sup>b</sup>WestCHEM Department of Pure and Applied Chemistry, Thomas Graham Building, 295 Cathedral Street, Glasgow G1 1XL, UK, Fax: +44 141 4822; Tel: +44 141 548 4398; E-mail: jonathan.percy@strath.ac.uk

## Table of contents

|                                                                                                                                                                                                                                                                                                                                                                                                                                                                                                                    |        |
|--------------------------------------------------------------------------------------------------------------------------------------------------------------------------------------------------------------------------------------------------------------------------------------------------------------------------------------------------------------------------------------------------------------------------------------------------------------------------------------------------------------------|--------|
| General experimental                                                                                                                                                                                                                                                                                                                                                                                                                                                                                               | 2      |
| Additional experimental procedures (preparation of compounds <b>18</b> , <b>19</b> , <b>21</b> , <b>22</b> , <b>24</b> , <b>25</b> , <b>33-40</b> )                                                                                                                                                                                                                                                                                                                                                                | 3-8    |
| Energies, Cartesian coordinates, imaginary frequencies (where appropriate) and thermal corrections for:<br><b>3</b> , <b>42a</b> , <b>4</b> , acetone, <b>43a</b> , <b>44a</b> , methyl vinyl ether, <b>5<sub>eq</sub></b> , <b>5<sub>ax</sub></b> , <b>46a</b> , <b>45a</b> , <b>47a</b> , <b>48a</b> , <b>8</b> , <b>42b</b> , <b>28</b> , <b>43b</b> , <b>44b</b> , <b>29<sub>eq</sub></b> (methyl pyranoside), <b>29<sub>ax</sub></b> (methyl pyranoside), <b>46b</b> , <b>45b</b> , <b>47b</b> , <b>48b</b> . | 9-48   |
| Characterisation spectra for <b>1</b> , <b>6</b> , <b>8</b> , <b>11</b> , <b>17</b> , <b>19</b> , <b>22</b> , <b>27</b> , <b>29</b> , <b>30a</b> and <b>30b</b> , <b>31</b> , <b>33</b> , <b>35</b> , <b>40</b> and <b>41</b>                                                                                                                                                                                                                                                                                      | 49-124 |

NMR spectra were recorded on a Bruker ARX 250 ( $^1\text{H}$ , 250.13 MHz;  $^{13}\text{C}$ , 62.90 MHz;  $^{19}\text{F}$ , 235.36 MHz) spectrometer, a Bruker DPX 300 ( $^1\text{H}$ , 300.13 MHz;  $^{13}\text{C}$ , 75.47 MHz;  $^{19}\text{F}$ , 282.40 MHz, COSY, HMQC, HMBC) spectrometer or a Bruker DRX 400 ( $^1\text{H}$ , 400.13 MHz;  $^{13}\text{C}$ , 100.62 MHz;  $^{19}\text{F}$ , 376.45 MHz, COSY, HMQC, HMBC, NOESY) spectrometer. Chemical shifts for  $^1\text{H}$  and  $^{13}\text{C}$  NMR spectra were recorded using deuterated solvent as the lock and residual solvent as the internal standard.  $^{19}\text{F}$  NMR spectra were referenced to  $\text{CCl}_3\text{F}$  as the external standard. Electron Impact (EI) mass spectra were recorded on Kratos Concept 1H mass spectrometer. Chemical Ionization (CI) mass spectra were recorded on a Kratos Concept 1H mass spectrometer using ammonia as the reagent gas. Fast Atom Bombardment (FAB) mass spectra were recorded on a Kratos Concept 1H mass spectrometer using xenon and *m*-nitrobenzyl alcohol as the matrix. Electrospray (ES) mass spectra were recorded on a Micromass Quattro LC mass spectrometer. High Resolution Mass Spectrometry (HRMS) was measured on a Kratos Concept 1H mass spectrometer using peak matching to stable reference peaks, depending on the technique used (Leicester). Other mass spectra were obtained from the EPSRC's National Mass Spectrometry Service Centre, University of Wales Swansea.

Flash column chromatography was performed using silica gel (Fluorochem, Silica gel 60, 40-63 $\mu$ ) and HPFC Biotage Horizon system with Biotage silica prepacked Flash+ purification cartridges and Samplet sample-loading cartridges. Column fractions were collected and monitored by Thin Layer Chromatography (TLC) carried out on precoated aluminium backed silica gel plates supplied by E. Merck, A.G. Darmstadt, Germany (Silica gel 60 F<sub>254</sub>, thickness 0.2 mm) or on precoated glass plates supplied by Merck (Silica gel 60 F<sub>254</sub>). The compounds were visualized using UV light ( $\lambda = 254$  nm), potassium permanganate, *p*-anisaldehyde, 2,4-dinitrophenylhydrazine or phosphomolybdic acid (PMA) stains. Gas Chromatograms were recorded on a Perkin Elmer Autosystem Gas Chromatograph linked to a Perkin Elmer Turbomass mass spectrometer. The chromatograph was fitted with a PE5 MS (5 % phenyl, 95 % dimethylpolysiloxane phase column (30 m)); experiments were carried out between 45 to 250 °C with a 10 °C min<sup>-1</sup> ramp. Microwave experiments were carried in a CEM Discover instrument (variable power, max. 300W). Infra-red (IR) spectra were obtained on a Perkin Elmer 1600 series FT-IR spectrometer from solution samples in dry  $\text{CH}_2\text{Cl}_2$  (DCM) in a NaCl cell, or as neat samples in a Perkin Elmer SpectrumOne FT-IR spectrometer. X-Ray reflections were collected on a Bruker SMART APEX 4K CCD diffractometer ( $R_{\text{int}} = 0.0202$ ) using Mo-K $\alpha$  radiation ( $\lambda = 0.71073$  Å). Refinement was carried out using SHELXL-97. Light petroleum refers to the fraction boiling between 40-60 °C. Tetrahydrofuran (THF) was dried by refluxing with benzophenone over sodium wire under an atmosphere of nitrogen, and was distilled and collected by syringe as required. Dichloromethane, diethyl ether, toluene and acetonitrile were dried by refluxing with calcium hydride, they were then distilled and collected by dry syringe as required, or from Pure-Solv Solvent Purification Systems from Innovative Technology, Inc.. Dry DMF was used supplied by Aldrich. Acetone was used as reagent grade. *n*-Butyllithium was titrated immediately before use according to the method described by Duhamel *et al.* using 4-phenylbenzylidene benzylamine as the indicator.

(L. Duhamel and J. C. Plaquevent, *J. Organometal. Chem.*, 1993, **448**, 1-3.)

## Additional experimental procedures

### ***n*-butyl-3,4-(*O*-dibenzyl)-2,6-dideoxy- $\beta$ -DL-arabino-hexapyranoside **18****

NaH (62 mg, 60% suspension in oil, 1.53 mmol) was added slowly at 0°C to a solution of **17** (104 mg, 0.51 mmol) in THF (20 mL). The reaction mixture was stirred for one hour at this temperature. BnBr (262 mg, 1.53 mmol) and TBAI (40 mg, 0.1 mmol) were added to the mixture at 0 °C and the reaction was allowed to warm to room temperature and stirred for 2 days. Water (10 mL) was added slowly to quench the reaction. The mixture was then extracted with ethyl acetate (3 x 25 mL), and the combined organic extracts were washed with brine (50 mL), dried (MgSO<sub>4</sub>) and concentrated *in vacuo* to afford a yellow oil which was purified by flash chromatography on silica gel to deliver 3,4-(*O*-dibenzyl pyranoside **18** as a colorless oil (184 mg, 94%); R<sub>f</sub> (20% ethyl acetate in light petroleum) 0.71;  $\nu_{\max}$  (film)/cm<sup>-1</sup>: 2930w, 1454w, 1365w, 1094s, 1072s, 988m, 733m, 696m;  $\delta_{\text{H}}$  (CDCl<sub>3</sub>, 300MHz); 7.23-7.12 (10 H, m), 4.86 (1 H, part of an AB system, <sup>2</sup>*J* 10.9), 4.58 (1 H, part of an AB system, <sup>2</sup>*J* 11.7), 4.56 (1 H, part of an AB system, <sup>2</sup>*J* 10.9), 4.50 (1 H, part of an AB system, <sup>2</sup>*J* 11.7), 4.31 (1 H, dd, *J* 8.1, 1.8), 3.78 (1 H, dt, <sup>2</sup>*J* 9.3, *J* 6.6), 3.53 (1 H, ddd, *J* 13.8, 8.7, 5.1), 3.33 (1 H, dt, <sup>2</sup>*J* 9.3, 6.9), 3.24 (1 H, dq, *J* 9.2, 6.0), 3.05 (1 H, m incl. app. t, *J* 9.1), 2.25 (1 H, ddd, <sup>2</sup>*J* 12.6, 5.1, 1.8), 1.59-1.44 (3 H, m), 1.32-1.23 (2 H, m), 1.24 (3 H, d, *J* 6.0), 0.83 (3 H, t, *J* 7.2);  $\delta_{\text{C}}$  (CDCl<sub>3</sub>, 75MHz) 138.6, 138.5, 128.5, 128.4, 128.1, 127.75, 127.70, 99.6, 83.8, 79.4, 75.3, 71.4, 69.2, 37.1, 31.8, 19.3, 18.2, 13.9; HRMS (EI<sup>+</sup>, M<sup>+</sup>) Found: 384.23005, Calc. for C<sub>24</sub>H<sub>32</sub>O<sub>4</sub> 384.23006; *m/z* (EI): 384 (M<sup>+</sup>, 2%), 310 (28), 193 (5), 84 (100).

### **3,4-(*O*-dibenzyl)-2,6-dideoxy- $\beta$ -DL-arabino-hexapyranoside **19****

From pyranoside **18** (77 mg, 0.2 mmol) in THF (2 mL) and HCl (2 mL of a 1N solution) in the microwave (80 °C, 300W, 2 hours). The work-up and isolation were performed as for **17** and the crude product **19** was purified on silica gel to afford 3,4-(*O*-dibenzyl)-pyranoside **19** (36 mg, 55%) as a colourless oil, and as a 59:41 mixture of  $\alpha$ - and  $\beta$ -anomers; R<sub>f</sub> (20% ethyl acetate in light petroleum) 0.11; Mp 68°C;  $\nu_{\max}$  (film)/cm<sup>-1</sup>: 3355m, 2842w, 1496w, 1452m, 1114s, 1093s, 1071s, 1003s, 981m, 728s, 691s;  $\delta_{\text{H}}$  (CDCl<sub>3</sub>, 300MHz)  $\alpha$ -anomer: 7.28-7.16 (10 H), 5.22 (1 H, br. d, *J* 2.7), 4.87 (1 H, d, <sup>2</sup>*J* 11.0), 4.63-4.50 (3 H, m), 3.98-3.83 (2 H, m), 3.05 (1 H, m incl. app. t, *J* 8.9), 2.98 (1 H, br s), 2.22 (1 H, ddd, <sup>2</sup>*J* 13.2, *J* 5.1, 1.2), 1.66-1.52 (1 H, m), 1.19 (3 H, d, *J* 6.3),  $\delta_{\text{H}}$  (CDCl<sub>3</sub>, 300MHz)  $\beta$ -anomer: 7.28-7.16 (10 H, m), 4.86 (1 H, d, <sup>2</sup>*J* 10.9), 4.64 (1 H, br. d, *J* 9.6), 4.63-4.50 (3 H, m), 3.63-3.43 (1 H, m), 3.31 (1 H, dq, *J* 9.1, 6.0), 3.05 (1 H, m incl. app. t, *J* 9.1), 2.30 (1 H, ddd, <sup>2</sup>*J* 12.3, *J* 4.8, 1.8), 1.53-1.38 (1 H, m), 1.23 (3 H, d, *J* 6.0);  $\delta_{\text{C}}$  (CDCl<sub>3</sub>, 75MHz)  $\alpha$ -anomer: 138.6, 138.5, 128.45, 128.35, 128.05, 127.95, 127.75, 127.70, 91.9, 84.3, 76.9, 75.2, 71.5, 67.4, 35.8, 18.2,  $\delta_{\text{C}}$  (CDCl<sub>3</sub>, 75MHz)  $\beta$ -anomer: 138.4, 138.1, 128.55, 128.45, 128.15, 128.05, 127.6, 93.9, 83.4, 79.0, 75.3, 71.8, 71.6, 38.4, 18.2; HRMS (EI<sup>+</sup>, M<sup>+</sup>) Found: 328.16740, Calc. for C<sub>20</sub>H<sub>24</sub>O<sub>4</sub> 328.16746; *m/z* (EI): 328 (M<sup>+</sup>, 4%), 237 (47), 131 (31), 91 (100); t<sub>R</sub> (GC) 26.36 min.

### ***n*-butyl-3-(*O*-methyl)-2,6-dideoxy- $\beta$ -DL-arabino-hexapyranoside **21****

NaH (2.8 g, 60% suspension in oil, 70.0 mmol) was added slowly at 0°C to a solution of crude alcohol **14** (2.53 g, 13.6 mmol, see procedure for **15**) in THF (100 mL). The reaction mixture was stirred for 30 minutes at 0°C. MeI (10.0 g, 70 mmol) was added dropwise to the mixture at 0°C and the reaction was stirred at room temperature for one hour. Water (50 mL) was added slowly at 0 °C to quench the reaction. The mixture was then extracted with ethyl acetate (3 x 100 mL), and the combined organic extracts were washed with brine (100 mL), dried (MgSO<sub>4</sub>) and concentrated *in vacuo* to afford methyl ether **20** as an unstable dark yellow oil which was taken on without purification.

Crude **20** (13.6 mmol) in THF (100 mL) underwent hydroboration/oxidation/hydrolysis as for **14** with BH<sub>3</sub>.SMe<sub>2</sub> (15.0 mL of a 2.0M solution in THF, 30.0 mmol), and solid NaBO<sub>3</sub>.H<sub>2</sub>O (10.0 g, 65.0 mmol). The reaction, work-up and product isolation were carried out as for **15**. The residue was purified by flash chromatography to deliver 3-*O*-methylpyranoside **21** as a yellow oil (170 mg, 6% over 3 steps); R<sub>f</sub> (50% ethyl acetate in light petroleum) 0.38;  $\nu_{\max}$  (film)/cm<sup>-1</sup>: 3446m, 2959m, 2934m, 2872m, 1374m, 1167m, 1102m, 1067s, 988m, 903m;  $\delta_{\text{H}}$  (CDCl<sub>3</sub>, 300MHz); 4.38 (1 H, dd, *J* 9.9, 2.1), 3.80 (1 H, dt, <sup>2</sup>*J* 9.6, *J* 6.6), 3.37 (1 H, dt, <sup>2</sup>*J* 9.6, *J* 6.9), 3.32 (3 H, s), 3.25-3.03 (3 H, m), 2.25 (1H, ddd, <sup>2</sup>*J* 12.3, 4.5, 2.1), 1.56-1.46 (2 H, m), 1.42-1.18 (3 H, m), 1.26 (3 H, d, *J* 6.0), 0.85 (3 H, t, *J* 7.5);  $\delta_{\text{C}}$  (CDCl<sub>3</sub>, 75MHz) 99.6, 80.4, 75.1, 71.6, 69.1, 56.1, 35.2, 31.6, 19.1, 17.8, 13.8; HRMS (EI<sup>+</sup>, M<sup>+</sup>) Found: 218.15186, Calc. for C<sub>11</sub>H<sub>22</sub>O<sub>4</sub> 218.15181; *m/z* (EI): 217 (M-H<sup>+</sup>, 5%), 174 (15), 145 (27), 118 (71), 101 (89), 87 (30), 74 (100); t<sub>R</sub> (GC) 13.92 min.

### **3-(*O*-methyl)-2,6-dideoxy- $\beta$ -DL-arabino-hexapyranoside **22** (Oleandrose)**

From pyranoside **21** (277 mg, 1.27 mmol) in THF (3 mL) and HCl (3 mL of a 1N solution) in the microwave (80°C, 300W 1 hour). The work-up and isolation were performed as for **17** and the crude product **22** (DL-oleandrose) (30 mg, 15%) was obtained as a colorless oil, as a 64:36 mixture of  $\alpha$ - and  $\beta$ -anomers; R<sub>f</sub> (50% ethyl acetate in light petroleum) 0.08;  $\nu_{\max}$  (film)/cm<sup>-1</sup>: 3396m, 2934w, 1075s, 1046s, 984s, 734m;  $\delta_{\text{H}}$  (CDCl<sub>3</sub>, 300MHz)  $\alpha$ -anomer: 5.30 (1 H, br. d, *J* 3.0), 3.87 (1 H, dq, *J* 9.3, 6.3), 3.52 (1 H, ddd, *J* 11.4, 9.0, 4.8), 3.34 (3 H, s), 3.15-3.05 (1 H, m), 2.24 (1 H, ddd, <sup>2</sup>*J* 12.6, *J* 4.8, 1.2), 1.43 (1 H, ddd, <sup>2</sup>*J* 12.6, *J* 11.4, 3.6), 1.22 (3 H, d, *J* 6.3),  $\delta_{\text{H}}$  (CDCl<sub>3</sub>, 300MHz)  $\beta$ -anomer: 4.76 (1 H, dd, *J* 9.6, 2.0), 3.36-3.29 (1 H, m), 3.34 (3 H, s), 3.19-3.02 (2 H, m), 2.35 (1 H, ddd, <sup>2</sup>*J* 12.0, *J* 4.2, 2.0), 1.38-1.26 (1 H, m), 1.28 (3 H, d, *J* 6.3);  $\delta_{\text{C}}$  (CDCl<sub>3</sub>, 75MHz)  $\alpha$ -anomer: 92.2, 77.9, 76.2, 67.7, 56.5, 33.9, 17.9,  $\delta_{\text{C}}$  (CDCl<sub>3</sub>, 75MHz)  $\beta$ -anomer: 94.1, 80.5, 75.3, 71.8, 56.3, 36.6, 17.9; HRMS (EI<sup>+</sup>, M<sup>+</sup>) Found: 162.08916, Calc. for C<sub>7</sub>H<sub>14</sub>O<sub>4</sub> 162.08921; *m/z* (CI): 162 (M<sup>+</sup>, 62%), 145 (100), 130 (23), 113 (22); (GC) t<sub>R</sub> (GC) 11.18 min. The NMR data were in agreement with those reported by Toshima. (K. Toshima, T. Yoshida, S. Mukaiyama and K. Tatsuta, *Carbohydr. Res.*, 1991, **222**, 173-188).

### ***n*-butyl-3-(*O*-benzyl)-2,6-dideoxy- $\beta$ -DL-arabino-hexapyranoside **24****

NaH (540 mg, 60% suspension in oil, 14.0 mmol) was added slowly at  $-78^{\circ}\text{C}$  to a solution of crude **14** (521 mg, 2.8 mmol, see procedure for **15**) in a mixture of THF (50 mL) and DMF (10 mL). The reaction mixture was stirred for 30 minutes, allowing warming from  $-78^{\circ}\text{C}$  to  $0^{\circ}\text{C}$ . BnBr (2.39 g, 14.0 mmol) was added to the mixture at  $0^{\circ}\text{C}$  and the reaction was stirred at room temperature for 2 hours. Water (30 mL) was added slowly at  $0^{\circ}\text{C}$  to quench the reaction. The mixture was extracted with ethyl acetate (3 x 50 mL), and the combined organic extracts were washed with brine (30 mL), dried ( $\text{MgSO}_4$ ) and concentrated *in vacuo* to afford benzyl ether **23** as a yellow oil which was used to the next step without any further purification.

Crude **23** (2.8 mmol) in THF (70 mL) underwent hydroboration/oxidation/hydrolysis as for **14** with  $\text{BH}_3\cdot\text{SMe}_2$  (3.0 mL of a 2.0M solution in THF, 6.0 mmol), and solid  $\text{NaBO}_3\cdot\text{H}_2\text{O}$  (2.31 g, 15.0 mmol). The reaction, work-up and product isolation were carried out as for **15**. The residue was purified by flash chromatography to deliver 3-(*O*-benzyl pyranoside **24** as a yellow oil (267 mg, 32% over 2 steps);  $R_f$  (20% ethyl acetate in light petroleum) 0.28;  $\nu_{\text{max}}$  (film)/ $\text{cm}^{-1}$ : 3454w, 2871w, 1369m, 1096m, 1068s, 988m, 697m;  $\delta_{\text{H}}$  ( $\text{CDCl}_3$ , 300MHz); 7.24-7.18 (5 H, m), 4.60 (1 H, part of an AB system,  $^2J$  11.7), 4.39 (1 H, part of an AB system,  $^2J$  11.7), 4.35 (1 H, dd,  $J$  9.9, 1.8), 3.80 (1 H, dt,  $^2J$  9.6,  $J$  6.6), 3.40-3.29 (2 H, m), 3.26-3.11 (2 H, m), 2.42 (1 H, br s), 2.26 (1 H, ddd,  $^2J$  12.3, 4.8, 1.8), 1.55-1.44 (3 H, m), 1.36-1.18 (2 H, m), 1.26 (3 H, d,  $J$  5.7), 0.85 (3 H, t,  $J$  7.2);  $\delta_{\text{C}}$  ( $\text{CDCl}_3$ , 75MHz) 138.1, 128.6, 127.9, 127.8, 99.7, 79.0, 75.7, 71.1, 70.4, 68.9, 36.1, 31.7, 19.2, 17.9, 13.9; HRMS ( $\text{EI}^+$ ,  $\text{M}^+$ ) Found: 294.18305, Calc. for  $\text{C}_{17}\text{H}_{26}\text{O}_4$  294.18311;  $m/z$  (EI): 294 ( $\text{M}^+$ , 2%), 222 (8), 91 (100);  $t_{\text{R}}$  (GC) 21.19 min.

### ***n*-butyl-3-(*O*-benzyl)-4-(*O*-methyl)-2,6-dideoxy- $\beta$ -DL-arabino-hexapyranoside **25****

A solution of **24** (55 mg, 0.194 mmol) in THF (20 mL) was treated with NaH (16 mg, 60% suspension in oil, 0.40 mmol) followed by MeI (85 mg, 0.6 mmol) at room temperature as for **16**. The work-up and isolation were performed as for **16** and the crude product **25** (59 mg, 99%) was characterised and used without purification:  $R_f$  (20% ethyl acetate in light petroleum) 0.66;  $\nu_{\text{max}}$  (film)/ $\text{cm}^{-1}$ : 2931w, 1454w, 1368w, 1094s, 1073m, 997m, 734m, 696m;  $\delta_{\text{H}}$  ( $\text{CDCl}_3$ , 300MHz); 7.22-7.17 (5 H, m), 4.58 (1 H, part of an AB system,  $^2J$  12.0), 4.53 (1 H, part of an AB system,  $^2J$  12.0), 4.30 (1 H, dd,  $J$  9.9, 2.0), 3.87 (1 H, dt,  $^2J$  9.5,  $J$  6.6), 3.52 (3 H, s), 3.42 (1 H, ddd,  $J$  11.8, 8.7, 5.2), 3.34 (1 H, dt,  $^2J$  9.5,  $J$  6.9), 3.15 (1 H, dq,  $J$  9.0, 6.0), 2.76 (1 H, m incl. app. t,  $J$  9.0), 2.21 (1 H, ddd,  $^2J$  12.6,  $J$  5.2, 2.0), 1.54-1.45 (3 H, m), 1.33-1.20 (2 H, m), 1.25 (3 H, d,  $J$  6.0), 0.84 (3 H, t,  $J$  7.5);  $\delta_{\text{C}}$  ( $\text{CDCl}_3$ , 75MHz) 138.5, 128.4, 127.6, 99.5, 85.9, 79.3, 71.45, 71.40, 69.1, 61.0, 37.0, 31.7, 19.2, 18.0, 13.9; HRMS ( $\text{EI}^+$ ,  $\text{M}^+$ ) Found: 308.19872, Calc. for  $\text{C}_{18}\text{H}_{28}\text{O}_4$  308.19876;  $m/z$  (EI): 308 ( $\text{M}^+$ , 2%), 234 (5), 91 (100);  $t_{\text{R}}$  (GC) 20.70 min.

### **(2R\*,4R\*)-2-*n*-butoxy-4-methoxy-6-(fluoromethyl)-2,3-dihydro-4H-pyran **33****

Was prepared from pyranol **30a** (100 mg, 0.49 mmol) in THF (20 mL), sodium hydride (40 mg, 60%

suspension in oil, 1.0 mmol) and iodomethane (213 mg, 1.5 mmol) as for **20** (see procedure for **21**). Work-up and isolation described for **20** afforded methyl ether **33** as an oil (104 mg, estimated yield 99%) which was characterised and used without purification;  $R_f$  (20% ethyl acetate in light petroleum) 0.50;  $\nu_{\max}$  (film)/ $\text{cm}^{-1}$ : 2936w, 1670m, 1118m, 1050s, 1019s, 660;  $\delta_H$  ( $\text{CDCl}_3$ , 300MHz); 5.09 (1 H, t,  $J$  3.1), 5.00 (1 H, dd,  $J$  6.6, 2.5), 4.63 (1 H, part of an ABX system,  $^2J_{\text{H-F}}$  47.6,  $^2J$  11.2), 4.60 (1 H, part of an ABX system,  $^2J_{\text{H-F}}$  47.3,  $^2J$  11.2), 3.94-3.91 (1 H, m), 3.78 (1 H, dt,  $^2J$  9.9,  $J$  6.6), 3.45 (1 H, dt,  $^2J$  9.9,  $J$  6.6), 3.28 (3 H, s), 2.24 (1 H, dddd,  $^2J$  13.6, 6.6, 2.5, 0.6), 2.24 (1 H, dt,  $^2J$  13.6, 6.6), 1.55-1.47 (2 H, m), 1.33-1.24 (2 H, m), 0.84 (3 H, t,  $J$  7.2);  $\delta_C$  ( $\text{CDCl}_3$ , 75MHz) 148.5 (d,  $^2J_{\text{C-F}}$  15.7), 101.7 (d,  $^3J_{\text{C-F}}$  7.5), 98.4, 81.3 (d,  $^1J_{\text{C-F}}$  168.0), 69.5, 68.9, 55.6, 33.0, 31.5, 19.9, 13.7;  $\delta_F$  ( $\text{CDCl}_3$ , 282MHz) (-219.5)-(-220.0) (m incl. app. t,  $^2J_{\text{F-H}}$  47.4) HRMS ( $\text{EI}^+$ ,  $\text{M}^+$ ) Found: 218.13177, Calc. for  $\text{C}_{11}\text{H}_{19}\text{FO}_3$  218.13182.

### ***n*-butyl-3-(*O*-methyl)-2,6-dideoxy-6-fluoro- $\beta$ -DL-arabino-hexapyranoside **34****

Was prepared as for **15** from crude **33** (0.49 mmol) in THF (10 mL),  $\text{BH}_3\cdot\text{SMe}_2$  (0.5 mL of a 2.0M solution in THF, 1.0 mmol) and  $\text{NaBO}_3\cdot\text{H}_2\text{O}$  (308 mg, 2.0 mmol). The work-up and isolation described for **15** followed by flash chromatography afforded 3-(*O*-methyl pyranoside **34** as a colorless oil (38 mg, 33% over 2 steps);  $R_f$  (50% ethyl acetate in light petroleum) 0.44;  $\nu_{\max}$  (film)/ $\text{cm}^{-1}$ : 3438w, 2959w, 2873w, 1737w, 1374w, 1106m, 1072s, 985m, 963m;  $\delta_H$  ( $\text{CDCl}_3$ , 300MHz); 4.62 (1 H, part of an ABMX system,  $^2J_{\text{H-F}}$  47.4,  $^2J$  9.9,  $J$  1.7), 4.56 (1 H, part of an ABMX system,  $^2J_{\text{H-F}}$  47.4,  $^2J$  9.9,  $J$  4.5), 4.43 (1 H, dd,  $J$  9.9, 2.1), 3.85 (1 H, dt,  $^2J$  9.6,  $J$  5.4), 3.45-3.28 (6 H, m, (including 3.33 (3 H, s))), 3.19 (1 H, ddd,  $J$  12.0, 7.5, 4.8), 2.28 (1 H, ddd,  $^2J$  12.6, 4.8, 2.1), 1.58-1.22 (5 H, m), 0.85 (3 H, t,  $J$  7.2);  $\delta_C$  ( $\text{CDCl}_3$ , 75MHz) 99.9, 82.5 (d,  $^1J_{\text{C-F}}$  171.1), 80.8, 74.5 (d,  $^2J_{\text{C-F}}$  18.0), 69.4, 69.3, 56.3, 34.9, 31.7, 19.2, 13.8;  $\delta_F$  ( $\text{CDCl}_3$ , 282MHz) -233.3 (td,  $^2J_{\text{F-H}}$  47.4,  $^3J_{\text{F-H}}$  22.8); HRMS ( $\text{EI}^+$ ,  $\text{M}^+$ ) Found: 235.13450, Calc. for  $\text{C}_{11}\text{H}_{20}\text{FO}_4$  235.13456;  $m/z$  (EI): 235 ( $\text{M-H}^+$ , 2%), 178 (4), 163 (12), 74 (100);  $t_R$  (GC)14.97 min.

### **3-(*O*-Methyl)-2,6-dideoxy-6-fluoro- $\beta$ -DL-arabino-hexapyranoside **35****

Was prepared from **34** (19 mg, 0.08 mmol) in THF (5 mL) and HCl (5 mL of a 1N aqueous solution) in an Ace tube at 70°C over 90 minutes as described for **27**. Work-up and isolation described for **27** followed by chromatography on silica gel afforded 3-(*O*-methyl)-pyranose **35** (14 mg, 93%) as a yellow oil, as a 69:31 mixture of  $\alpha$ - and  $\beta$ -anomers;  $R_f$  (20% ethyl acetate in light petroleum) 0.46;  $\nu_{\max}$  (film)/ $\text{cm}^{-1}$ : 3354m, 2942w, 1268w, 1078m, 1021s, 988s, 735m;  $\delta_H$  (Acetone  $d_6$ , 300MHz)  $\alpha$ -anomer: 5.19 (1 H, br. d,  $J$  2.4), 4.58-4.31 (2 H, m), 3.77 (1 H, dddd,  $^3J_{\text{H-F}}$  27.2,  $J$  10.2, 4.3, 2.0), 3.43 (1 H, ddd,  $J$  11.5, 8.7, 4.9), 3.24 (3 H, s), 3.24-3.12 (1 H, m), 2.74 (1 H, br s), 2.05 (1 H, ddd,  $^2J$  12.6,  $J$  4.9, 1.2), 1.24 (1 H, ddd,  $^2J$  12.6,  $J$  11.5, 3.6),  $\delta_H$  (Acetone  $d_6$ , 300MHz)  $\beta$ -anomer: 4.68 (1 H, dd,  $J$  9.6, 1.6), 4.58-4.31 (2 H, m), 3.35-3.06 (6 H, m (including 3.25 (3 H, s))), 2.18 (1 H, ddd,  $^2J$  12.3,  $J$  4.2, 1.6), 1.21-1.09 (1 H, m);  $\delta_C$  ( $\text{CDCl}_3$ , 75MHz)  $\alpha$ -anomer: 92.4, 82.6 (d,  $^1J_{\text{C-F}}$  171.4), 77.9, 70.9 (d,  $^2J_{\text{C-F}}$  17.2), 69.8 (d,  $^3J_{\text{C-F}}$  7.3), 56.5, 33.6,  $\delta_C$  ( $\text{CDCl}_3$ , 75MHz)  $\beta$ -anomer: 94.4, 82.3 (d,  $^1J_{\text{C-F}}$  170.3), 80.6, 74.5 (d,  $^2J_{\text{C-F}}$  18.4), 69.0, 56.4, 36.1;  $\delta_F$

(Acetone  $d_6$ , 282MHz)  $\alpha$ -anomer:  $-234.5$  (td,  $^2J_{F-H}$  47.9,  $^3J_{F-H}$  27.2),  $\delta_F$  (Acetone  $d_6$ , 282MHz)  $\beta$ -anomer:  $-233.5$  (td,  $^2J_{F-H}$  47.9,  $^3J_{F-H}$  24.5); HRMS (EI<sup>+</sup>, M<sup>+</sup>) Found: 180.07962, Calc. for C<sub>7</sub>H<sub>13</sub>FO<sub>4</sub> 180.07979;  $m/z$  (EI): 180 (M<sup>+</sup>, 2%), 162 (2), 130 (9), 87 (100);  $t_R$  (GC) 12.54 min.

**Prep of *n*-butyl-3-(*O*-benzyl)-2,6-dideoxy-6-fluoro- $\beta$ -DL-arabino-hexapyranoside **37** via (**2R\***, **4R\***)-2-*n*-butoxy-4-benzyloxy-6-(fluoromethyl)-2,3-dihydro-4*H*-pyran **36**** Was prepared as for **23** (see procedure for **24**) from **30a** (100 mg, 0.49 mmol), NaH (40 mg, 60% suspension in oil, 1.0 mmol) and BnBr (256 mg, 1.5 mmol) in THF (25 mL). The work-up and isolation described for **23** afforded benzyl ether **36** as a yellow oil which was used without purification.

A solution of crude **36** (0.49 mmol) in THF (30 mL) was treated with BH<sub>3</sub>.SMe<sub>2</sub> (0.5 mL of a 2.0M solution in THF, 1.0 mmol), water (2 mL) and NaBO<sub>3</sub>.H<sub>2</sub>O (308 g, 2.0 mmol) as described for **14**. The work-up and isolation described for **15** followed by flash chromatography (20% ethyl acetate in hexane) afforded 3-(*O*-benzyl) pyranoside **37** as a white solid (76 mg, 50% over 2 steps);  $R_f$  (20% ethyl acetate in hexane) 0.22; mp 58-60 °C;  $\nu_{max}$  (film)/cm<sup>-1</sup>: 3346w, 2962w, 2931w, 1366m, 1102m, 1064s, 981s, 954m, 869m, 745m, 696s;  $\delta_H$  (CDCl<sub>3</sub>, 300MHz); 7.33-7.17 (5 H, m), 4.60 (1 H, part of an AB,  $^2J$  11.6), 4.58 (1 H, part of an ABMX system,  $^2J_{H-F}$  47.6,  $^2J$  9.8,  $J$  1.8), 4.52 (1 H, part of an ABMX system,  $^2J_{H-F}$  47.6,  $^2J$  9.8,  $J$  4.7), 4.41-4.36 (2 H, m (incl. 4.39 (1 H, part of an AB,  $^2J$  11.6))), 3.83 (1 H, dt,  $^2J$  9.6,  $J$  6.6), 3.45-3.27 (4 H, m), 2.56 (1 H, br s), 2.26 (1 H, ddd,  $^2J$  12.6, 4.2, 1.8), 1.56-1.44 (3 H, m), 1.35-1.23 (2 H, m), 0.84 (3 H, t,  $J$  7.2);  $\delta_C$  (CDCl<sub>3</sub>, 75MHz) 137.9, 128.6, 128.0, 127.8, 99.9, 82.5 (d,  $^1J_{C-F}$  171.3), 78.9, 74.5 (d,  $^2J_{C-F}$  18.1), 70.8, 69.5 (d,  $^3J_{C-F}$  7.2), 69.3, 35.7, 31.7, 19.2, 13.9;  $\delta_F$  (CDCl<sub>3</sub>, 282MHz)  $-233.2$  (td,  $^2J_{F-H}$  47.6,  $^3J_{F-H}$  22.6); HRMS (EI<sup>+</sup>, M<sup>+</sup>) Found: 312.17364, Calc. for C<sub>17</sub>H<sub>25</sub>FO<sub>4</sub> 312.17369;  $m/z$  (EI): 311 (M-H<sup>+</sup>, 2%), 238 (8), 220 (5), 132 (40), 91 (100);  $t_R$  (GC) 21.86 min. Satisfactory microanalysis could not be obtained for this compound.

### ***n*-Butyl-3-(*O*-benzyl)-4-(*O*-methyl)-2,6-dideoxy-6-fluoro- $\beta$ -DL-arabino-hexapyranoside **38****

Was prepared from **37** (75 mg, 0.24 mmol), sodium hydride (20 mg, 60% suspension in oil, 0.48 mmol) and MeI (102 mg, 0.72 mmol) in THF (20 mL) as described for **20** (see preparation of **21**). The work-up and isolation described for **20** followed by flash chromatography (20% ethyl acetate in hexane) afforded **38** (73 mg, 94%);  $R_f$  (20% ethyl acetate in light petroleum) 0.47;  $\nu_{max}$  (film)/cm<sup>-1</sup>: 2930w, 1454w, 1369m, 1116s, 1096s, 1074s, 991m, 735m, 697m;  $\delta_H$  (CDCl<sub>3</sub>, 300MHz); 7.31-7.10 (5 H, m), 4.59-4.37 (2 H, m incl. app. d,  $^2J_{H-F}$  47.4), 4.53 (1 H, part of an AB system,  $^2J$  11.7), 4.47 (1 H, part of an AB system,  $^2J$  11.7), 4.28 (1 H, dd,  $J$  9.6, 1.6), 3.74 (1 H, dt,  $^2J$  9.5,  $J$  6.6), 3.48-3.37 (4 H, m (incl. 3.44 (3 H, s))), 3.28 (1 H, dt,  $^2J$  9.5,  $J$  6.6), 3.26-2.99 (2 H, m), 2.15 (1 H, ddd,  $^2J$  12.6,  $J$  4.8, 1.6), 1.52-1.38 (3 H, m), 1.28-1.16 (2 H, m), 0.77 (3 H, t,  $J$  7.2);  $\delta_C$  (CDCl<sub>3</sub>, 75MHz) 138.4, 128.40, 127.7, 127.6, 99.9, 82.3 (d,  $^1J_{C-F}$  171.7), 79.0, 78.9 (d,  $^3J_{C-F}$  6.1), 74.3 (d,  $^2J_{C-F}$  18.5), 71.4, 69.2, 60.7, 36.6, 31.7, 19.2, 13.9;  $\delta_F$  (CDCl<sub>3</sub>, 282MHz)  $-232.4$  (td,  $^2J_{F-H}$  47.4,  $^3J_{F-H}$  25.7); HRMS (EI<sup>+</sup>, M<sup>+</sup>) Found: 326.18934, Calc. for C<sub>18</sub>H<sub>27</sub>FO<sub>4</sub> 326.18934;  $m/z$

(EI): 325 (M-H<sup>+</sup>, 2%), 252 (4), 220 (4), 163 (19), 130 (21), 90 (100); t<sub>R</sub> (GC) 21.39 min.

#### ***n*-butyl-3-(*O*-benzyl)-4-(*O*-methyl)-6-fluoro-2,6-dideoxy-β-DL-arabino-hexapyranoside 39**

Was prepared from **38** (73 mg, 0.22 mmol) in absolute ethanol (10 mL) containing 10% palladium-on-carbon (25 mg, 0.022 mmol) under an atmosphere of hydrogen as described for **26**. The work-up and isolation described for **26** followed by chromatography on silica gel (20% ethyl acetate in hexane) afforded 4-(*O*-methyl) pyranoside **39** (45 mg, 86%) as a white solid; R<sub>f</sub> (50% ethyl acetate in light petroleum) 0.5; Mp 50-52 °C; ν<sub>max</sub> (film)/cm<sup>-1</sup>: 3342m, 2937m, 2869m, 1462m, 1372m, 1113s, 1098s, 1067s, 1012s, 973s, 952s, 895m, 867m; δ<sub>H</sub> (CDCl<sub>3</sub>, 300MHz); 4.60 (1 H, part of an ABMX system, <sup>2</sup>J<sub>H-F</sub> 47.8, <sup>2</sup>J 10.0, *J* 2.1), 4.55 (1 H, part of an ABMX system, <sup>2</sup>J<sub>H-F</sub> 47.8, <sup>2</sup>J 10.0, *J* 3.0), 4.45 (1 H, dd, *J* 9.3, 2.1), 3.82 (1 H, dt, <sup>2</sup>J 9.5, *J* 6.6), 3.66 (1 H, ddd, *J* 11.6, 8.7, 5.2), 3.50 (3 H, s), 3.37 (1 H, dt, <sup>2</sup>J 9.5, *J* 6.6), 3.24 (1 H, dddd, <sup>2</sup>J<sub>H-F</sub> 27.3, *J* 9.6, 3.0, 2.1), 3.02 (1 H, m incl. app. t, *J* 9.0), 2.41 (1 H, s), 2.13 (1 H, ddd, <sup>2</sup>J 12.6, 5.2, 2.1), 1.59 (1 H, ddd, <sup>2</sup>J 12.6, *J* 11.6, 9.3), 1.54-1.46 (2 H, m), 1.33-1.26 (2 H, m), 0.85 (3 H, t, *J* 7.5); δ<sub>C</sub> (CDCl<sub>3</sub>, 75MHz) 99.8, 82.2 (d, <sup>1</sup>J<sub>C-F</sub> 172.5), 80.7 (d, <sup>3</sup>J<sub>C-F</sub> 5.2), 74.5 (d, <sup>2</sup>J<sub>C-F</sub> 18.7), 71.4, 69.2, 60.7, 38.5, 31.6, 19.2, 13.8; δ<sub>F</sub> (CDCl<sub>3</sub>, 282MHz) -231.7 (td, <sup>2</sup>J<sub>F-H</sub> 47.8, <sup>3</sup>J<sub>F-H</sub> 27.3); HRMS (EI<sup>+</sup>, M<sup>+</sup>) Found: 236.14230, Calc. for C<sub>11</sub>H<sub>21</sub>FO<sub>4</sub> 236.14239; *m/z* (EI): 235 (M-H<sup>+</sup>, 1%), 179 (3), 162 (10), 145 (31), 90 (100); t<sub>R</sub> (GC) 15.08 min. Satisfactory microanalysis could not be obtained for this compound.

#### **4-(*O*-methyl)-2,6-dideoxy-6-fluoro-β-DL-arabino-hexapyranoside 40**

Was prepared from **39** (39 mg, 0.165 mmol) in THF (3 mL) and HCl (3 mL of a 1N solution) in an Ace tube at 80 °C over 2 hours as described for **27**. Work-up and isolation described for **27** followed by chromatography on silica gel afforded 4-(*O*-methyl) pyranoside **40** (12 mg, 42%) as a pale yellow oil, as a 76:24 mixture of α- and β-anomers; R<sub>f</sub> (50% ethyl acetate in light petroleum) 0.08; ν<sub>max</sub> (film)/cm<sup>-1</sup>: 3345m, 2849w, 1716s, 1262s, 1095s, 1019s, 725s; δ<sub>H</sub> (CDCl<sub>3</sub>, 300MHz) α-anomer: 5.33 (1 H, br. d, *J* 3.2), 4.69-4.40 (2 H, m), 4.03 (1 H, ddd, *J* 12.0, 9.0, 5.1), 3.81 (1 H, m incl. dd, <sup>2</sup>J<sub>H-F</sub> 29.5, *J* 9.6), 3.52 (3 H, s), 3.05 (1 H, m incl. app. t, *J* 9.4), 2.89 (1 H, br s), 2.46 (1 H, br s), 2.10 (1 H, m, incl. dd, <sup>2</sup>J 13.0, *J* 5.1), 1.65 (1 H, ddd, <sup>2</sup>J 13.0, *J* 12.0, 3.6), δ<sub>H</sub> (CDCl<sub>3</sub>, 300MHz) β-anomer: 4.80 (1 H, dd, *J* 8.1, 1.8), 4.69-4.42 (2 H, m), 3.71-3.59 (1 H, m), 3.52 (3 H, s), 3.38-3.19 (1 H, m), 3.04 (1 H, t, *J* 9.0), 2.24 (1 H, ddd, <sup>2</sup>J 12.3, *J* 4.8, 1.8), 1.65-1.47 (1 H, m); δ<sub>C</sub> (CDCl<sub>3</sub>, 75MHz) α-anomer: 92.2, 82.4 (d, <sup>1</sup>J<sub>C-F</sub> 170.8), 81.1 (d, <sup>3</sup>J<sub>C-F</sub> 5.1), 70.3 (d, <sup>2</sup>J<sub>C-F</sub> 18.2), 68.5, 61.0, 37.3, δ<sub>C</sub> (CDCl<sub>3</sub>, 75MHz) β-anomer: 94.3, 82.0 (d, <sup>1</sup>J<sub>C-F</sub> 171.9), 80.4 (d, <sup>3</sup>J<sub>C-F</sub> 5.0), 74.3 (d, <sup>2</sup>J<sub>C-F</sub> 17.5), 71.2, 61.0, 40.0; δ<sub>F</sub> (CDCl<sub>3</sub>, 282MHz) α-anomer: -233.4 (td, <sup>2</sup>J<sub>F-H</sub> 47.9, <sup>3</sup>J<sub>F-H</sub> 29.5), δ<sub>F</sub> (CDCl<sub>3</sub>, 282MHz) β-anomer: -232.4 (td, <sup>2</sup>J<sub>F-H</sub> 47.4, <sup>3</sup>J<sub>F-H</sub> 27.6); HRMS (EI<sup>+</sup>, M<sup>+</sup>) Found: 180.07976, Calc. for C<sub>7</sub>H<sub>13</sub>FO<sub>4</sub> 180.07979; *m/z* (EI): 180 (M<sup>+</sup>, 2%), 162 (1), 144 (4), 74 (100); t<sub>R</sub> (GC) 12.75 min.



## Transition and product structures for acetylketene dimerisation reactions

Electronic structure calculations were carried out on a Dell Optiplex 755 (Core 2 Quad Processor, 4GB RAM) running Spartan'06 V1.1.0.

Conformational searching was carried out using a Monte Carlo method implemented in Spartan'06 with the MMFF94 force field. Low energy conformers were selected based on the energies of geometries optimised with the B3LYP/6-31G\* method. The lowest energy dioxinone and pyranone conformers were used as starting points for transition structure searches which were carried out in PM3 implemented in Spartan'06 by stepping along the reaction coordinate. These structures were then used as the starting points from B3LYP/6-31G\*, MP2/6-31G\* or MP2/6-311+G\*\* optimisations with full frequency calculation at 298K or 373K.

A number of subtle conformational differences between fluorinated and non-fluorinated systems were detected. The orientation of the methyl group was different in the non-fluorinated and fluorinated systems; the fluoromethyl group was rotated so that the fluorine atom approached within 2.23 Å of the vinylic (H-3) proton. This allows a C-F bond to locate antiparallel to the almost completely formed ketonic carbonyl group, an arrangement which minimises the dipolar repulsion between C-F and C=O bonds. The DFT method aligns a C-H bond with the C=O bond and minimises 1,3-allylic strain. The correlated method rotates the methyl group, positioning a C-H bond orthogonal to C=O presumably allowing a  $\sigma/\pi^*$  interaction to develop. None of the other bond lengths or angles appear to be perturbed by fluorination.

Optimisation at the MP2 level of theory and the 6-311+G\*\* basis had very little effect on bond angles and lengths.

## Electronic structure calculations

Energies, Cartesian coordinates, imaginary frequencies (where appropriate) and thermal corrections for:

3, 42a, 4, acetone, 43a, 44a, methyl vinyl ether, 5<sub>eq</sub>, 5<sub>ax</sub>, 46a, 45a, 47a, 48a, 8, 42b, 28, 43b, 44b, 29<sub>eq</sub> (methyl pyranoside), 29<sub>ax</sub> (methyl pyranoside), 46b, 45b, 47b, 48b.

Dioxinone 3

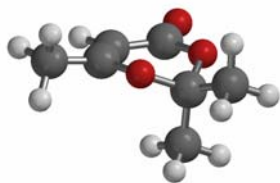

MP2/6-31G\*

MP2 total energy: **-496.9266803 hartrees**

| Atom |       | Cartesian Coordinates (Angstroms) |            |            |
|------|-------|-----------------------------------|------------|------------|
|      |       | X                                 | Y          | Z          |
| 1    | C C1  | -0.0676685                        | 1.3730103  | 1.2057255  |
| 2    | H H2  | 0.1051718                         | 2.3068510  | 1.7256346  |
| 3    | C C2  | -0.2146158                        | 1.3339802  | -0.1367342 |
| 4    | O O1  | -0.4352606                        | 0.1644814  | -0.7973612 |
| 5    | C C3  | -0.1042322                        | -1.0256331 | -0.0477965 |
| 6    | C C4  | -0.3447969                        | 0.1896048  | 2.0124165  |
| 7    | O O2  | -0.6153885                        | -0.9589642 | 1.2845379  |
| 8    | C C5  | 1.4037902                         | -1.2071244 | -0.0317434 |
| 9    | H H1  | 1.8927076                         | -0.3496315 | 0.4348848  |
| 10   | H H5  | 1.7716846                         | -1.3161211 | -1.0547994 |
| 11   | H H7  | 1.6496673                         | -2.1051797 | 0.5396075  |
| 12   | C C6  | -0.8421648                        | -2.1543216 | -0.7231743 |
| 13   | H H6  | -0.5189141                        | -2.2384951 | -1.7630969 |
| 14   | H H8  | -1.9134914                        | -1.9494464 | -0.6897906 |
| 15   | H H9  | -0.6372624                        | -3.0903066 | -0.1995223 |
| 16   | O O3  | -0.4408513                        | 0.1617418  | 3.2245236  |
| 17   | C C7  | -0.1756725                        | 2.5004343  | -1.0634965 |
| 18   | H H3  | 0.6472953                         | 2.3893290  | -1.7755941 |
| 19   | H H4  | -0.0533606                        | 3.4316861  | -0.5076039 |
| 20   | H H10 | -1.1066371                        | 2.5441048  | -1.6366172 |

Standard Thermodynamic quantities at 298.15 K and 1.00 atm  
 Temp. Correction Hv 465.6177  
 Entropy Correction (Hv-TSv) 347.9140

Standard Thermodynamic quantities at 373.00 K and 1.00 atm  
 Temp. Correction Hv 479.0335  
 Entropy Correction (Hv-TSv) 316.8568

Fragmentation transition state 42a

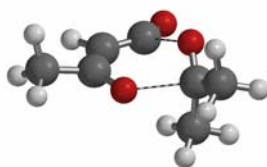

MP2/6-31G\*

MP2 total energy: **-496.8727623 hartrees**

| Atom |       | Cartesian Coordinates (Angstroms) |            |            |
|------|-------|-----------------------------------|------------|------------|
|      |       | X                                 | Y          | Z          |
| 1    | C C4  | 2.8121750                         | 0.8231621  | 0.1909584  |
| 2    | C C1  | 1.4217560                         | 0.2235780  | 0.1142951  |
| 3    | C C2  | 1.3916590                         | -1.2105330 | 0.0602764  |
| 4    | H H2  | 2.3403068                         | -1.7178532 | -0.0890785 |
| 5    | C C3  | 0.3559941                         | -2.1023021 | 0.1666754  |
| 6    | O O1  | -0.0310018                        | -3.2187858 | 0.1085704  |
| 7    | O O3  | -1.0539540                        | -1.0254591 | 0.8723704  |
| 8    | C C5  | -1.4492475                        | -0.0575620 | 0.1829097  |
| 9    | O O2  | 0.4495668                         | 1.0158884  | 0.1052878  |
| 10   | C C6  | -1.5343254                        | -0.1238904 | -1.3175905 |
| 11   | H H3  | -0.7328932                        | -0.7363438 | -1.7301578 |
| 12   | H H5  | -1.4958275                        | 0.8748459  | -1.7527618 |
| 13   | H H7  | -2.4958237                        | -0.5848134 | -1.5762692 |
| 14   | C C7  | -2.2124416                        | 1.0352428  | 0.8740667  |
| 15   | H H8  | -1.9378735                        | 1.0589482  | 1.9286023  |
| 16   | H H9  | -3.2852684                        | 0.8263573  | 0.7854848  |
| 17   | H H10 | -2.0051048                        | 1.9995285  | 0.4077923  |
| 18   | H H1  | 3.1742673                         | 0.7681178  | 1.2234166  |
| 19   | H H4  | 2.7680681                         | 1.8704604  | -0.1119482 |
| 20   | H H6  | 3.5199683                         | 0.2814132  | -0.4429005 |

Standard Thermodynamic quantities at 298.15 K and 1.00 atm

$v_i = -241.782 \text{ cm}^{-1}$

Temp. Correction Hv 455.6219

Entropy Correction (Hv-TSv) 327.4236

Standard Thermodynamic quantities at 373.00 K and 1.00 atm

$v_i = -241.771 \text{ cm}^{-1}$

Temp. Correction Hv 469.6680

Entropy Correction (Hv-TSv) 293.6525

## Oxoketene 4

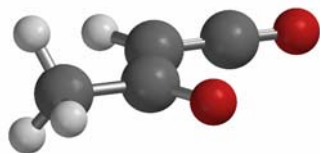

MP2/6-31G\*

MP2 total energy: **-304.3550052 hartrees**

| Atom |      | Cartesian Coordinates (Angstroms) |            |            |
|------|------|-----------------------------------|------------|------------|
|      |      | X                                 | Y          | Z          |
| 1    | C C2 | 2.2345470                         | -0.4291366 | 0.0000000  |
| 2    | C C1 | 0.8428684                         | 0.1613058  | 0.0000000  |
| 3    | O O1 | 0.6423646                         | 1.3781117  | 0.0000000  |
| 4    | C C3 | -0.2586656                        | -0.8132449 | 0.0000000  |
| 5    | C C4 | -1.5005375                        | -0.3234213 | 0.0000000  |
| 6    | O O2 | -2.5821354                        | 0.1276188  | 0.0000000  |
| 7    | H H5 | -0.1171228                        | -1.8868660 | 0.0000000  |
| 8    | H H1 | 2.9625417                         | 0.3825782  | 0.0000000  |
| 9    | H H2 | 2.3817366                         | -1.0572867 | -0.8841844 |
| 10   | H H4 | 2.3817366                         | -1.0572867 | 0.8841844  |

Standard Thermodynamic quantities at 298.15 K and 1.00 atm  
Temp. Correction Hv 208.4237  
Entropy Correction (Hv-TSv) 108.8417

Standard Thermodynamic quantities at 373.00 K and 1.00 atm  
Temp. Correction Hv 216.1090  
Entropy Correction (Hv-TSv) 82.9707

## Acetone

MP2/6-31G\*

MP2 total energy: **-192.5239050 hartrees**

Standard Thermodynamic quantities at 298.15 K and 1.00 atm  
Temp. Correction Hv 242.0619  
Entropy Correction (Hv-TSv) 153.4834

Standard Thermodynamic quantities at 373.00 K and 1.00 atm  
Temp. Correction Hv 248.3179  
Entropy Correction (Hv-TSv) 130.5391

Cycloaddition transition state 43a

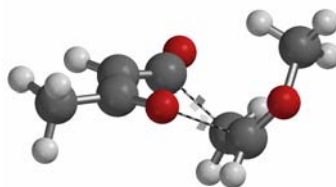

MP2/6-31G\*

MP2 total energy: -496.8064090 hartrees

| Atom |       | Cartesian Coordinates (Angstroms) |            |            |
|------|-------|-----------------------------------|------------|------------|
|      |       | X                                 | Y          | Z          |
| 1    | C C1  | 1.5987494                         | -0.3718375 | 0.0020858  |
| 2    | H H4  | 2.0714488                         | 1.4892177  | -1.0019842 |
| 3    | C C2  | 1.2766522                         | 0.9059670  | -0.5452363 |
| 4    | O O1  | 0.7722763                         | -1.2311997 | 0.3871395  |
| 5    | C C3  | 0.0610487                         | 1.5476048  | -0.5866501 |
| 6    | O O2  | -0.4877248                        | 2.4714488  | -1.1276250 |
| 7    | C C4  | -1.2680526                        | -0.4079524 | 1.1156520  |
| 8    | H H8  | -0.7999812                        | -0.8810415 | 1.9698425  |
| 9    | C C5  | -1.1944720                        | 0.9535002  | 0.8689367  |
| 10   | H H5  | -0.7735550                        | 1.5502164  | 1.6712640  |
| 11   | H H10 | -2.0194436                        | 1.4123632  | 0.3399090  |
| 12   | C C6  | 3.0743745                         | -0.7053067 | 0.1207417  |
| 13   | H H7  | 3.2286131                         | -1.7498376 | -0.1599184 |
| 14   | H H9  | 3.3829564                         | -0.5909776 | 1.1654499  |
| 15   | O O3  | -2.0006894                        | -1.2759891 | 0.4394701  |
| 16   | C C7  | -2.5540438                        | -0.8312137 | -0.8107176 |
| 17   | H H3  | -3.3261357                        | -0.0742479 | -0.6497418 |
| 18   | H H11 | -2.9896908                        | -1.7204005 | -1.2609996 |
| 19   | H H12 | -1.7538398                        | -0.4306061 | -1.4382517 |
| 20   | H H1  | 3.7015095                         | -0.0597079 | -0.4993663 |

Standard Thermodynamic quantities at 298.15 K and 1.00 atm

$\nu_i = -355.509 \text{ cm}^{-1}$

Temp. Correction Hv 457.7998

Entropy Correction (Hv-TSv) 325.6194

Standard Thermodynamic quantities at 373.00 K and 1.00 atm

$\nu_i = -355.509 \text{ cm}^{-1}$

Temp. Correction Hv 471.5236

Entropy Correction (Hv-TSv) 290.8877

Cycloaddition transition state 44a

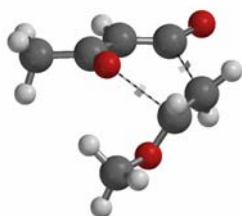

MP2/6-31G\*

MP2 total energy: **-496.8087338 hartrees**

| Atom |       | Cartesian Coordinates (Angstroms) |            |            |
|------|-------|-----------------------------------|------------|------------|
|      |       | X                                 | Y          | Z          |
| 1    | C C1  | 1.0791364                         | -0.4514449 | -0.7330427 |
| 2    | H H4  | 2.1364763                         | 1.3192079  | -1.3884297 |
| 3    | C C2  | 1.1578256                         | 0.8847262  | -1.2053364 |
| 4    | O O1  | 0.0284397                         | -1.1403668 | -0.6599202 |
| 5    | C C3  | 0.1238147                         | 1.7414537  | -1.5229895 |
| 6    | O O2  | -0.0902662                        | 2.7419764  | -2.1527240 |
| 7    | C C4  | -1.6372600                        | 0.2631755  | 0.2061738  |
| 8    | C C5  | -1.5295547                        | 1.4551767  | -0.4802841 |
| 9    | H H5  | -1.3448687                        | 2.3412698  | 0.1187444  |
| 10   | H H10 | -2.2022662                        | 1.5755283  | -1.3216303 |
| 11   | C C6  | 2.3772172                         | -1.0908307 | -0.2773367 |
| 12   | H H7  | 2.3851579                         | -2.1411279 | -0.5778210 |
| 13   | H H9  | 2.4293104                         | -1.0515626 | 0.8167157  |
| 14   | O O4  | -1.1911030                        | 0.1860352  | 1.4508018  |
| 15   | C C8  | -1.2046056                        | -1.1343602 | 2.0389142  |
| 16   | H H2  | -0.9140049                        | -0.9922169 | 3.0780550  |
| 17   | H H1  | -0.4947343                        | -1.7626835 | 1.5017879  |
| 18   | H H6  | -2.2117557                        | -1.5561142 | 1.9850021  |
| 19   | H H11 | -2.1551584                        | -0.6025293 | -0.1956892 |
| 20   | H H3  | 3.2581993                         | -0.5853126 | -0.6809911 |

Standard Thermodynamic quantities at 298.15 K and 1.00 atm

$v_i = -345.919 \text{ cm}^{-1}$

Temp. Correction Hv 457.4228

Entropy Correction (Hv-TSv) 327.5427

Standard Thermodynamic quantities at 373.00 K and 1.00 atm

$v_i = -345.919 \text{ cm}^{-1}$

Temp. Correction Hv 471.1980

Entropy Correction (Hv-TSv) 293.3821

Methyl vinyl ether

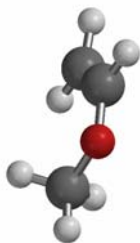

MP2/6-31G\*

MP2 total energy: **-192.4759785 hartrees**

|       |      | Cartesian Coordinates (Angstroms) |            |            |
|-------|------|-----------------------------------|------------|------------|
| Atom  |      | X                                 | Y          | Z          |
| ----- |      | -----                             | -----      | -----      |
| 1     | C C1 | 1.3685085                         | -0.4848700 | 0.0000000  |
| 2     | H H2 | 2.4478285                         | -0.5632907 | 0.0000000  |
| 3     | H H3 | 0.8013557                         | -1.4058992 | 0.0000000  |
| 4     | C C2 | 0.8155628                         | 0.7363362  | 0.0000000  |
| 5     | H H4 | 1.4143430                         | 1.6420571  | 0.0000000  |
| 6     | O O1 | -0.5080783                        | 1.0613998  | 0.0000000  |
| 7     | C C3 | -1.4058701                        | -0.0450304 | 0.0000000  |
| 8     | H H1 | -1.2636324                        | -0.6626767 | -0.8932484 |
| 9     | H H5 | -2.4063854                        | 0.3846504  | 0.0000000  |
| 10    | H H6 | -1.2636324                        | -0.6626767 | 0.8932484  |

Standard Thermodynamic quantities at 298.15 K and 1.00 atm  
Temp. Correction Hv 243.8504  
Entropy Correction (Hv-TSv) 159.0624

Standard Thermodynamic quantities at 373.00 K and 1.00 atm  
Temp. Correction Hv 249.8891  
Entropy Correction (Hv-TSv) 137.0967

Pyranone 5<sub>eq</sub>

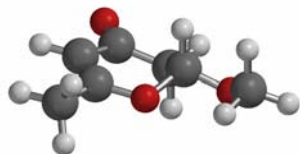

MP2/6-31G\*

MP2 total energy: **-496.8902720 hartrees**

| Atom |       | Cartesian Coordinates (Angstroms) |            |            |
|------|-------|-----------------------------------|------------|------------|
|      |       | X                                 | Y          | Z          |
| 1    | C C5  | -0.7970816                        | -2.7700853 | -0.0649793 |
| 2    | C C1  | -0.7116182                        | -1.2805777 | -0.0295683 |
| 3    | C C2  | -1.7496149                        | -0.4356230 | 0.1924473  |
| 4    | H H2  | -2.7389699                        | -0.8303298 | 0.3969084  |
| 5    | C C4  | -1.5966365                        | 1.0095966  | 0.0420699  |
| 6    | O O2  | -2.5205846                        | 1.8104324  | 0.1988395  |
| 7    | C C6  | -0.2079494                        | 1.4522511  | -0.3916240 |
| 8    | H H7  | -0.1378038                        | 1.4206962  | -1.4860348 |
| 9    | C C3  | 0.8245597                         | 0.5118456  | 0.1745533  |
| 10   | O O1  | 0.5614187                         | -0.8504174 | -0.2575932 |
| 11   | H H10 | -0.0223069                        | 2.4773539  | -0.0615976 |
| 12   | H H1  | -0.1736868                        | -3.2025248 | 0.7232496  |
| 13   | H H4  | -0.4177581                        | -3.1357972 | -1.0239864 |
| 14   | H H9  | 0.7826390                         | 0.4895203  | 1.2792725  |
| 15   | O O3  | 2.0800132                         | 0.8683488  | -0.2778953 |
| 16   | C C7  | 3.1302657                         | 0.0971762  | 0.3145397  |
| 17   | H H3  | 3.0573178                         | 0.1221579  | 1.4087790  |
| 18   | H H5  | 4.0610894                         | 0.5672868  | -0.0007929 |
| 19   | H H6  | 3.0993175                         | -0.9388425 | -0.0302769 |
| 20   | H H8  | -1.8281643                        | -3.1039320 | 0.0630397  |

Standard Thermodynamic quantities at 298.15 K and 1.00 atm  
 Temp. Correction Hv 467.8255  
 Entropy Correction (Hv-TSv) 346.9774

Standard Thermodynamic quantities at 373.00 K and 1.00 atm  
 Temp. Correction Hv 480.8994  
 Entropy Correction (Hv-TSv) 315.1693



Pyranone 5<sub>ax</sub>

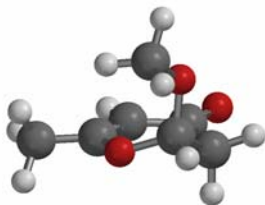

MP2/6-31G\*

MP2 total energy: **-496.8923195 hartrees**

Cartesian Coordinates (Angstroms)

| Atom |       | X          | Y          | Z          |
|------|-------|------------|------------|------------|
| 1    | C C5  | 0.6199135  | -2.7402501 | 0.1034841  |
| 2    | C C1  | 0.0301314  | -1.3807608 | -0.0705336 |
| 3    | C C2  | -1.1582648 | -0.9686093 | 0.4285866  |
| 4    | H H2  | -1.7502440 | -1.6342341 | 1.0476709  |
| 5    | C C4  | -1.6850664 | 0.3588739  | 0.1276445  |
| 6    | O O2  | -2.7311987 | 0.8010907  | 0.6049414  |
| 7    | C C6  | -0.8795343 | 1.1306410  | -0.9040284 |
| 8    | H H7  | -1.2046156 | 0.8151438  | -1.9036295 |
| 9    | C C3  | 0.5929831  | 0.8350673  | -0.7445752 |
| 10   | O O1  | 0.8545476  | -0.5839352 | -0.8220735 |
| 11   | O O3  | 0.9843524  | 1.3486224  | 0.4918135  |
| 12   | C C7  | 2.3817735  | 1.1957544  | 0.7465133  |
| 13   | H H3  | 2.9740410  | 1.6011153  | -0.0835677 |
| 14   | H H5  | 2.6461219  | 0.1458515  | 0.8974751  |
| 15   | H H9  | 2.5857388  | 1.7637055  | 1.6536438  |
| 16   | H H6  | 1.2107215  | 1.2435881  | -1.5562620 |
| 17   | H H10 | -1.0693751 | 2.2008651  | -0.7954067 |
| 18   | H H1  | -0.0631468 | -3.3915111 | 0.6516745  |
| 19   | H H4  | 1.5688050  | -2.6739676 | 0.6444439  |
| 20   | H H8  | 0.8287270  | -3.1810788 | -0.8760407 |

Standard Thermodynamic quantities at 298.15 K and 1.00 atm  
 Temp. Correction Hv 468.2011  
 Entropy Correction (Hv-TSv) 347.7187

Standard Thermodynamic quantities at 373.00 K and 1.00 atm  
 Temp. Correction Hv 481.2176  
 Entropy Correction (Hv-TSv) 316.0095

Synchronous dimerisation transition state 46a

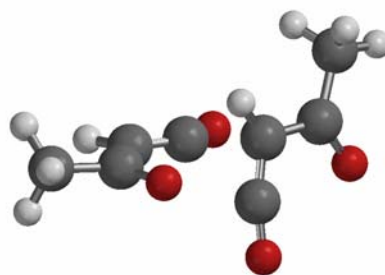

MP2/6-31G\*

MP2 total energy: **-608.7067036 hartrees**

Cartesian Coordinates (Angstroms)

| Atom     | X          | Y          | Z          |
|----------|------------|------------|------------|
| 1 C C1   | 1.0758332  | -1.6918855 | -0.1980747 |
| 2 H H4   | 2.6809196  | -0.2431977 | -0.3912810 |
| 3 C C2   | 1.6333705  | -0.3701206 | -0.1272949 |
| 4 O O5   | -0.0702413 | -2.0364107 | 0.1739351  |
| 5 C C3   | 1.0599293  | 0.7965430  | 0.2903869  |
| 6 O O2   | 1.1491306  | 1.9484755  | 0.5668146  |
| 7 C C5   | -1.1273525 | 0.3588412  | 0.3588716  |
| 8 H H10  | -1.2095335 | -0.0870354 | -0.6230891 |
| 9 C C6   | 2.0009940  | -2.7551023 | -0.7485389 |
| 10 H H7  | 1.4132216  | -3.6373060 | -1.0056470 |
| 11 H H9  | 2.7342734  | -3.0313868 | 0.0171729  |
| 12 H H3  | 2.5472554  | -2.3973165 | -1.6255168 |
| 13 C C7  | -1.6558085 | 1.7101696  | 0.6585107  |
| 14 O O3  | -1.7170543 | 2.1365180  | 1.8111610  |
| 15 C C9  | -2.0344228 | 2.5371134  | -0.5454892 |
| 16 H H5  | -1.1586371 | 2.6725628  | -1.1883533 |
| 17 H H8  | -2.3953804 | 3.5095545  | -0.2092708 |
| 18 H H12 | -2.8092799 | 2.0329280  | -1.1314593 |
| 19 C C4  | -1.0560639 | -0.4903020 | 1.4256699  |
| 20 O O4  | -1.0611551 | -0.9626425 | 2.4914926  |

Standard Thermodynamic quantities at 298.15 K and 1.00 atm

$v_i = -240.684 \text{ cm}^{-1}$

Temp. Correction Hv 420.3632

Entropy Correction (Hv-TSv) 276.8169

Standard Thermodynamic quantities at 373.00 K and 1.00 atm

$v_i = -240.685 \text{ cm}^{-1}$

Temp. Correction Hv 435.9824

Entropy Correction (Hv-TSv) 239.0110

Dehydroacetic acid 45a (enantiomer of TS)

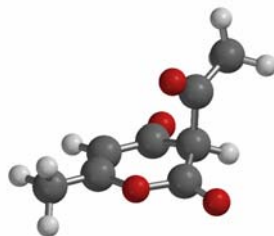

MP2/6-31G\*

MP2 total energy: **-608.7736805 hartrees**

Cartesian Coordinates (Angstroms)

| Atom    | X          | Y          | Z          |
|---------|------------|------------|------------|
| 1 C C1  | 0.1913377  | 1.5495335  | 0.3321651  |
| 2 H H2  | -0.0879847 | 2.4604243  | 0.8497768  |
| 3 C C2  | 0.0747281  | 1.4726555  | -1.0122301 |
| 4 C C3  | -0.4632142 | 2.5369509  | -1.9029444 |
| 5 H H4  | 0.2948897  | 2.8302493  | -2.6348697 |
| 6 H H5  | -0.7671053 | 3.4097605  | -1.3230173 |
| 7 H H6  | -1.3247245 | 2.1486369  | -2.4542843 |
| 8 O O1  | 0.4814927  | 0.3925596  | -1.7627453 |
| 9 C C4  | 1.0119215  | -0.7358750 | -1.1530908 |
| 10 O O2 | 1.5731371  | -1.5551042 | -1.8416248 |
| 11 C C5 | 0.6956579  | 0.4312003  | 1.1069635  |
| 12 O O3 | 0.9467073  | 0.4644030  | 2.3130184  |
| 13 C C6 | 0.7809428  | -0.8799977 | 0.3265207  |
| 14 H H1 | 1.5744732  | -1.5050390 | 0.7460373  |
| 15 C C7 | -0.5936262 | -1.5558420 | 0.5442145  |
| 16 O O4 | -1.4991036 | -1.3909196 | -0.2623428 |
| 17 C C8 | -0.7113502 | -2.3656630 | 1.8046652  |
| 18 H H3 | -0.1191644 | -3.2811161 | 1.6977977  |
| 19 H H7 | -1.7565193 | -2.6246488 | 1.9776059  |
| 20 H H8 | -0.3024954 | -1.8021682 | 2.6483845  |

Standard Thermodynamic quantities at 298.15 K and 1.00 atm  
 Temp. Correction Hv 431.4713  
 Entropy Correction (Hv-TSv) 299.2593

Standard Thermodynamic quantities at 373.00 K and 1.00 atm  
 Temp. Correction Hv 446.2317  
 Entropy Correction (Hv-TSv) 264.1137

Asynchronous dimerisation transition state 47a

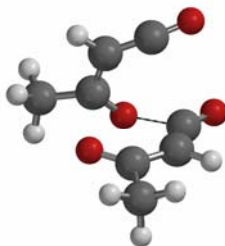

MP2/6-31G\*

MP2 total energy: -608.7004819 hartrees

Cartesian Coordinates (Angstroms)

| Atom    | X          | Y          | Z          |
|---------|------------|------------|------------|
| 1 C C1  | 1.0700874  | 1.5709346  | 0.3210897  |
| 2 H H2  | 0.7136068  | 2.4595604  | 0.8291026  |
| 3 C C2  | 0.4618023  | 1.1305461  | -0.9117680 |
| 4 C C3  | -0.4051826 | 2.1231863  | -1.6244912 |
| 5 H H5  | -1.0094368 | 1.5973082  | -2.3622655 |
| 6 H H6  | 0.2322641  | 2.8575546  | -2.1287397 |
| 7 O O1  | 0.8029785  | 0.0890276  | -1.5451182 |
| 8 C C4  | 1.3516412  | -1.3457714 | -0.6268637 |
| 9 O O2  | 2.4111875  | -1.7072543 | -1.0341386 |
| 10 C C5 | 2.0830153  | 0.9104935  | 0.8986386  |
| 11 O O3 | 3.0027838  | 0.4006626  | 1.4124047  |
| 12 C C6 | 0.3368070  | -1.6324089 | 0.2601906  |
| 13 H H1 | 0.5311878  | -2.5513746 | 0.8049256  |
| 14 C C7 | -0.9218792 | -0.9845768 | 0.4997358  |
| 15 O O4 | -1.2993594 | 0.1342742  | 0.0793291  |
| 16 C C8 | -1.8895812 | -1.7755401 | 1.3602020  |
| 17 H H3 | -2.5906883 | -1.0862091 | 1.8340065  |
| 18 H H8 | -2.4558966 | -2.4663225 | 0.7262104  |
| 19 H H4 | -1.0535580 | 2.6401899  | -0.9153293 |
| 20 H H7 | -1.3717797 | -2.3642806 | 2.1228787  |

Standard Thermodynamic quantities at 373.00 K and 1.00 atm

$v_i = -202.383 \text{ cm}^{-1}$

Temp. Correction Hv 436.7100

Entropy Correction (Hv-TSv) 245.3973

Free Energy (H-TS) (STP): 67.419 kcal/mol (T=298.15)

Dioxolane 48a

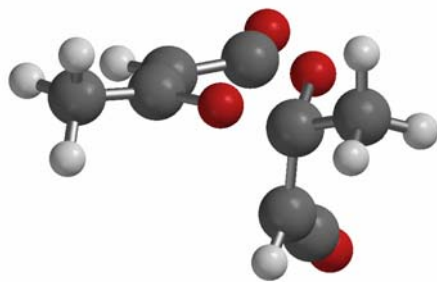

MP2/6-31G\*

MP2 total energy: **-608.7451639 hartrees**

Cartesian Coordinates (Angstroms)

| Atom    | X          | Y          | Z          |
|---------|------------|------------|------------|
| 1 C C1  | 0.8334771  | 1.3575796  | 0.6908200  |
| 2 H H2  | 0.3007942  | 1.9189942  | 1.4499802  |
| 3 C C2  | 0.1120624  | 0.8664938  | -0.5358360 |
| 4 C C3  | -0.4030392 | 1.9726955  | -1.4252264 |
| 5 H H4  | 0.4411645  | 2.5612678  | -1.7881207 |
| 6 O O1  | 0.9856637  | 0.0716425  | -1.3325328 |
| 7 C C4  | 1.3265847  | -1.1846921 | -0.8250527 |
| 8 O O2  | 2.2999136  | -1.7520514 | -1.2788521 |
| 9 C C5  | 2.1493425  | 1.2290669  | 0.7986835  |
| 10 O O3 | 3.3162799  | 1.1075207  | 0.9041823  |
| 11 C C6 | 0.3933477  | -1.7227345 | 0.1551104  |
| 12 H H1 | 0.6097024  | -2.7007237 | 0.5661707  |
| 13 C C7 | -0.7824755 | -1.1041968 | 0.3953858  |
| 14 O O4 | -1.0557683 | 0.1253084  | -0.1260336 |
| 15 C C8 | -1.9086732 | -1.6306518 | 1.2158626  |
| 16 H H3 | -2.0775524 | -0.9820986 | 2.0807413  |
| 17 H H8 | -2.8268412 | -1.6372299 | 0.6209249  |
| 18 H H6 | -0.9392906 | 1.5335597  | -2.2690765 |
| 19 H H5 | -1.0783054 | 2.6152374  | -0.8555976 |
| 20 H H7 | -1.6963869 | -2.6449878 | 1.5584667  |

Standard Thermodynamic quantities at 373.00 K and 1.00 atm  
 Temp. Correction Hv 444.6177  
 Entropy Correction (Hv-TSv) 264.3062  
 Free Energy (H-TS) (STP): 71.421 kcal/mol (T=298.15)

Dioxinone 8

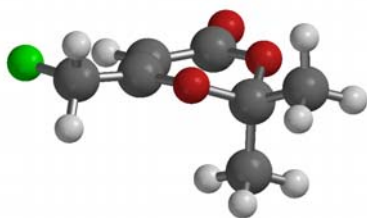

MP2/6-31G\*

MP2 total energy: **-595.9339501 hartrees**

Cartesian Coordinates (Angstroms)

| Atom     | X          | Y          | Z          |
|----------|------------|------------|------------|
| 1 C C1   | -0.0864587 | 1.3639145  | 1.2111028  |
| 2 H H2   | 0.0816819  | 2.3043422  | 1.7177013  |
| 3 C C2   | -0.2296046 | 1.3103983  | -0.1270089 |
| 4 O O1   | -0.4454343 | 0.1564746  | -0.8088311 |
| 5 C C3   | -0.1043363 | -1.0392931 | -0.0624709 |
| 6 C C4   | -0.3519006 | 0.1699438  | 2.0076969  |
| 7 O O2   | -0.6166610 | -0.9753762 | 1.2673842  |
| 8 C C5   | 1.4046593  | -1.2073339 | -0.0497006 |
| 9 H H1   | 1.8884219  | -0.3485447 | 0.4200607  |
| 10 H H5  | 1.7726921  | -1.3109937 | -1.0732432 |
| 11 H H7  | 1.6576591  | -2.1053476 | 0.5185069  |
| 12 C C6  | -0.8360652 | -2.1684843 | -0.7426320 |
| 13 H H6  | -0.5123401 | -2.2474030 | -1.7828201 |
| 14 H H8  | -1.9086107 | -1.9706292 | -0.7076195 |
| 15 H H9  | -0.6250505 | -3.1049251 | -0.2223575 |
| 16 O O3  | -0.4453800 | 0.1271080  | 3.2183994  |
| 17 C C7  | -0.1768243 | 2.4811138  | -1.0585430 |
| 18 H H4  | -1.0931844 | 2.5180776  | -1.6571283 |
| 19 H H10 | 0.6803911  | 2.3869626  | -1.7336858 |
| 20 F F1  | -0.0536548 | 3.6599955  | -0.3348112 |

Standard Thermodynamic quantities at 298.15 K and 1.00 atm  
 Temp. Correction Hv 448.0638  
 Entropy Correction (Hv-TSv) 324.5239

Standard Thermodynamic quantities at 373.00 K and 1.00 atm  
 Temp. Correction Hv 462.0454  
 Entropy Correction (Hv-TSv) 291.9367

Fragmentation transition state 42b

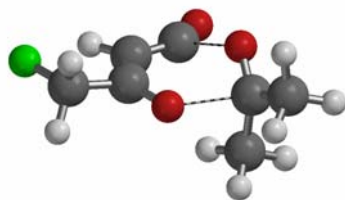

MP2/6-31G\*

MP2 total energy: **-595.8849027 hartrees**

Cartesian Coordinates (Angstroms)

| Atom     | X          | Y          | Z          |
|----------|------------|------------|------------|
| 1 C C4   | 0.4778956  | 0.3159423  | -2.8535797 |
| 2 C C1   | 0.4566295  | 0.1677552  | -1.3385363 |
| 3 C C2   | 1.6977350  | -0.1426996 | -0.7233696 |
| 4 H H2   | 2.5309256  | -0.3627586 | -1.3807325 |
| 5 C C3   | 2.0259523  | -0.2268981 | 0.6093203  |
| 6 O O1   | 2.8277561  | -0.5188287 | 1.4278342  |
| 7 O O3   | 0.6020214  | 0.6663208  | 1.4517826  |
| 8 C C5   | -0.5472440 | 0.1768784  | 1.3438356  |
| 9 O O2   | -0.6856724 | 0.3179832  | -0.8348771 |
| 10 C C6  | -0.7864316 | -1.3067045 | 1.3092687  |
| 11 H H3  | 0.0238049  | -1.8260838 | 0.7979610  |
| 12 H H5  | -1.7349496 | -1.5349470 | 0.8232341  |
| 13 H H7  | -0.8275718 | -1.6597840 | 2.3472510  |
| 14 C C7  | -1.7181638 | 1.0658416  | 1.6424213  |
| 15 H H8  | -1.4331439 | 2.1066888  | 1.4908002  |
| 16 H H9  | -2.0133216 | 0.9206457  | 2.6883815  |
| 17 H H10 | -2.5636302 | 0.8078315  | 1.0029986  |
| 18 H H1  | 0.1317159  | 1.3227739  | -3.1052680 |
| 19 H H4  | -0.2075967 | -0.4160756 | -3.2903581 |
| 20 F F1  | 1.7432892  | 0.1261185  | -3.4083677 |

Standard Thermodynamic quantities at 298.15 K and 1.00 atm

$v_i = -239.342 \text{ cm}^{-1}$

Temp. Correction Hv 438.7990

Entropy Correction (Hv-TSv) 306.4754

Standard Thermodynamic quantities at 373.00 K and 1.00 atm

$v_i = -239.349 \text{ cm}^{-1}$

Temp. Correction Hv 453.3458

Entropy Correction (Hv-TSv) 271.6118

Oxoketene 28

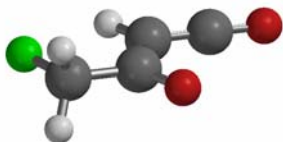

MP2/6-31G\*

MP2 total energy: **-403.3663373 hartrees**

Cartesian Coordinates (Angstroms)

| Atom    | X          | Y          | Z          |
|---------|------------|------------|------------|
| 1 C C2  | 1.8680341  | 0.3028898  | 0.0000000  |
| 2 C C1  | 0.3658057  | 0.5335644  | 0.0000000  |
| 3 O O1  | -0.0561476 | 1.6925912  | 0.0000000  |
| 4 C C3  | -0.4703950 | -0.6583008 | 0.0000000  |
| 5 C C4  | -1.7922412 | -0.4641227 | 0.0000000  |
| 6 O O2  | -2.9471102 | -0.2743338 | 0.0000000  |
| 7 H H5  | -0.0730970 | -1.6638938 | 0.0000000  |
| 8 F F1  | 2.1861967  | -1.0558613 | 0.0000000  |
| 9 H H2  | 2.2980833  | 0.7682004  | 0.8915048  |
| 10 H H4 | 2.2980833  | 0.7682004  | -0.8915048 |

Standard Thermodynamic quantities at 298.15 K and 1.00 atm  
 Temp. Correction Hv 191.5845  
 Entropy Correction (Hv-TSv) 87.4511

Standard Thermodynamic quantities at 373.00 K and 1.00 atm  
 Temp. Correction Hv 199.7667  
 Entropy Correction (Hv-TSv) 60.3811



Cycloaddition transition state 43b

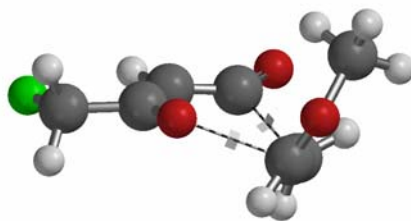

MP2/6-31G\*

MP2 total energy: **-595.8191523 hartrees**

Cartesian Coordinates (Angstroms)

| Atom     | X          | Y          | Z          |
|----------|------------|------------|------------|
| 1 C C1   | 1.5756568  | -0.3496425 | 0.0219029  |
| 2 H H4   | 2.0843951  | 1.4799672  | -0.9879464 |
| 3 C C2   | 1.2738748  | 0.9109370  | -0.5453158 |
| 4 O O1   | 0.7770716  | -1.2216945 | 0.4409963  |
| 5 C C3   | 0.0519212  | 1.5434434  | -0.6029842 |
| 6 O O2   | -0.4920536 | 2.4540175  | -1.1686239 |
| 7 C C4   | -1.2737930 | -0.3783679 | 1.1404648  |
| 8 H H8   | -0.8082205 | -0.8173361 | 2.0142991  |
| 9 C C5   | -1.2051387 | 0.9751228  | 0.8437092  |
| 10 H H5  | -0.8017700 | 1.6014892  | 1.6331084  |
| 11 H H10 | -2.0353694 | 1.4059525  | 0.2983276  |
| 12 C C6  | 3.0456634  | -0.7354427 | 0.1139097  |
| 13 H H7  | 3.2175281  | -1.6378369 | -0.4807435 |
| 14 H H9  | 3.2840018  | -0.9507890 | 1.1602195  |
| 15 O O3  | -1.9935159 | -1.2735865 | 0.4903105  |
| 16 C C7  | -2.5490082 | -0.8765871 | -0.7761464 |
| 17 H H3  | -3.3322930 | -0.1263241 | -0.6401342 |
| 18 H H11 | -2.9699437 | -1.7860604 | -1.1988290 |
| 19 H H12 | -1.7523714 | -0.4847448 | -1.4133642 |
| 20 F F1  | 3.9033648  | 0.2674829  | -0.3431600 |

Standard Thermodynamic quantities at 298.15 K and 1.00 atm

$v_i = -357.156 \text{ cm}^{-1}$

Temp. Correction Hv 440.8429

Entropy Correction (Hv-TSv) 304.7570

Standard Thermodynamic quantities at 373.00 K and 1.00 atm

$v_i = -357.156 \text{ cm}^{-1}$

Temp. Correction Hv 455.0794

Entropy Correction (Hv-TSv) 268.9864

Cycloaddition transition state 44b

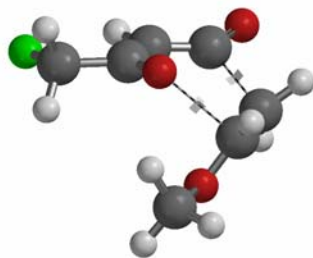

MP2/6-31G\*

MP2 total energy: **-595.8211729 hartrees**

Cartesian Coordinates (Angstroms)

| Atom     | X          | Y          | Z          |
|----------|------------|------------|------------|
| 1 C C1   | 1.0507716  | -0.4368576 | -0.7320022 |
| 2 H H4   | 2.1315115  | 1.3373170  | -1.2915840 |
| 3 C C2   | 1.1482185  | 0.8936700  | -1.1793707 |
| 4 O O1   | 0.0212240  | -1.1648250 | -0.6980765 |
| 5 C C3   | 0.1003164  | 1.7209175  | -1.5400148 |
| 6 O O2   | -0.1169050 | 2.6982145  | -2.2023837 |
| 7 C C4   | -1.6326588 | 0.2447964  | 0.1934766  |
| 8 C C5   | -1.5467224 | 1.4243633  | -0.5207177 |
| 9 H H5   | -1.3867822 | 2.3259405  | 0.0627321  |
| 10 H H10 | -2.2251161 | 1.5135060  | -1.3617688 |
| 11 C C6  | 2.3282926  | -1.1131243 | -0.2586402 |
| 12 H H7  | 2.5210761  | -1.9947859 | -0.8774936 |
| 13 H H9  | 2.1888163  | -1.4343354 | 0.7795284  |
| 14 F F1  | 3.4437947  | -0.2755011 | -0.3170567 |
| 15 O O4  | -1.1533242 | 0.1990102  | 1.4260063  |
| 16 C C8  | -1.1805269 | -1.1041473 | 2.0547623  |
| 17 H H2  | -0.6775753 | -0.9742491 | 3.0109859  |
| 18 H H1  | -0.6499255 | -1.8112186 | 1.4169473  |
| 19 H H6  | -2.2163621 | -1.4137912 | 2.2147317  |
| 20 H H11 | -2.1481233 | -0.6348999 | -0.1800616 |

Standard Thermodynamic quantities at 298.15 K and 1.00 atm

$v_i = -356.288 \text{ cm}^{-1}$

Temp. Correction Hv 440.2591

Entropy Correction (Hv-TSv) 306.4711

Standard Thermodynamic quantities at 373.00 K and 1.00 atm

$v_i = -356.288 \text{ cm}^{-1}$

Temp. Correction Hv 454.5567

Entropy Correction (Hv-TSv) 271.2699

Pyranone 29<sub>eq</sub>

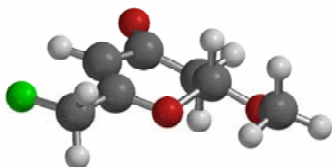

MP2/6-31G\*

MP2 total energy: **-595.8981313 hartrees**

Cartesian Coordinates (Angstroms)

| Atom     | X          | Y          | Z          |
|----------|------------|------------|------------|
| 1 C C5   | 1.8328894  | -1.7390361 | 0.0824783  |
| 2 C C1   | 0.9551006  | -0.5246691 | 0.0521011  |
| 3 C C2   | 1.3819390  | 0.7391960  | -0.1667574 |
| 4 H H2   | 2.4307109  | 0.9305364  | -0.3580072 |
| 5 C C4   | 0.4533644  | 1.8622729  | -0.0392957 |
| 6 O O2   | 0.7824361  | 3.0375599  | -0.2057562 |
| 7 C C6   | -0.9560004 | 1.4710800  | 0.3809901  |
| 8 H H7   | -1.0089200 | 1.4149405  | 1.4754207  |
| 9 C C3   | -1.3067178 | 0.1150060  | -0.1770508 |
| 10 O O1  | -0.3394450 | -0.8796109 | 0.2730322  |
| 11 H H10 | -1.6692602 | 2.2249176  | 0.0385872  |
| 12 H H1  | 1.5725602  | -2.4115201 | -0.7418726 |
| 13 H H4  | 1.6892412  | -2.2722651 | 1.0283453  |
| 14 F F1  | 3.1681967  | -1.3760360 | -0.0379676 |
| 15 H H9  | -1.2497482 | 0.1054974  | -1.2808169 |
| 16 O O3  | -2.5527250 | -0.2682453 | 0.2722610  |
| 17 C C7  | -3.0179970 | -1.4852189 | -0.3219471 |
| 18 H H3  | -2.9666497 | -1.4245899 | -1.4157915 |
| 19 H H5  | -4.0559103 | -1.5926465 | -0.0094132 |
| 20 H H6  | -2.4333929 | -2.3399607 | 0.0258505  |

Standard Thermodynamic quantities at 298.15 K and 1.00 atm  
 Temp. Correction Hv 450.3375  
 Entropy Correction (Hv-TSv) 323.5050

Standard Thermodynamic quantities at 373.00 K and 1.00 atm  
 Temp. Correction Hv 463.9787  
 Entropy Correction (Hv-TSv) 290.1294

Pyranone 29<sub>ax</sub>

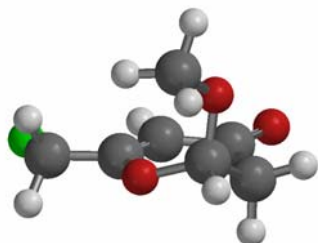

MP2/6-31G\*

MP2 total energy: **-595.9002314 hartrees**

Cartesian Coordinates (Angstroms)

| Atom     | X          | Y          | Z          |
|----------|------------|------------|------------|
| 1 C C5   | 2.2900948  | -0.9136949 | 0.2039227  |
| 2 C C1   | 0.9974147  | -0.1574262 | 0.2522416  |
| 3 C C2   | 0.7920904  | 1.0651598  | -0.2790157 |
| 4 H H2   | 1.5896233  | 1.5635542  | -0.8164824 |
| 5 C C4   | -0.4985990 | 1.7293705  | -0.1107401 |
| 6 O O2   | -0.7799567 | 2.8117766  | -0.6253851 |
| 7 C C6   | -1.4536467 | 1.0137343  | 0.8319986  |
| 8 H H7   | -1.2060806 | 1.3043888  | 1.8609247  |
| 9 C C3   | -1.3128009 | -0.4841180 | 0.6923220  |
| 10 O O1  | 0.0587726  | -0.8982848 | 0.9156973  |
| 11 O O3  | -1.7309174 | -0.8222920 | -0.5916951 |
| 12 C C7  | -1.7339040 | -2.2312385 | -0.8325651 |
| 13 H H3  | -2.3060245 | -2.7555971 | -0.0571117 |
| 14 H H5  | -0.7170811 | -2.6313911 | -0.8630378 |
| 15 H H9  | -2.2150492 | -2.3693000 | -1.8000541 |
| 16 H H6  | -1.8655866 | -1.0496894 | 1.4546993  |
| 17 H H10 | -2.4799273 | 1.3212915  | 0.6189568  |
| 18 H H1  | 2.1688367  | -1.8287829 | -0.3858831 |
| 19 H H4  | 2.5955437  | -1.1899172 | 1.2189225  |
| 20 F F1  | 3.2854068  | -0.1360976 | -0.3743171 |

Standard Thermodynamic quantities at 298.15 K and 1.00 atm  
 Temp. Correction Hv 450.7285  
 Entropy Correction (Hv-TSv) 324.2669

Standard Thermodynamic quantities at 373.00 K and 1.00 atm  
 Temp. Correction Hv 464.3112  
 Entropy Correction (Hv-TSv) 290.9919

Synchronous dimerisation transition state 46b

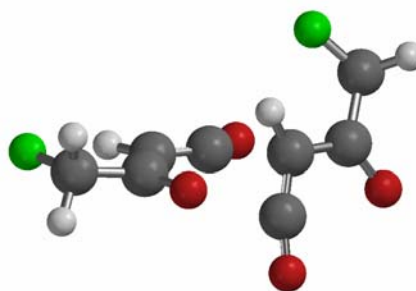

MP2/6-31G\*

MP2 total energy: **-806.7288936 hartrees**

Cartesian Coordinates (Angstroms)

| Atom     | X          | Y          | Z          |
|----------|------------|------------|------------|
| 1 C C1   | 1.0378749  | -1.6667336 | -0.1786402 |
| 2 H H4   | 2.6109120  | -0.2282480 | -0.4871875 |
| 3 C C2   | 1.5786130  | -0.3530749 | -0.1755786 |
| 4 O O5   | -0.0921429 | -2.0571659 | 0.2069704  |
| 5 C C3   | 0.9781010  | 0.8194105  | 0.1921031  |
| 6 O O2   | 1.0551712  | 1.9845539  | 0.4031161  |
| 7 C C5   | -1.1637929 | 0.3210429  | 0.3860314  |
| 8 H H10  | -1.2234515 | -0.0761823 | -0.6165760 |
| 9 C C6   | 1.9353983  | -2.7707742 | -0.7134326 |
| 10 H H7  | 2.0946503  | -3.5083205 | 0.0783641  |
| 11 H H3  | 1.4289690  | -3.2536113 | -1.5542257 |
| 12 C C7  | -1.7010242 | 1.6498499  | 0.7185656  |
| 13 O O3  | -1.9560450 | 2.0326997  | 1.8587609  |
| 14 C C9  | -1.8667606 | 2.6051585  | -0.4497508 |
| 15 H H5  | -2.9244845 | 2.8622129  | -0.5633184 |
| 16 H H12 | -1.2887002 | 3.5094414  | -0.2434443 |
| 17 C C4  | -1.1170604 | -0.5609369 | 1.4301117  |
| 18 O O4  | -1.1497540 | -1.0447711 | 2.4897002  |
| 19 F F1  | 3.1736351  | -2.2983454 | -1.1436662 |
| 20 F F2  | -1.4101086 | 2.0337941  | -1.6379033 |

Standard Thermodynamic quantities at 298.15 K and 1.00 atm

$v_i = -271.836 \text{ cm}^{-1}$

Temp. Correction Hv 386.6720

Entropy Correction (Hv-TSv) 235.3380

Standard Thermodynamic quantities at 373.00 K and 1.00 atm

$v_i = -271.836 \text{ cm}^{-1}$

Temp. Correction Hv 403.2982

Entropy Correction (Hv-TSv) 195.4626

Dehydroacetic acid 45b

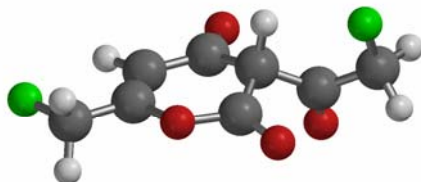

MP2/6-31G\*

MP2 total energy: **-806.7834790 hartrees**

Cartesian Coordinates (Angstroms)

| Atom    | X          | Y          | Z          |
|---------|------------|------------|------------|
| 1 C C1  | 0.2478131  | 1.5342003  | 0.3109221  |
| 2 H H2  | 0.0204794  | 2.4581582  | 0.8282538  |
| 3 C C2  | 0.0844919  | 1.4580336  | -1.0241076 |
| 4 C C3  | -0.4342414 | 2.5622528  | -1.8920637 |
| 5 H H4  | 0.3194161  | 2.8386682  | -2.6363991 |
| 6 H H6  | -1.3383872 | 2.2270801  | -2.4107885 |
| 7 O O1  | 0.3949772  | 0.3810317  | -1.8139821 |
| 8 C C4  | 0.9070084  | -0.7814906 | -1.2397709 |
| 9 O O2  | 1.3855299  | -1.6167160 | -1.9667040 |
| 10 C C5 | 0.7205515  | 0.3817074  | 1.0574196  |
| 11 O O3 | 0.9758920  | 0.3769961  | 2.2608254  |
| 12 C C6 | 0.7572152  | -0.9244124 | 0.2516501  |
| 13 H H1 | 1.5548953  | -1.5667559 | 0.6309172  |
| 14 C C7 | -0.6017237 | -1.5715409 | 0.5406832  |
| 15 O O4 | -1.5716128 | -1.4093036 | -0.1874219 |
| 16 C C8 | -0.7133242 | -2.3413340 | 1.8445956  |
| 17 H H7 | -1.4204186 | -3.1632388 | 1.7063626  |
| 18 H H8 | -1.0746856 | -1.6666168 | 2.6275967  |
| 19 F F1 | -0.7367630 | 3.6712900  | -1.1145002 |
| 20 F F2 | 0.5228867  | -2.8480094 | 2.2265117  |

Standard Thermodynamic quantities at 298.15 K and 1.00 atm  
 Temp. Correction Hv 396.5395  
 Entropy Correction (Hv-TSv) 250.7658

Standard Thermodynamic quantities at 373.00 K and 1.00 atm  
 Temp. Correction Hv 411.9838  
 Entropy Correction (Hv-TSv) 211.6514

Asynchronous transition state 47b

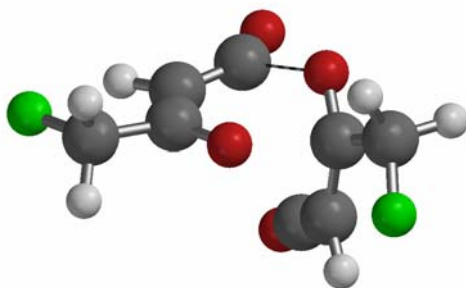

MP2/6-31G\*

MP2 total energy: **-806.7223105 hartrees**

Cartesian Coordinates (Angstroms)

| Atom    | X          | Y          | Z          |
|---------|------------|------------|------------|
| 1 C C1  | 0.9930518  | 1.5916812  | 0.3649542  |
| 2 H H2  | 0.5595250  | 2.4601529  | 0.8456519  |
| 3 C C2  | 0.4486938  | 1.1005761  | -0.8686401 |
| 4 C C3  | -0.4238586 | 2.0522779  | -1.6494976 |
| 5 H H5  | -1.2352846 | 1.4898735  | -2.1100003 |
| 6 H H6  | 0.1908360  | 2.5341541  | -2.4179466 |
| 7 O O1  | 0.8778545  | 0.1027824  | -1.5282233 |
| 8 C C4  | 1.4239289  | -1.3266361 | -0.6226151 |
| 9 O O2  | 2.4999702  | -1.6628104 | -0.9989296 |
| 10 C C5 | 2.0242429  | 0.9823791  | 0.9652216  |
| 11 O O3 | 2.9568266  | 0.5099863  | 1.4899034  |
| 12 C C6 | 0.3863289  | -1.6569418 | 0.2292958  |
| 13 H H1 | 0.5538732  | -2.5817045 | 0.7683906  |
| 14 C C7 | -0.8603043 | -1.0128959 | 0.4228778  |
| 15 O O4 | -1.2641332 | 0.1051842  | 0.0055611  |
| 16 C C8 | -1.8737634 | -1.7397554 | 1.2945370  |
| 17 H H3 | -2.1194126 | -1.1053101 | 2.1514413  |
| 18 H H8 | -2.7807090 | -1.9094989 | 0.7066010  |
| 19 F F1 | -1.4103576 | -2.9671557 | 1.7671621  |
| 20 F F2 | -0.9473083 | 3.0336611  | -0.8157451 |

Standard Thermodynamic quantities at 298.15 K and 1.00 atm

$v_i = -266.263 \text{ cm}^{-1}$

Temp. Correction Hv 387.1214

Entropy Correction (Hv-TSv) 238.3678

Standard Thermodynamic quantities at 373.00 K and 1.00 atm

$v_i = -266.260 \text{ cm}^{-1}$

Temp. Correction Hv 403.6477

Entropy Correction (Hv-TSv) 199.1529

# Dioxolane 48b

SPARTAN '06 Quantum Mechanics Program:

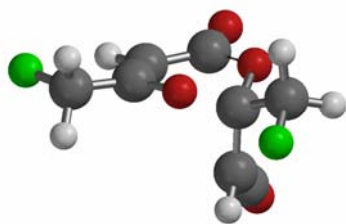

MP2/6-31G\*

MP2 total energy: **-806.7615399 hartrees**

Cartesian Coordinates (Angstroms)

| Atom    | X          | Y          | Z          |
|---------|------------|------------|------------|
| 1 C C1  | 0.8033024  | 1.4225714  | 0.6629868  |
| 2 H H2  | 0.2784362  | 2.1124626  | 1.3125748  |
| 3 C C2  | 0.1169202  | 0.8770582  | -0.5502291 |
| 4 C C3  | -0.4072565 | 1.9708020  | -1.4609669 |
| 5 H H4  | 0.4376908  | 2.5167144  | -1.8862871 |
| 6 O O1  | 0.9875287  | 0.1029879  | -1.3561558 |
| 7 C C4  | 1.3356327  | -1.1731687 | -0.8782779 |
| 8 O O2  | 2.2981322  | -1.7258463 | -1.3646027 |
| 9 C C5  | 2.0783134  | 1.1446521  | 0.9001018  |
| 10 O O3 | 3.2094805  | 0.8964581  | 1.1106316  |
| 11 C C6 | 0.4214180  | -1.7199686 | 0.1146928  |
| 12 H H1 | 0.6325185  | -2.6946280 | 0.5329065  |
| 13 C C7 | -0.7459318 | -1.0945585 | 0.3608161  |
| 14 O O4 | -1.0521299 | 0.1253208  | -0.1517924 |
| 15 C C8 | -1.8541068 | -1.6171304 | 1.2191505  |
| 16 H H3 | -1.9659452 | -0.9860797 | 2.1073116  |
| 17 H H8 | -2.7945992 | -1.6067714 | 0.6582580  |
| 18 F F1 | -1.5707236 | -2.9162098 | 1.6189699  |
| 19 H H6 | -1.0216868 | 1.5286705  | -2.2491038 |
| 20 F F2 | -1.1869936 | 2.8366634  | -0.7009848 |

Standard Thermodynamic quantities at 373.00 K and 1.00 atm  
Temp. Correction Hv 410.8506  
Entropy Correction (Hv-TSv) 214.2522  
Free Energy (H-TS) (STP): 60.209 kcal/mol (T=298.15)



### Dioxinone 3

MP2/ 6-311+G\*\*

MP2 total energy: **-497.2224130 hartrees**

Cartesian Coordinates (Angstroms)

| Atom     | X          | Y          | Z          |
|----------|------------|------------|------------|
| 1 C C1   | -0.0621446 | 1.3692611  | 1.2010052  |
| 2 H H2   | 0.1294520  | 2.3017636  | 1.7156456  |
| 3 C C2   | -0.2161975 | 1.3293754  | -0.1439575 |
| 4 O O1   | -0.4490104 | 0.1656566  | -0.7960013 |
| 5 C C3   | -0.1175724 | -1.0197051 | -0.0452948 |
| 6 C C4   | -0.3372707 | 0.1827110  | 2.0094424  |
| 7 O O2   | -0.6420899 | -0.9493993 | 1.2765953  |
| 8 C C5   | 1.3941572  | -1.1976474 | -0.0172521 |
| 9 H H1   | 1.8864642  | -0.3402274 | 0.4471874  |
| 10 H H5  | 1.7652840  | -1.3146914 | -1.0384757 |
| 11 H H7  | 1.6337248  | -2.0945300 | 0.5592702  |
| 12 C C6  | -0.8398696 | -2.1569862 | -0.7280130 |
| 13 H H6  | -0.5063533 | -2.2342630 | -1.7655053 |
| 14 H H8  | -1.9147890 | -1.9685804 | -0.7029714 |
| 15 H H9  | -0.6241319 | -3.0909201 | -0.2044758 |
| 16 O O3  | -0.4059206 | 0.1471356  | 3.2155377  |
| 17 C C7  | -0.1771183 | 2.5022310  | -1.0654522 |
| 18 H H3  | 0.6424670  | 2.3885154  | -1.7815833 |
| 19 H H4  | -0.0467273 | 3.4288715  | -0.5041410 |
| 20 H H10 | -1.1123537 | 2.5514291  | -1.6315606 |

Standard Thermodynamic quantities at 298.15 K and 1.00 atm  
Temp. Correction Hv 459.2348  
Entropy Correction (Hv-TSv) 341.1715

# Fragmentation transition state 42a

MP2/6-311+G\*\*

MP2 total energy: **-497.1729745 hartrees**

Cartesian Coordinates (Angstroms)

| Atom     | X          | Y          | Z          |
|----------|------------|------------|------------|
| 1 C C4   | 2.8118539  | 1.2110076  | 0.0374335  |
| 2 C C1   | 1.4195750  | 0.6103594  | -0.0242537 |
| 3 C C2   | 1.3807569  | -0.8239833 | -0.0983218 |
| 4 H H2   | 2.3206029  | -1.3400490 | -0.2674335 |
| 5 C C3   | 0.3298503  | -1.7072994 | 0.0127484  |
| 6 O O1   | -0.0556398 | -2.8135035 | -0.0635766 |
| 7 O O3   | -1.0322257 | -0.6495778 | 0.7357535  |
| 8 C C5   | -1.4349007 | 0.3187618  | 0.0595722  |
| 9 O O2   | 0.4490359  | 1.3960800  | -0.0061921 |
| 10 C C6  | -1.5154204 | 0.2726303  | -1.4436913 |
| 11 H H3  | -0.7173021 | -0.3348189 | -1.8710916 |
| 12 H H5  | -1.4768212 | 1.2795817  | -1.8598795 |
| 13 H H7  | -2.4807339 | -0.1807697 | -1.7036070 |
| 14 C C7  | -2.2131772 | 1.3996321  | 0.7539328  |
| 15 H H8  | -1.9988507 | 1.3844255  | 1.8225429  |
| 16 H H9  | -3.2818698 | 1.2138439  | 0.5916995  |
| 17 H H10 | -1.9608728 | 2.3725217  | 0.3287208  |
| 18 H H1  | 3.0792653  | 1.3557581  | 1.0896294  |
| 19 H H4  | 2.8079876  | 2.1857657  | -0.4532728 |
| 20 H H6  | 3.5605348  | 0.5610762  | -0.4209431 |

Standard Thermodynamic quantities at 298.15 K and 1.00 atm

$v_i = -247.564 \text{ cm}^{-1}$

Temp. Correction Hv 449.3776

Entropy Correction (Hv-TSv) 321.5328

**Oxoketene 4**

MP2/6-311+G\*\*

MP2 total energy: **-304.5253886 hartrees**

Cartesian Coordinates (Angstroms)

| Atom    | X          | Y          | Z          |
|---------|------------|------------|------------|
| 1 C C2  | 2.2288188  | -0.4472373 | -0.0001612 |
| 2 C C1  | 0.8460005  | 0.1705062  | -0.0000532 |
| 3 O O1  | 0.6648335  | 1.3821172  | 0.0001511  |
| 4 C C3  | -0.2649264 | -0.7996120 | 0.0001189  |
| 5 C C4  | -1.5116902 | -0.3177855 | -0.0000239 |
| 6 O O2  | -2.5836013 | 0.1243661  | -0.0001243 |
| 7 H H5  | -0.1272760 | -1.8730703 | 0.0008342  |
| 8 H H1  | 2.3556681  | -1.0770455 | 0.8859622  |
| 9 H H2  | 2.9786435  | 0.3441246  | -0.0026609 |
| 10 H H4 | 2.3538895  | -1.0811037 | -0.8836335 |

Standard Thermodynamic quantities at 298.15 K and 1.00 atm  
Temp. Correction Hv 205.6503  
Entropy Correction (Hv-TSv) 104.9709

# Acetone

MP2/6-311+G\*\*

MP2 total energy: **-192.6552796 hartrees**

|       |      | Cartesian Coordinates (Angstroms) |            |            |
|-------|------|-----------------------------------|------------|------------|
| Atom  |      | X                                 | Y          | Z          |
| ----- |      | -----                             | -----      | -----      |
| 1     | C C1 | 0.0000000                         | 0.0000000  | 0.1855266  |
| 2     | O O1 | 0.0000000                         | 0.0000000  | 1.4052049  |
| 3     | C C2 | -1.2862571                        | 0.0000000  | -0.6168492 |
| 4     | H H2 | -1.3199073                        | -0.8815650 | -1.2652397 |
| 5     | H H1 | -1.3199073                        | 0.8815650  | -1.2652397 |
| 6     | H H4 | -2.1454104                        | 0.0000000  | 0.0541748  |
| 7     | C C3 | 1.2862571                         | 0.0000000  | -0.6168492 |
| 8     | H H3 | 1.3199073                         | -0.8815650 | -1.2652397 |
| 9     | H H5 | 2.1454104                         | 0.0000000  | 0.0541748  |
| 10    | H H6 | 1.3199073                         | 0.8815650  | -1.2652397 |

Standard Thermodynamic quantities at 298.15 K and 1.00 atm  
Temp. Correction Hv 235.8111  
Entropy Correction (Hv-TSv) 152.4852

# Cycloaddition transition state 43a

MP2/6-311+G\*\*

MP2 total energy: **-497.1121046 hartrees**

Cartesian Coordinates (Angstroms)

| Atom     | X          | Y          | Z          |
|----------|------------|------------|------------|
| 1 C C1   | 1.0555105  | -0.4518301 | -0.7541453 |
| 2 H H4   | 2.1323792  | 1.3585376  | -1.2746110 |
| 3 C C2   | 1.1518203  | 0.9027215  | -1.1715974 |
| 4 O O1   | 0.0030860  | -1.1335247 | -0.7614509 |
| 5 C C3   | 0.1140750  | 1.7610104  | -1.5050331 |
| 6 O O2   | -0.0861850 | 2.7557014  | -2.1319224 |
| 7 C C4   | -1.6140877 | 0.2476598  | 0.1952597  |
| 8 C C5   | -1.5321956 | 1.4301555  | -0.5222614 |
| 9 H H5   | -1.3825673 | 2.3312040  | 0.0649177  |
| 10 H H10 | -2.2012761 | 1.5029922  | -1.3725387 |
| 11 C C6  | 2.3337511  | -1.1146959 | -0.2710174 |
| 12 H H7  | 2.4095308  | -2.1138760 | -0.7080708 |
| 13 H H9  | 2.2793237  | -1.2266590 | 0.8183909  |
| 14 O O4  | -1.1366942 | 0.2021304  | 1.4206606  |
| 15 C C8  | -1.1540064 | -1.0962340 | 2.0464585  |
| 16 H H2  | -0.7894695 | -0.9393653 | 3.0599113  |
| 17 H H1  | -0.5004127 | -1.7679778 | 1.4876880  |
| 18 H H6  | -2.1765123 | -1.4820947 | 2.0707079  |
| 19 H H11 | -2.1320958 | -0.6322604 | -0.1738670 |
| 20 H H3  | 3.2260257  | -0.5335948 | -0.5174792 |

Standard Thermodynamic quantities at 298.15 K and 1.00 atm

$v_i = -355.611 \text{ cm}^{-1}$

Temp. Correction Hv 451.7144

Entropy Correction (Hv-TSv) 323.2223

# Cycloaddition transition state 44a

MP2/6-311+G\*\*

MP2 total energy: **-497.1099087 hartrees**

Cartesian Coordinates (Angstroms)

| Atom     | X          | Y          | Z          |
|----------|------------|------------|------------|
| 1 C C1   | 1.5828933  | -0.3730795 | 0.0093409  |
| 2 H H4   | 2.0380451  | 1.4197010  | -1.1235915 |
| 3 C C2   | 1.2458980  | 0.8632024  | -0.6289277 |
| 4 O O1   | 0.7667807  | -1.2007627 | 0.4585304  |
| 5 C C3   | 0.0364127  | 1.5250478  | -0.6743337 |
| 6 O O2   | -0.5030013 | 2.4264914  | -1.2417627 |
| 7 C C4   | -1.2627917 | -0.3460796 | 1.1595062  |
| 8 H H8   | -0.7900380 | -0.7416321 | 2.0503475  |
| 9 C C5   | -1.1969675 | 0.9970413  | 0.8035817  |
| 10 H H5  | -0.7816195 | 1.6524290  | 1.5620983  |
| 11 H H10 | -2.0346956 | 1.3948505  | 0.2459025  |
| 12 C C6  | 3.0671344  | -0.6709405 | 0.1341647  |
| 13 H H6  | 3.4413091  | -0.2328367 | 1.0665321  |
| 14 H H7  | 3.6361010  | -0.2429347 | -0.6953766 |
| 15 H H9  | 3.2177583  | -1.7515147 | 0.1734335  |
| 16 O O3  | -1.9897633 | -1.2595712 | 0.5581166  |
| 17 C C7  | -2.5208243 | -0.9147492 | -0.7274986 |
| 18 H H3  | -3.2821054 | -0.1348908 | -0.6409112 |
| 19 H H11 | -2.9649681 | -1.8296103 | -1.1135270 |
| 20 H H12 | -1.7055580 | -0.5801616 | -1.3756253 |

Standard Thermodynamic quantities at 298.15 K and 1.00 atm

$v_i = -345.015 \text{ cm}^{-1}$

Temp. Correction Hv 451.9646

Entropy Correction (Hv-TSv) 321.4491

# Methyl vinyl ether

MP2/6-311+G\*\*

MP2 total energy: **-192.6089817 hartrees**

Cartesian Coordinates (Angstroms)

|    | Atom | X          | Y          | Z          |
|----|------|------------|------------|------------|
| 1  | C C1 | 1.3608999  | -0.4879982 | 0.0000077  |
| 2  | H H2 | 2.4410192  | -0.5588686 | 0.0000275  |
| 3  | H H3 | 0.7891257  | -1.4061548 | -0.0000039 |
| 4  | C C2 | 0.8098898  | 0.7384488  | -0.0000079 |
| 5  | H H4 | 1.4154429  | 1.6394580  | -0.0000015 |
| 6  | O O1 | -0.5066640 | 1.0606663  | -0.0000205 |
| 7  | C C3 | -1.3994074 | -0.0434944 | -0.0000038 |
| 8  | H H1 | -1.2535562 | -0.6602534 | -0.8937787 |
| 9  | H H5 | -2.4032443 | 0.3784657  | 0.0000294  |
| 10 | H H6 | -1.2535056 | -0.6602694 | 0.8937516  |

Standard Thermodynamic quantities at 298.15 K and 1.00 atm  
Temp. Correction Hv 240.6107  
Entropy Correction (Hv-TSv) 155.6146

Pyranone 5<sub>eq</sub>

MP2/6-311+G\*\*

MP2 total energy: **-497.1886467 hartrees**

Cartesian Coordinates (Angstroms)

| Atom     | X          | Y          | Z          |
|----------|------------|------------|------------|
| 1 C C5   | -0.8042624 | -2.7691679 | -0.0649960 |
| 2 C C1   | -0.7061433 | -1.2783583 | -0.0297191 |
| 3 C C2   | -1.7460715 | -0.4312346 | 0.1983621  |
| 4 H H2   | -2.7307684 | -0.8316994 | 0.4124430  |
| 5 C C4   | -1.5945957 | 1.0163923  | 0.0454300  |
| 6 O O2   | -2.5084521 | 1.8162213  | 0.2117669  |
| 7 C C6   | -0.2074276 | 1.4490234  | -0.4080151 |
| 8 H H7   | -0.1598335 | 1.4014959  | -1.5029760 |
| 9 C C3   | 0.8258361  | 0.5080616  | 0.1597308  |
| 10 O O1  | 0.5591321  | -0.8524026 | -0.2642936 |
| 11 H H10 | -0.0106482 | 2.4739985  | -0.0864591 |
| 12 H H1  | -0.1819018 | -3.2040135 | 0.7231564  |
| 13 H H4  | -0.4301584 | -3.1350892 | -1.0261997 |
| 14 H H9  | 0.7805636  | 0.4877700  | 1.2635493  |
| 15 O O3  | 2.0806123  | 0.8556816  | -0.2861065 |
| 16 C C7  | 3.1215744  | 0.1010752  | 0.3331818  |
| 17 H H3  | 3.0560614  | 0.1834138  | 1.4254526  |
| 18 H H5  | 4.0591569  | 0.5369596  | -0.0102569 |
| 19 H H6  | 3.0716018  | -0.9505939 | 0.0402894  |
| 20 H H8  | -1.8378710 | -3.0929954 | 0.0662195  |

Standard Thermodynamic quantities at 298.15 K and 1.00 atm  
Temp. Correction Hv 462.6005  
Entropy Correction (Hv-TSv) 342.0134



**Pyranone 5<sub>ax</sub>**

MP2/6-311+G\*\*

MP2 total energy: **-497.1895365 hartrees**

Cartesian Coordinates (Angstroms)

| Atom     | X          | Y          | Z          |
|----------|------------|------------|------------|
| 1 C C5   | 0.4851359  | -2.7717899 | 0.1032423  |
| 2 C C1   | -0.0324249 | -1.3809015 | -0.0699047 |
| 3 C C2   | -1.2036352 | -0.9151055 | 0.4324584  |
| 4 H H2   | -1.8230556 | -1.5603019 | 1.0457467  |
| 5 C C4   | -1.6749542 | 0.4351208  | 0.1283002  |
| 6 O O2   | -2.7009701 | 0.9180688  | 0.5917545  |
| 7 C C6   | -0.8243998 | 1.1687692  | -0.8979684 |
| 8 H H7   | -1.1600256 | 0.8574953  | -1.8948630 |
| 9 C C3   | 0.6337012  | 0.8022696  | -0.7336472 |
| 10 O O1  | 0.8256133  | -0.6242565 | -0.8118297 |
| 11 O O3  | 1.0533611  | 1.2959124  | 0.4968953  |
| 12 C C7  | 2.4460658  | 1.1101078  | 0.7301853  |
| 13 H H3  | 3.0350462  | 1.5356460  | -0.0925684 |
| 14 H H5  | 2.6917229  | 0.0497174  | 0.8399575  |
| 15 H H9  | 2.6747560  | 1.6388539  | 1.6551307  |
| 16 H H6  | 1.2668589  | 1.1804204  | -1.5461983 |
| 17 H H10 | -0.9600190 | 2.2472478  | -0.7956113 |
| 18 H H1  | -0.2338454 | -3.3864672 | 0.6472943  |
| 19 H H4  | 1.4339241  | -2.7531436 | 0.6487341  |
| 20 H H8  | 0.6736704  | -3.2180890 | -0.8781782 |

Standard Thermodynamic quantities at 298.15 K and 1.00 atm  
Temp. Correction Hv 462.6987  
Entropy Correction (Hv-TSv) 342.2853

**Calculations for the pyranones were not yet optimised with this basis set**  
**090808\_100**  
**090808\_90**

# Dioxinone 8

MP2/6-311+G\*\*

MP2 total energy: **-596.2903687 hartrees**

Cartesian Coordinates (Angstroms)

| Atom     | X          | Y          | Z          |
|----------|------------|------------|------------|
| 1 C C1   | -0.0722326 | 1.3589651  | 1.2136406  |
| 2 H H2   | 0.1172221  | 2.2946923  | 1.7213181  |
| 3 C C2   | -0.2292991 | 1.3103044  | -0.1262000 |
| 4 O O1   | -0.4623280 | 0.1630215  | -0.7999910 |
| 5 C C3   | -0.1199216 | -1.0304550 | -0.0585022 |
| 6 C C4   | -0.3382245 | 0.1594617  | 2.0090407  |
| 7 O O2   | -0.6431135 | -0.9661454 | 1.2622656  |
| 8 C C5   | 1.3926149  | -1.1981914 | -0.0366870 |
| 9 H H1   | 1.8835151  | -0.3424631 | 0.4323226  |
| 10 H H5  | 1.7619296  | -1.3085597 | -1.0592939 |
| 11 H H7  | 1.6378000  | -2.0972110 | 0.5340075  |
| 12 C C6  | -0.8384416 | -2.1650324 | -0.7487907 |
| 13 H H6  | -0.5083825 | -2.2312276 | -1.7881546 |
| 14 H H8  | -1.9144324 | -1.9842038 | -0.7169702 |
| 15 H H9  | -0.6139349 | -3.1019828 | -0.2345733 |
| 16 O O3  | -0.3993122 | 0.1076267  | 3.2136113  |
| 17 C C7  | -0.1767724 | 2.4789799  | -1.0638702 |
| 18 H H4  | -1.0769064 | 2.4850817  | -1.6859872 |
| 19 H H10 | 0.7058022  | 2.4008895  | -1.7065180 |
| 20 F F1  | -0.1055820 | 3.6664495  | -0.3606682 |

Standard Thermodynamic quantities at 298.15 K and 1.00 atm  
Temp. Correction Hv 442.4806  
Entropy Correction (Hv-TSv) 318.3891

# Fragmentation transition state 42b

MP2/6-311+G\*\*

MP2 total energy: **-596.2449402 hartrees**

Cartesian Coordinates (Angstroms)

| Atom     | X          | Y          | Z          |
|----------|------------|------------|------------|
| 1 C C4   | 0.4700202  | 0.2930837  | -2.8585370 |
| 2 C C1   | 0.4534200  | 0.1777308  | -1.3380299 |
| 3 C C2   | 1.6873822  | -0.1440005 | -0.7106270 |
| 4 H H2   | 2.5260816  | -0.3885595 | -1.3523956 |
| 5 C C3   | 1.9998663  | -0.2010954 | 0.6345676  |
| 6 O O1   | 2.7985265  | -0.4918043 | 1.4445966  |
| 7 O O3   | 0.6111546  | 0.6821773  | 1.4373527  |
| 8 C C5   | -0.5333492 | 0.1907479  | 1.3358260  |
| 9 O O2   | -0.6768734 | 0.3551013  | -0.8294245 |
| 10 C C6  | -0.7704850 | -1.2938589 | 1.2794101  |
| 11 H H3  | 0.0344785  | -1.8135409 | 0.7592843  |
| 12 H H5  | -1.7234704 | -1.5095826 | 0.7962009  |
| 13 H H7  | -0.8098474 | -1.6542951 | 2.3155213  |
| 14 C C7  | -1.7094878 | 1.0643500  | 1.6589986  |
| 15 H H8  | -1.4220097 | 2.1141800  | 1.6013278  |
| 16 H H9  | -2.0451794 | 0.8295601  | 2.6765078  |
| 17 H H10 | -2.5268853 | 0.8537560  | 0.9668599  |
| 18 H H1  | 0.1286340  | 1.2962523  | -3.1265717 |
| 19 H H4  | -0.2161786 | -0.4500025 | -3.2727223 |
| 20 F F1  | 1.7242015  | 0.0898001  | -3.4181453 |

Standard Thermodynamic quantities at 298.15 K and 1.00 atm  
Temp. Correction Hv 433.2235  
Entropy Correction (Hv-TSv) 301.3985

**Oxoketene 28**

MP2/6-311+G\*\*

MP2 total energy: **-403.5970663 hartrees**

Cartesian Coordinates (Angstroms)

| Atom    | X          | Y          | Z          |
|---------|------------|------------|------------|
| 1 C C2  | 1.8704839  | 0.2937357  | 0.0000000  |
| 2 C C1  | 0.3657702  | 0.5357792  | 0.0000000  |
| 3 O O1  | -0.0394777 | 1.6922725  | 0.0000000  |
| 4 C C3  | -0.4821446 | -0.6523079 | 0.0000000  |
| 5 C C4  | -1.8063729 | -0.4598518 | 0.0000000  |
| 6 O O2  | -2.9488961 | -0.2718587 | 0.0000000  |
| 7 H H5  | -0.0953041 | -1.6619569 | 0.0000000  |
| 8 F F1  | 2.1911892  | -1.0573277 | 0.0000000  |
| 9 H H2  | 2.2975860  | 0.7552322  | 0.8935986  |
| 10 H H4 | 2.2975860  | 0.7552322  | -0.8935986 |

Standard Thermodynamic quantities at 298.15 K and 1.00 atm  
Temp. Correction Hv 189.5611  
Entropy Correction (Hv-TSv) 84.6790

### Cycloaddition transition state 43b

MP2/6-311+G\*\*

MP2 total energy: **-596.1827108 hartrees**

Cartesian Coordinates (Angstroms)

|    | Atom  | X          | Y          | Z          |
|----|-------|------------|------------|------------|
| 1  | C C1  | 1.5552874  | -0.3418463 | -0.0216285 |
| 2  | H H4  | 2.1104464  | 1.5394424  | -0.9179039 |
| 3  | C C2  | 1.2839350  | 0.9526255  | -0.5298155 |
| 4  | O O1  | 0.7292496  | -1.2102428 | 0.3295087  |
| 5  | C C3  | 0.0702763  | 1.6143021  | -0.5684491 |
| 6  | O O2  | -0.4412587 | 2.5598231  | -1.0837572 |
| 7  | C C4  | -1.2626895 | -0.3649478 | 1.1396845  |
| 8  | H H8  | -0.7818688 | -0.7644105 | 2.0251071  |
| 9  | C C5  | -1.2133715 | 0.9862046  | 0.8034254  |
| 10 | H H5  | -0.8442676 | 1.6355743  | 1.5911025  |
| 11 | H H10 | -2.0477857 | 1.3736819  | 0.2319018  |
| 12 | C C6  | 3.0170770  | -0.7625871 | 0.0930593  |
| 13 | H H7  | 3.1784389  | -1.6496985 | -0.5251155 |
| 14 | H H9  | 3.2245425  | -1.0053904 | 1.1390279  |
| 15 | O O3  | -1.9837780 | -1.2772153 | 0.5339301  |
| 16 | C C7  | -2.5268639 | -0.9271863 | -0.7461711 |
| 17 | H H3  | -3.3050558 | -0.1659673 | -0.6452702 |
| 18 | H H11 | -2.9518535 | -1.8469195 | -1.1421106 |
| 19 | H H12 | -1.7207102 | -0.5675919 | -1.3919187 |
| 20 | F F1  | 3.9102501  | 0.2223499  | -0.3146072 |

Standard Thermodynamic quantities at 298.15 K and 1.00 atm

$v_i = -351.240 \text{ cm}^{-1}$

Temp. Correction Hv 435.6449

Entropy Correction (Hv-TSv) 300.2351

# Cycloaddition transition state 44b

MP2/6-311+G\*\*

MP2 total energy: **-596.1848591 hartrees**

Cartesian Coordinates (Angstroms)

| Atom     | X          | Y          | Z          |
|----------|------------|------------|------------|
| 1 C C1   | 1.0455226  | -0.4331275 | -0.7504738 |
| 2 H H4   | 2.1246891  | 1.3675964  | -1.2513305 |
| 3 C C2   | 1.1452329  | 0.9077342  | -1.1715924 |
| 4 O O1   | 0.0157669  | -1.1524524 | -0.7475672 |
| 5 C C3   | 0.0876310  | 1.7356624  | -1.5303874 |
| 6 O O2   | -0.1233167 | 2.7049404  | -2.1906484 |
| 7 C C4   | -1.6124381 | 0.2344866  | 0.1972893  |
| 8 C C5   | -1.5350704 | 1.4101371  | -0.5360405 |
| 9 H H5   | -1.3907494 | 2.3167314  | 0.0449129  |
| 10 H H10 | -2.2171399 | 1.4726492  | -1.3773396 |
| 11 C C6  | 2.3137669  | -1.1266507 | -0.2695045 |
| 12 H H7  | 2.5202421  | -1.9813593 | -0.9191587 |
| 13 H H9  | 2.1472846  | -1.4809583 | 0.7527859  |
| 14 F F1  | 3.4303142  | -0.2979778 | -0.2679120 |
| 15 O O4  | -1.1280841 | 0.2026848  | 1.4179759  |
| 16 C C8  | -1.1690451 | -1.0854010 | 2.0664495  |
| 17 H H2  | -0.6962190 | -0.9423890 | 3.0362069  |
| 18 H H1  | -0.6190392 | -1.8060570 | 1.4593331  |
| 19 H H6  | -2.2082231 | -1.3963096 | 2.1977587  |
| 20 H H11 | -2.1311255 | -0.6499399 | -0.1607570 |

Standard Thermodynamic quantities at 298.15 K and 1.00 atm

$v_i = -361.683 \text{ cm}^{-1}$

Temp. Correction Hv 435.4628

Entropy Correction (Hv-TSv) 301.7969

Pyranone 29<sub>eq</sub>

MP2/6-311+G\*\*

MP2 total energy: **-596.2571027 hartrees**

Cartesian Coordinates (Angstroms)

| Atom     | X          | Y          | Z          |
|----------|------------|------------|------------|
| 1 C C5   | 1.8438912  | -1.7256324 | 0.0651685  |
| 2 C C1   | 0.9564950  | -0.5148288 | 0.0421758  |
| 3 C C2   | 1.3696354  | 0.7557755  | -0.1855188 |
| 4 H H2   | 2.4145364  | 0.9533884  | -0.3920629 |
| 5 C C4   | 0.4319606  | 1.8739653  | -0.0435557 |
| 6 O O2   | 0.7445107  | 3.0451510  | -0.2169740 |
| 7 C C6   | -0.9653667 | 1.4625296  | 0.4015847  |
| 8 H H7   | -0.9861107 | 1.4023979  | 1.4968093  |
| 9 C C3   | -1.3053815 | 0.1037686  | -0.1603903 |
| 10 O O1  | -0.3254828 | -0.8781572 | 0.2774448  |
| 11 H H10 | -1.6957267 | 2.2047368  | 0.0722671  |
| 12 H H1  | 1.6093449  | -2.3747262 | -0.7842648 |
| 13 H H4  | 1.6777885  | -2.2765133 | 0.9960096  |
| 14 F F1  | 3.1762623  | -1.3653584 | -0.0116771 |
| 15 H H9  | -1.2492248 | 0.1012074  | -1.2635011 |
| 16 O O3  | -2.5408393 | -0.2992649 | 0.2847404  |
| 17 C C7  | -2.9972521 | -1.5002376 | -0.3380167 |
| 18 H H3  | -2.9885314 | -1.3920709 | -1.4297314 |
| 19 H H5  | -4.0196546 | -1.6515694 | 0.0061238  |
| 20 H H6  | -2.3781816 | -2.3524991 | -0.0469301 |

Standard Thermodynamic quantities at 298.15 K and 1.00 atm  
Temp. Correction Hv 445.8725  
Entropy Correction (Hv-TSv) 319.1865

**Pyranone 29<sub>ax</sub>**

MP2/6-311+G\*\*

MP2 total energy: **-596.2580563 hartrees**

Cartesian Coordinates (Angstroms)

| Atom     | X          | Y          | Z          |
|----------|------------|------------|------------|
| 1 C C5   | 2.2814999  | -0.9437949 | 0.1827683  |
| 2 C C1   | 0.9976278  | -0.1679644 | 0.2361041  |
| 3 C C2   | 0.8016472  | 1.0589390  | -0.2971906 |
| 4 H H2   | 1.6043116  | 1.5475820  | -0.8362564 |
| 5 C C4   | -0.4792500 | 1.7446640  | -0.1125379 |
| 6 O O2   | -0.7450317 | 2.8306314  | -0.6104301 |
| 7 C C6   | -1.4353756 | 1.0295426  | 0.8322998  |
| 8 H H7   | -1.1654917 | 1.3114657  | 1.8575214  |
| 9 C C3   | -1.3082471 | -0.4709832 | 0.6859076  |
| 10 O O1  | 0.0578968  | -0.8946113 | 0.8987841  |
| 11 O O3  | -1.7409357 | -0.8093028 | -0.5885491 |
| 12 C C7  | -1.7997046 | -2.2160289 | -0.8088467 |
| 13 H H3  | -2.4182837 | -2.7001607 | -0.0425135 |
| 14 H H5  | -0.8000848 | -2.6604429 | -0.8020978 |
| 15 H H9  | -2.2563544 | -2.3534010 | -1.7884186 |
| 16 H H6  | -1.8589234 | -1.0282289 | 1.4538490  |
| 17 H H10 | -2.4618281 | 1.3442791  | 0.6340496  |
| 18 H H1  | 2.1527623  | -1.8326202 | -0.4430451 |
| 19 H H4  | 2.5611716  | -1.2541141 | 1.1942650  |
| 20 F F1  | 3.3020111  | -0.1771492 | -0.3485357 |

Standard Thermodynamic quantities at 298.15 K and 1.00 atm  
Temp. Correction Hv 446.0419  
Entropy Correction (Hv-TSv) 319.5682



Characterisation spectra for **1, 6, 8, 11, 17, 19, 22, 27, 29, 30a and 30b, 31, 33, 35, 40, 41 and 43**

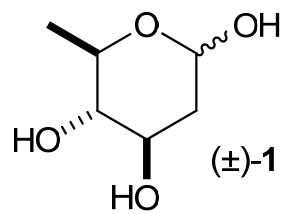

<sup>1</sup>H NMR Spectrum  
300 MHz, CD<sub>3</sub>OD

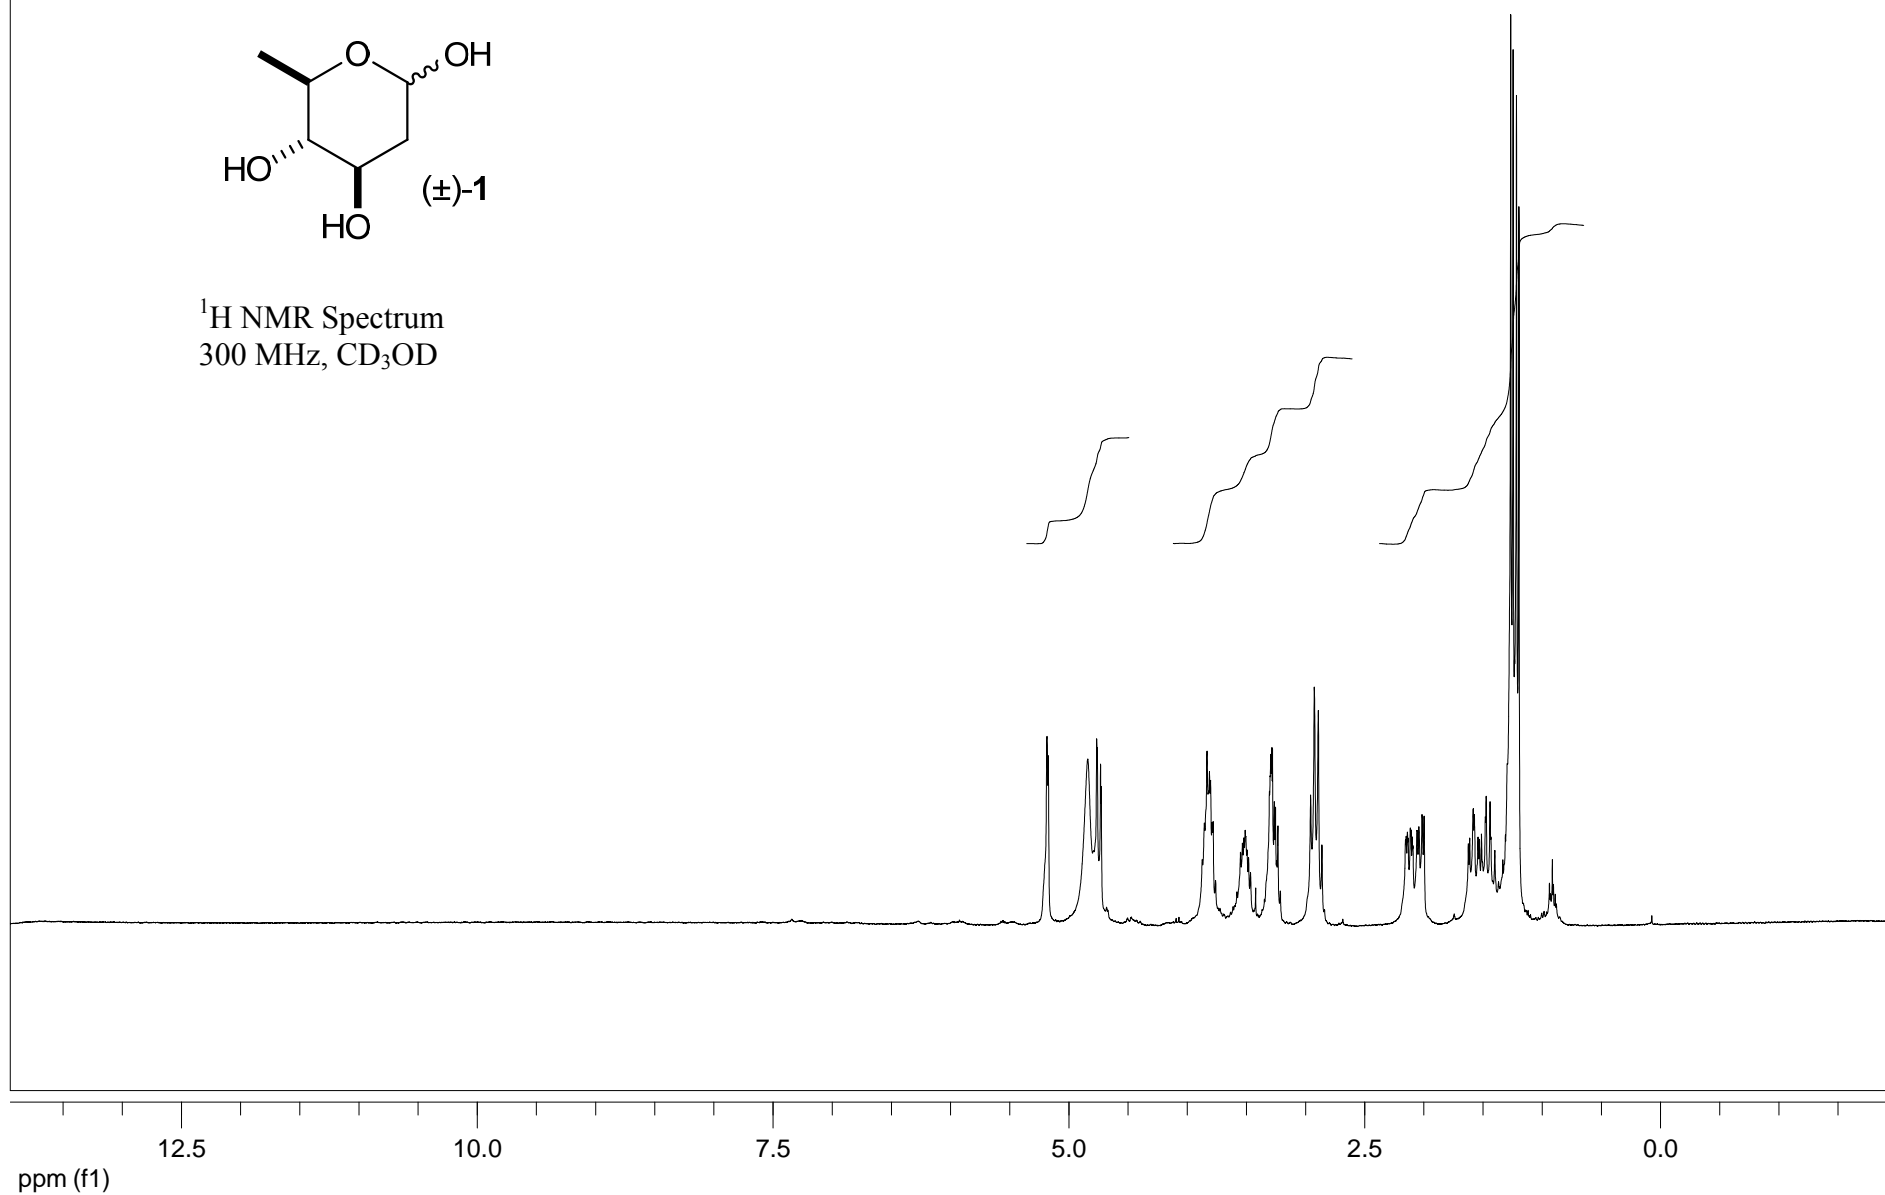

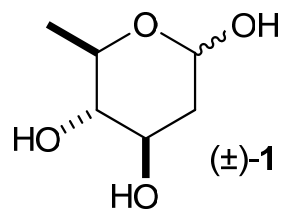

Partial  $^1\text{H}$  NMR Spectrum  
300 MHz,  $\text{CD}_3\text{OD}$

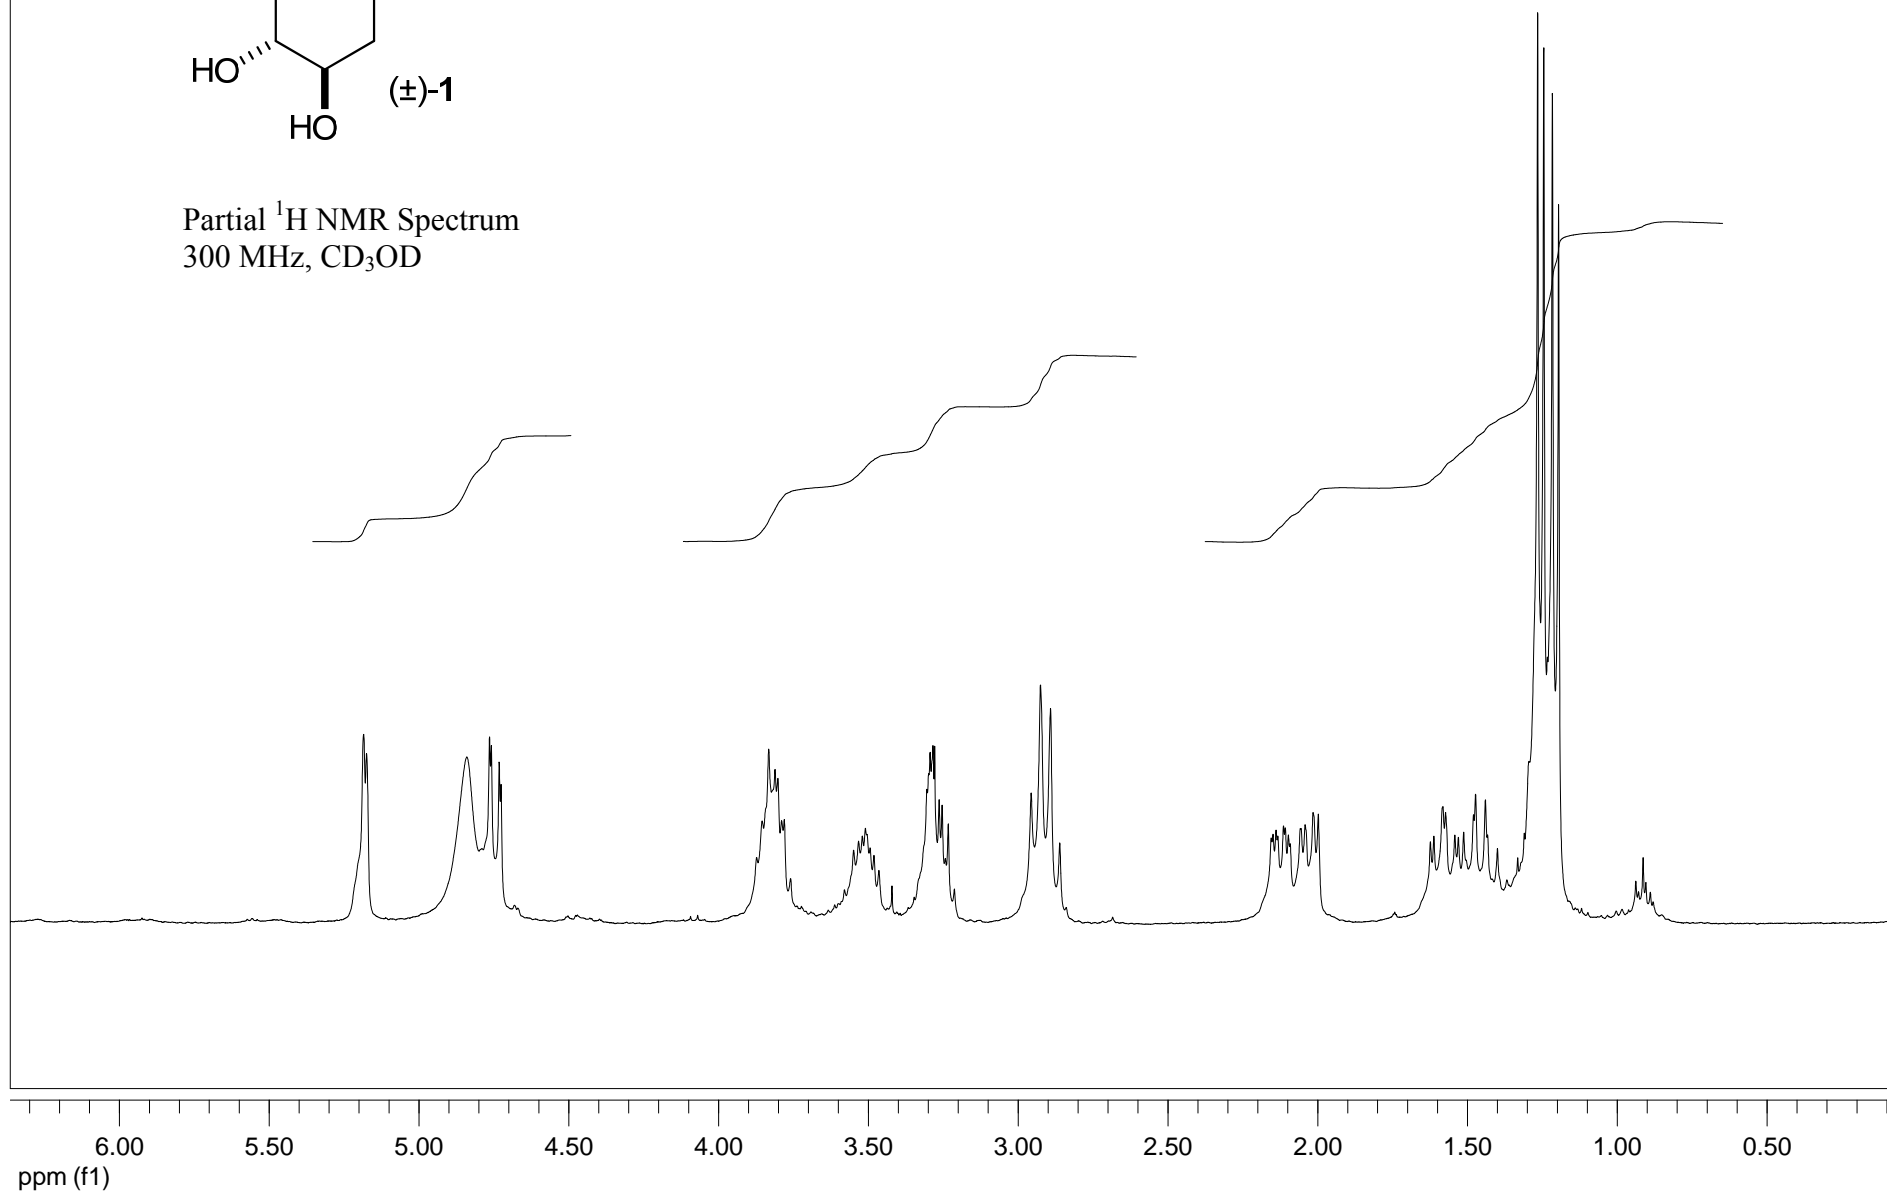

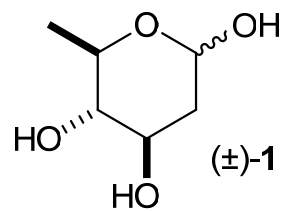

DEPT 135 Spectrum  
75 MHz, CD<sub>3</sub>OD

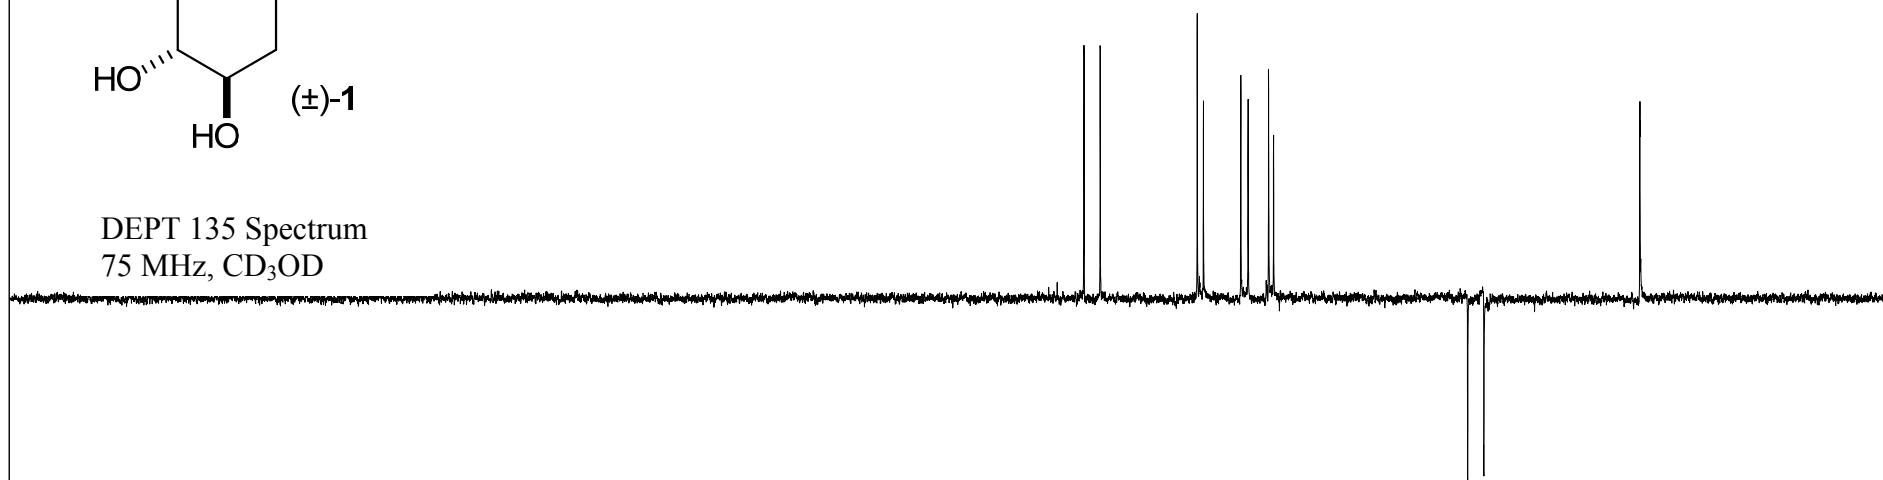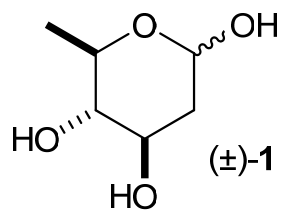

<sup>13</sup>C NMR Spectrum  
75 MHz, CD<sub>3</sub>OD

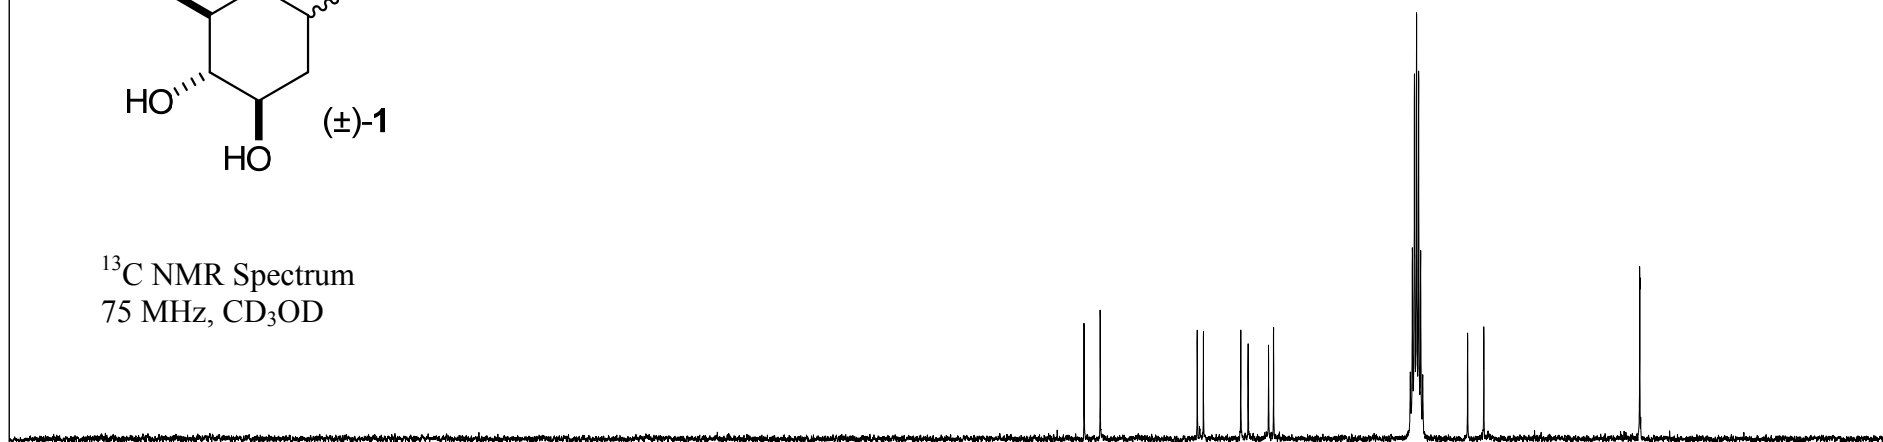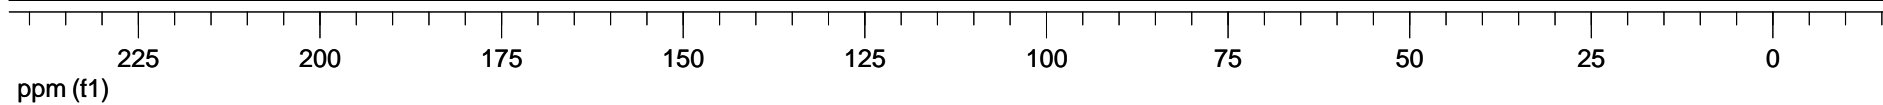

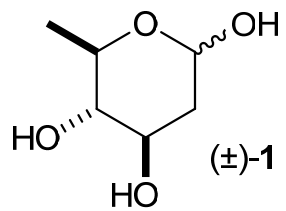

COSY Spectrum  
75 MHz, CD<sub>3</sub>OD

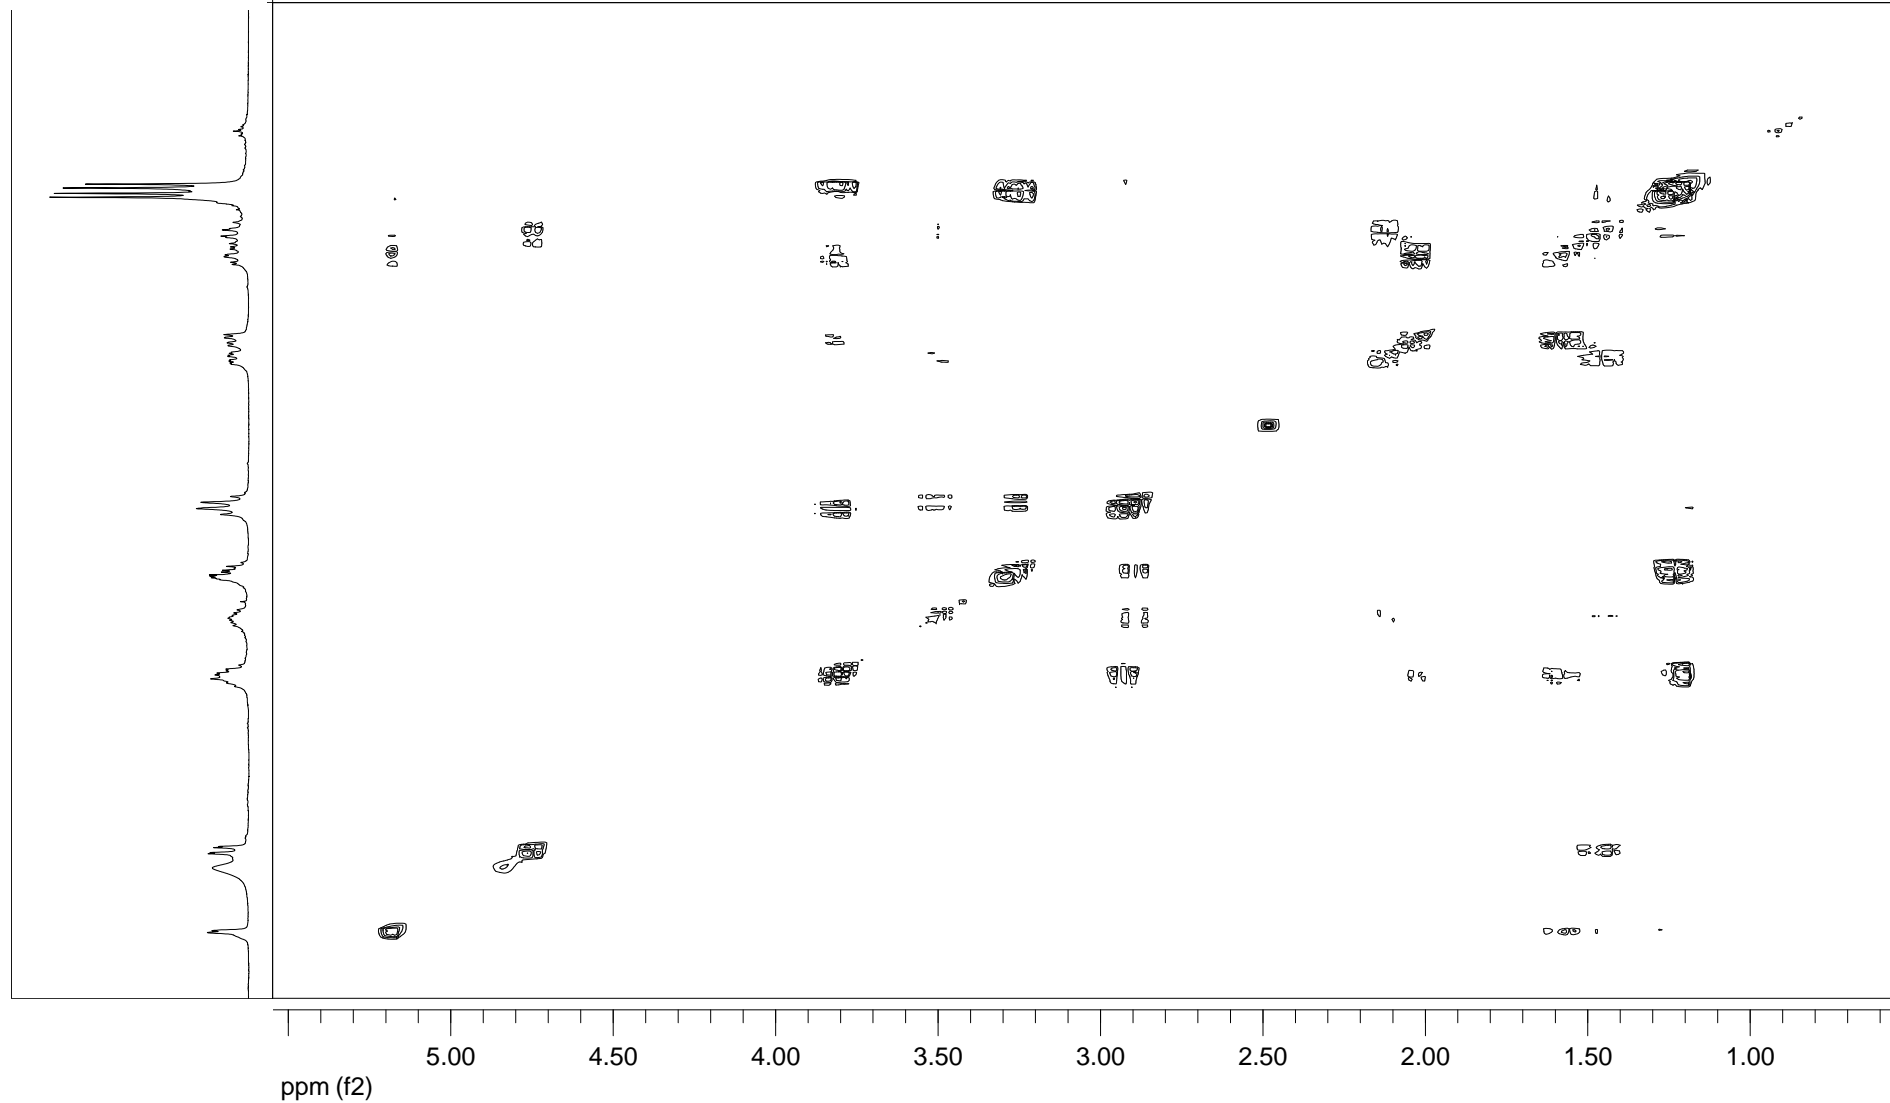

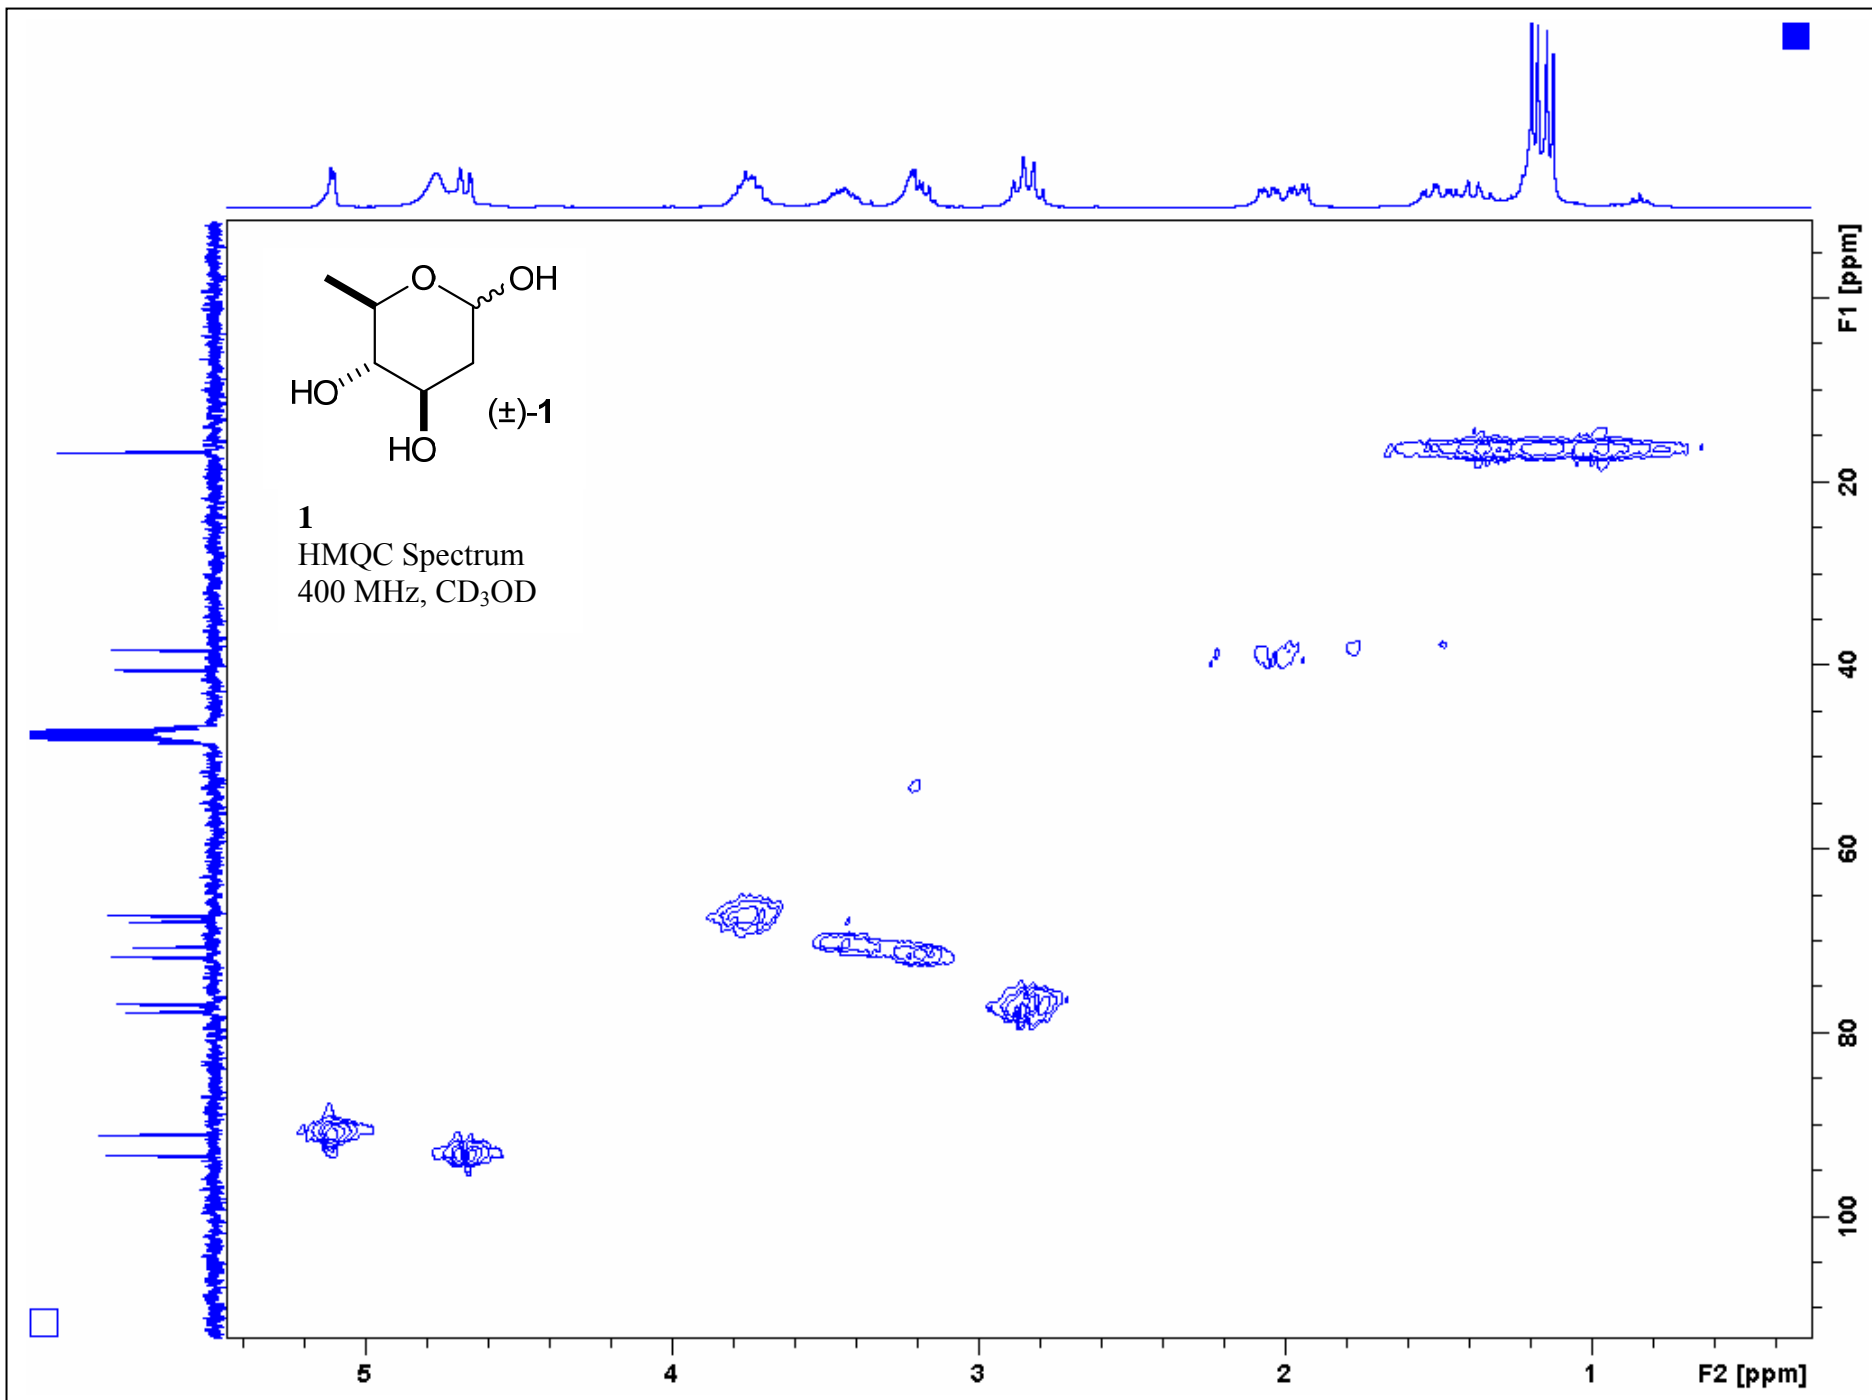

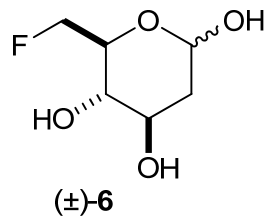

<sup>1</sup>H NMR Spectrum  
300 MHz, Acetone-d<sub>6</sub>

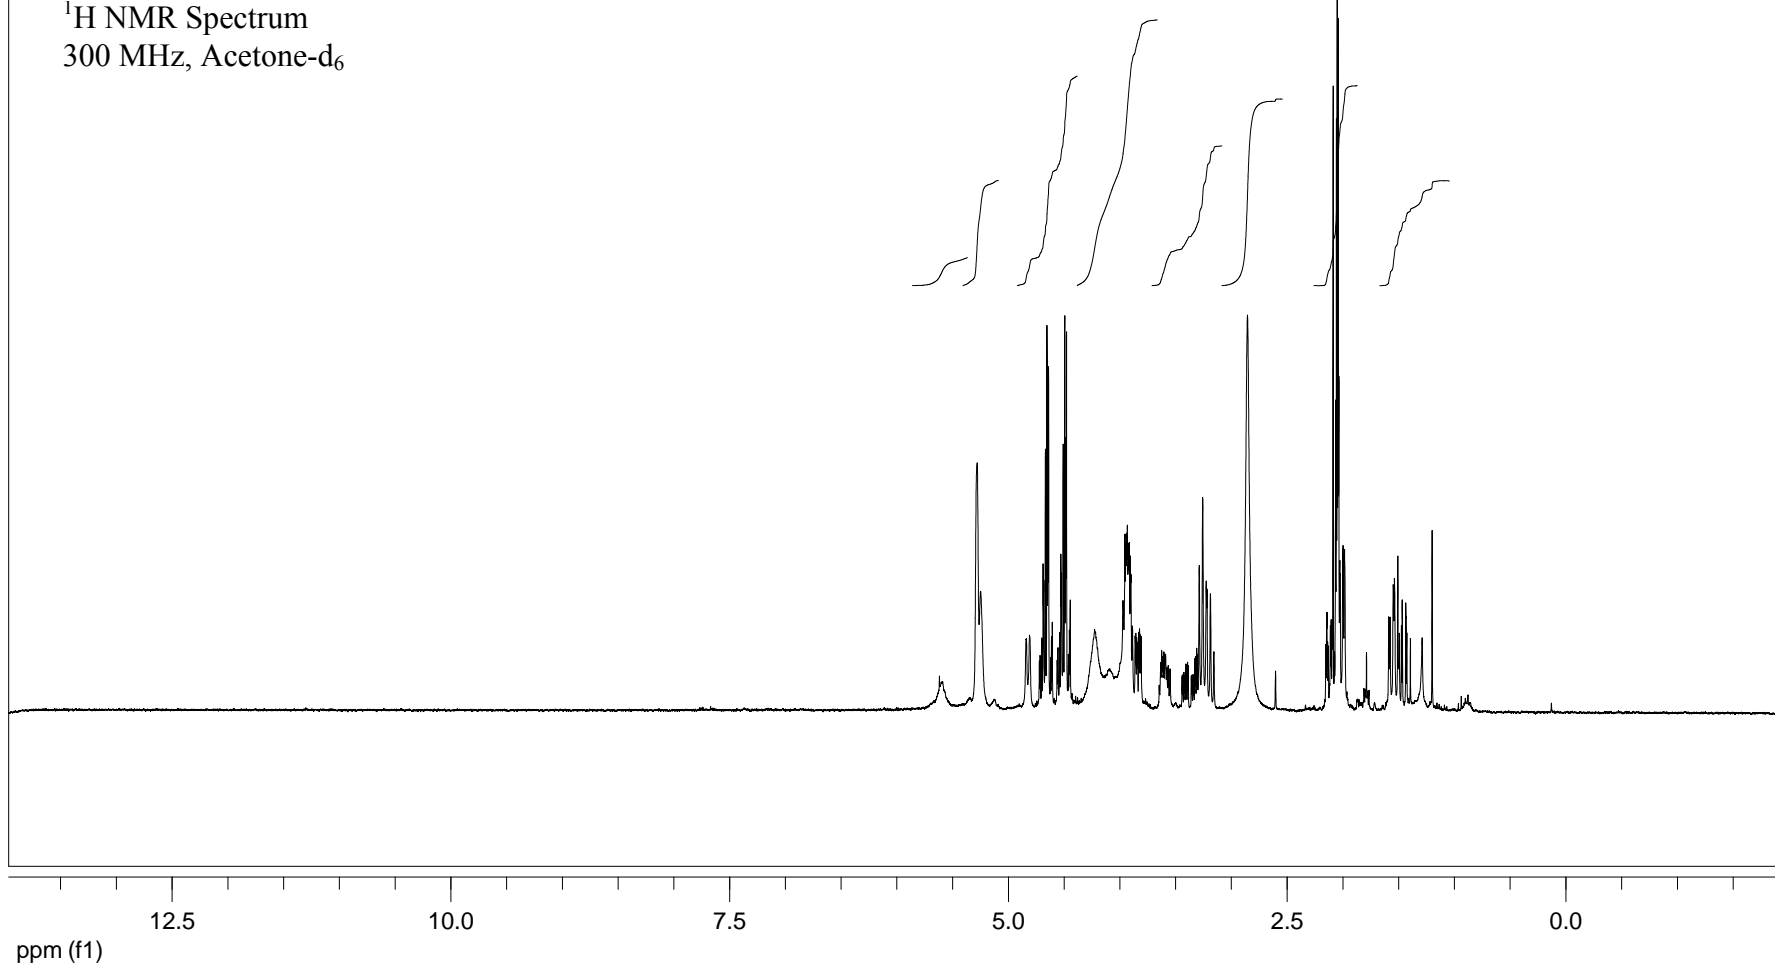

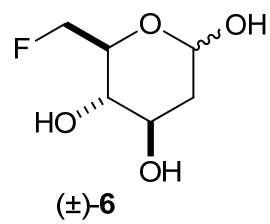

<sup>1</sup>H NMR Spectrum expansion  
400 MHz, Acetone-d<sub>6</sub>

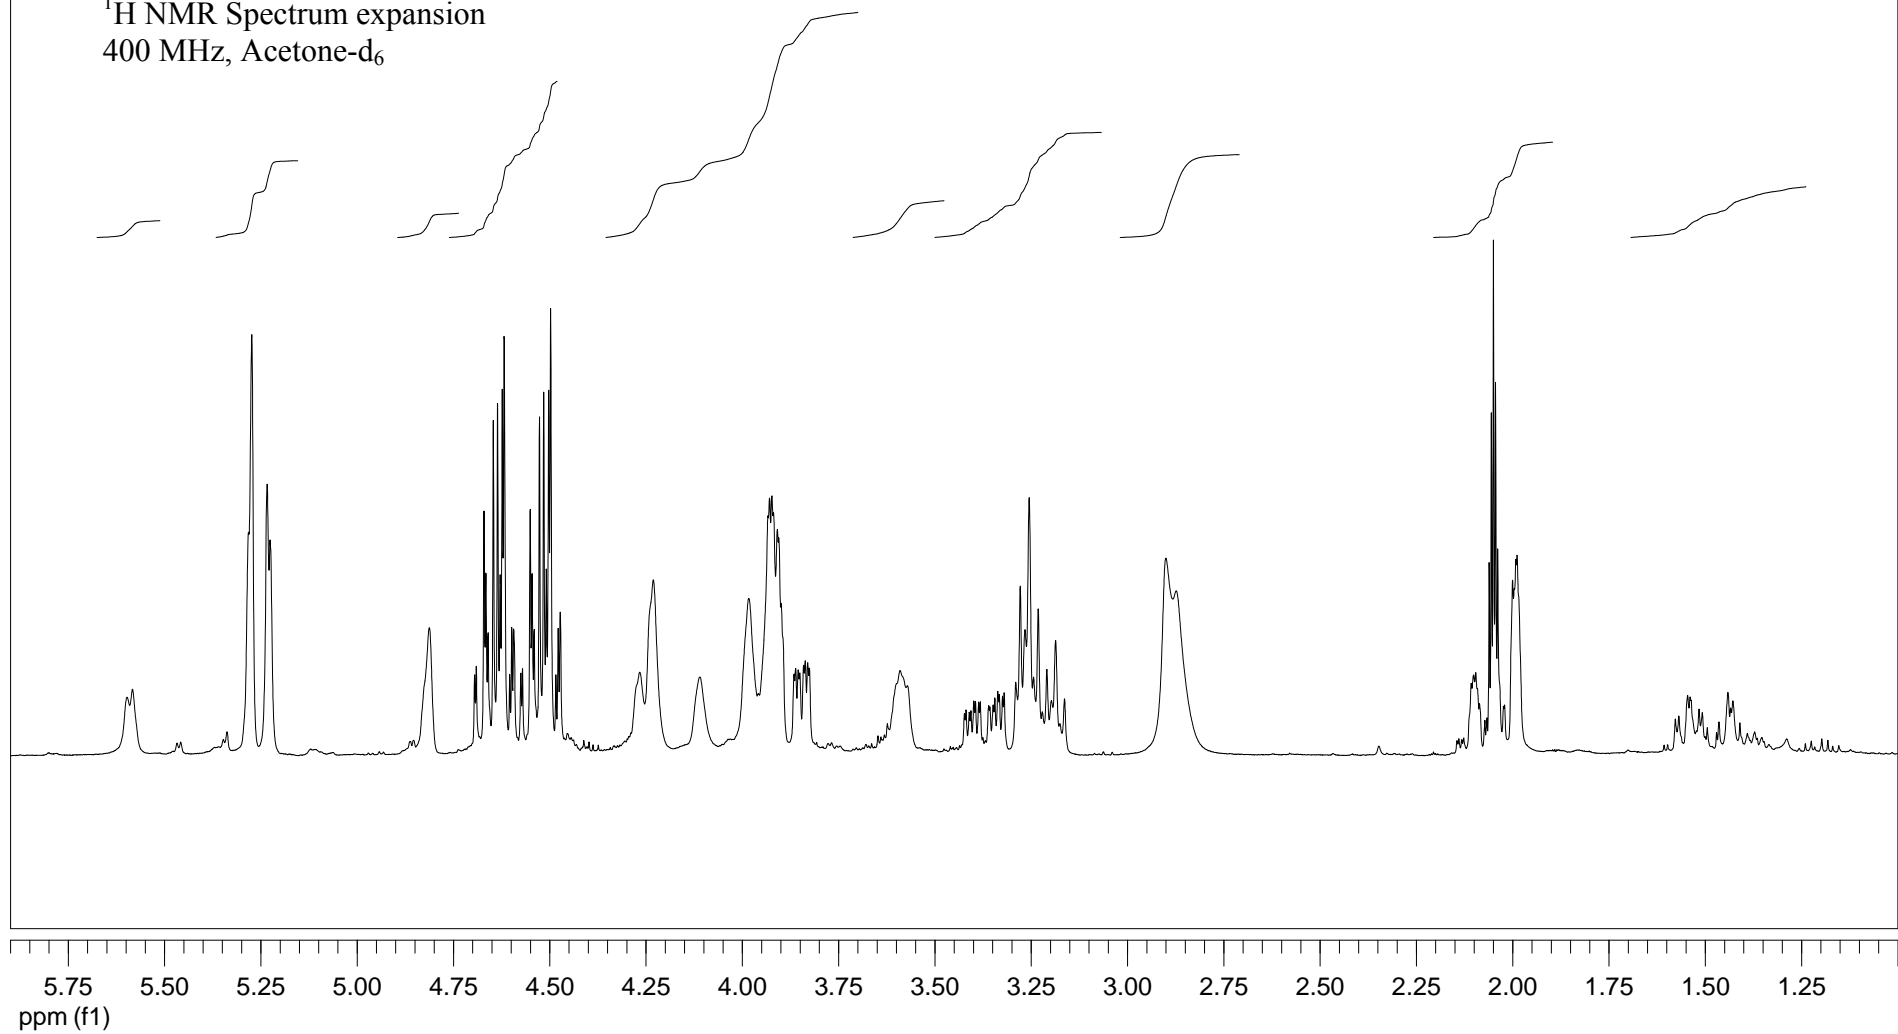



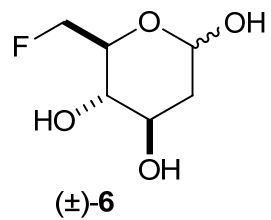

<sup>13</sup>C NMR Spectrum  
75 MHz, Acetone-d<sub>6</sub>

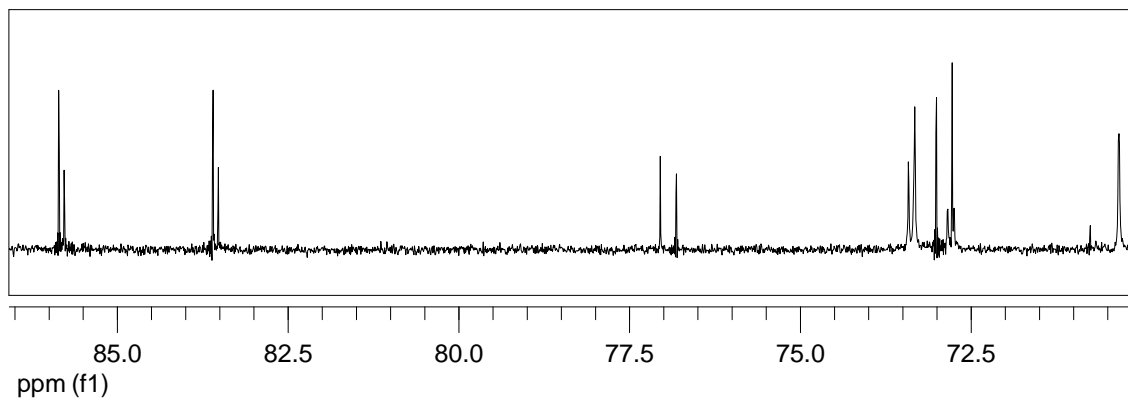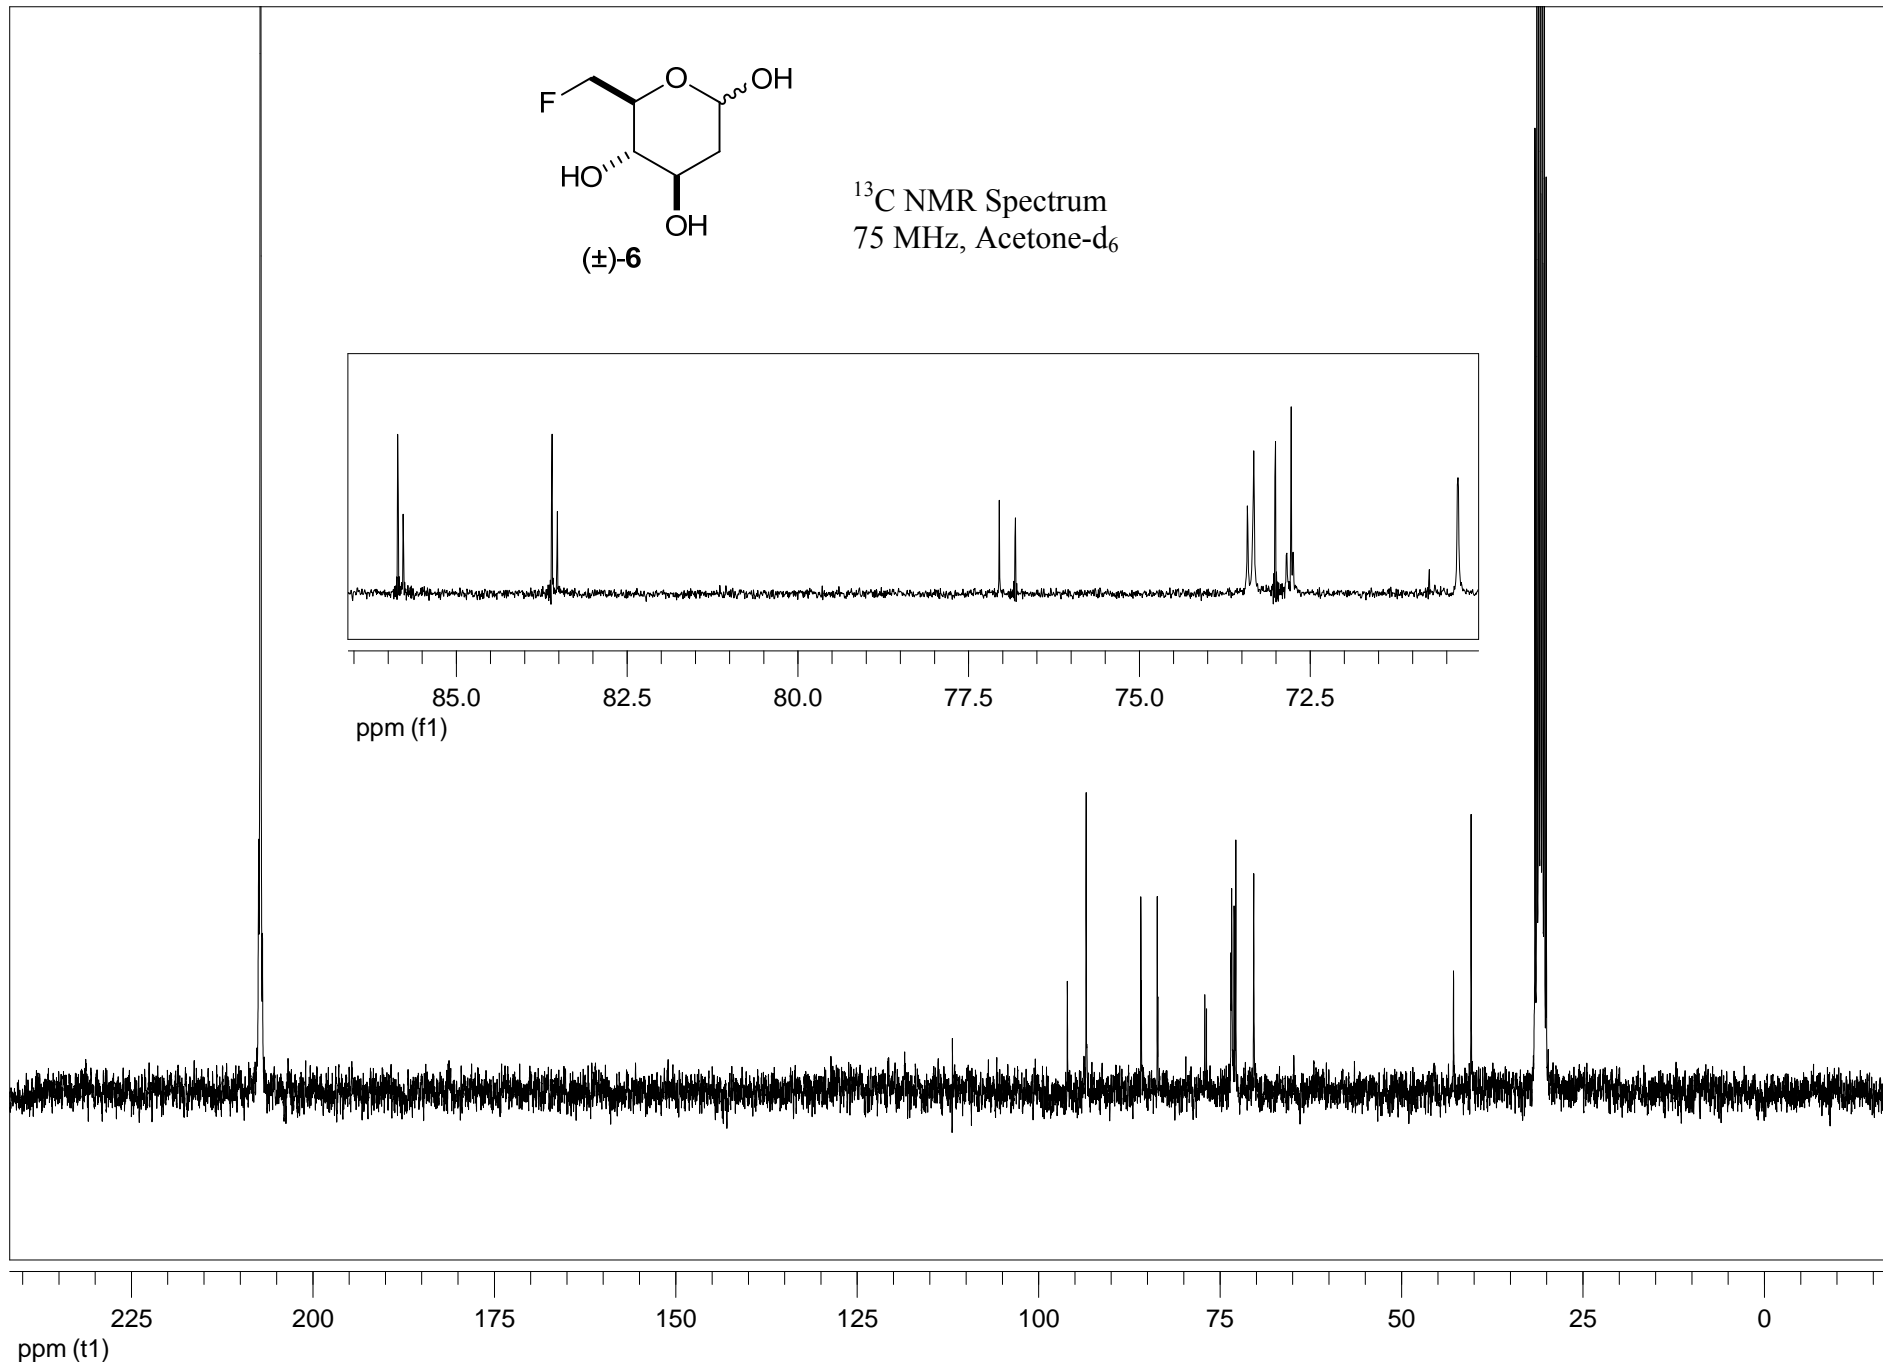

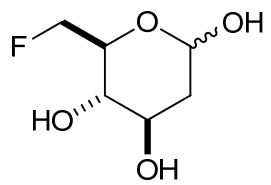

(±)-6

<sup>19</sup>F NMR Spectrum  
282 MHz, Acetone-d<sub>6</sub>

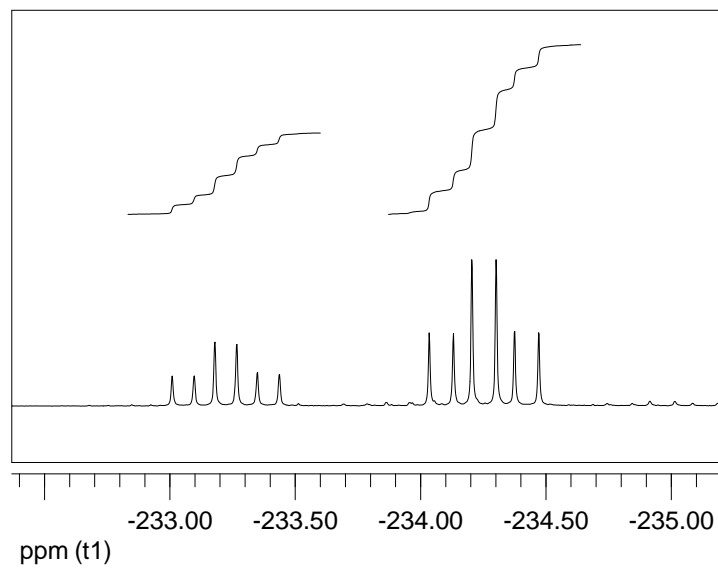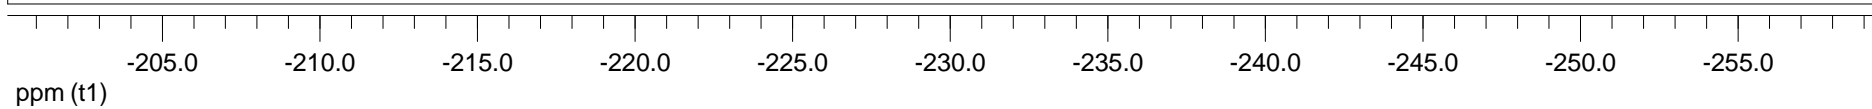

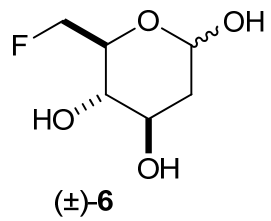

COSY Spectrum, 400 MHz, Acetone-d<sub>6</sub>

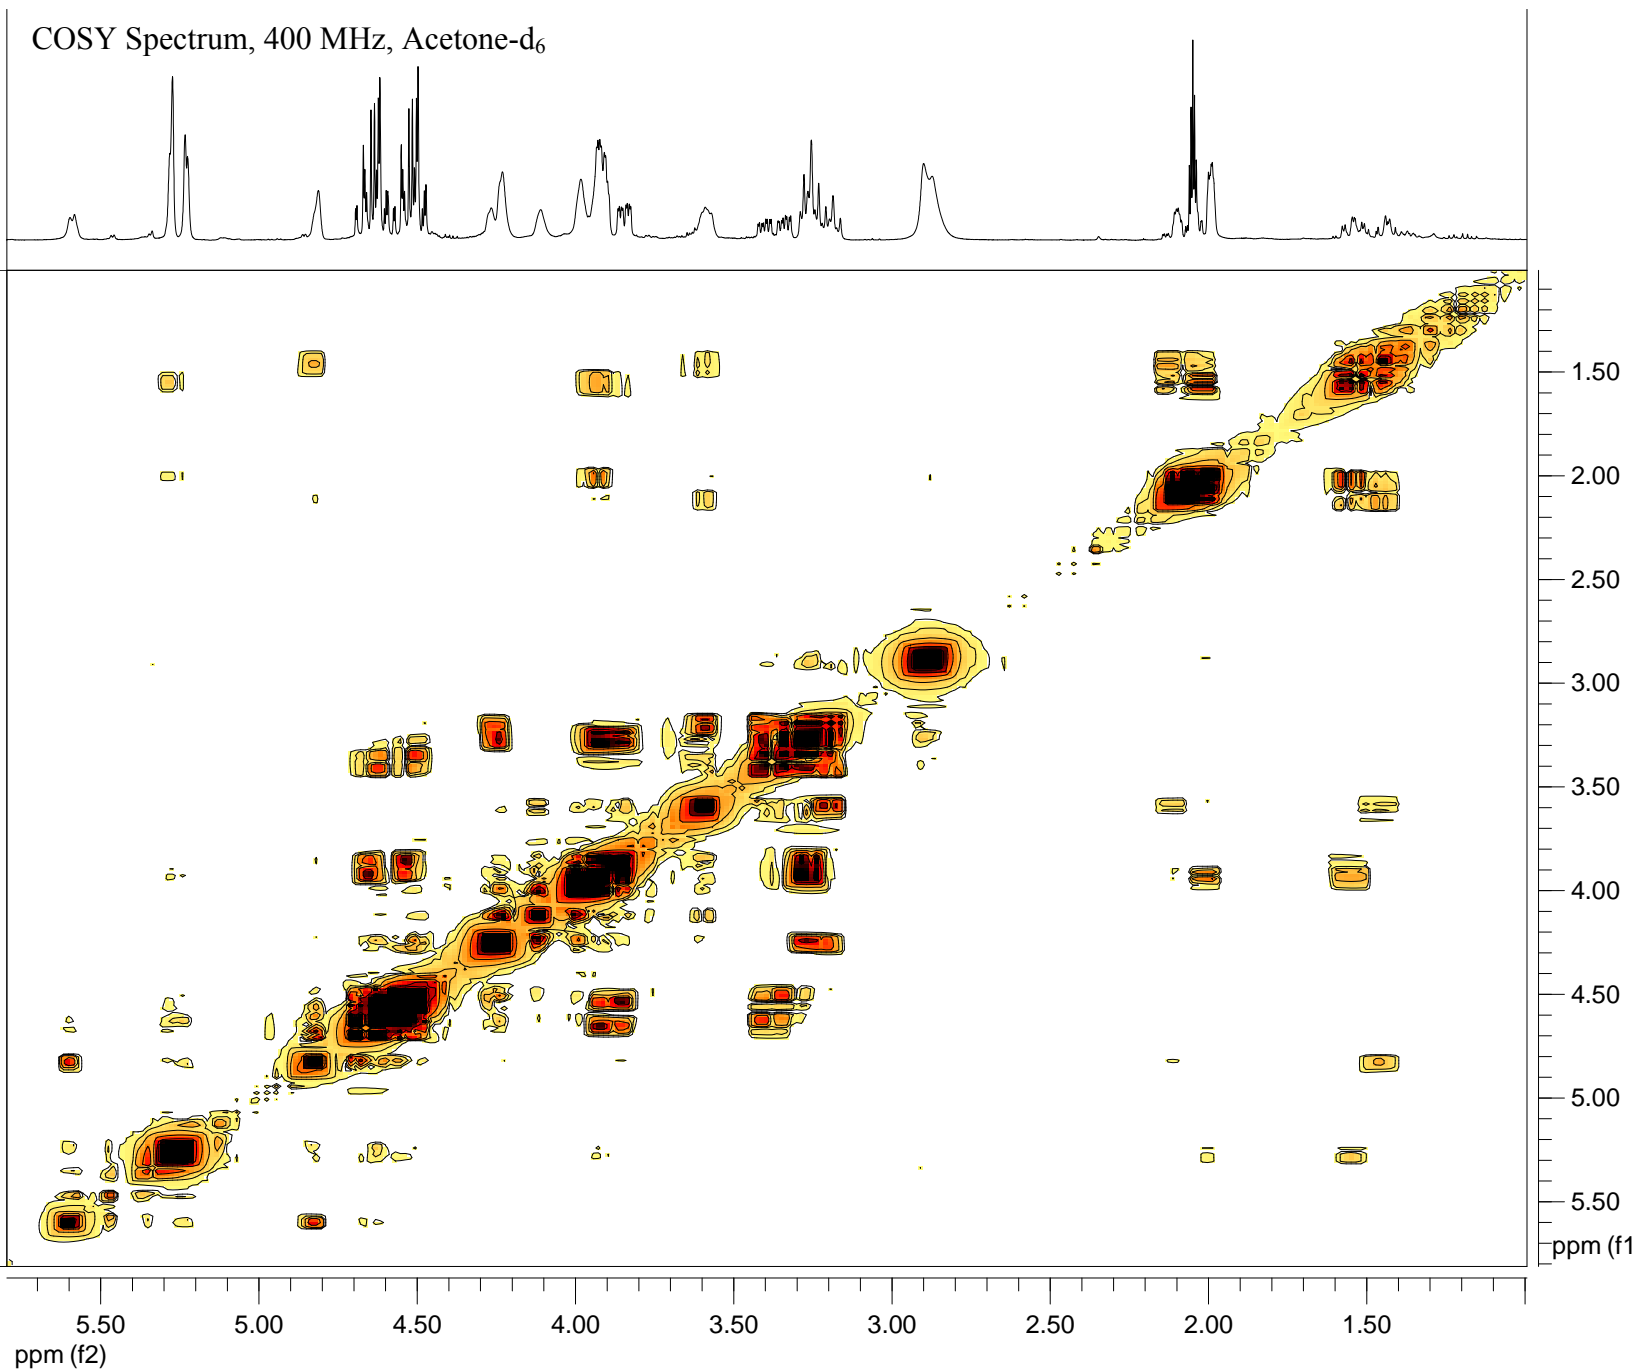

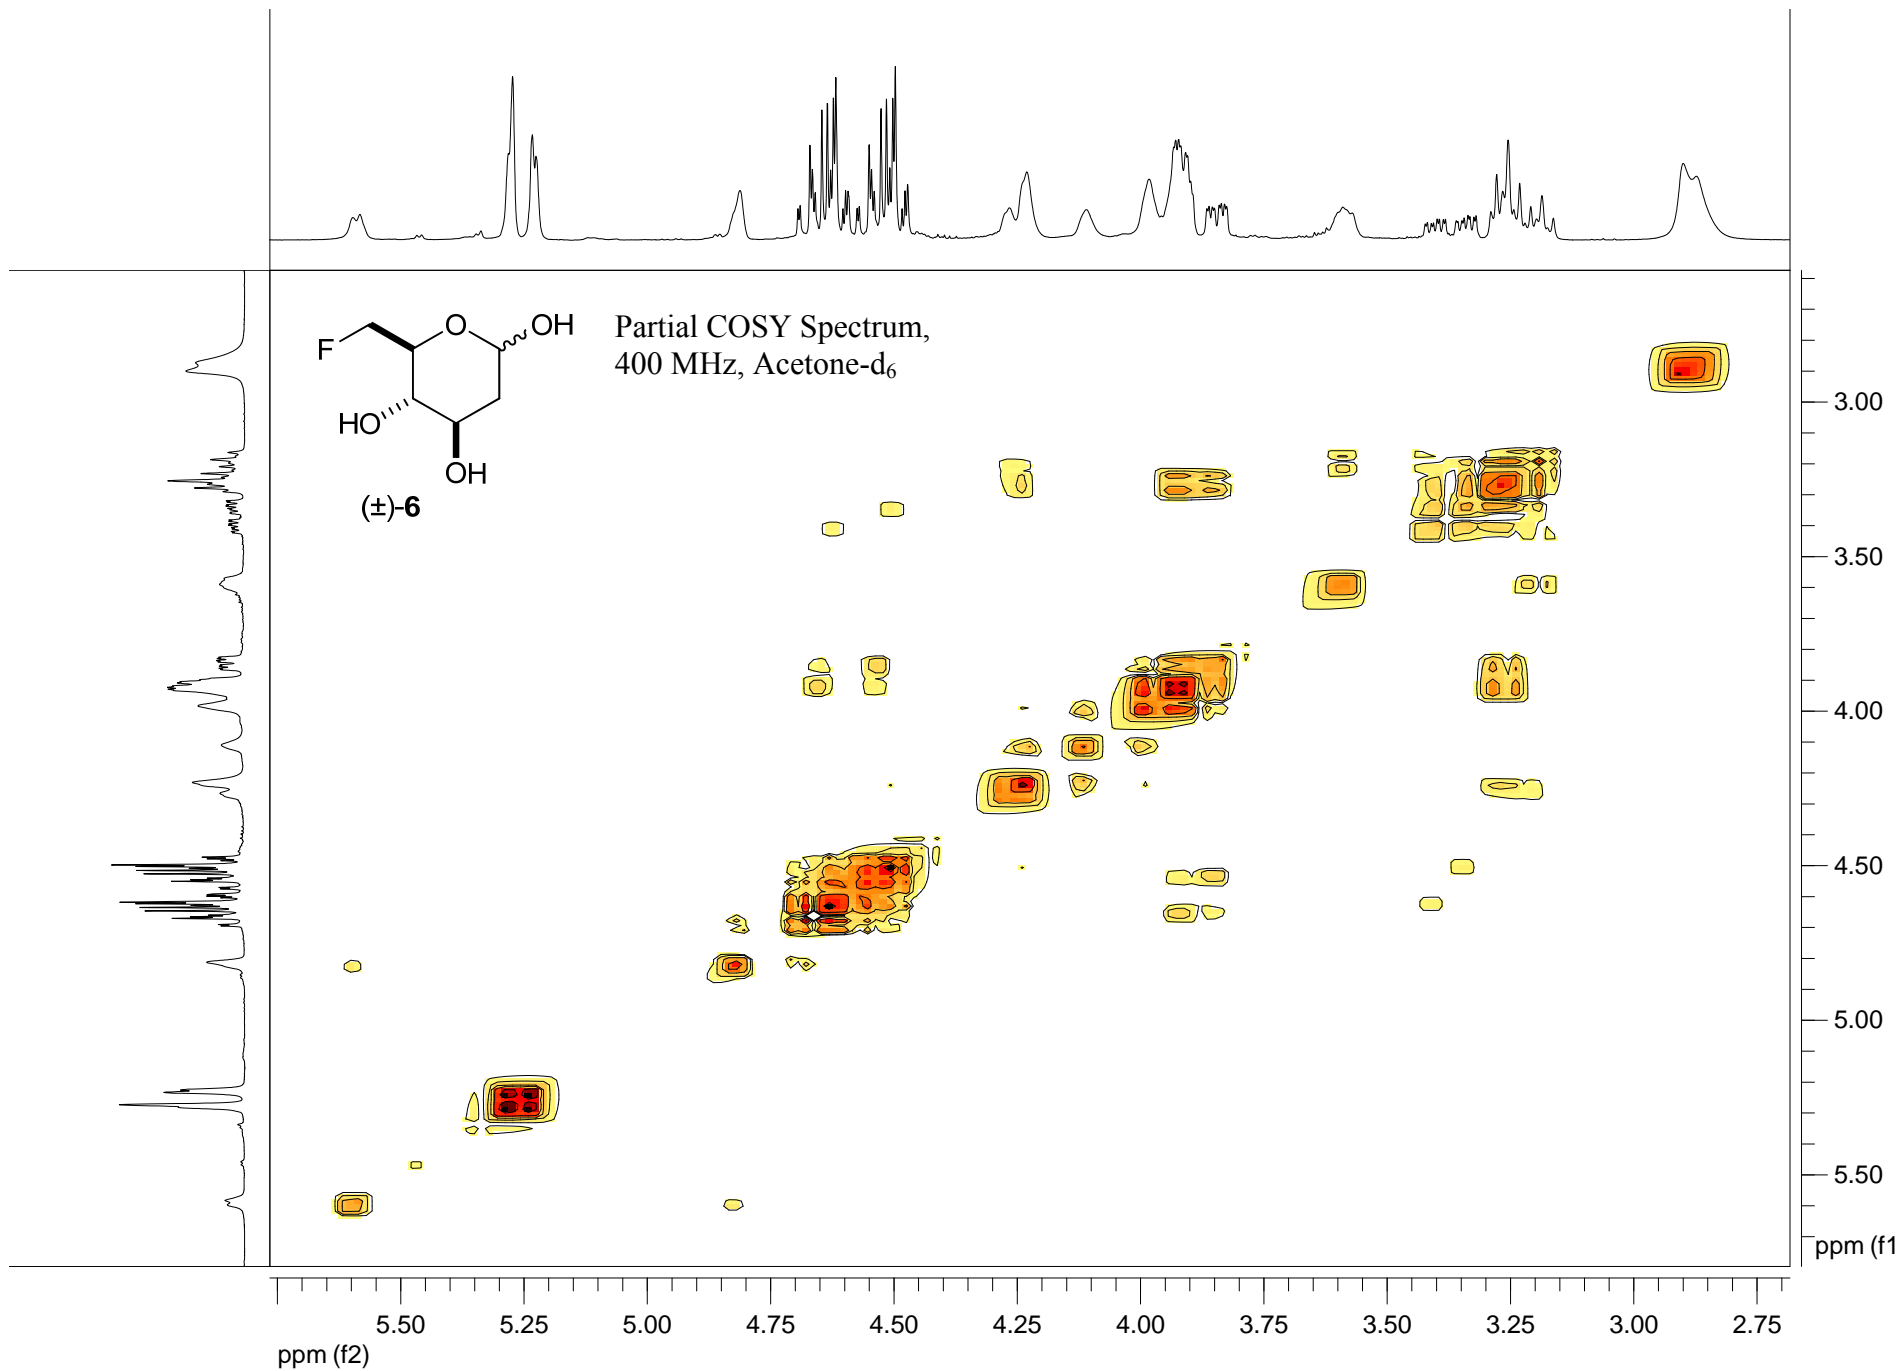

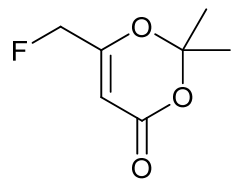

**8**

<sup>1</sup>H NMR Spectrum  
300 MHz, CDCl<sub>3</sub>

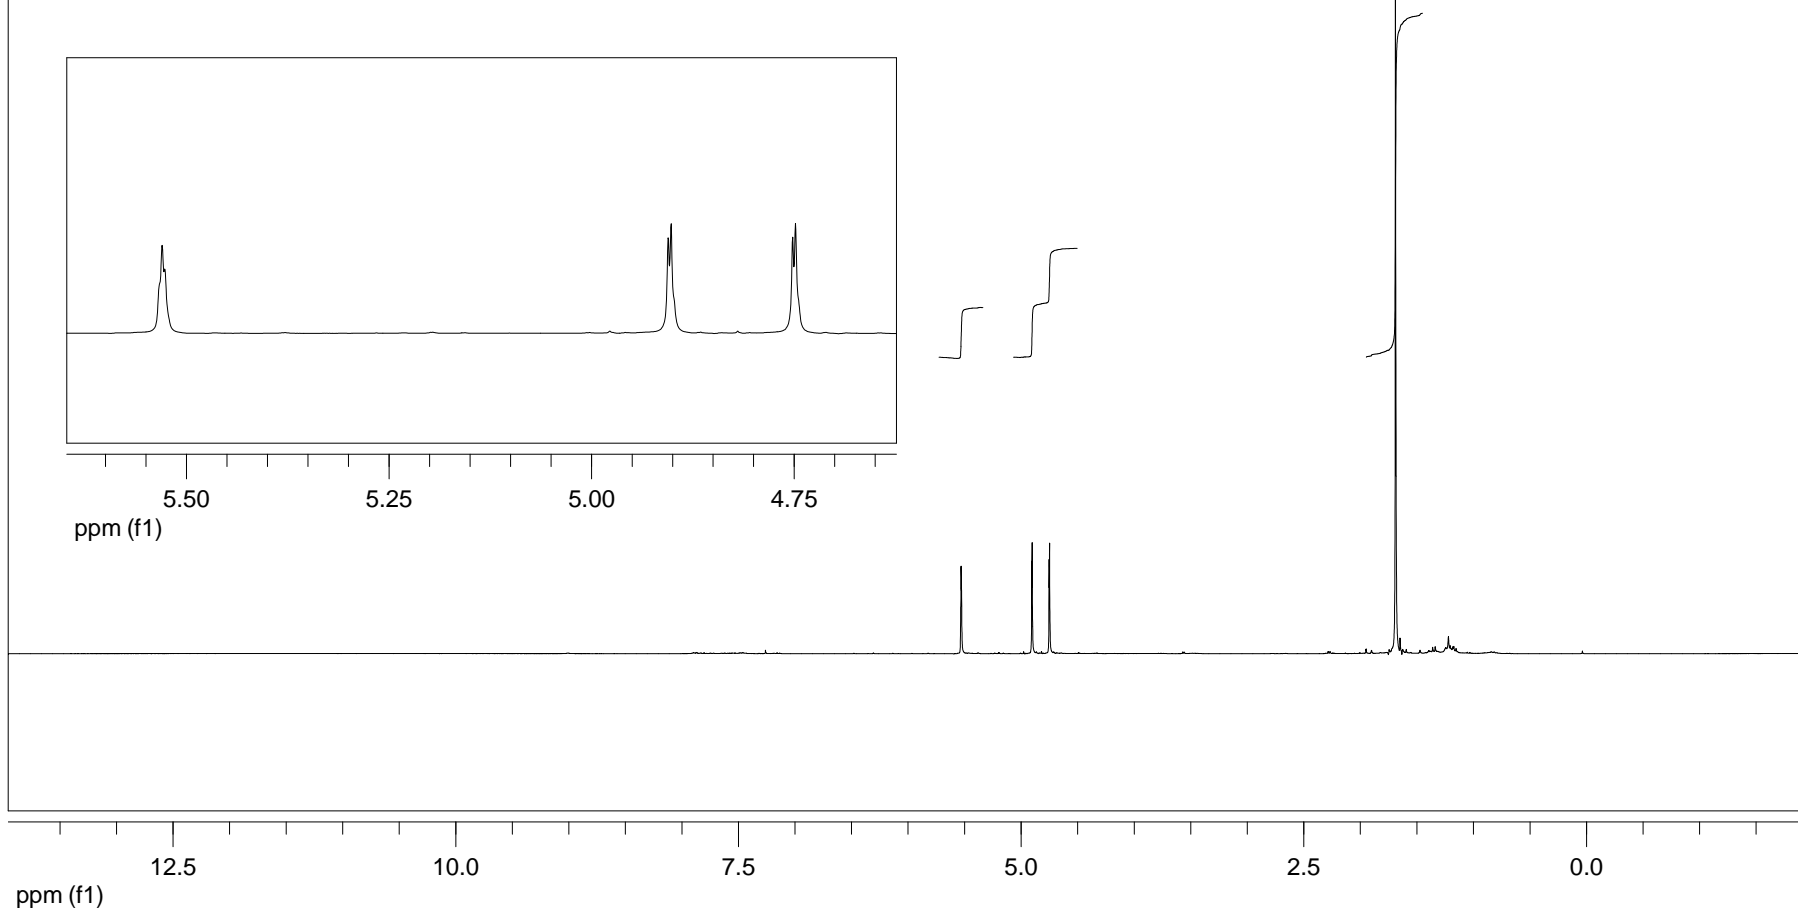

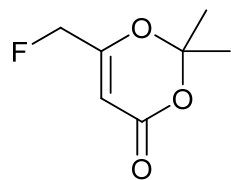

**8**

$^{13}\text{C}$  NMR Spectrum  
75 MHz,  $\text{CDCl}_3$

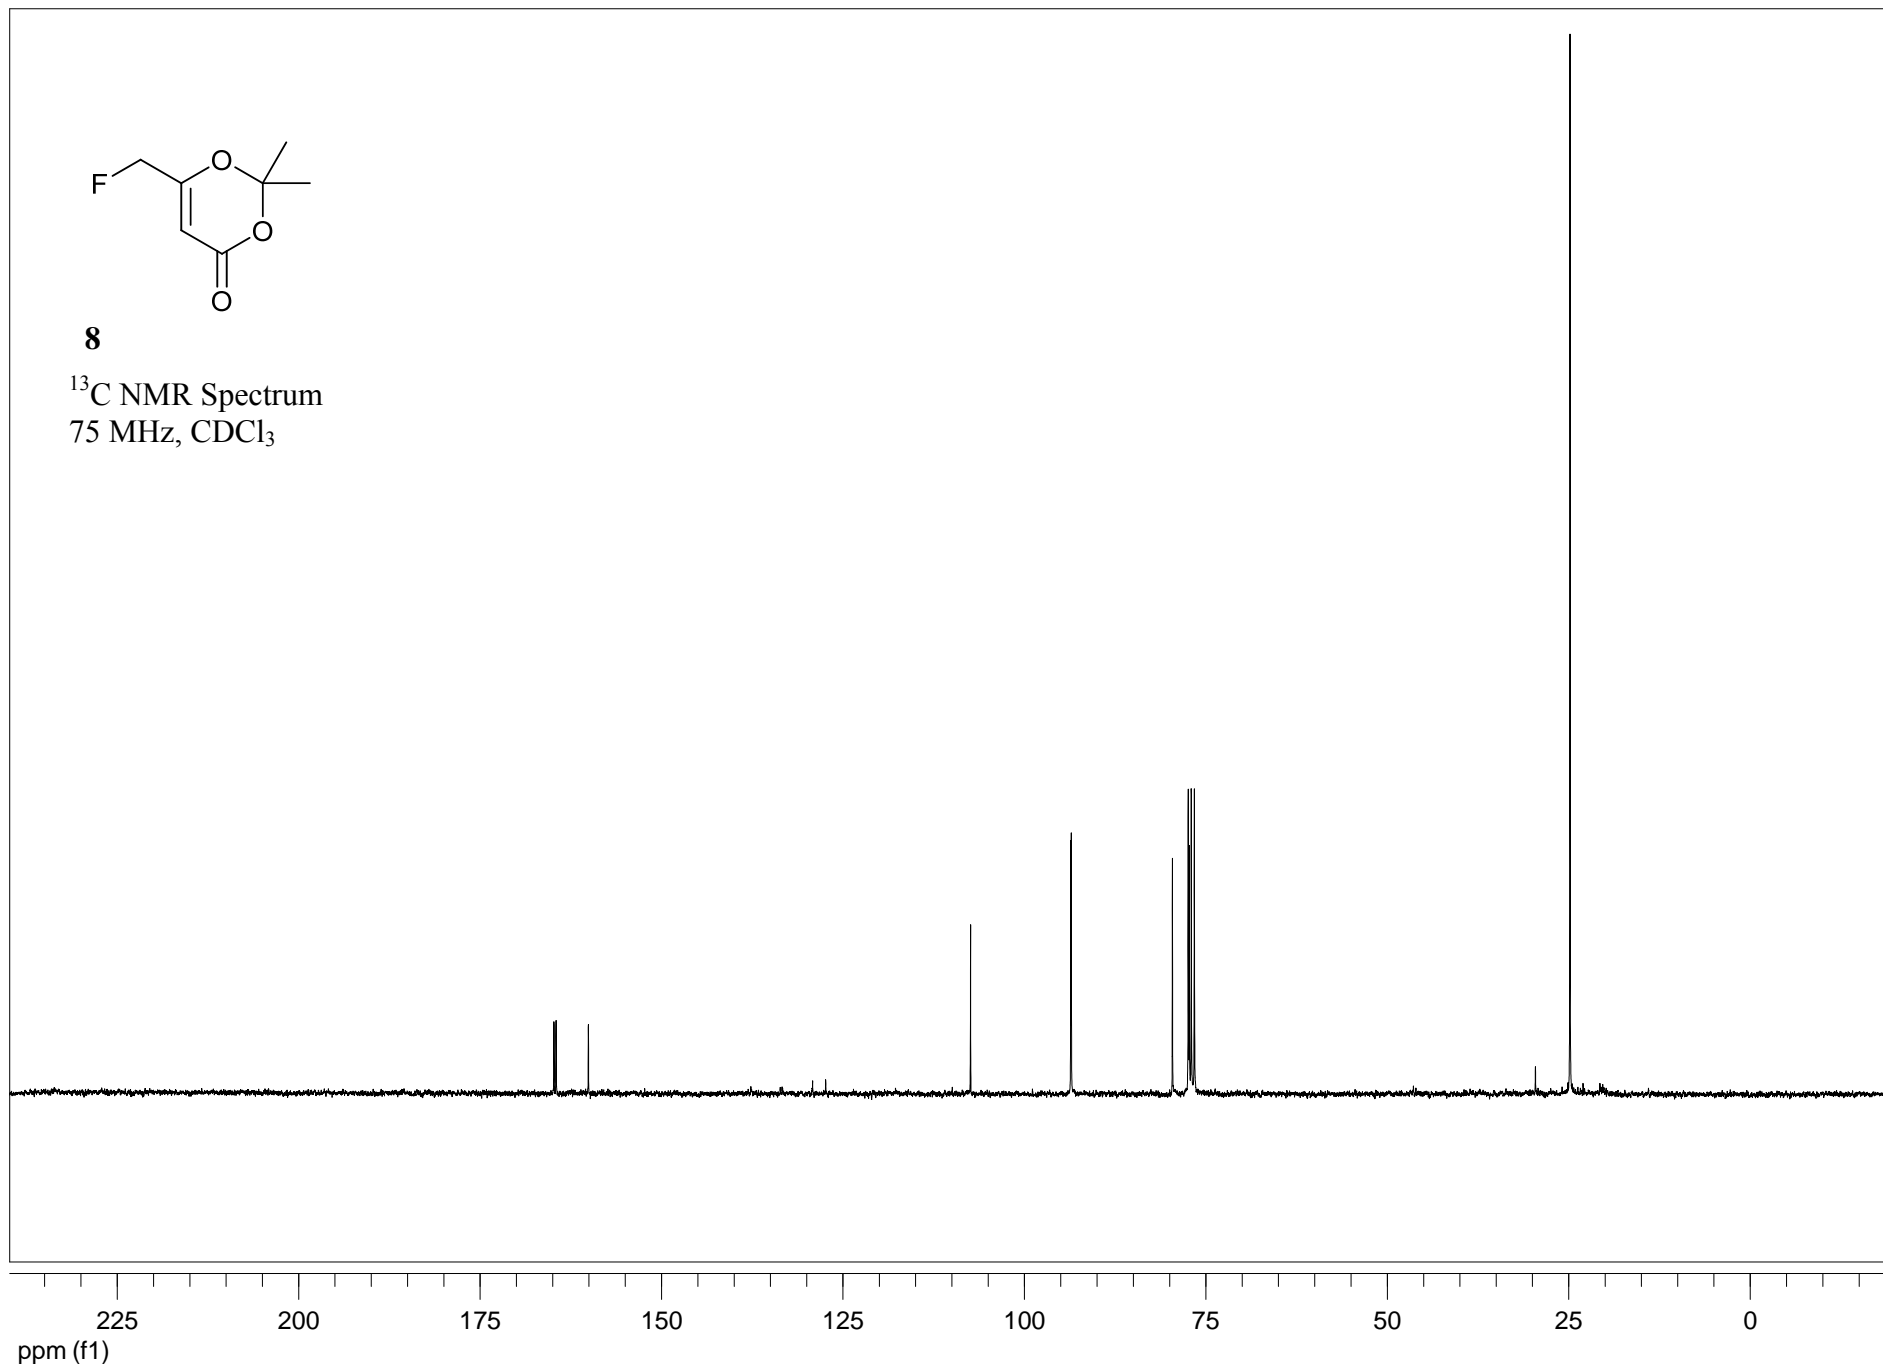

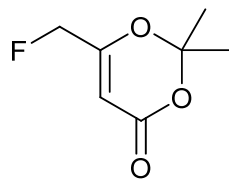

**8**

$^{13}\text{C}$  NMR Spectrum (expansion)  
75 MHz,  $\text{CDCl}_3$

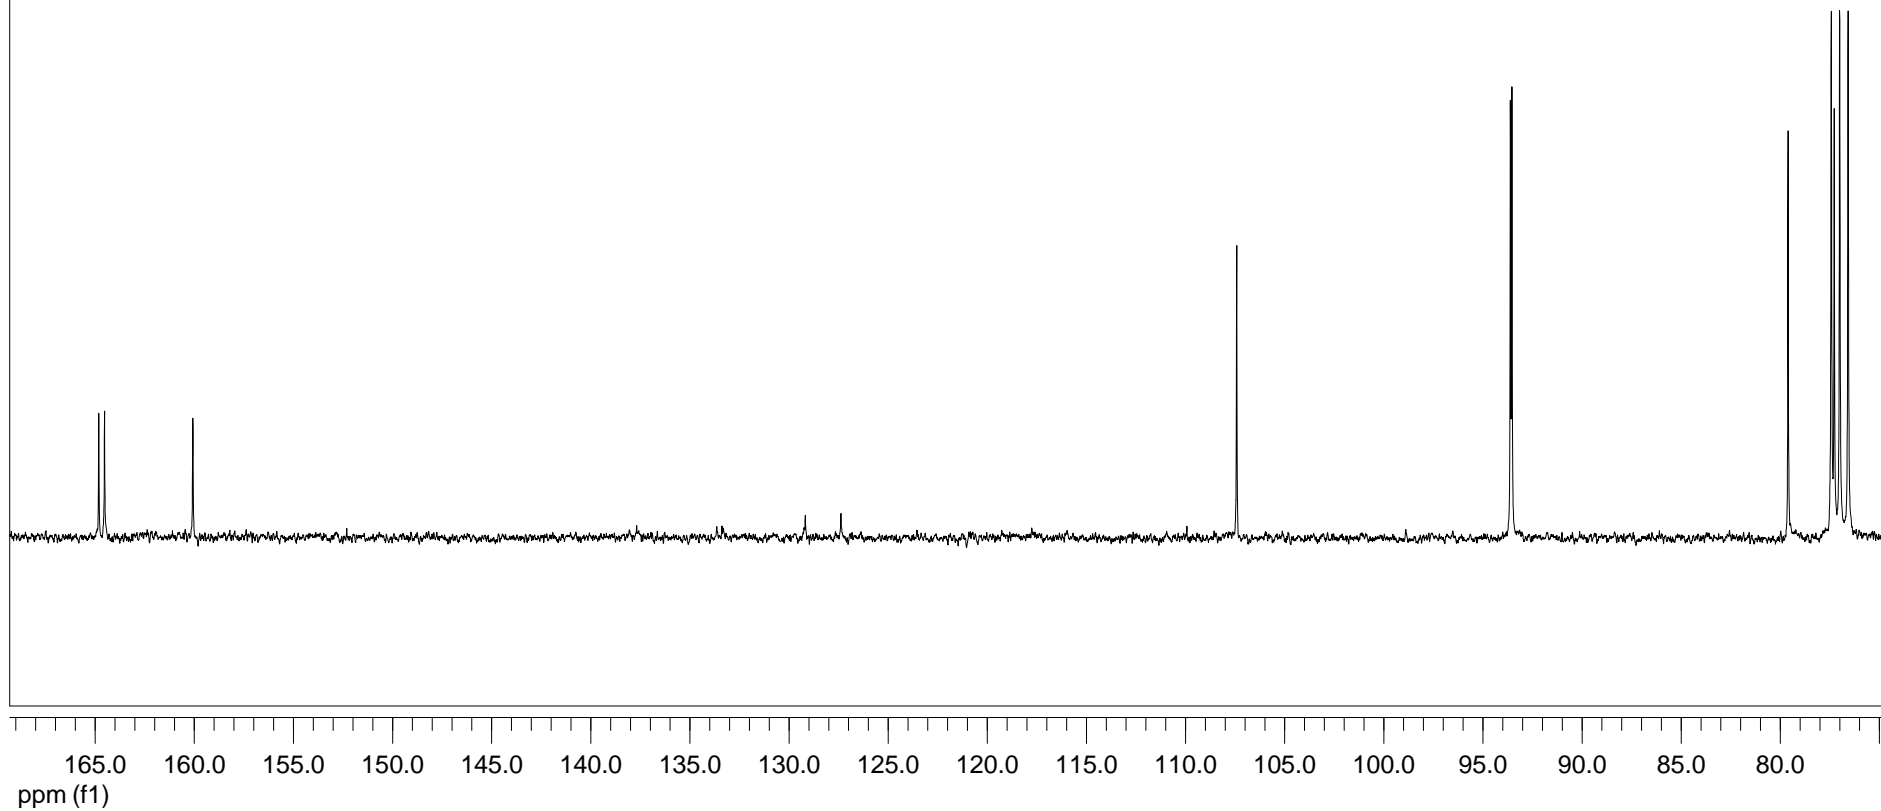

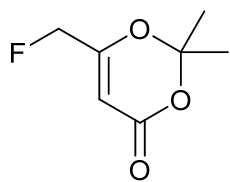

**8**

$^{19}\text{F}$  NMR Spectrum  
282 MHz,  $\text{CDCl}_3$

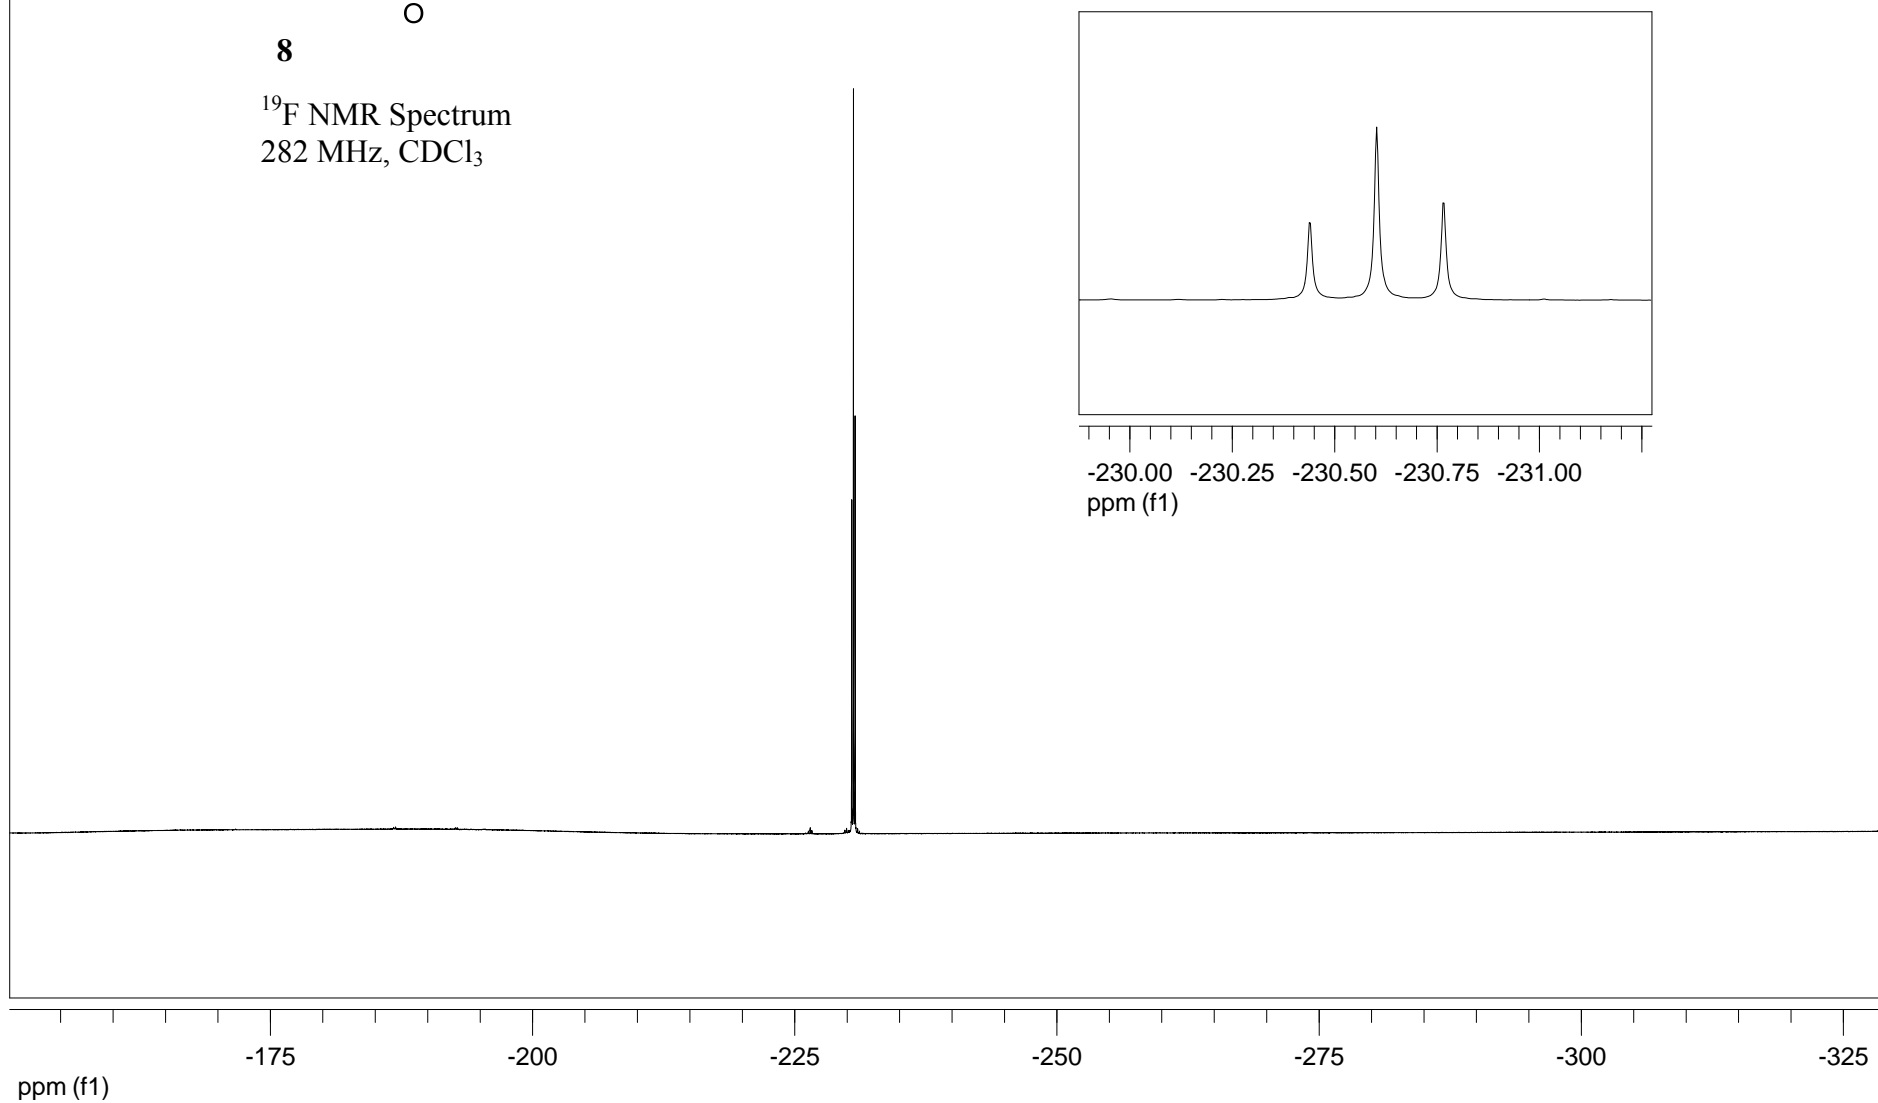



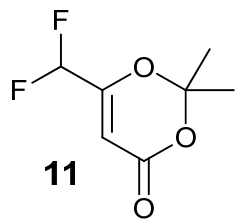

<sup>1</sup>H NMR Spectrum  
300 MHz, CDCl<sub>3</sub>

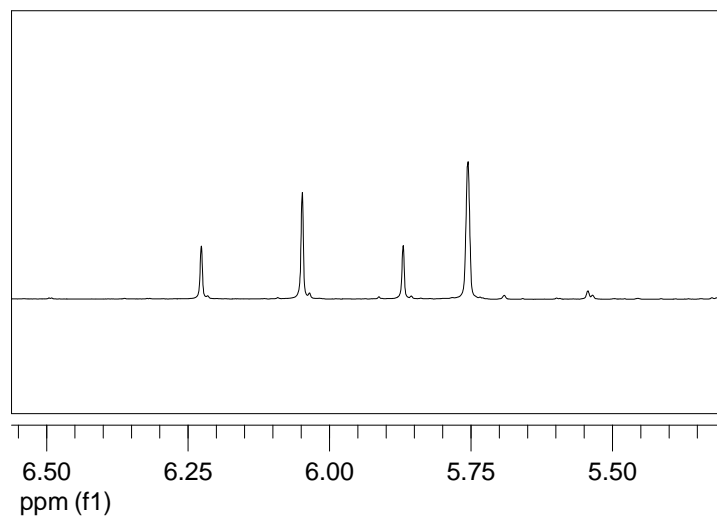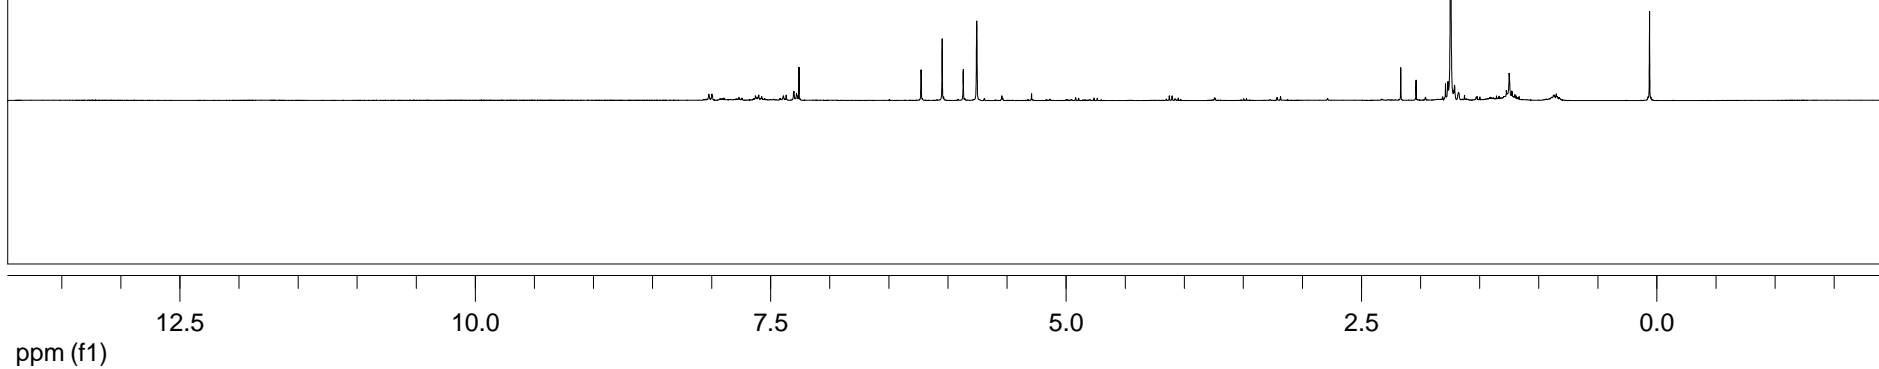

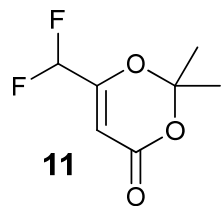

<sup>13</sup>C NMR Spectrum  
75 MHz, CDCl<sub>3</sub>

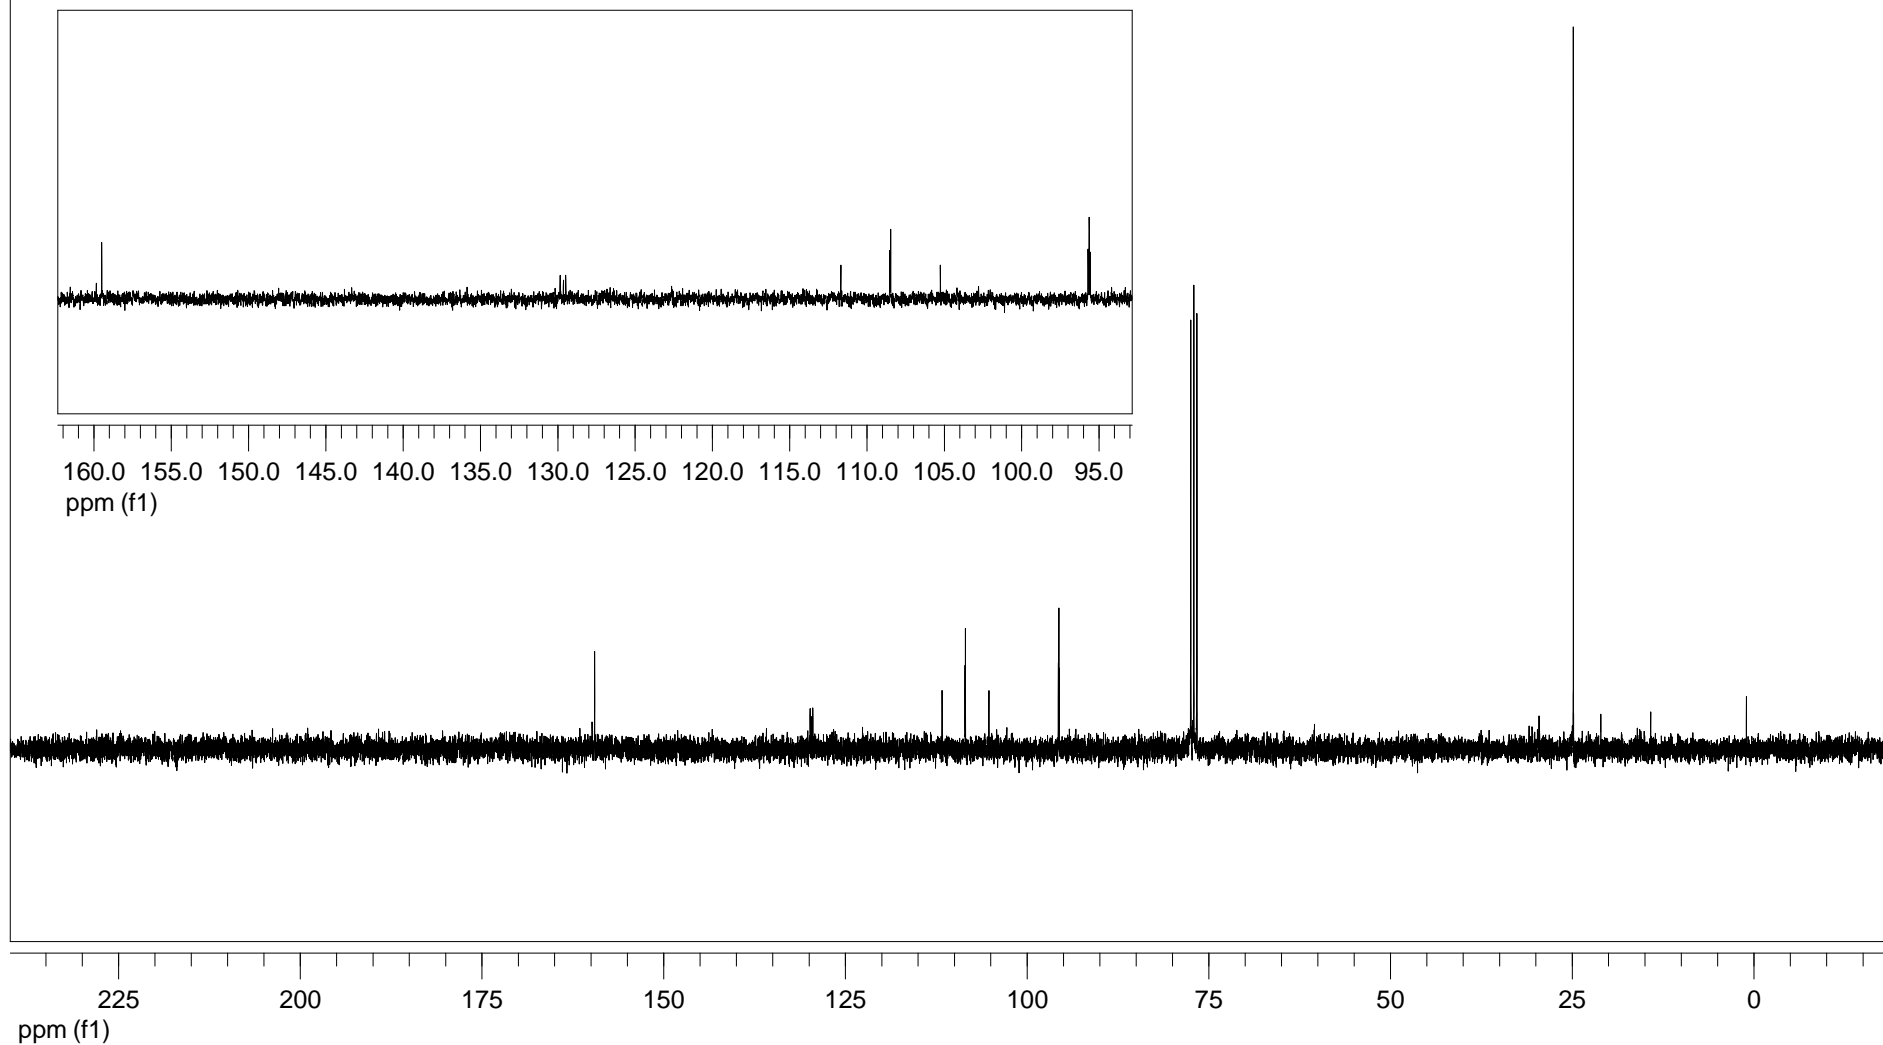

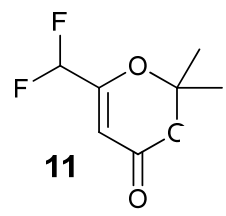

<sup>19</sup>F NMR Spec  
282 MHz, CDCl<sub>3</sub>

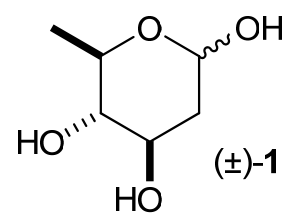

HMQC Spectrum  
CD<sub>3</sub>OD

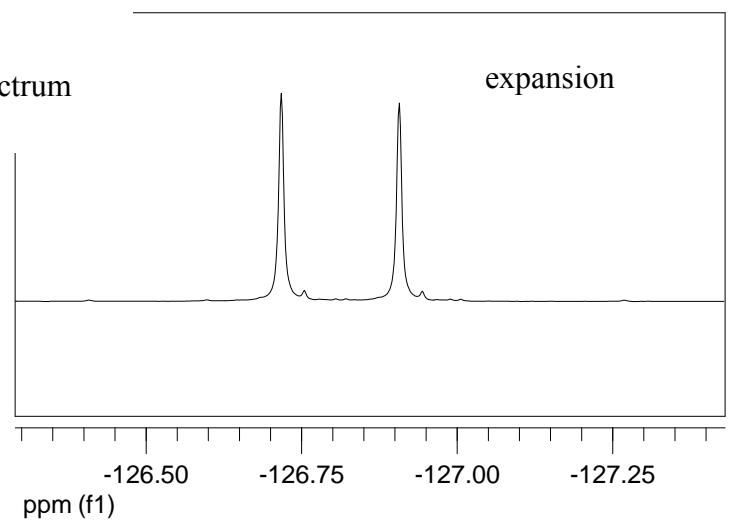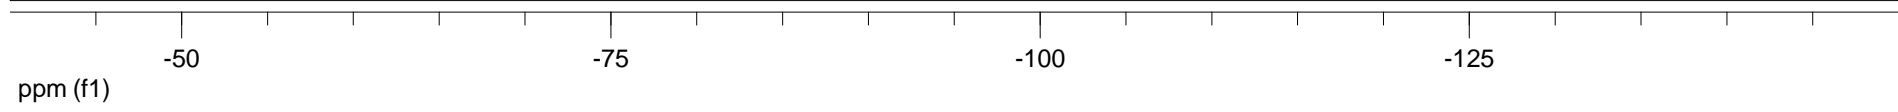

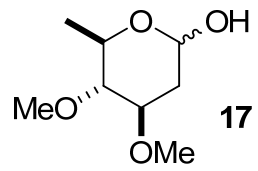

<sup>1</sup>H NMR Spectrum  
300 MHz, CDCl<sub>3</sub>

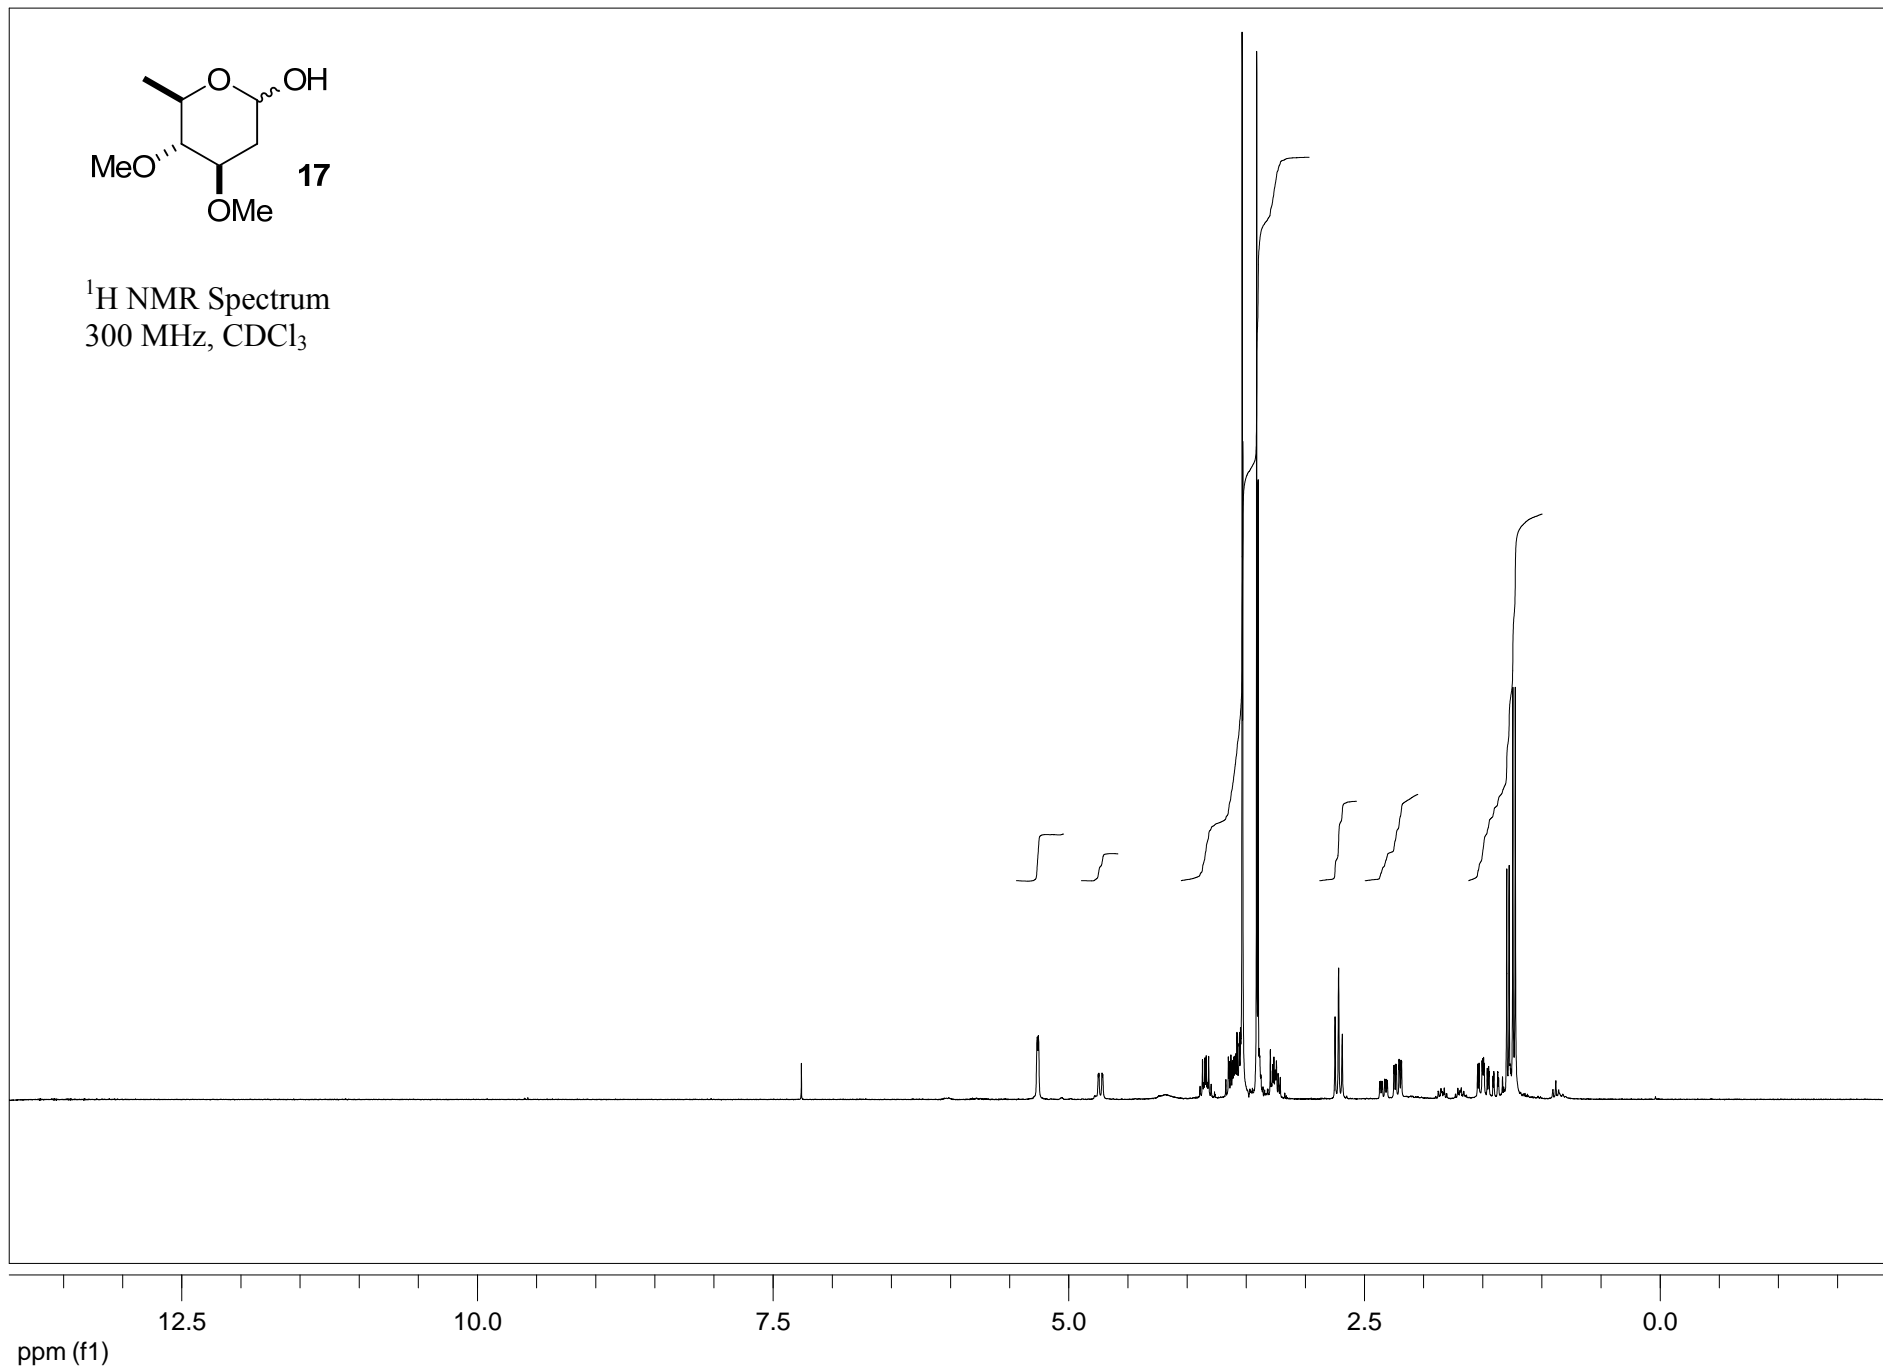

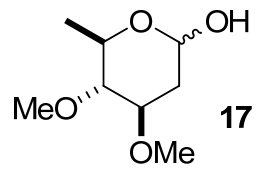

<sup>1</sup>H NMR Spectrum  
300 MHz, CDCl<sub>3</sub>

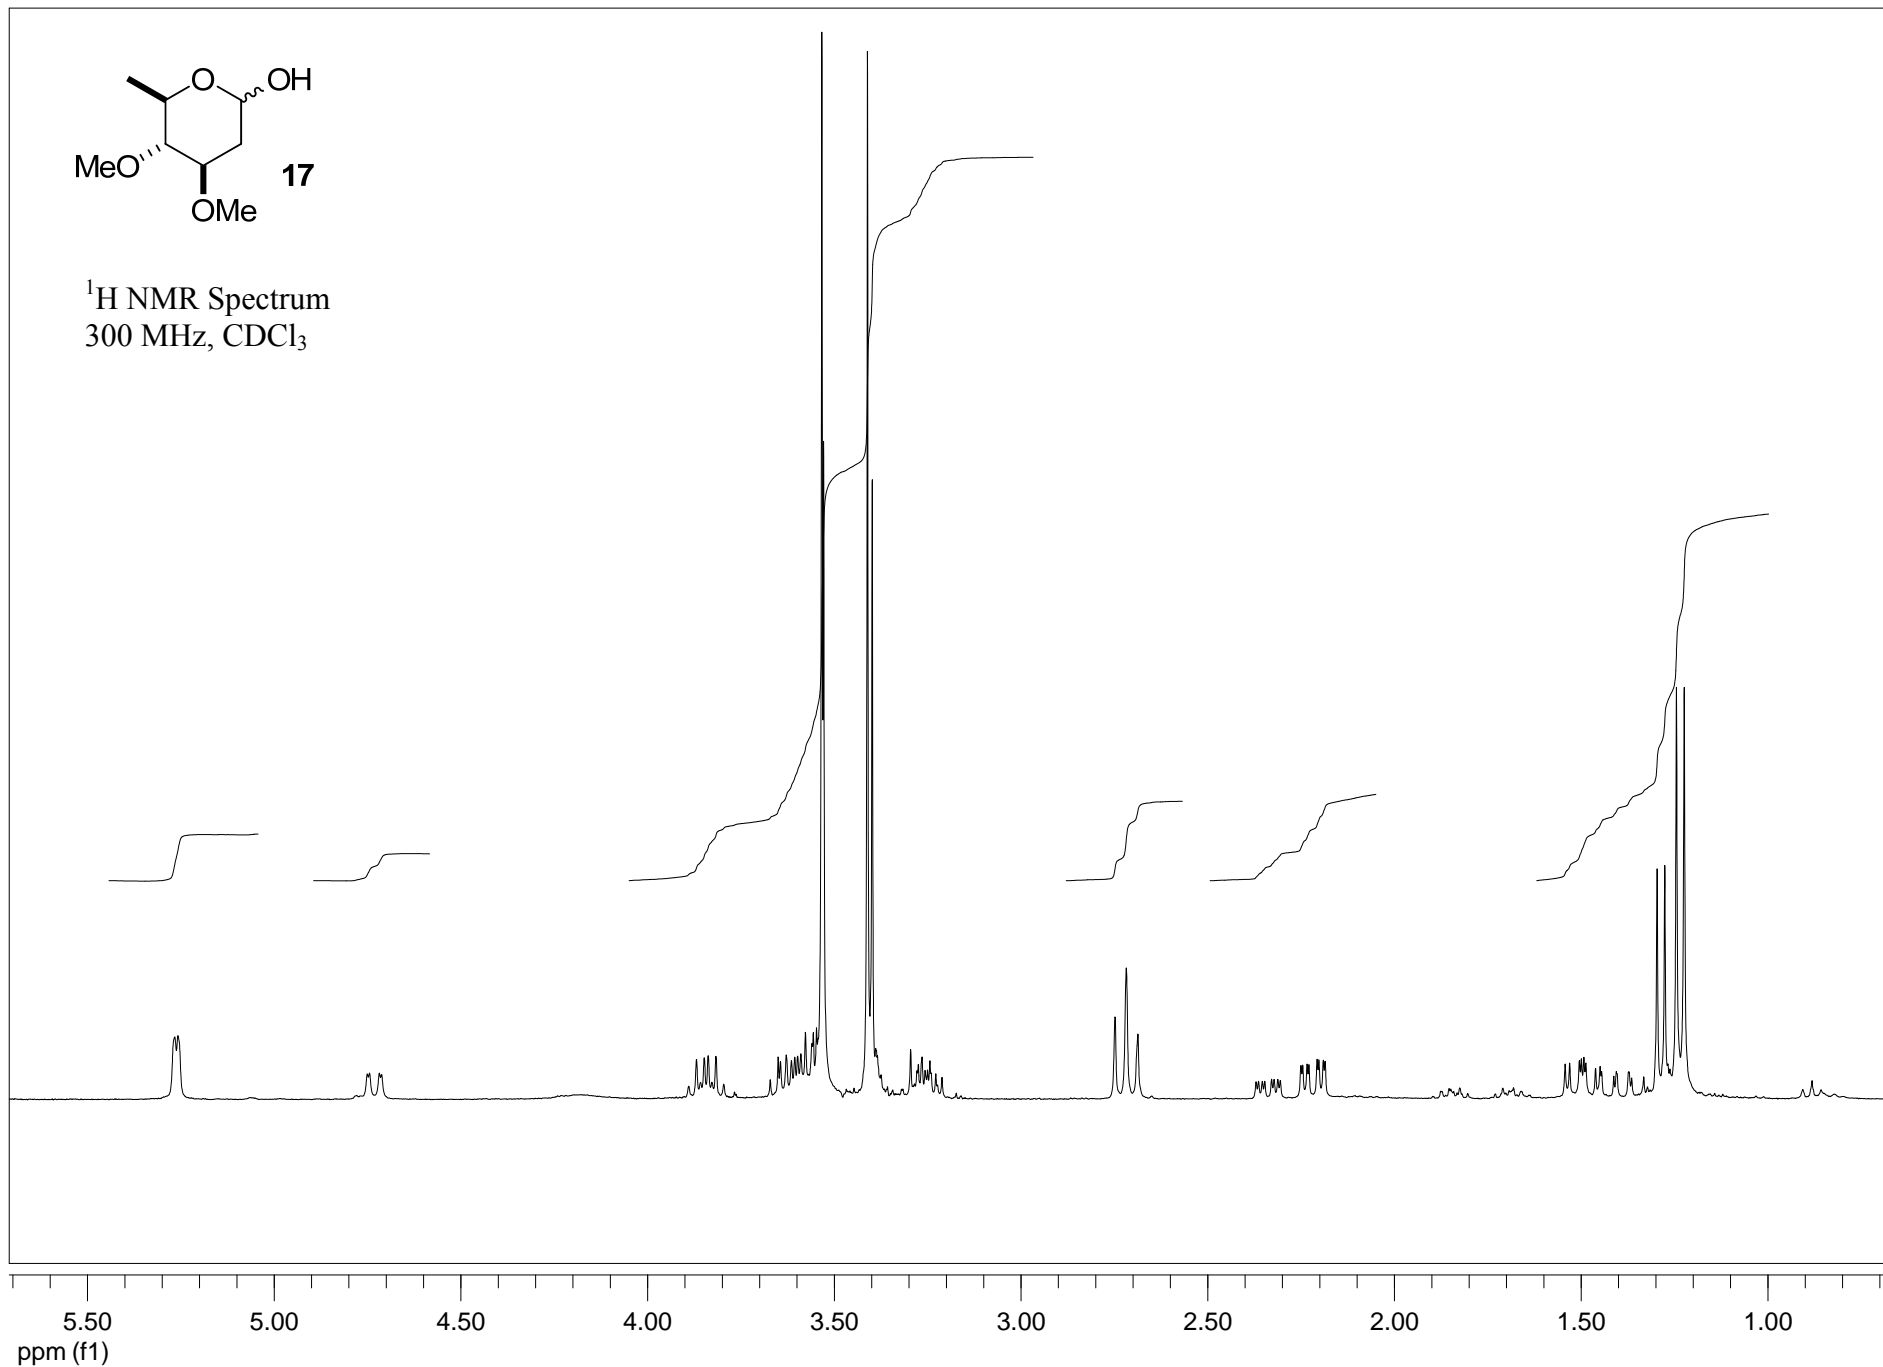

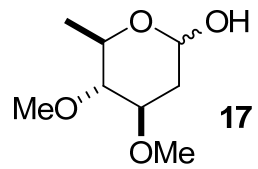

DEPT 135 Spectrum  
75 MHz, CDCl<sub>3</sub>

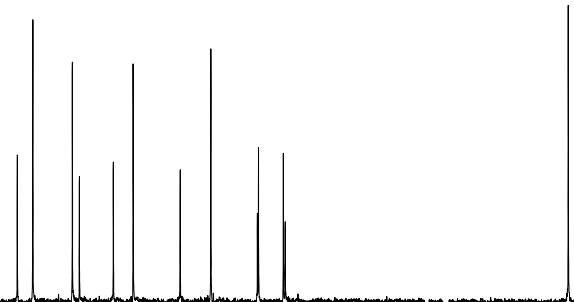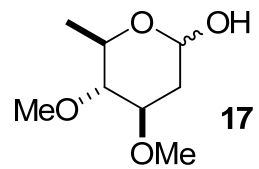

<sup>13</sup>C NMR Spectrum  
75 MHz, CDCl<sub>3</sub>

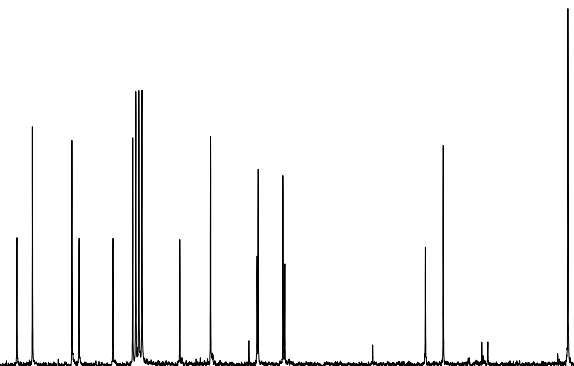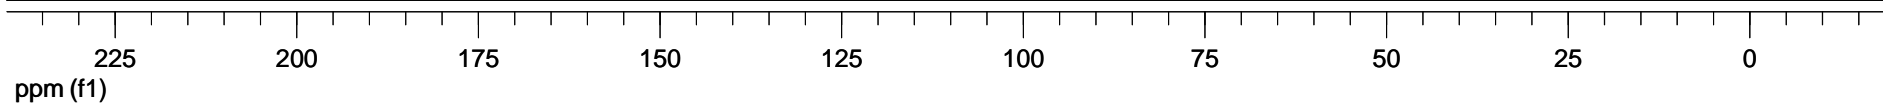

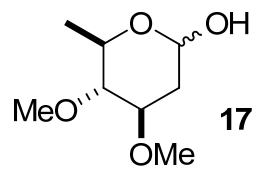

COSY Spectrum  
300 MHz, CDCl<sub>3</sub>

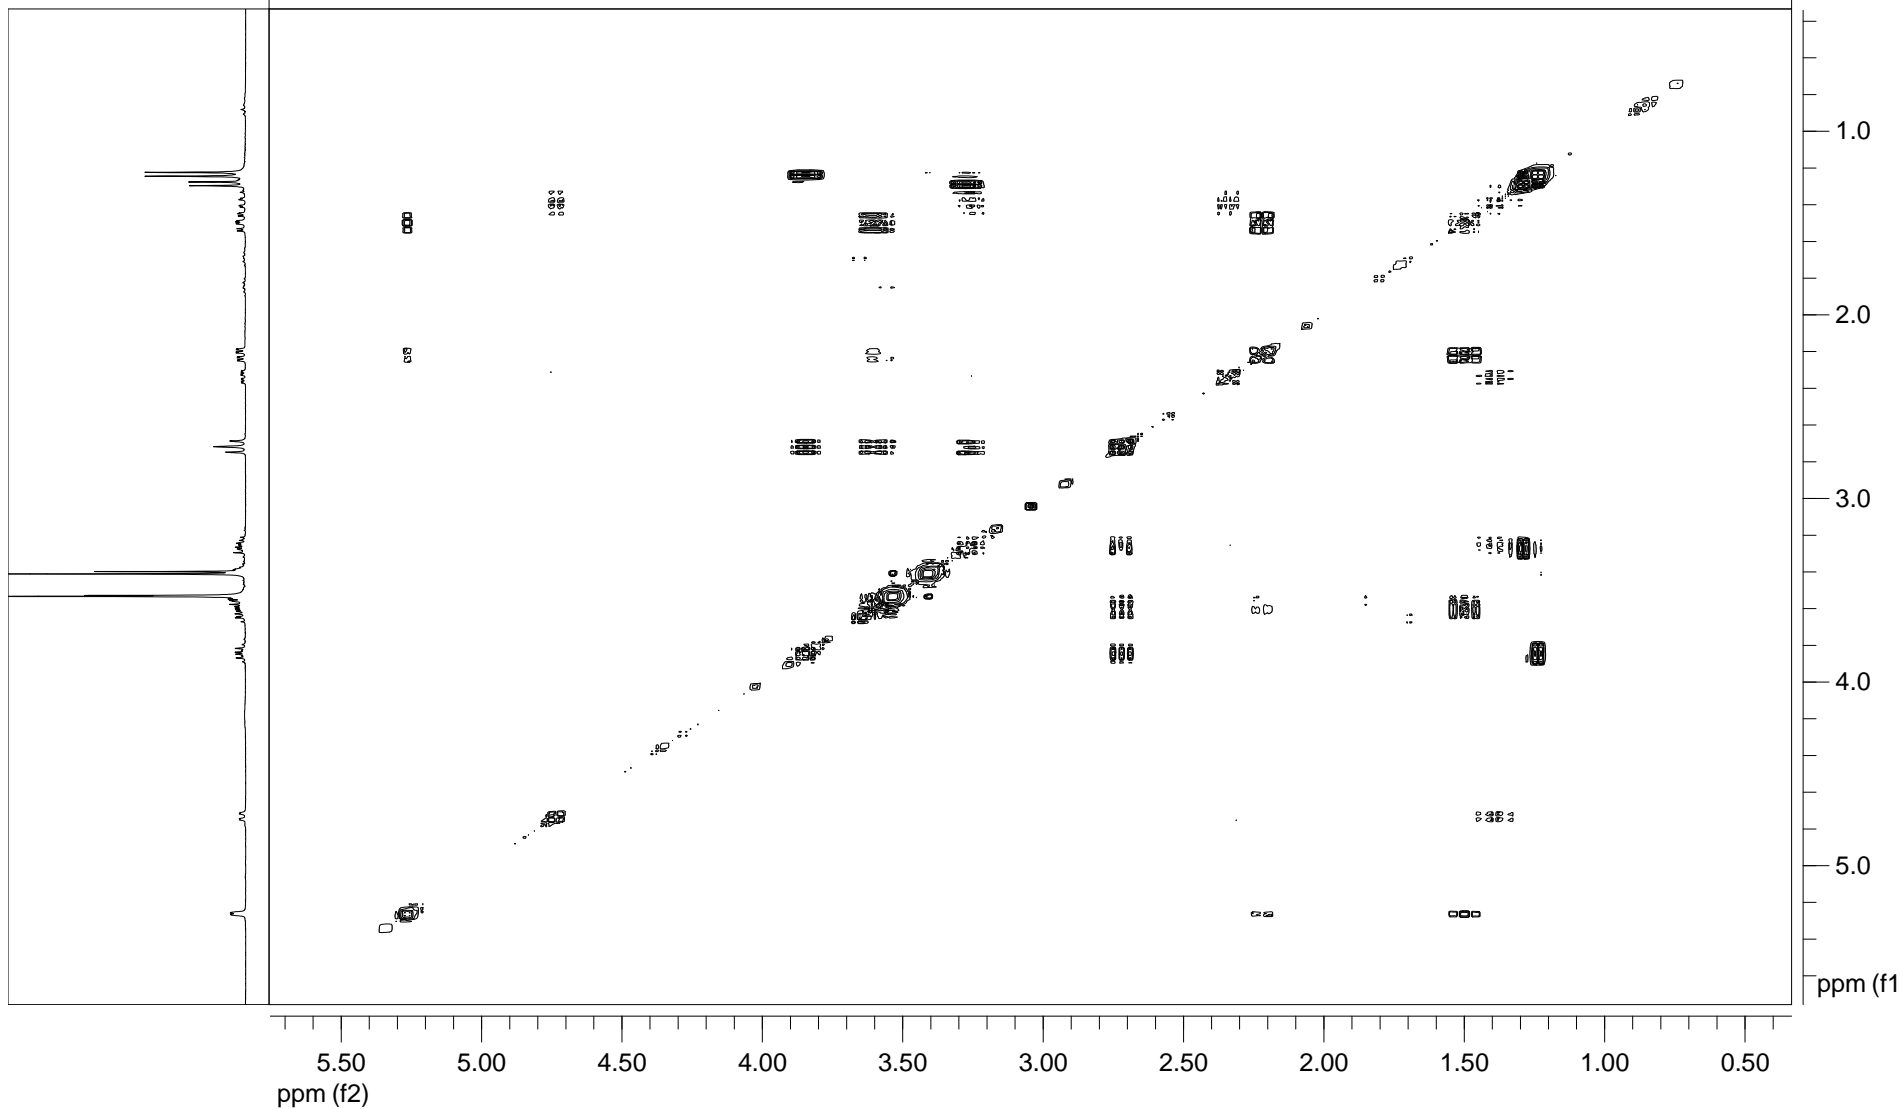

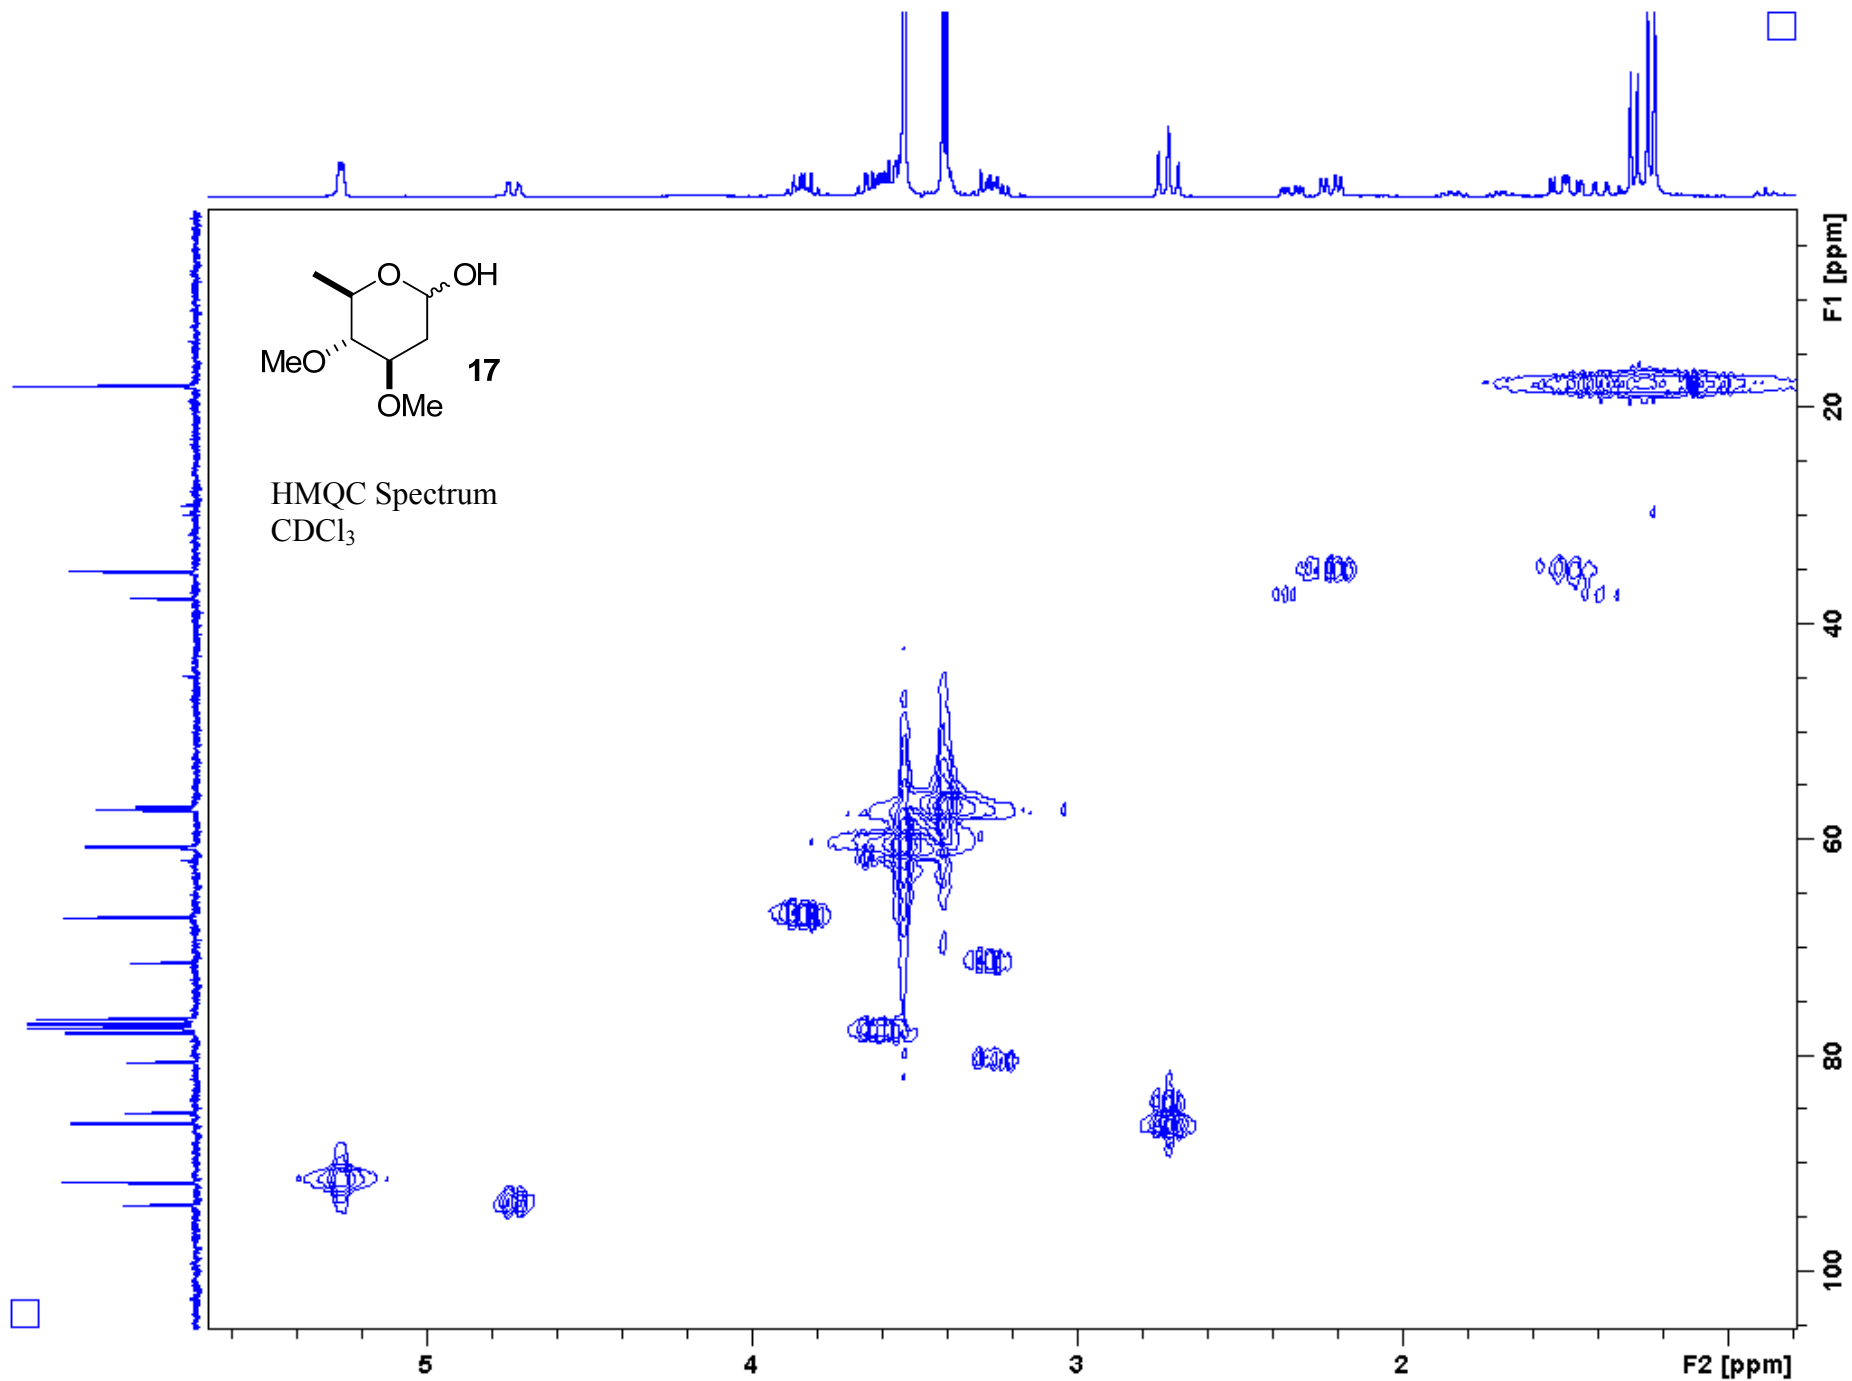



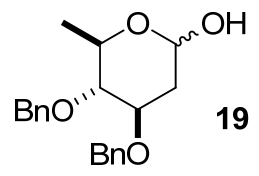

<sup>1</sup>H NMR Spectrum  
300 MHz, CDCl<sub>3</sub>

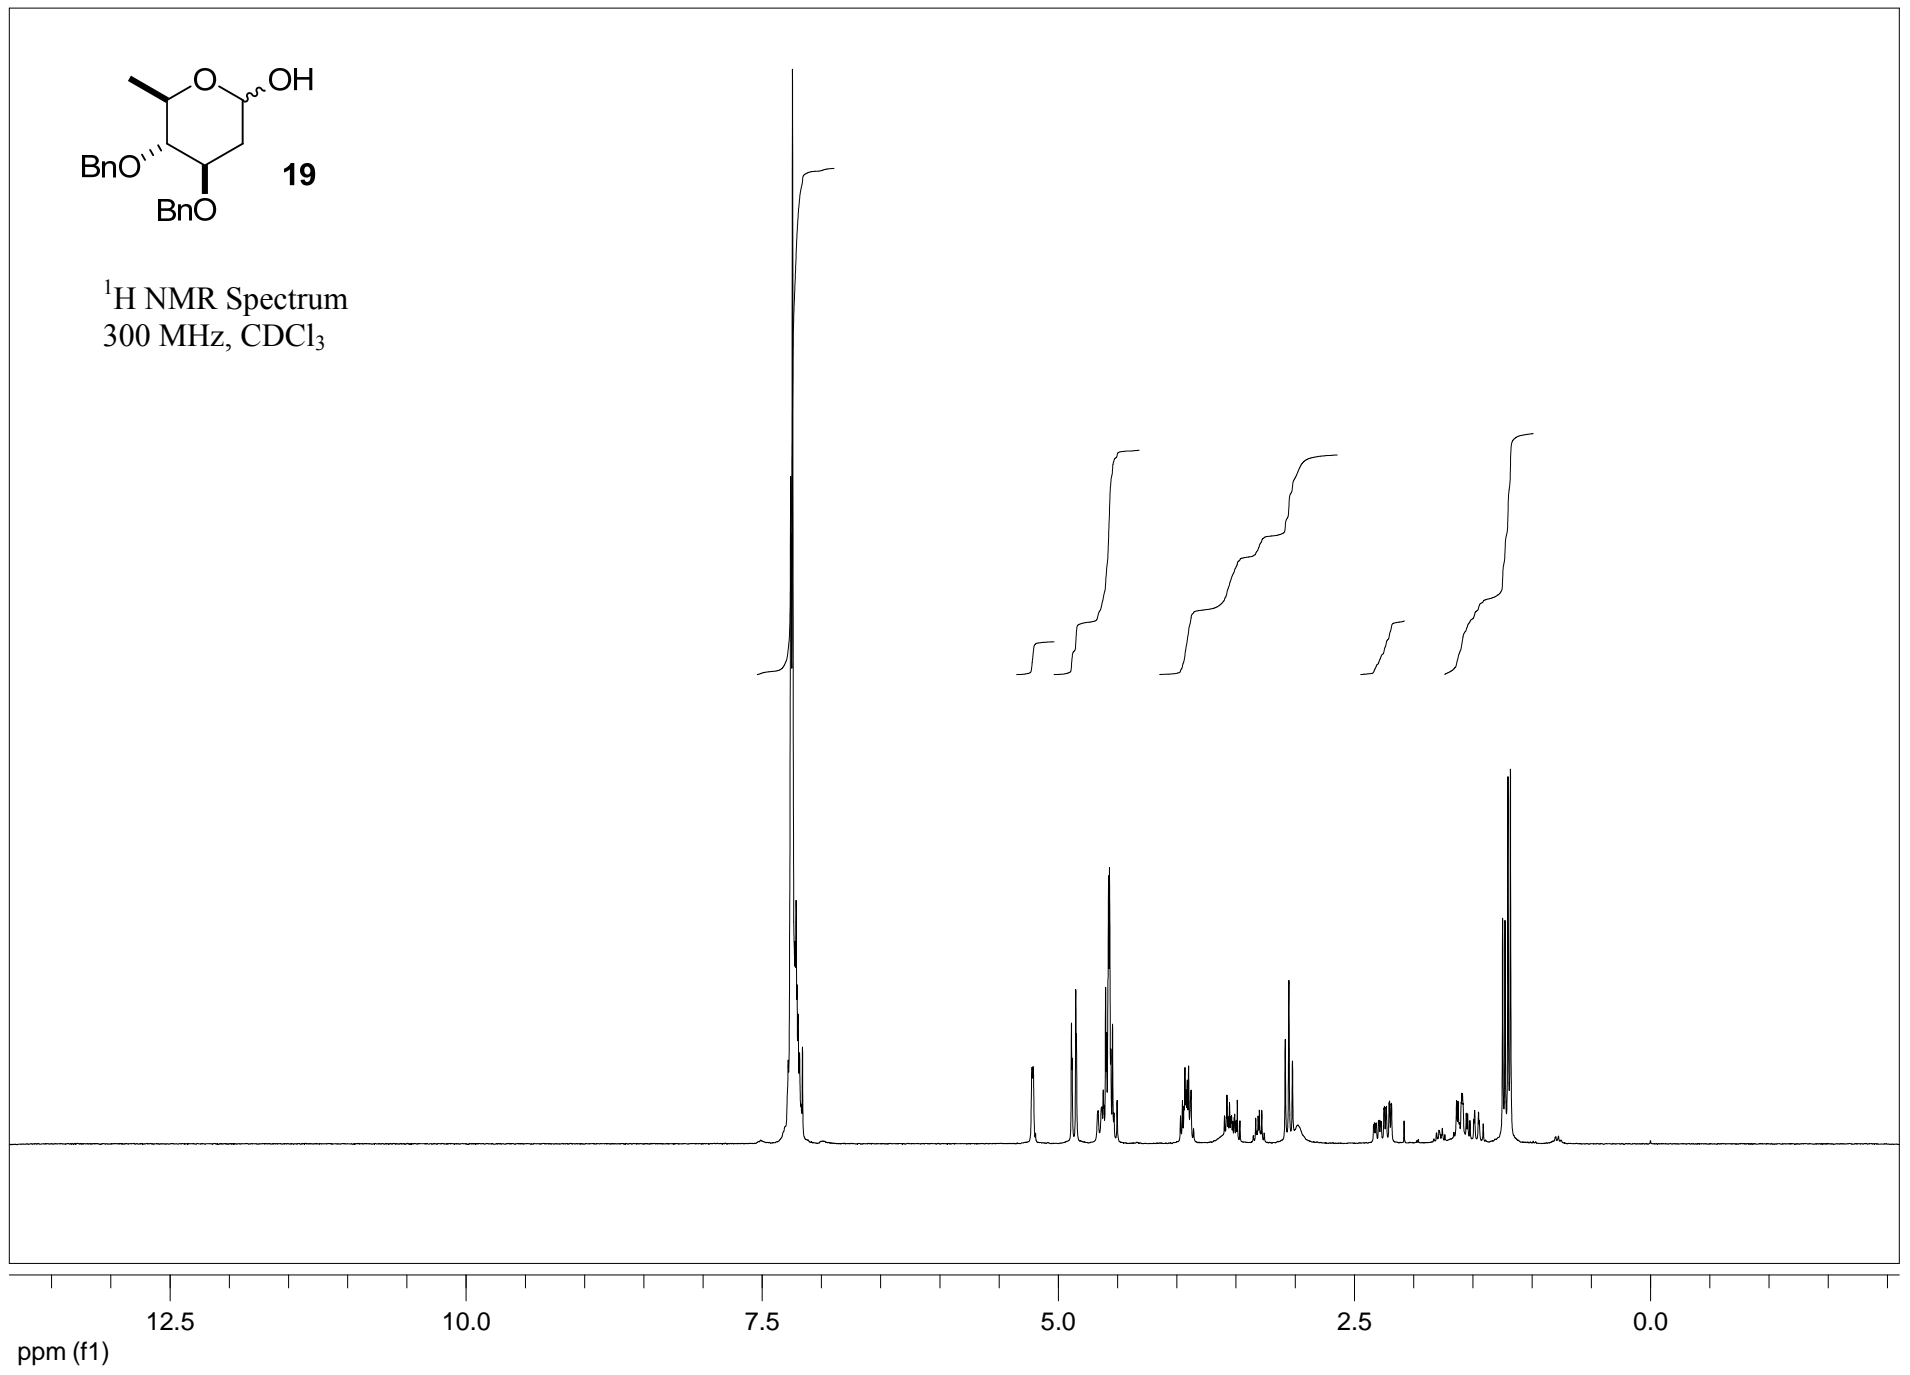

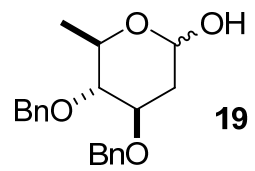

$^1\text{H}$  NMR Spectrum  
300 MHz,  $\text{CDCl}_3$

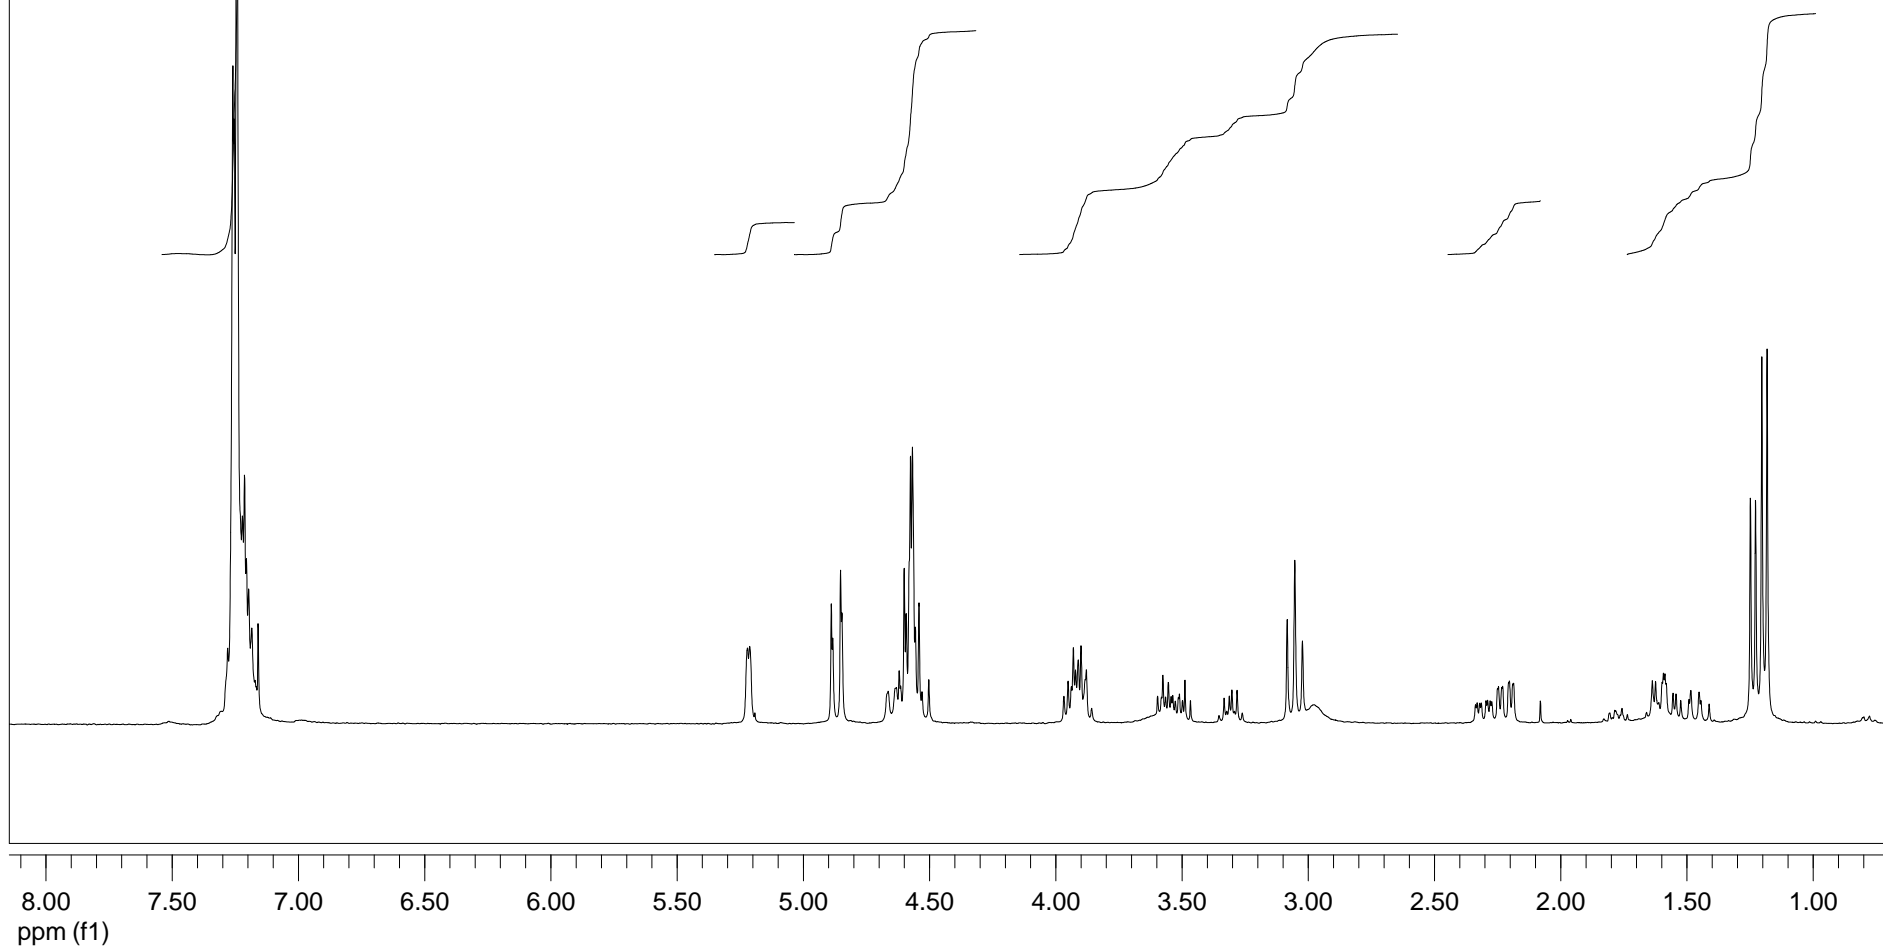

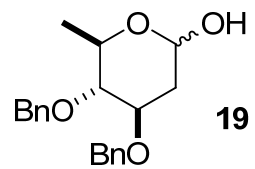

DEPT 135 Spectrum  
75 MHz, CDCl<sub>3</sub>

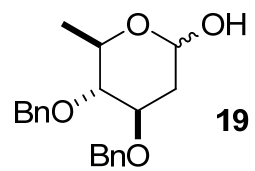

<sup>13</sup>C NMR Spectrum  
75 MHz, CDCl<sub>3</sub>

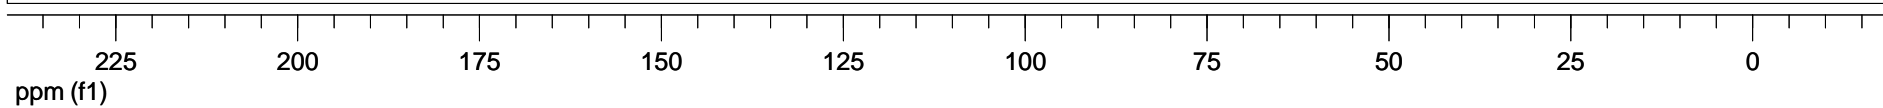

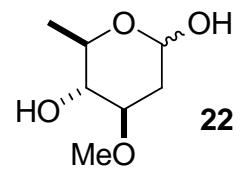

$^1\text{H}$  NMR Spectrum  
300 MHz,  $\text{CDCl}_3$

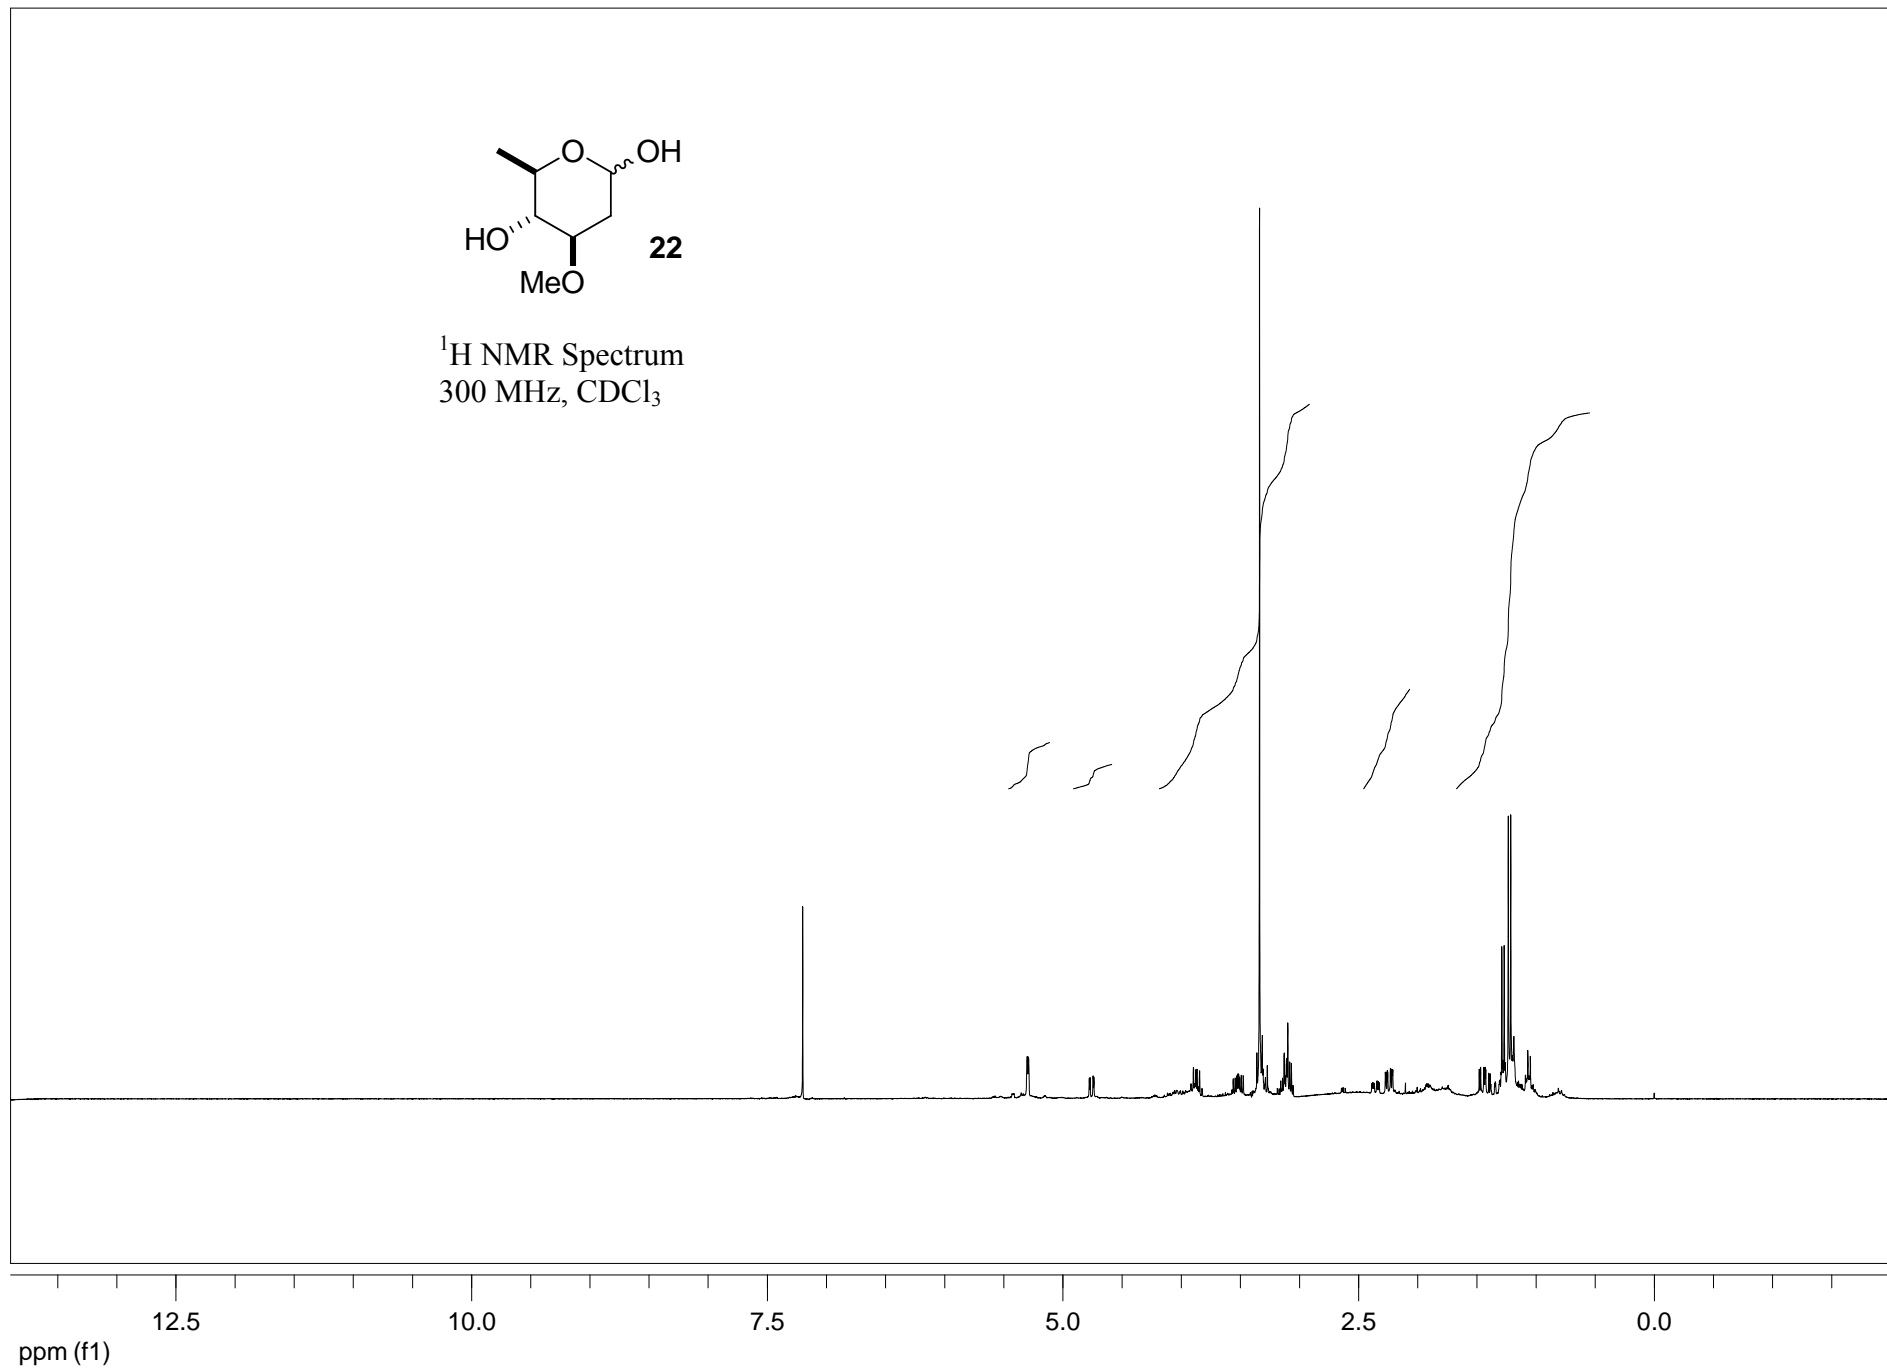

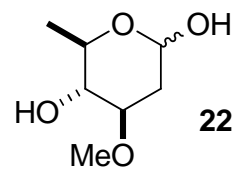

$^1\text{H}$  NMR Spectrum  
300 MHz,  $\text{CDCl}_3$

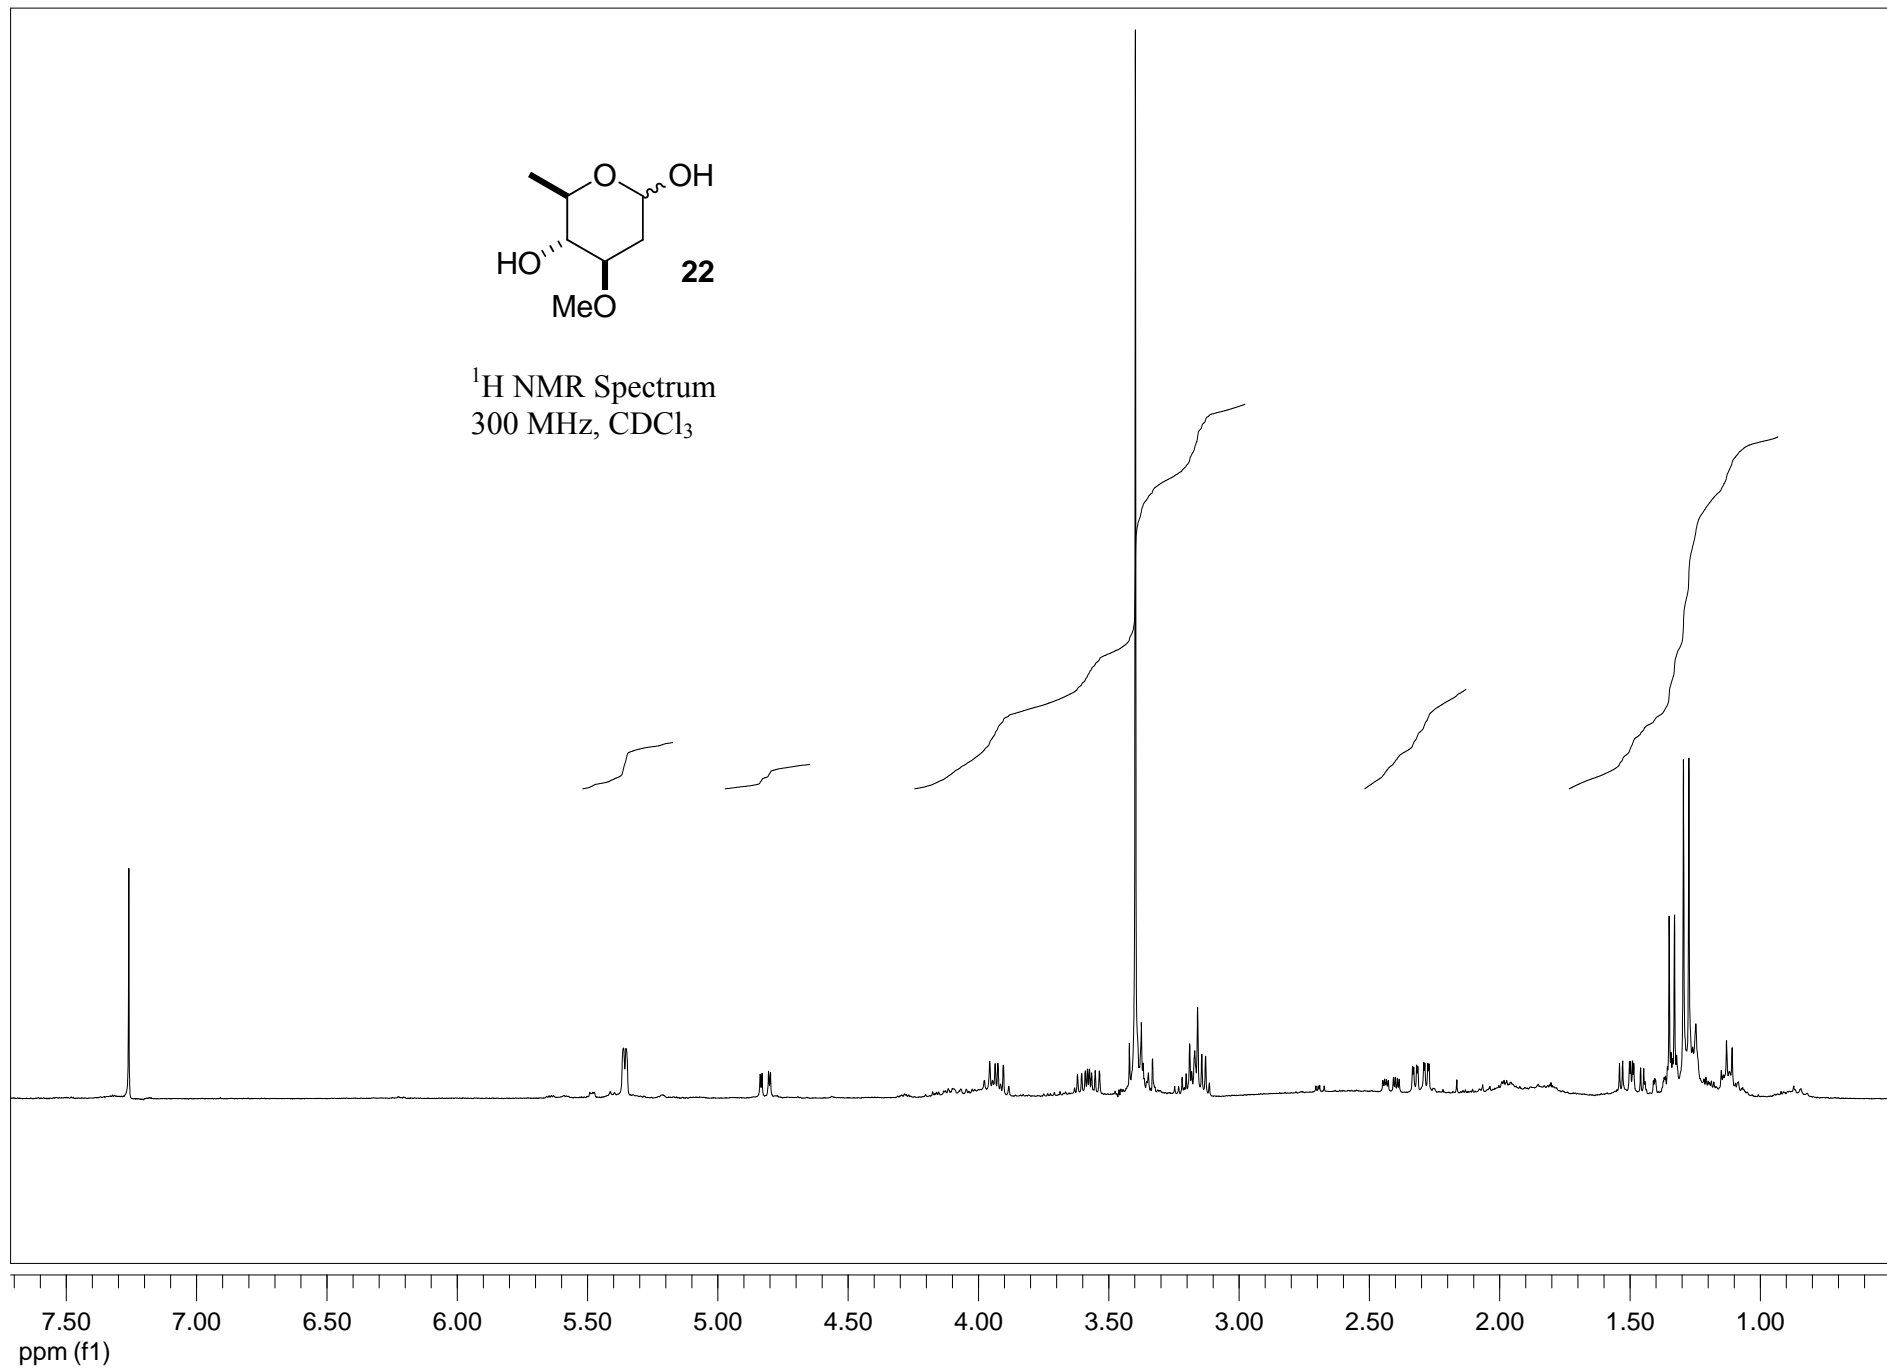

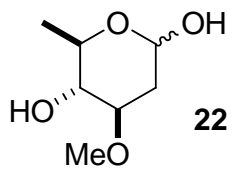

DEPT 135 Spectrum  
75 MHz, CDCl<sub>3</sub>

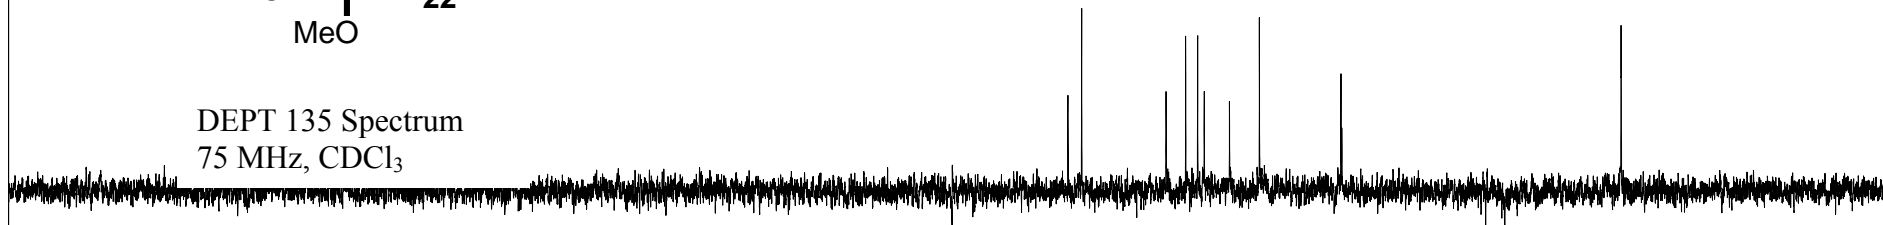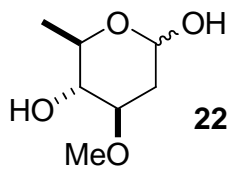

<sup>13</sup>C NMR Spectrum  
75 MHz, CDCl<sub>3</sub>

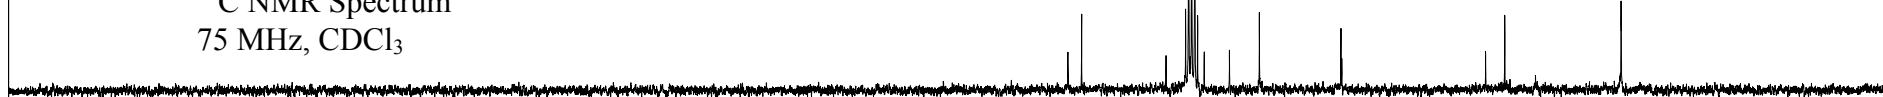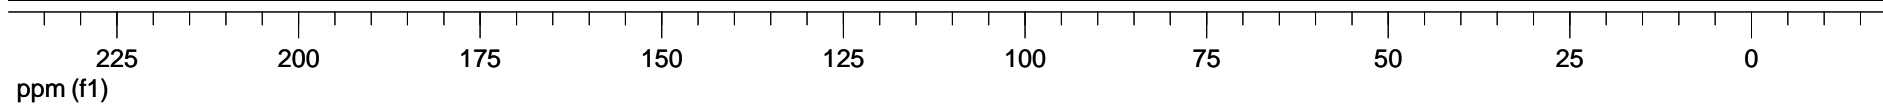

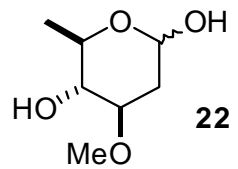

COSY Spectrum  
300 MHz, CDCl<sub>3</sub>

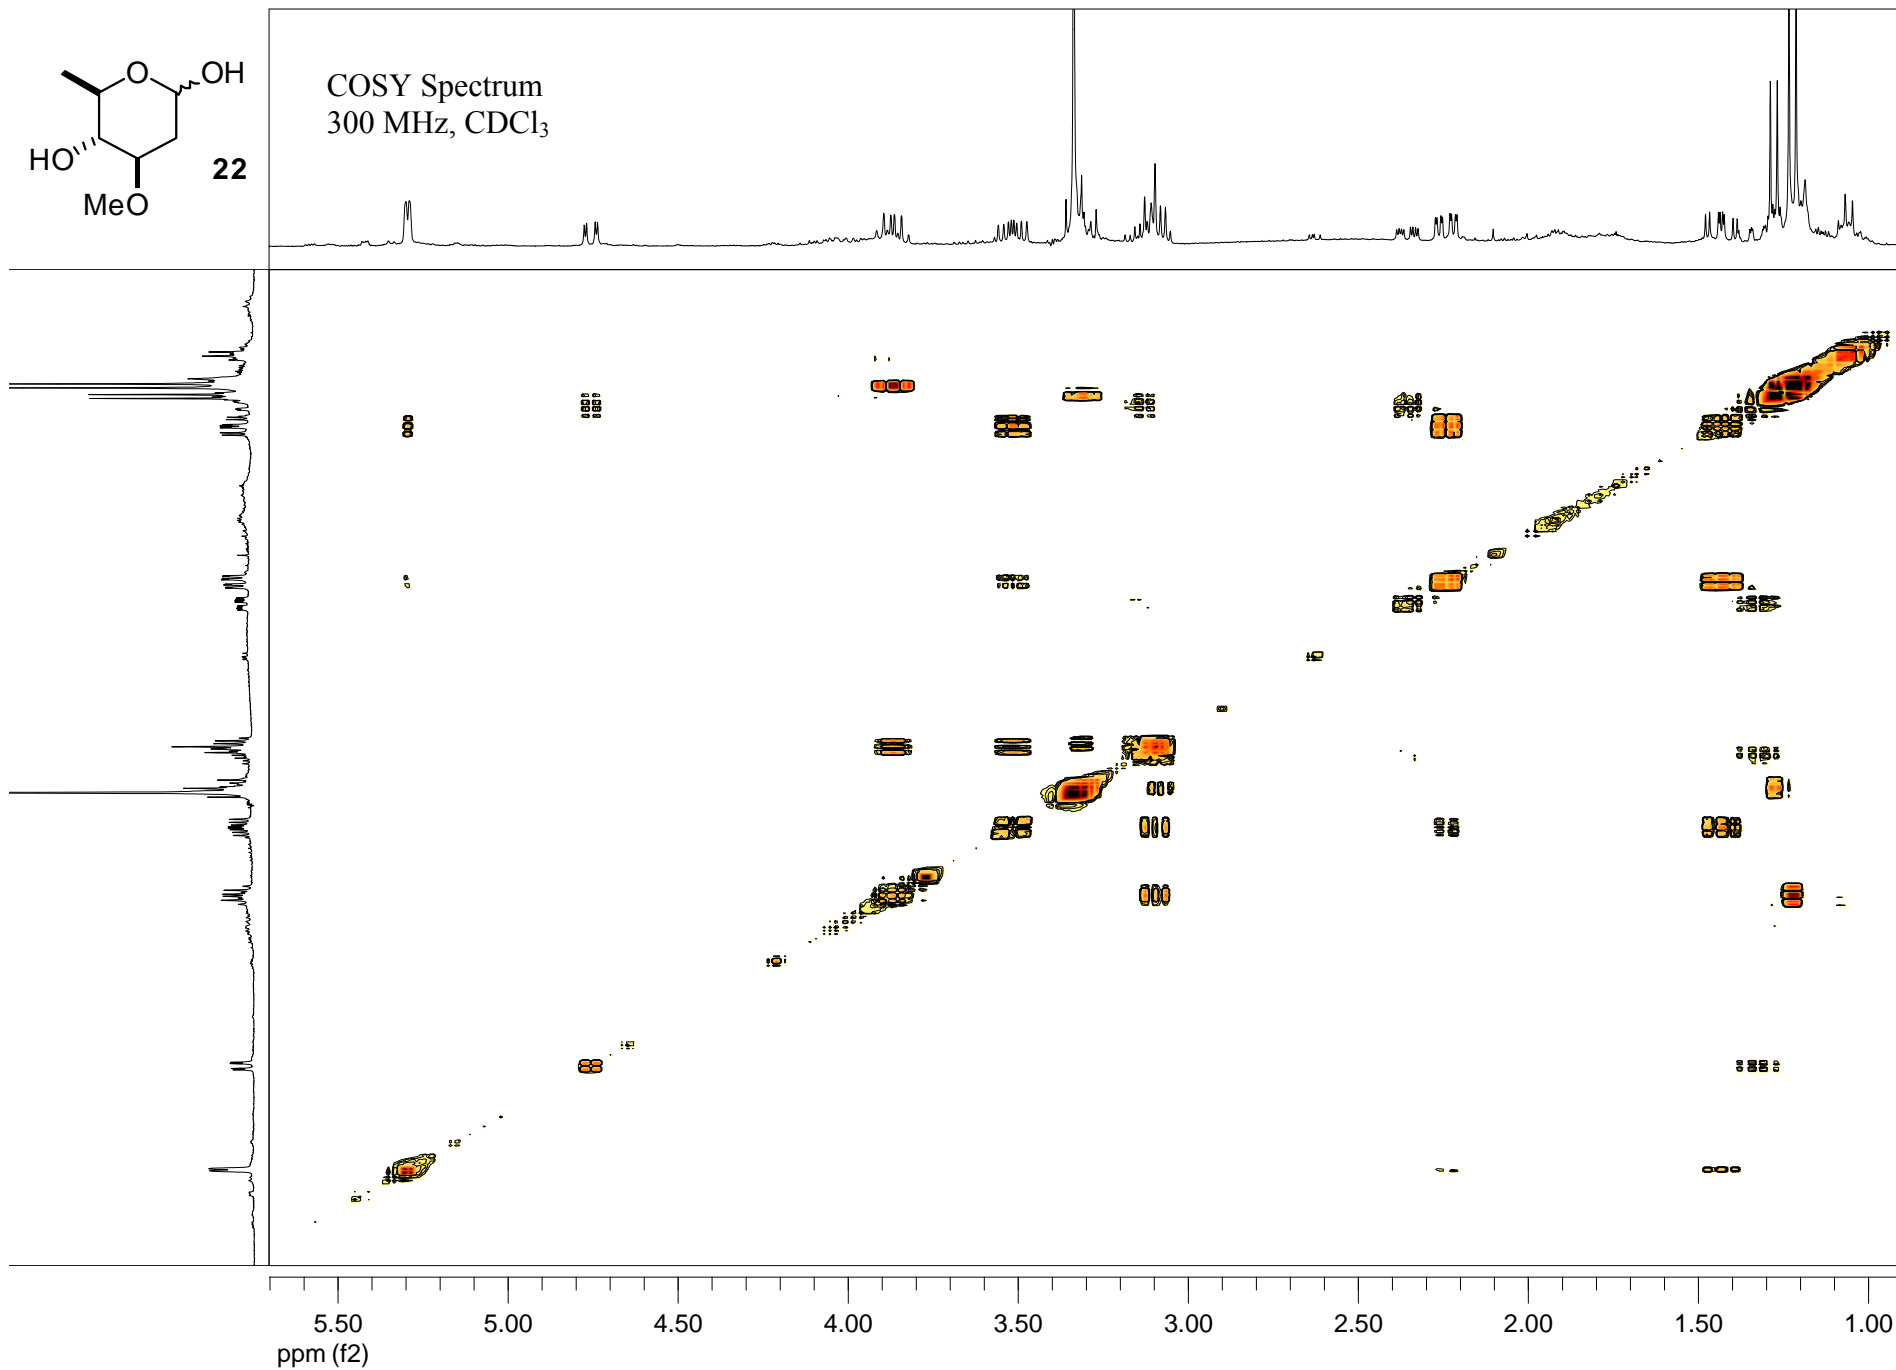

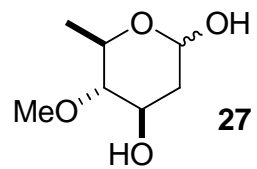

<sup>1</sup>H NMR Spectrum  
300 MHz, CDCl<sub>3</sub>

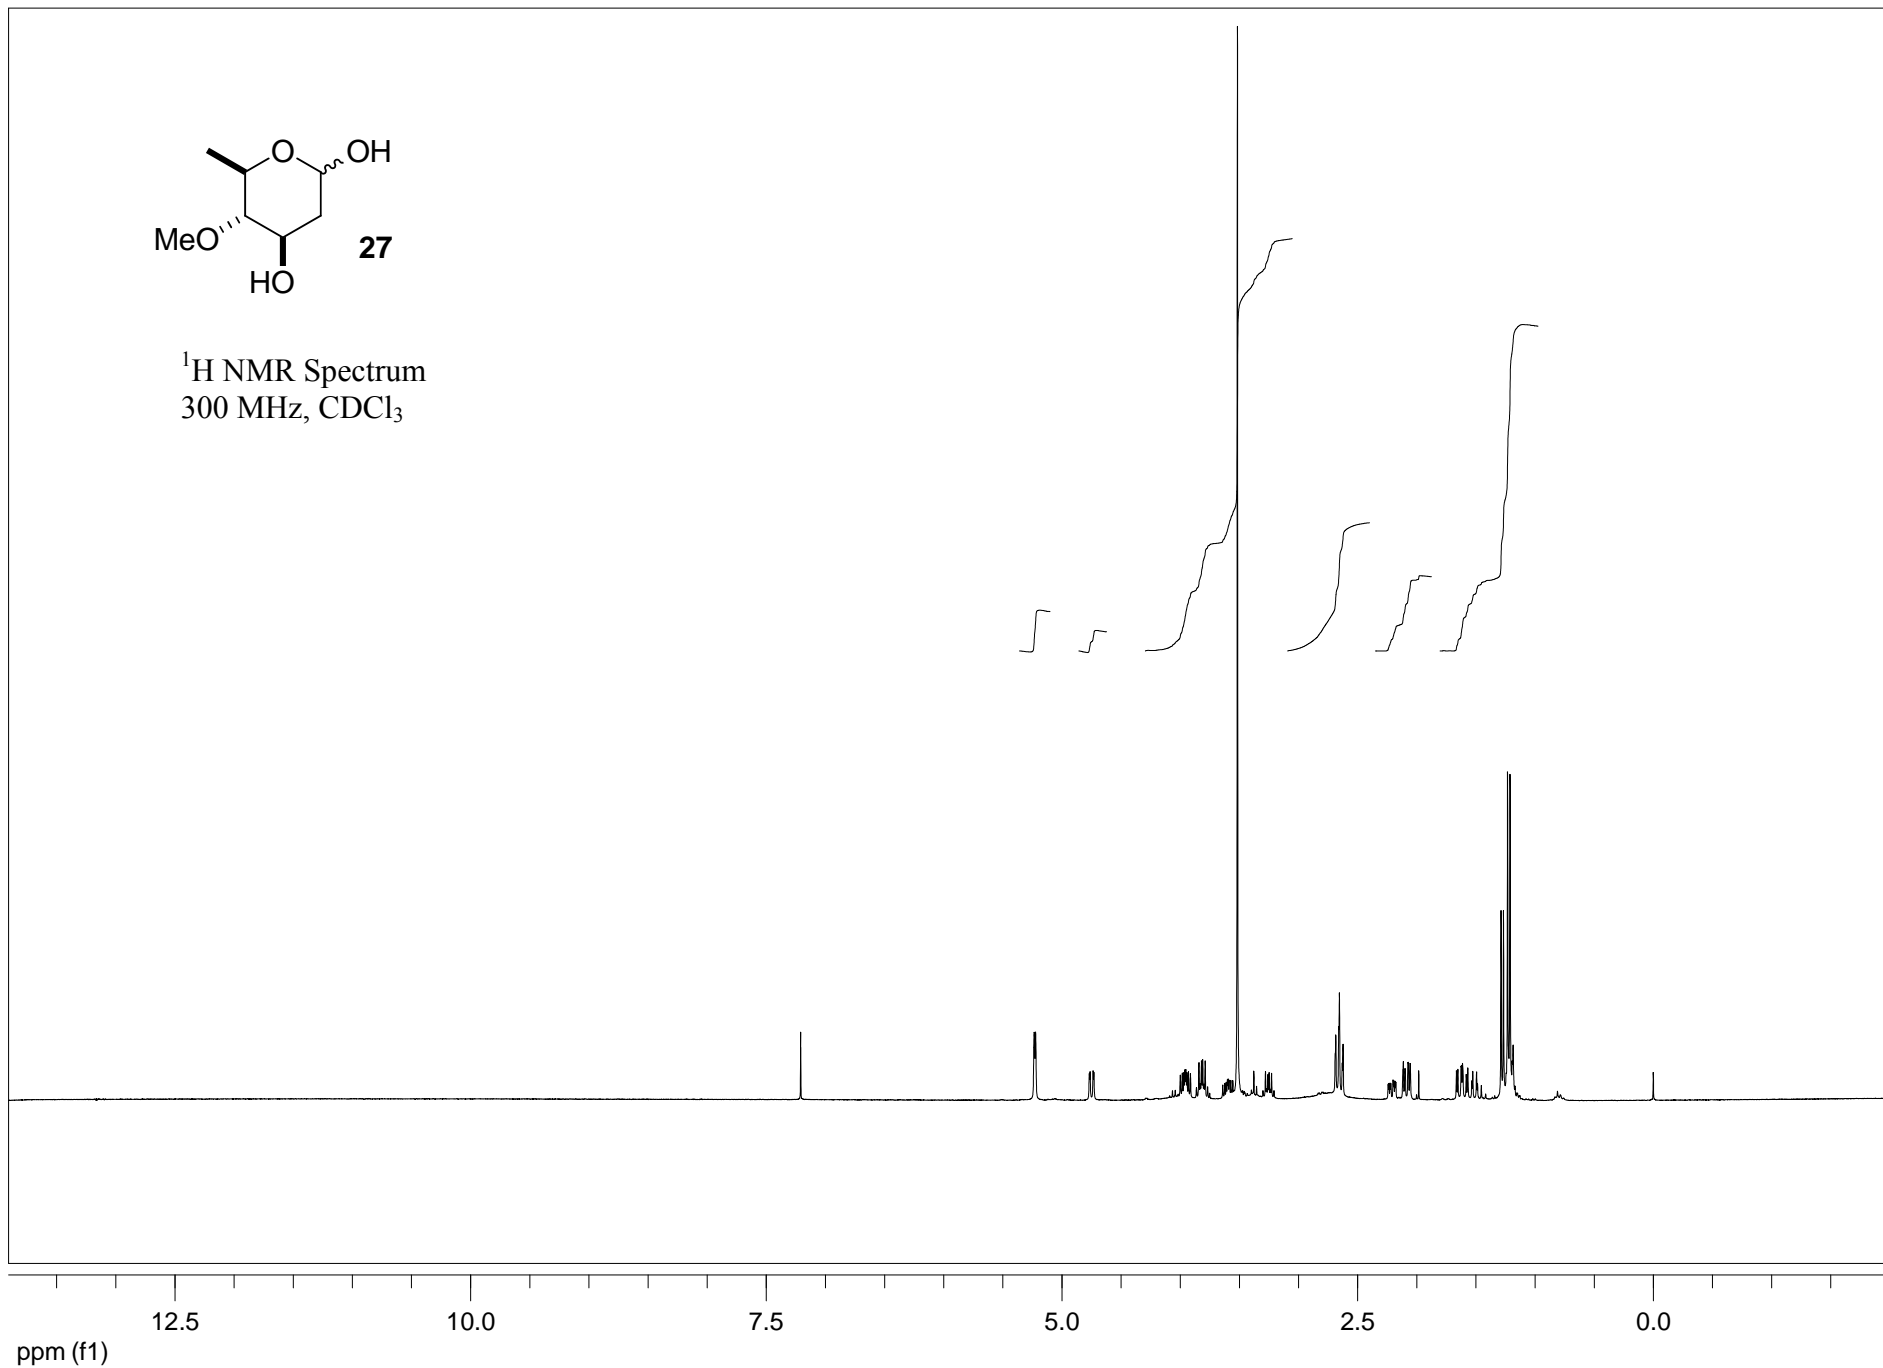



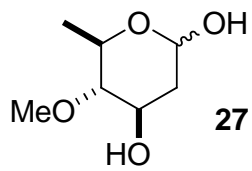

$^1\text{H}$  NMR Spectrum  
300 MHz,  $\text{CDCl}_3$

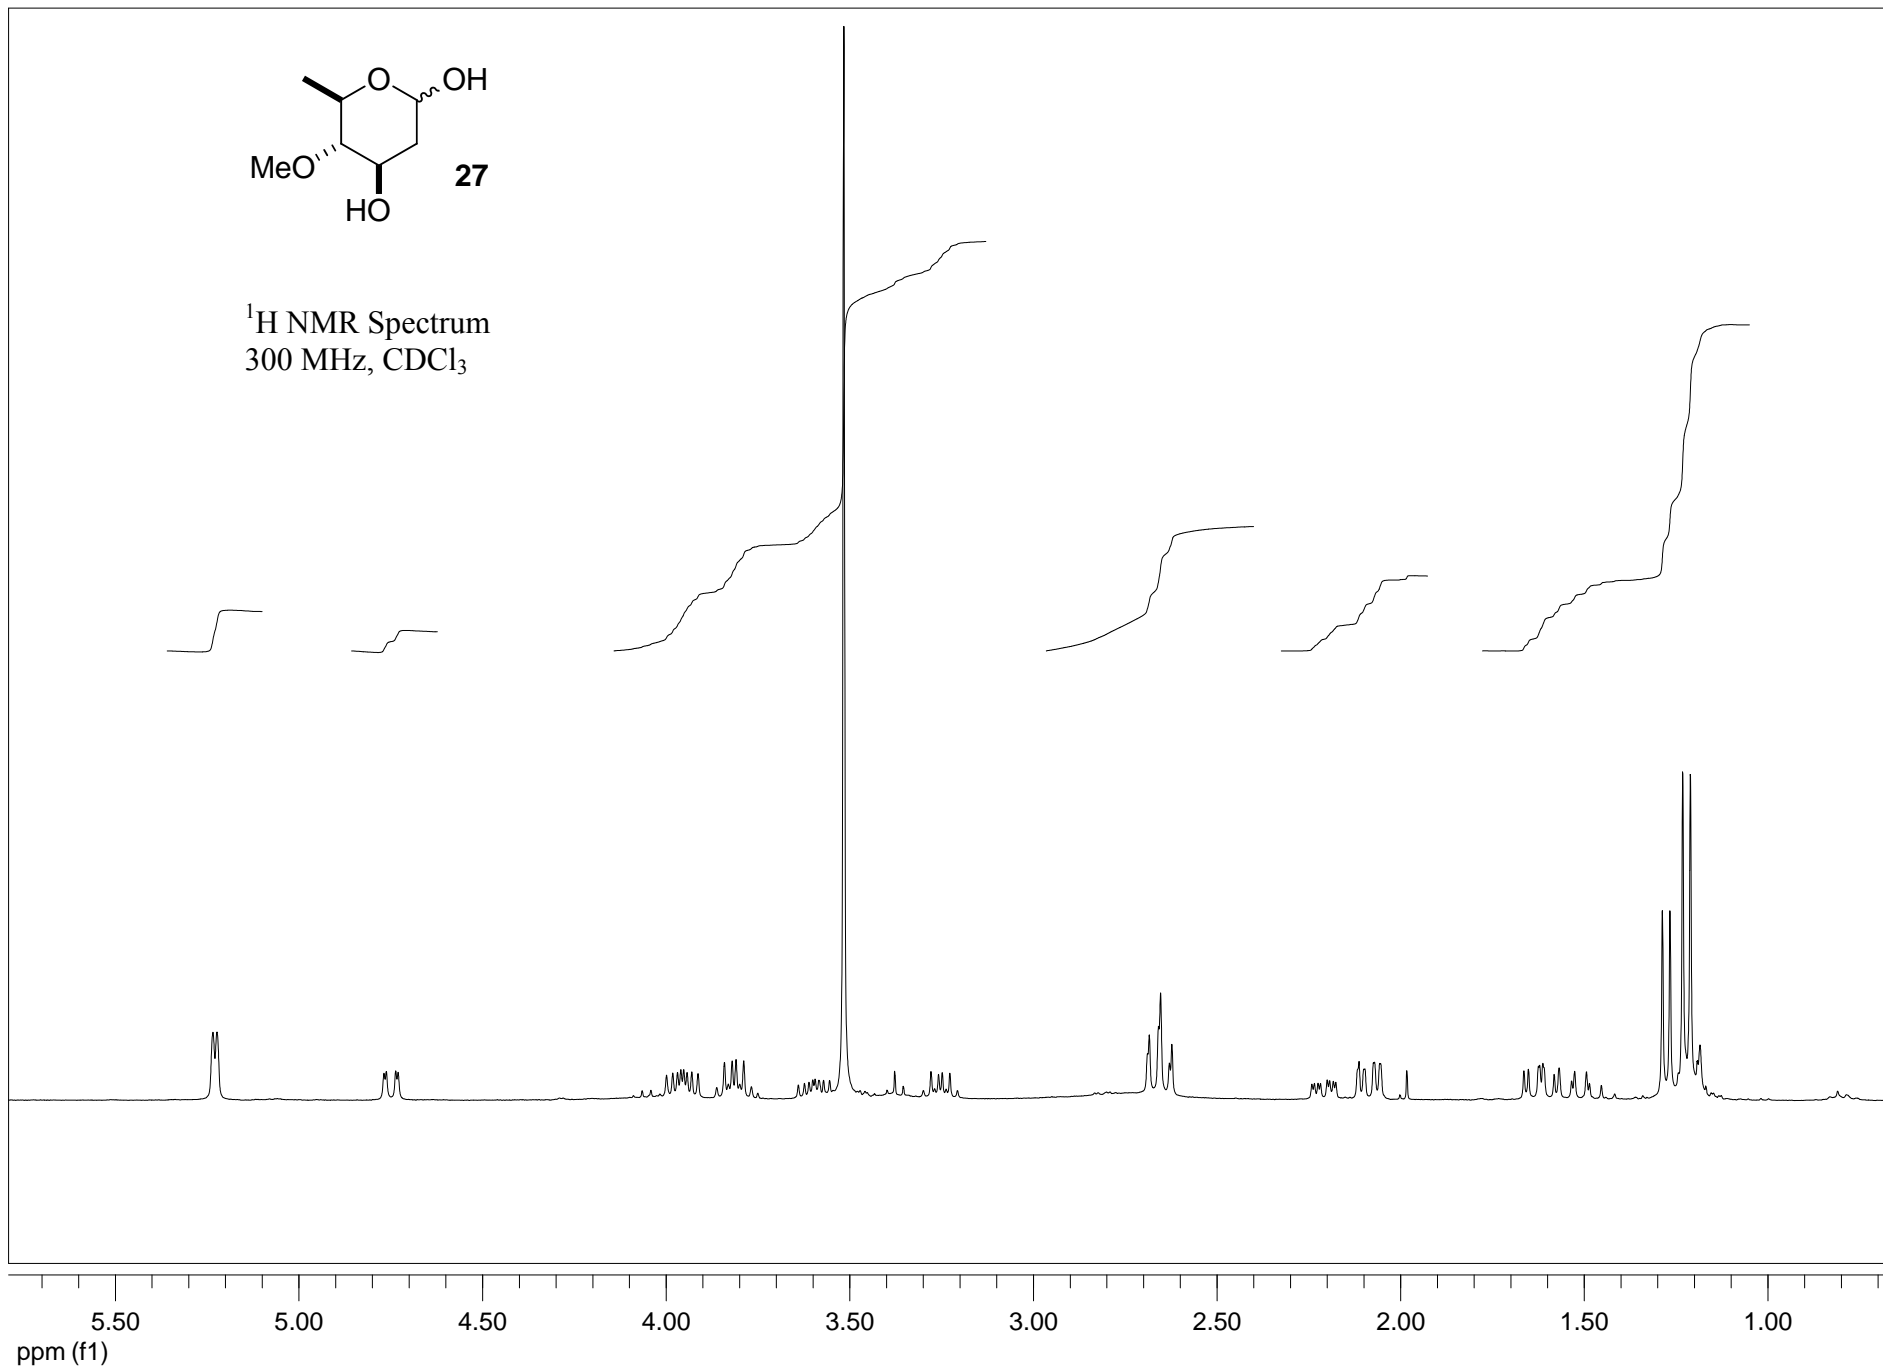



DEPT 135 Spectrum  
75 MHz, CDCl<sub>3</sub>

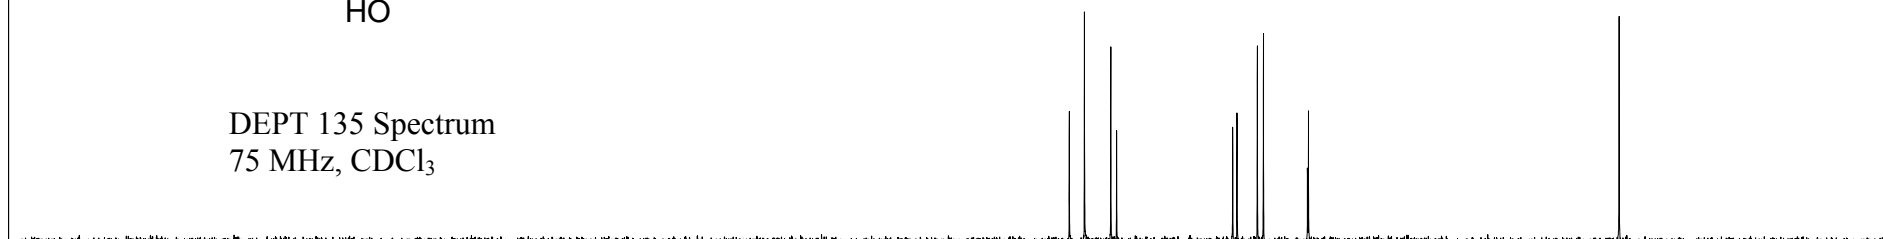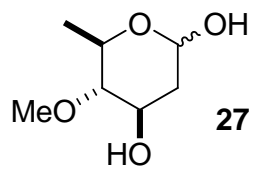

<sup>13</sup>C NMR Spectrum  
75 MHz, CDCl<sub>3</sub>

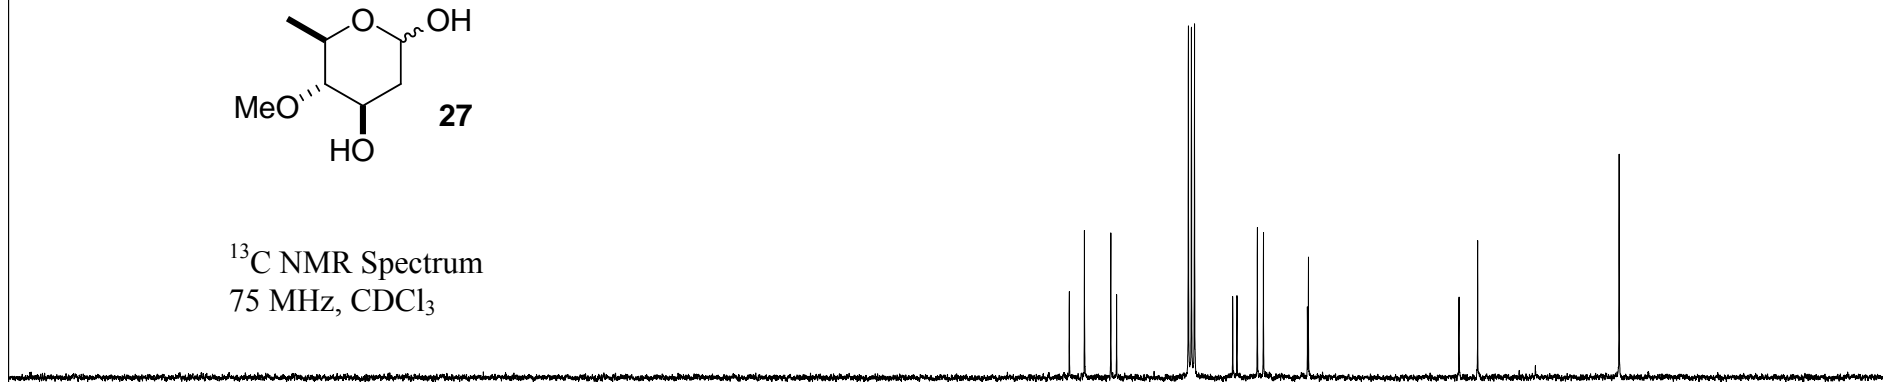

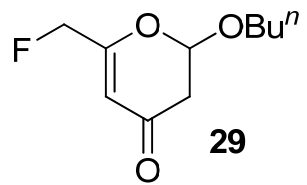

<sup>1</sup>H NMR Spectrum  
300 MHz, CDCl<sub>3</sub>

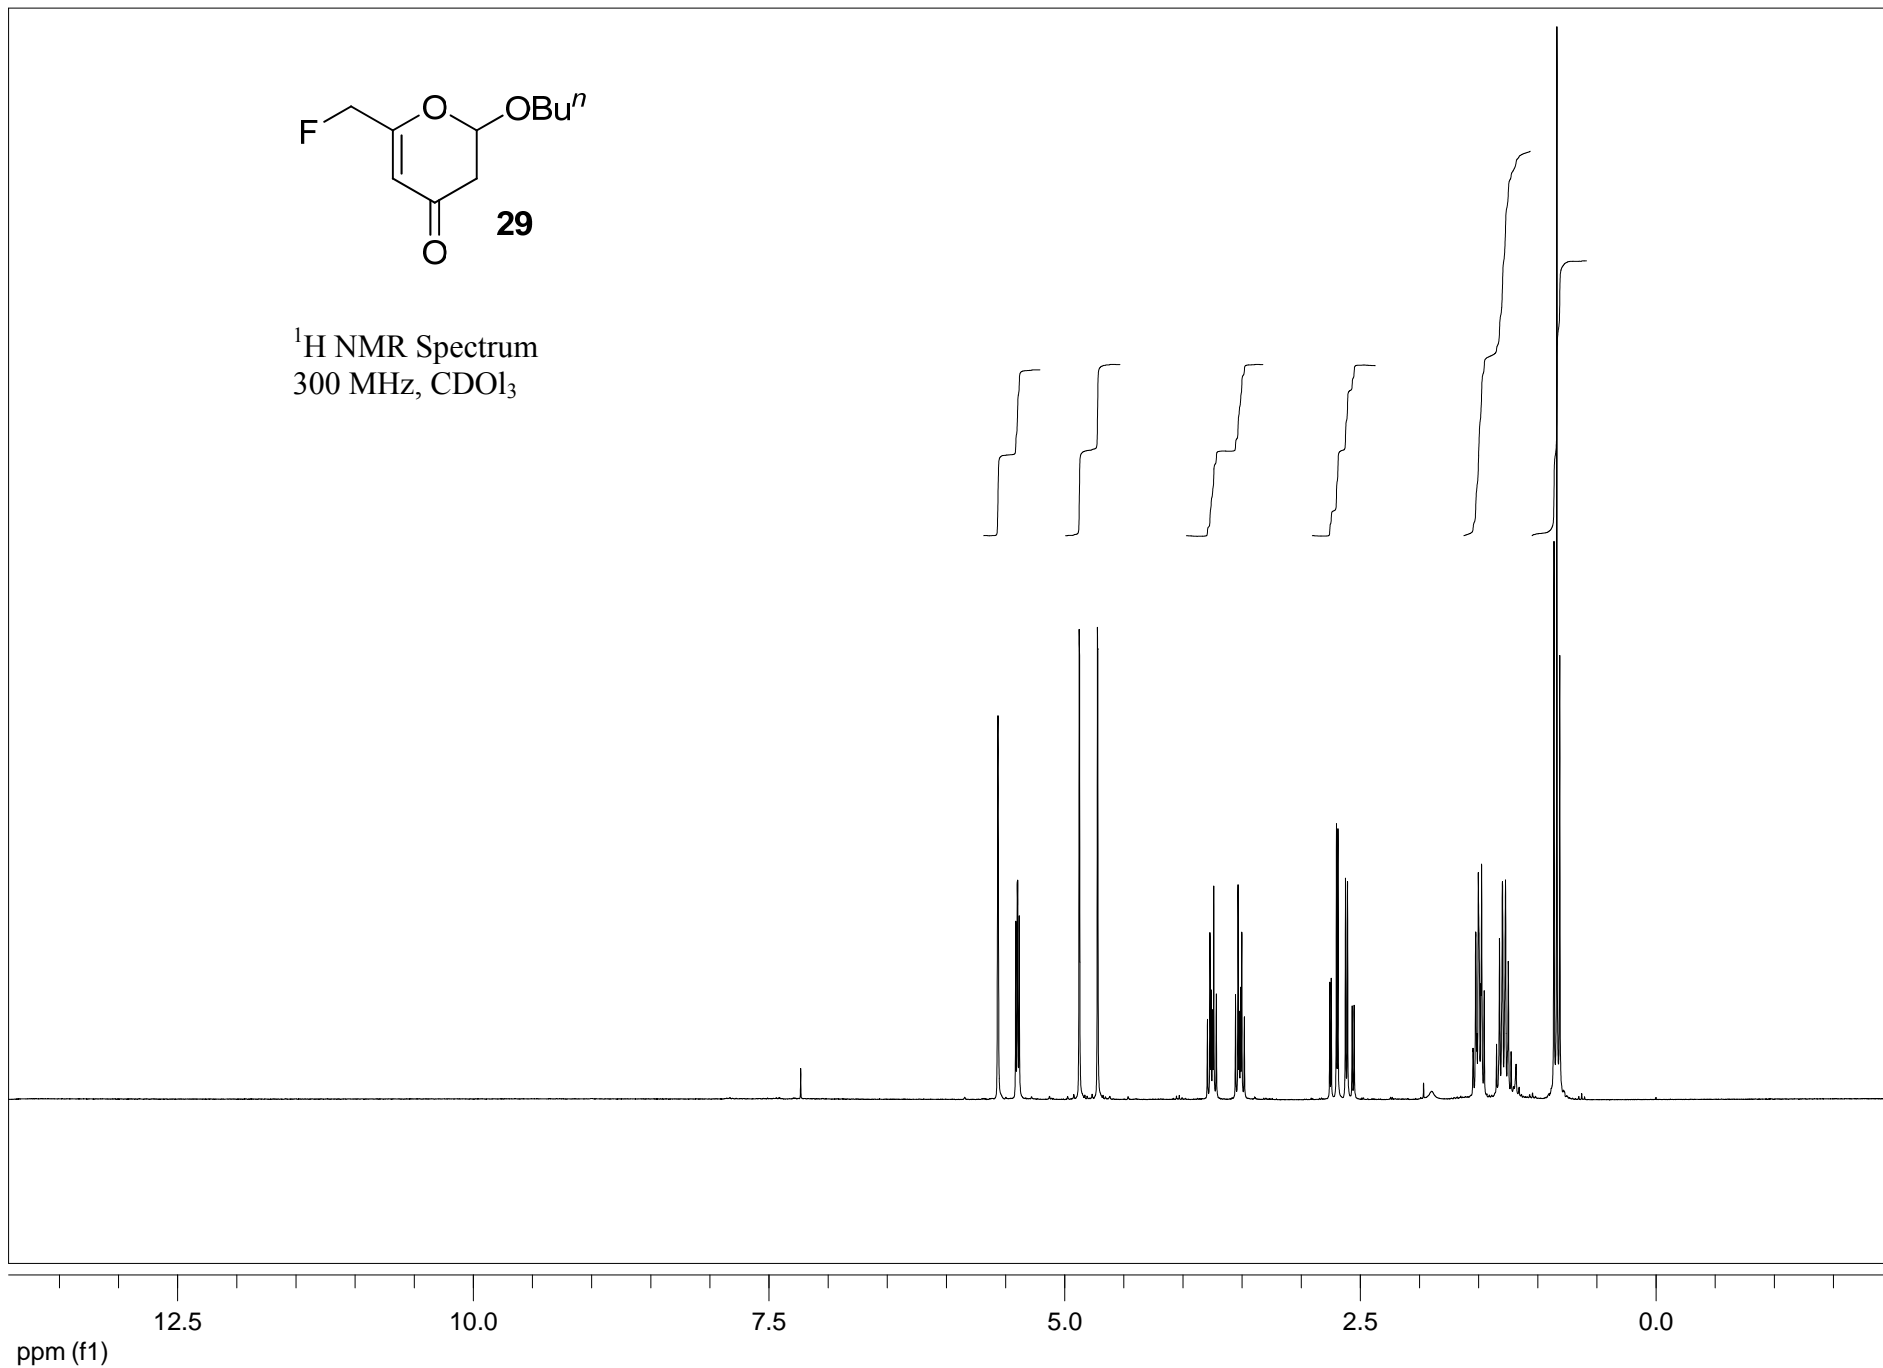

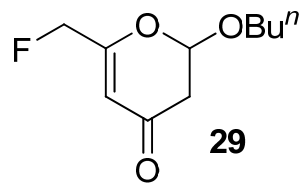

$^1\text{H}$  NMR Spectrum  
300 MHz,  $\text{CDCl}_3$

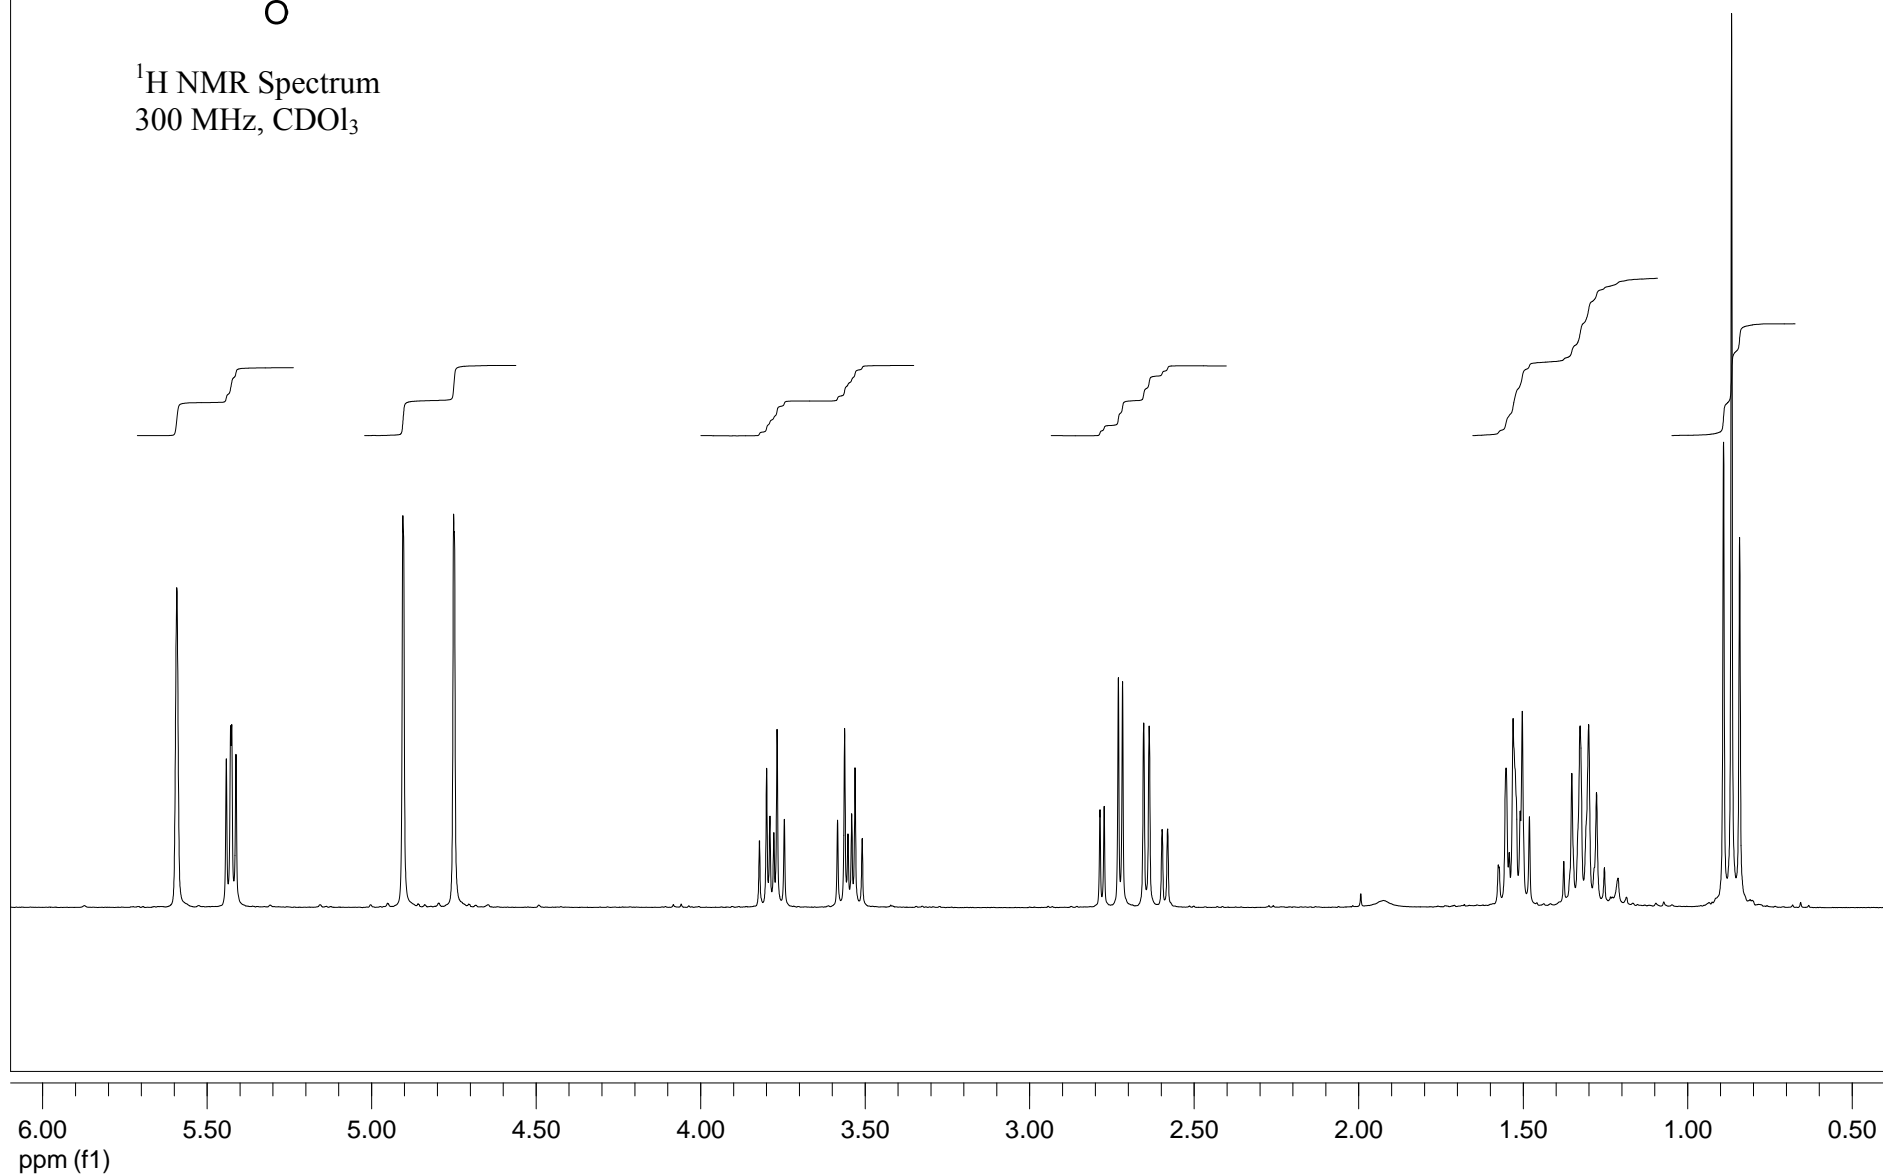

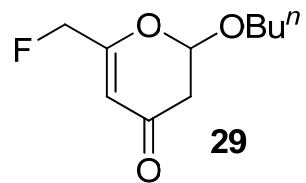

DEPT 135 Spectrum  
75 MHz, CDCl<sub>3</sub>

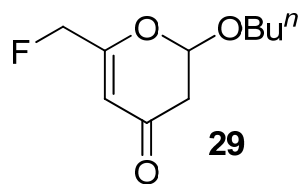

<sup>13</sup>C NMR Spectrum  
75 MHz, CDCl<sub>3</sub>

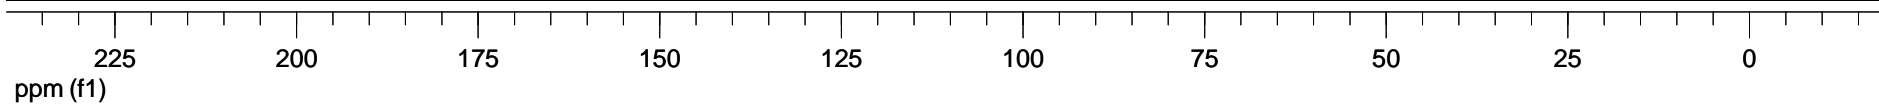

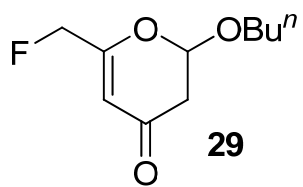

<sup>19</sup>F NMR Spectrum  
282 MHz, CDCl<sub>3</sub>

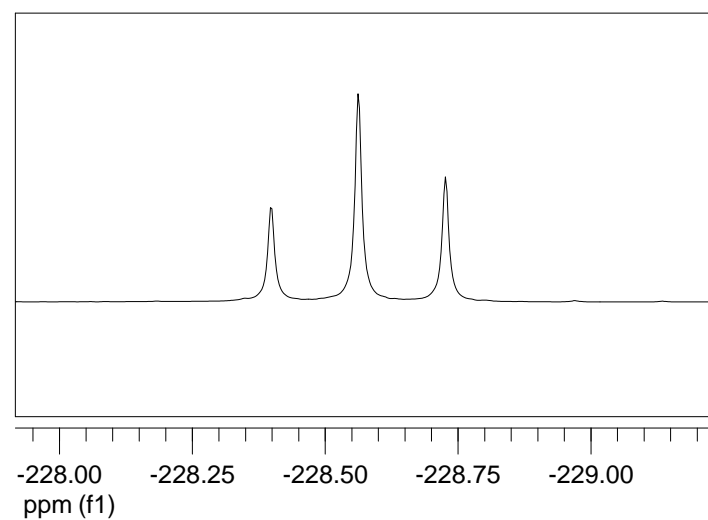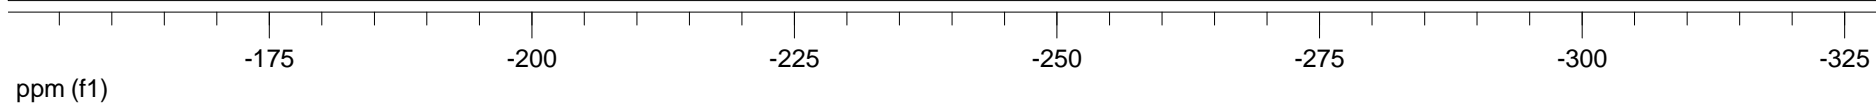

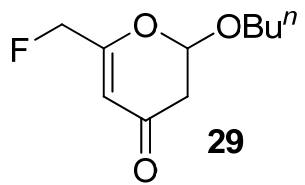

COSY Spectrum, 300 MHz, CDCl<sub>3</sub>

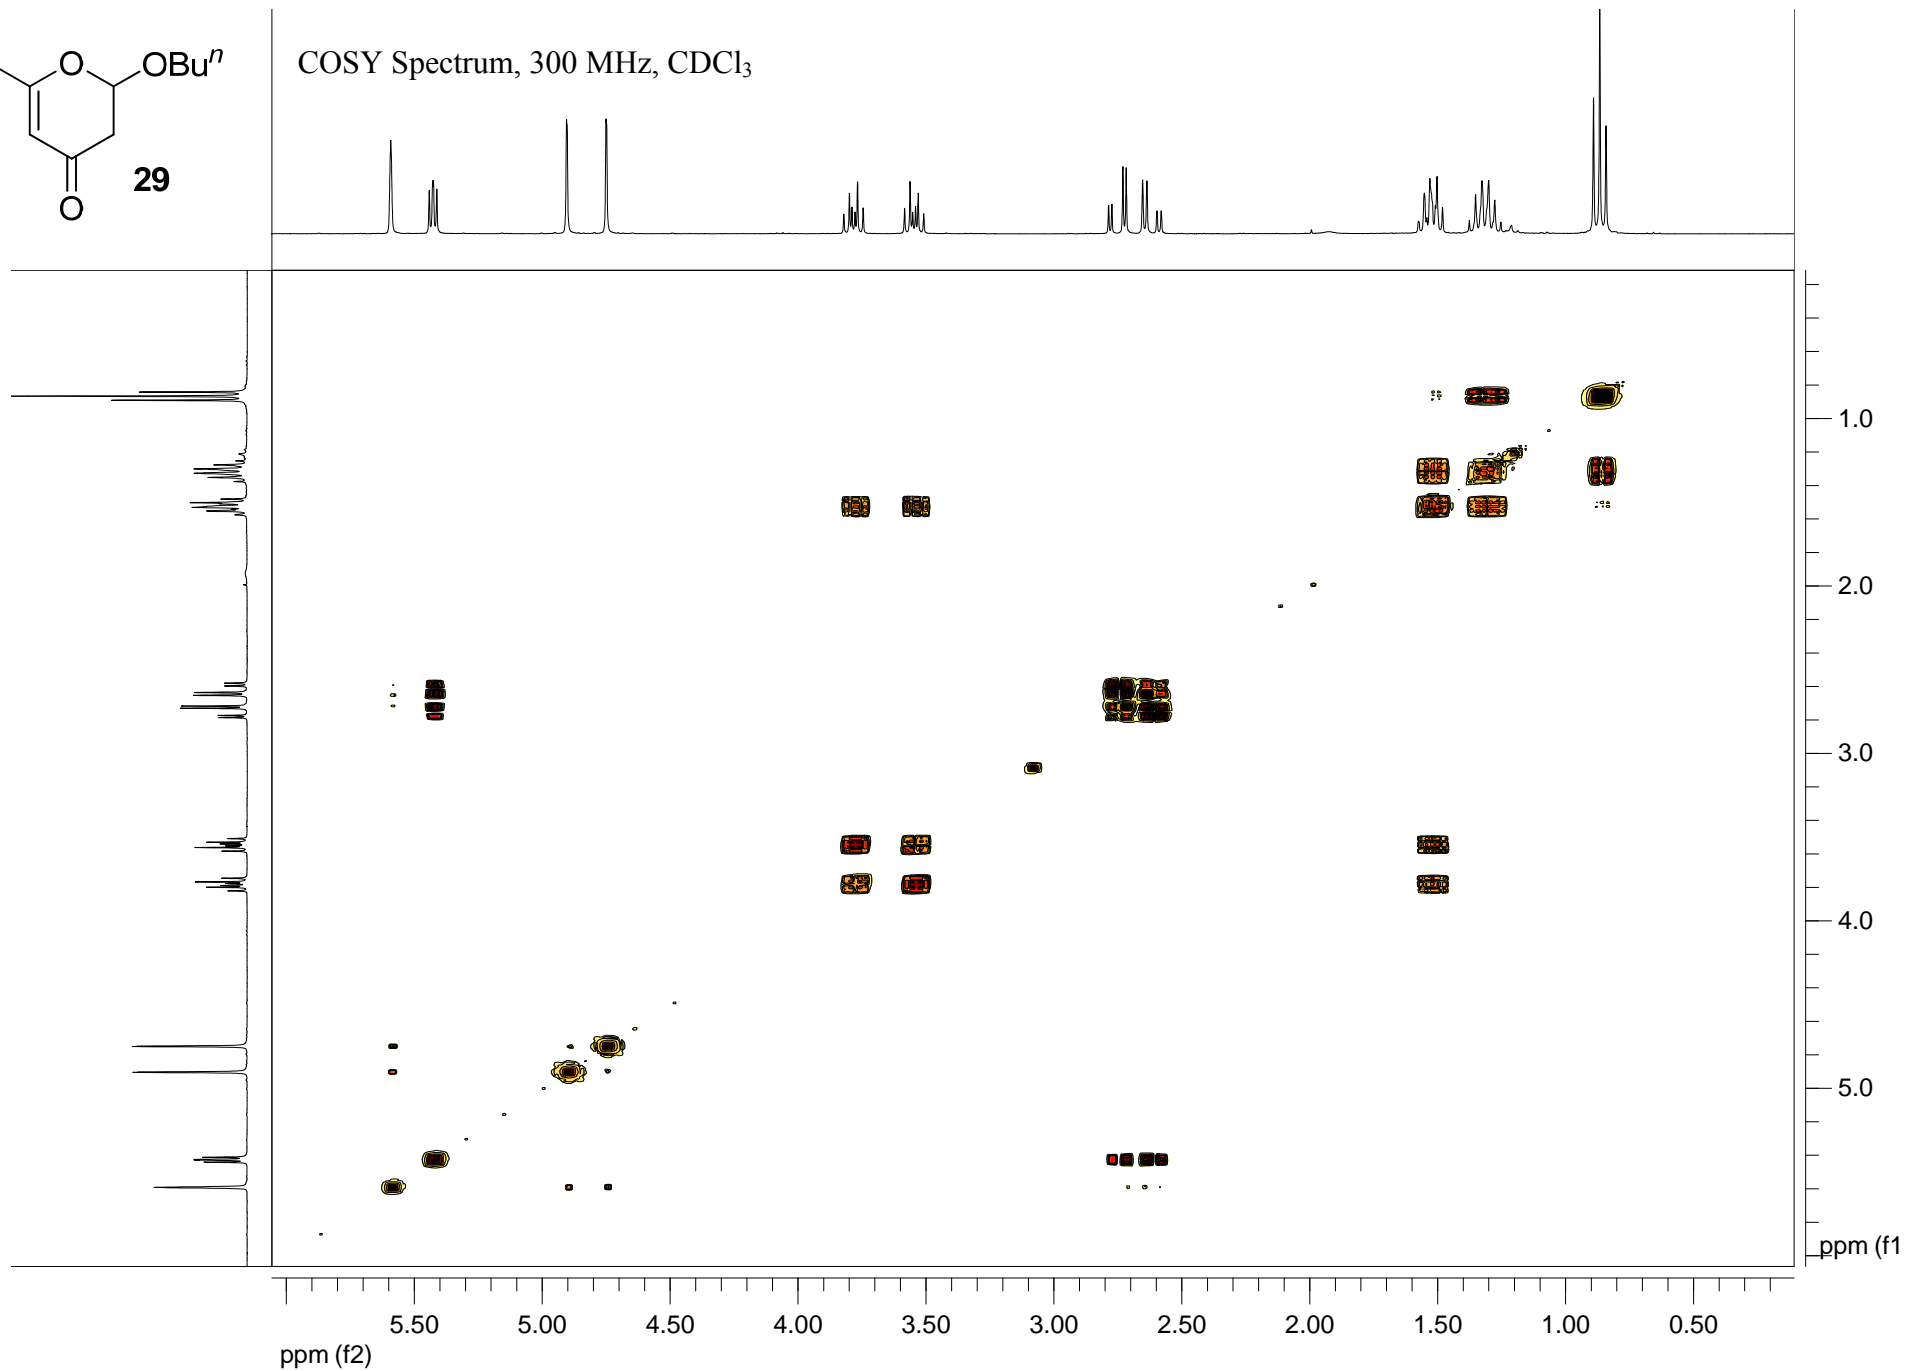

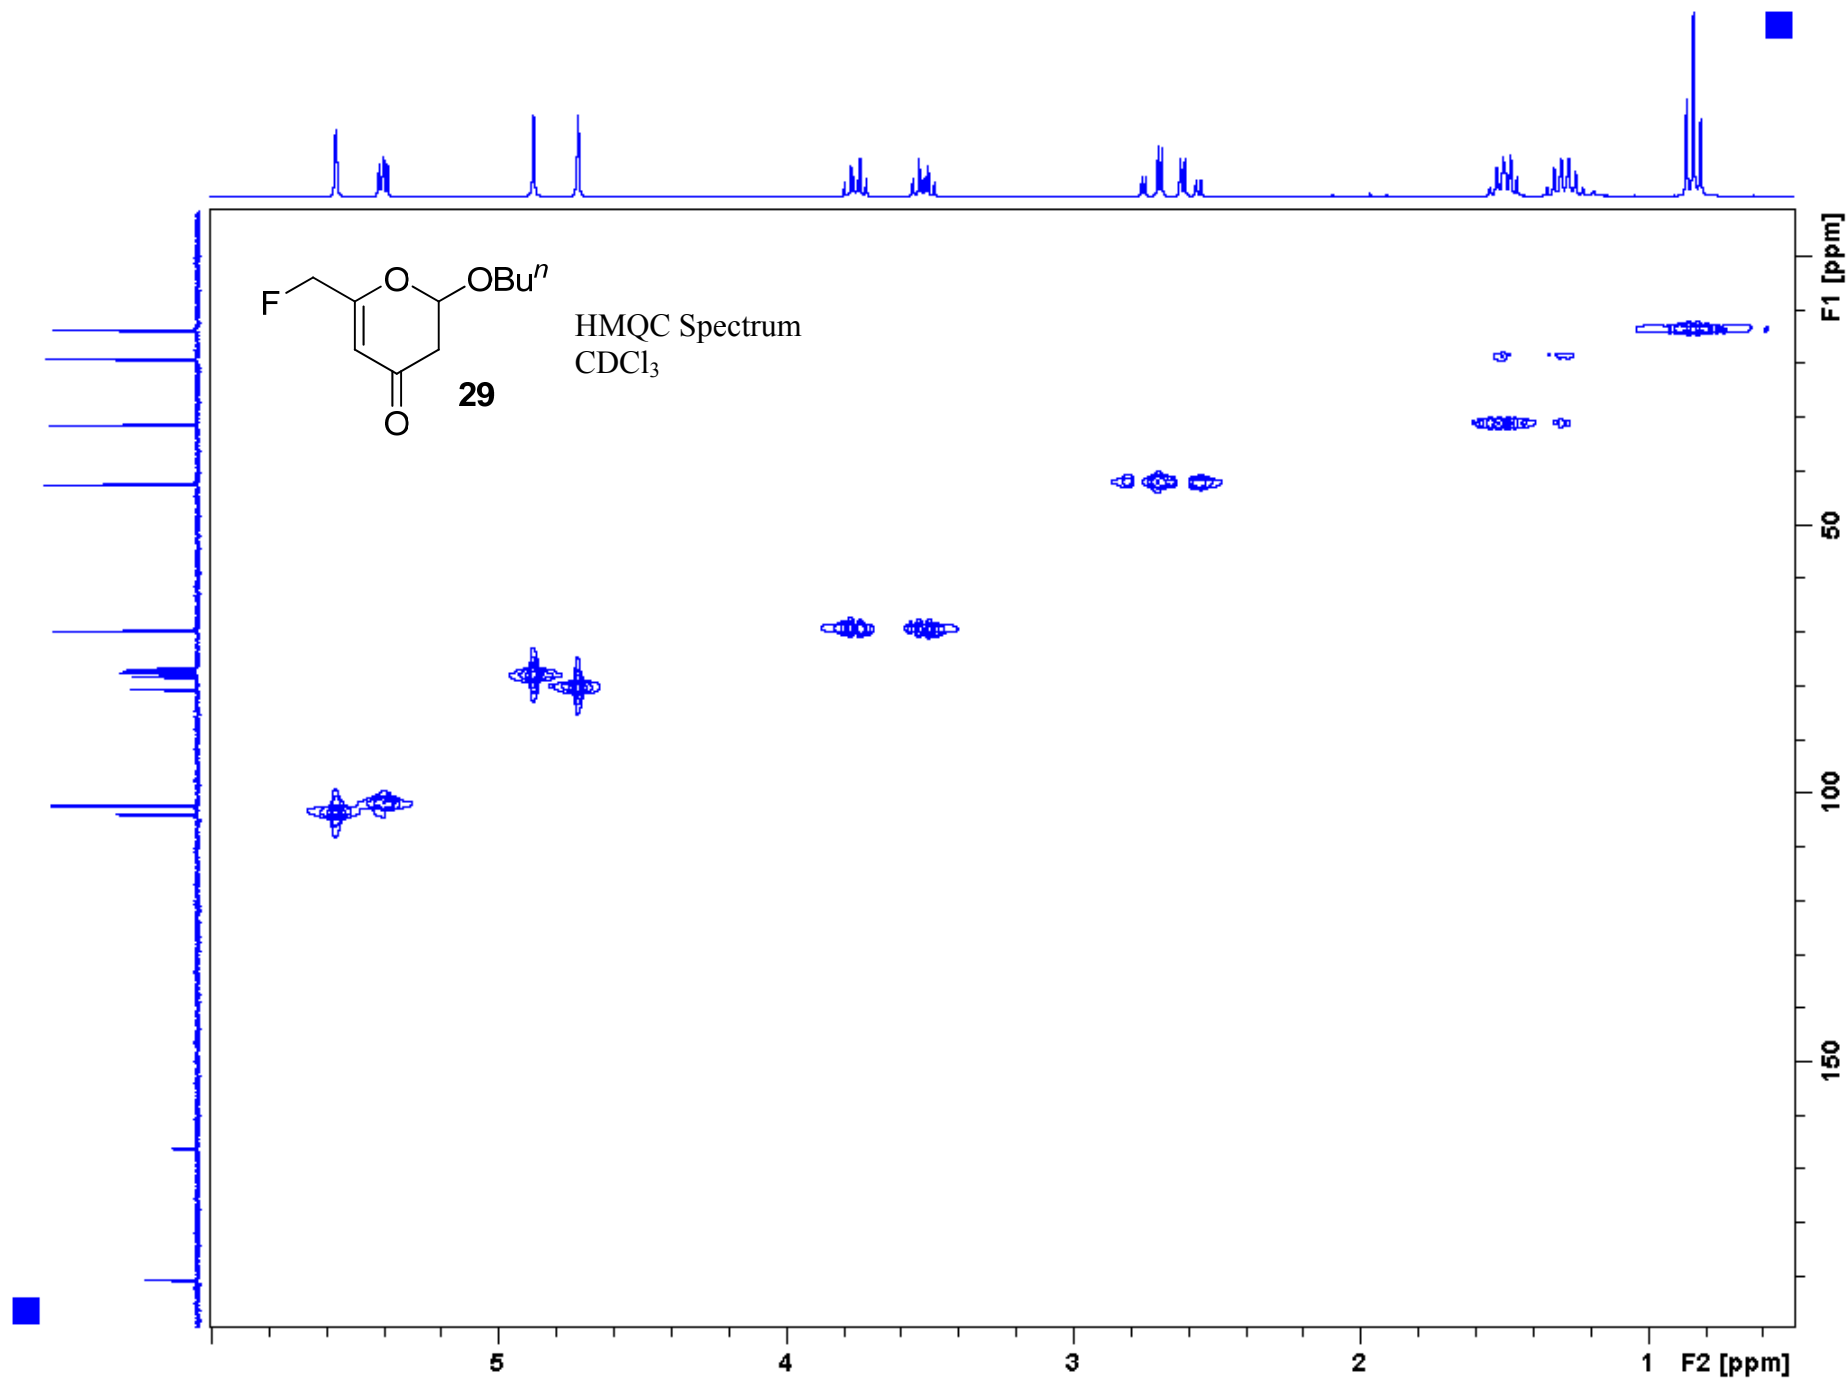



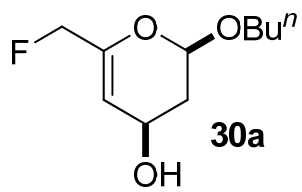

<sup>1</sup>H NMR Spectrum  
300 MHz, CDCl<sub>3</sub>

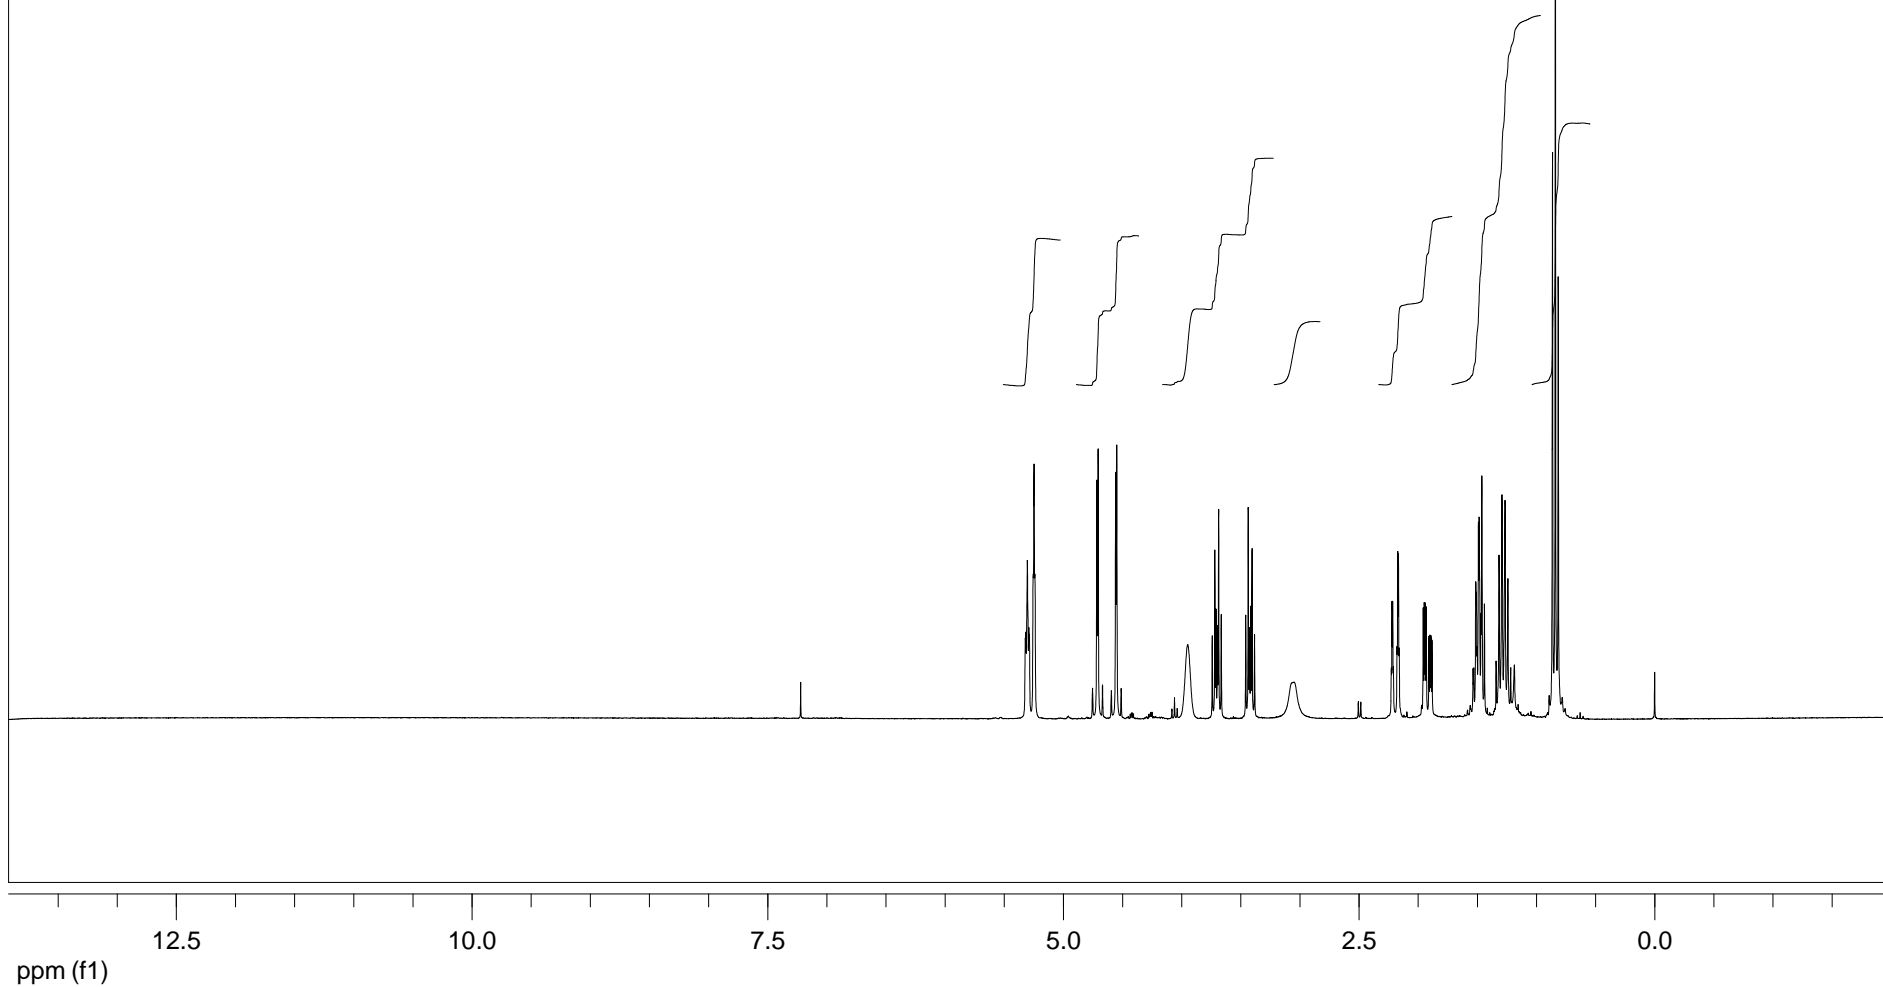

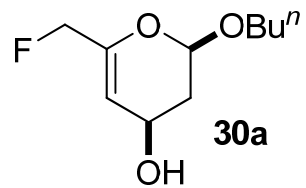

<sup>1</sup>H NMR Spectrum  
300 MHz, CDCl<sub>3</sub>

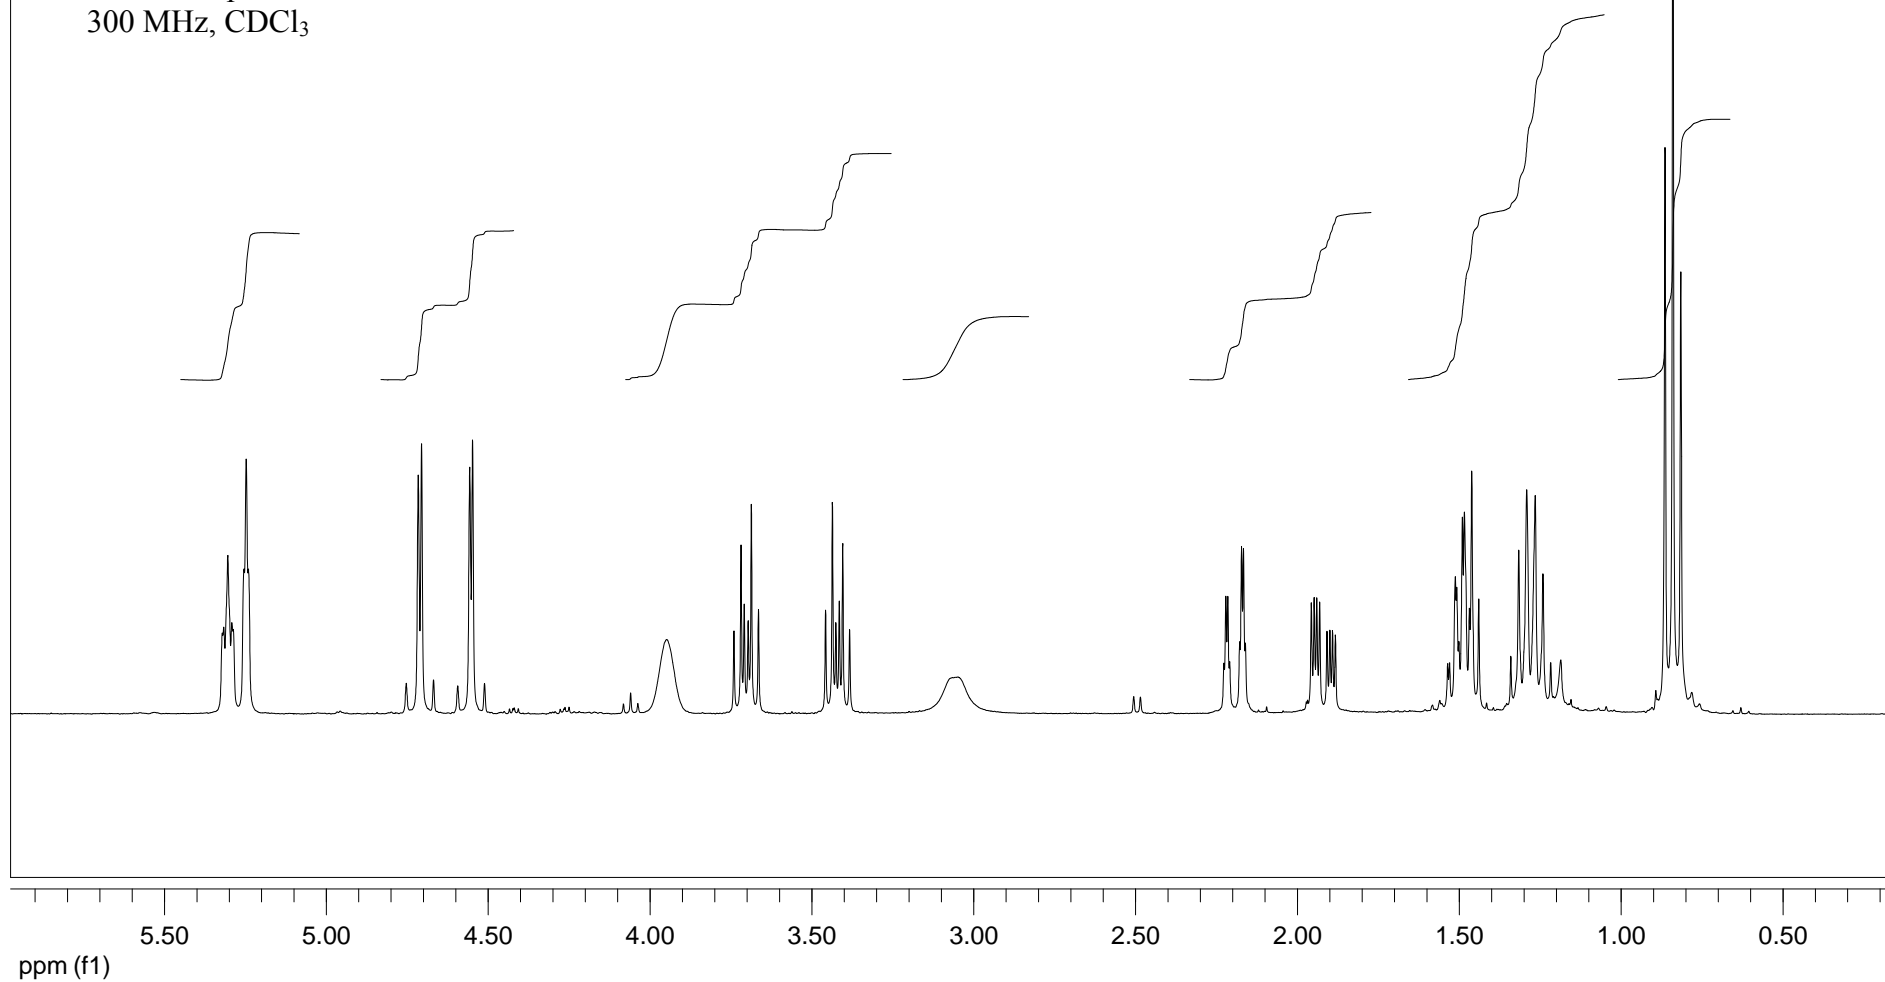

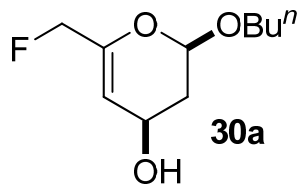

DEPT 135 Spectrum  
75 MHz, CDCl<sub>3</sub>

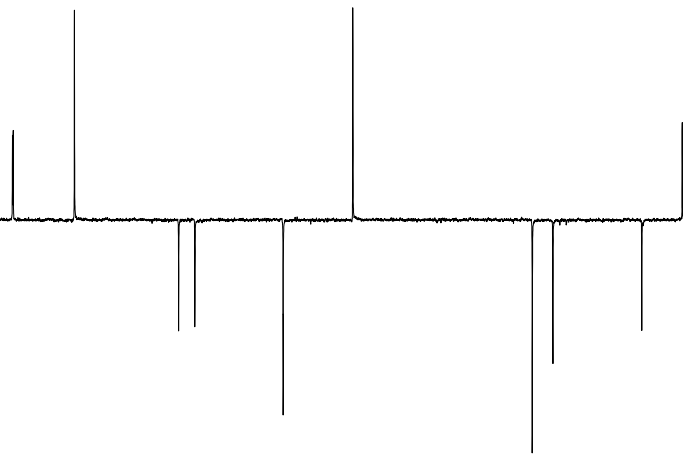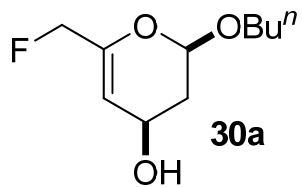

<sup>13</sup>C NMR Spectrum  
75 MHz, CDCl<sub>3</sub>

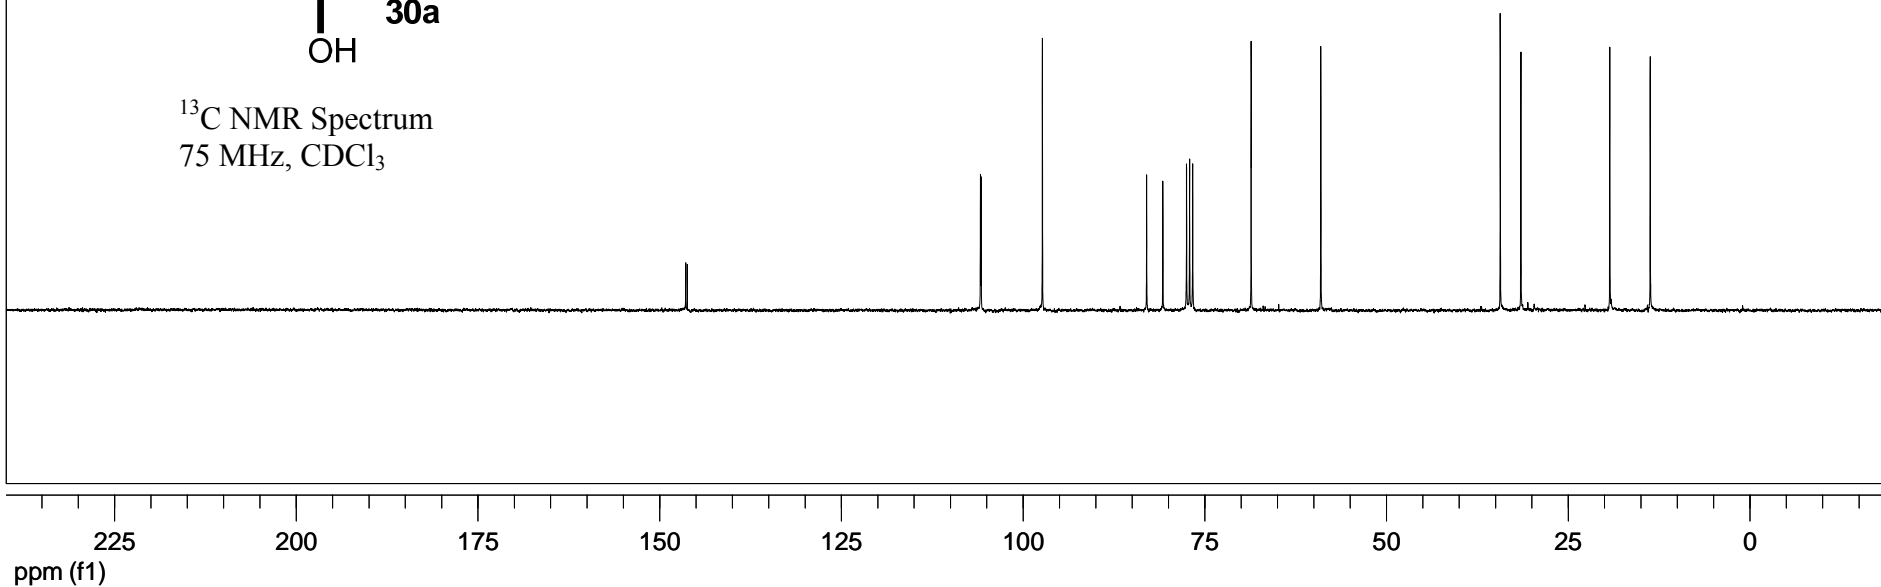

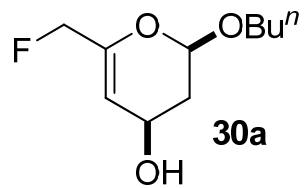

$^{19}\text{F}$  NMR Spectrum  
282 MHz,  $\text{CDCl}_3$

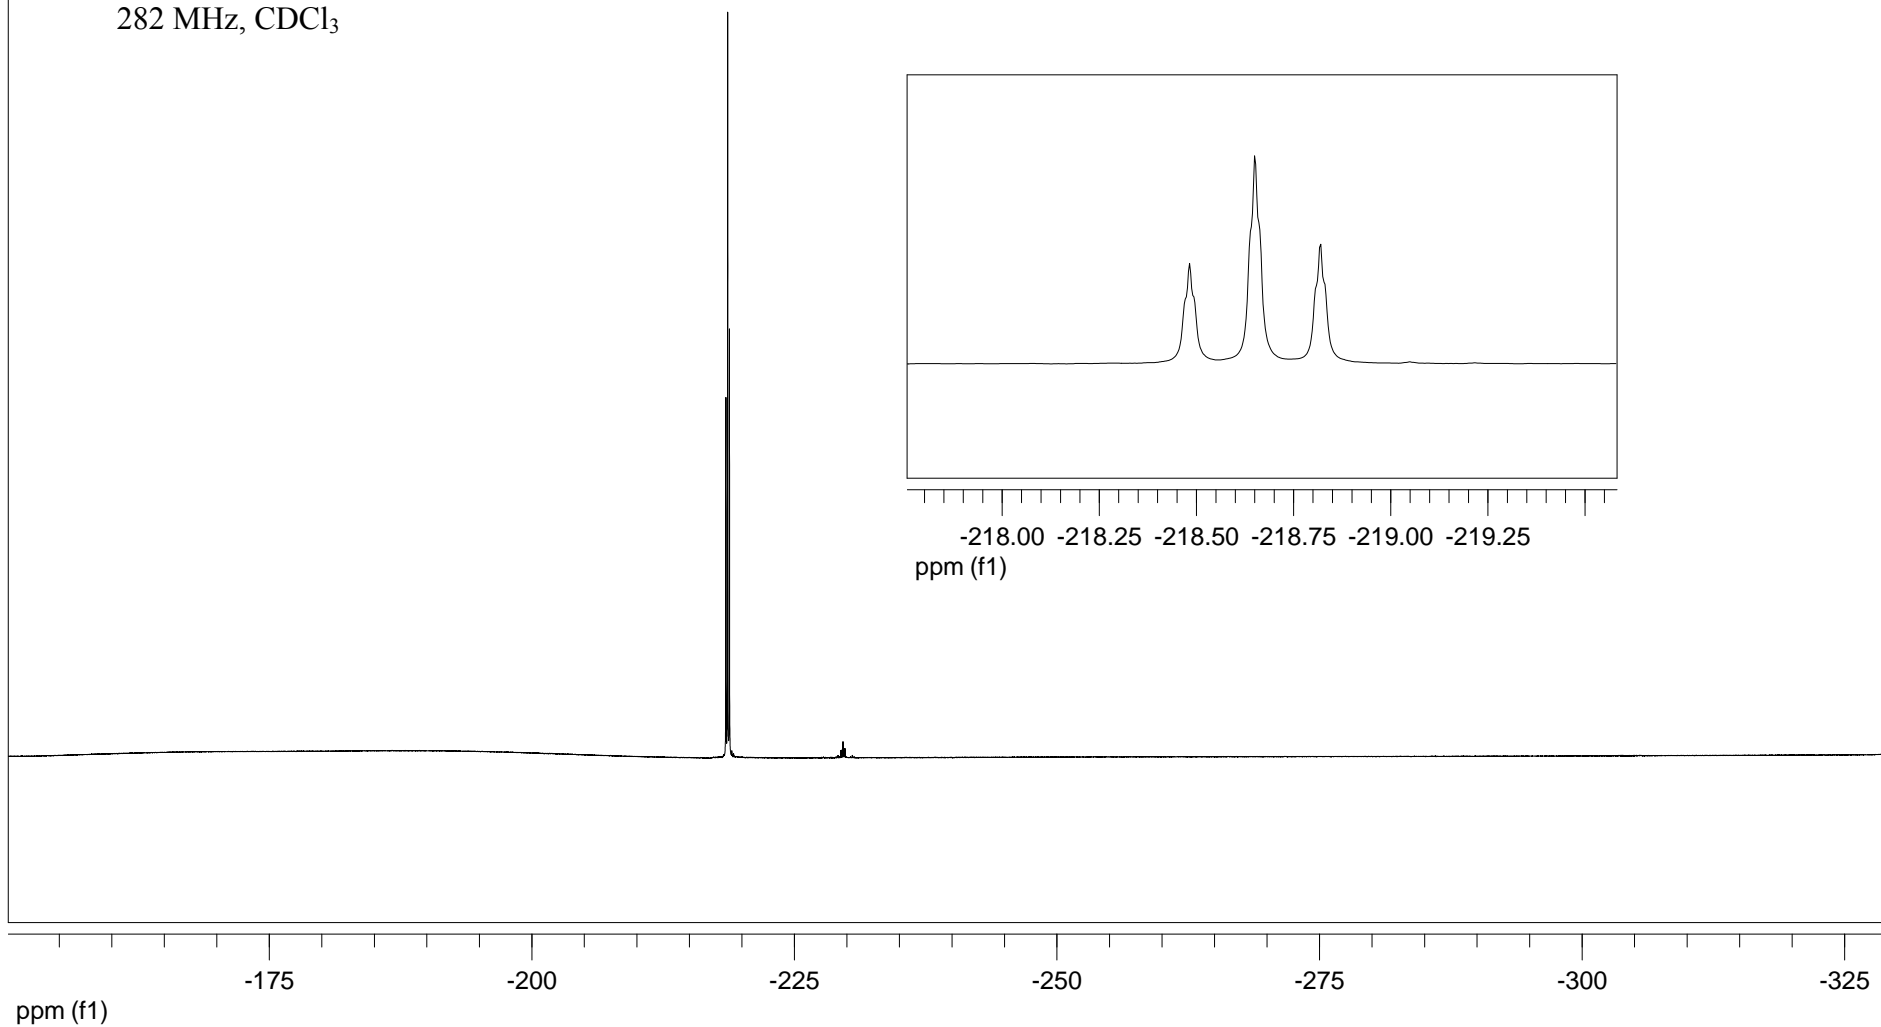

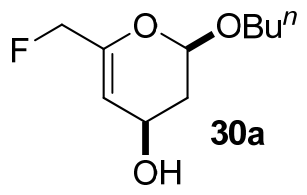

COSY Spectrum, 300 MHz, CDCl<sub>3</sub>

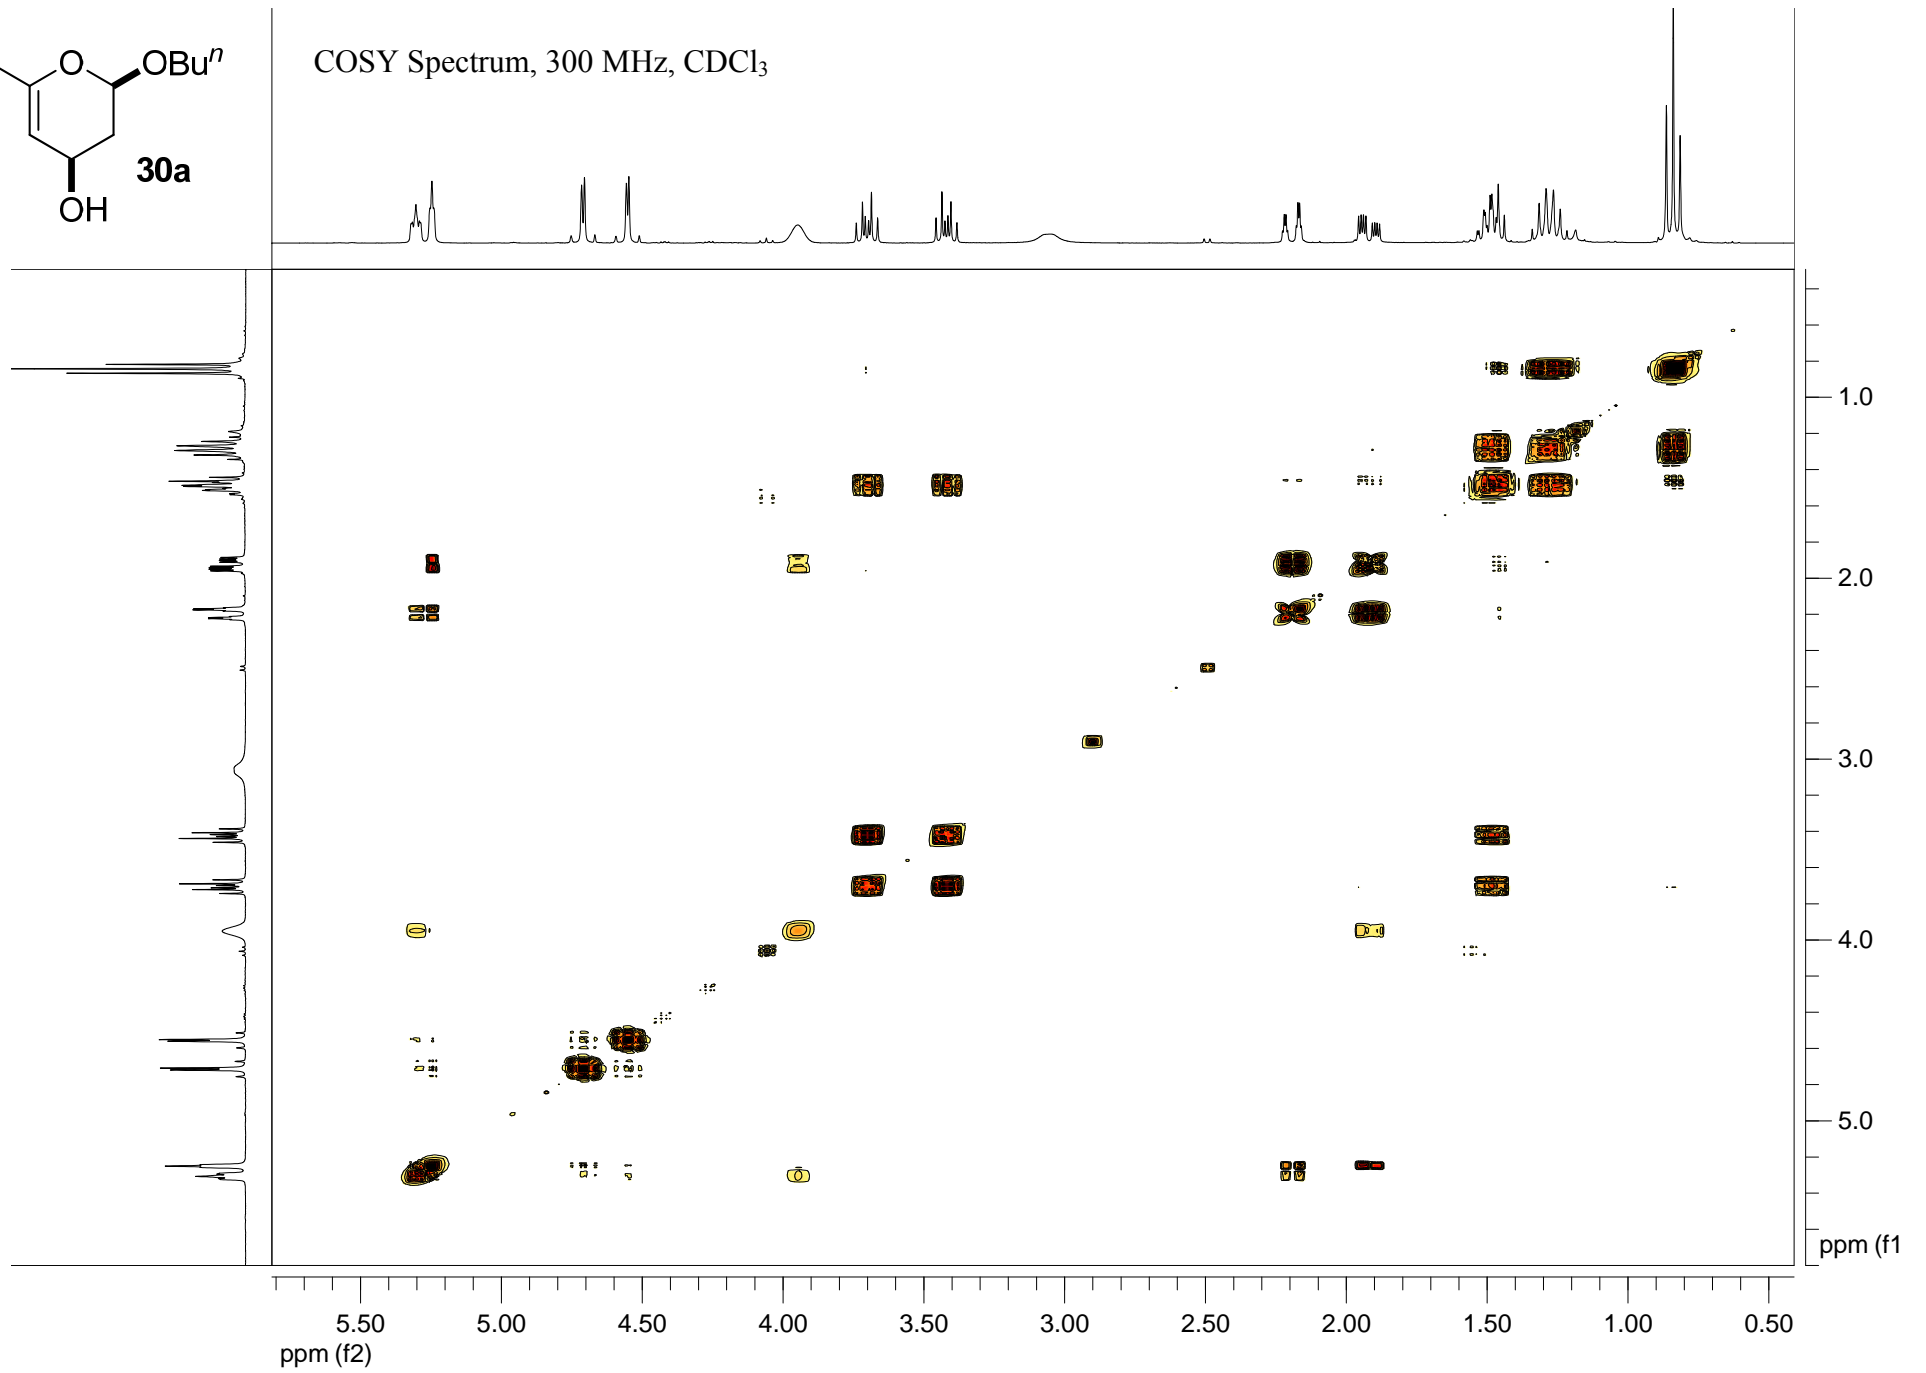

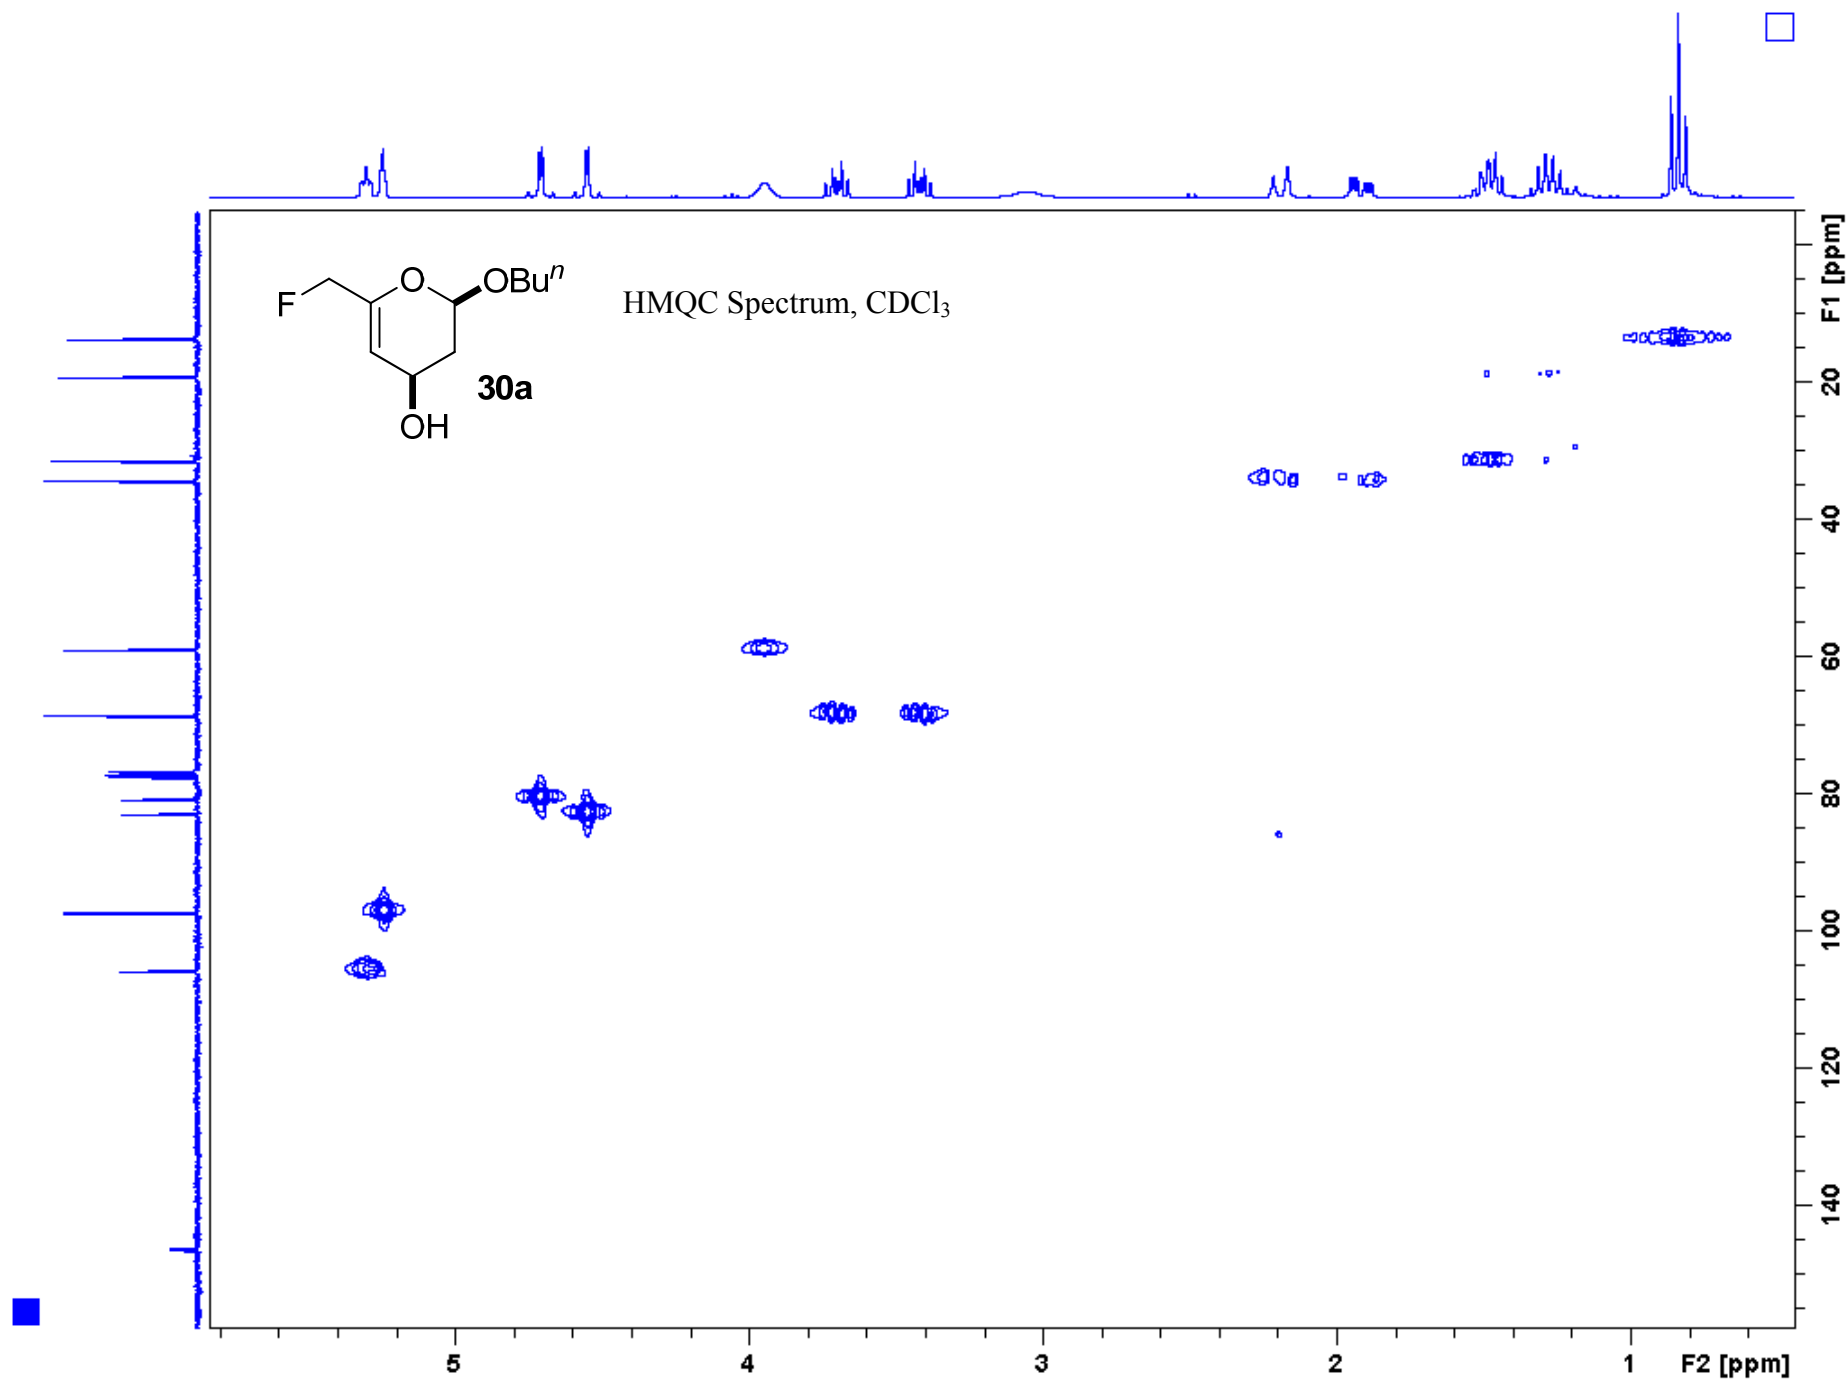

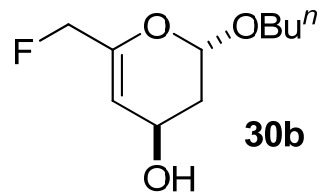

$^1\text{H}$  NMR Spectrum  
300 MHz,  $\text{CDCl}_3$

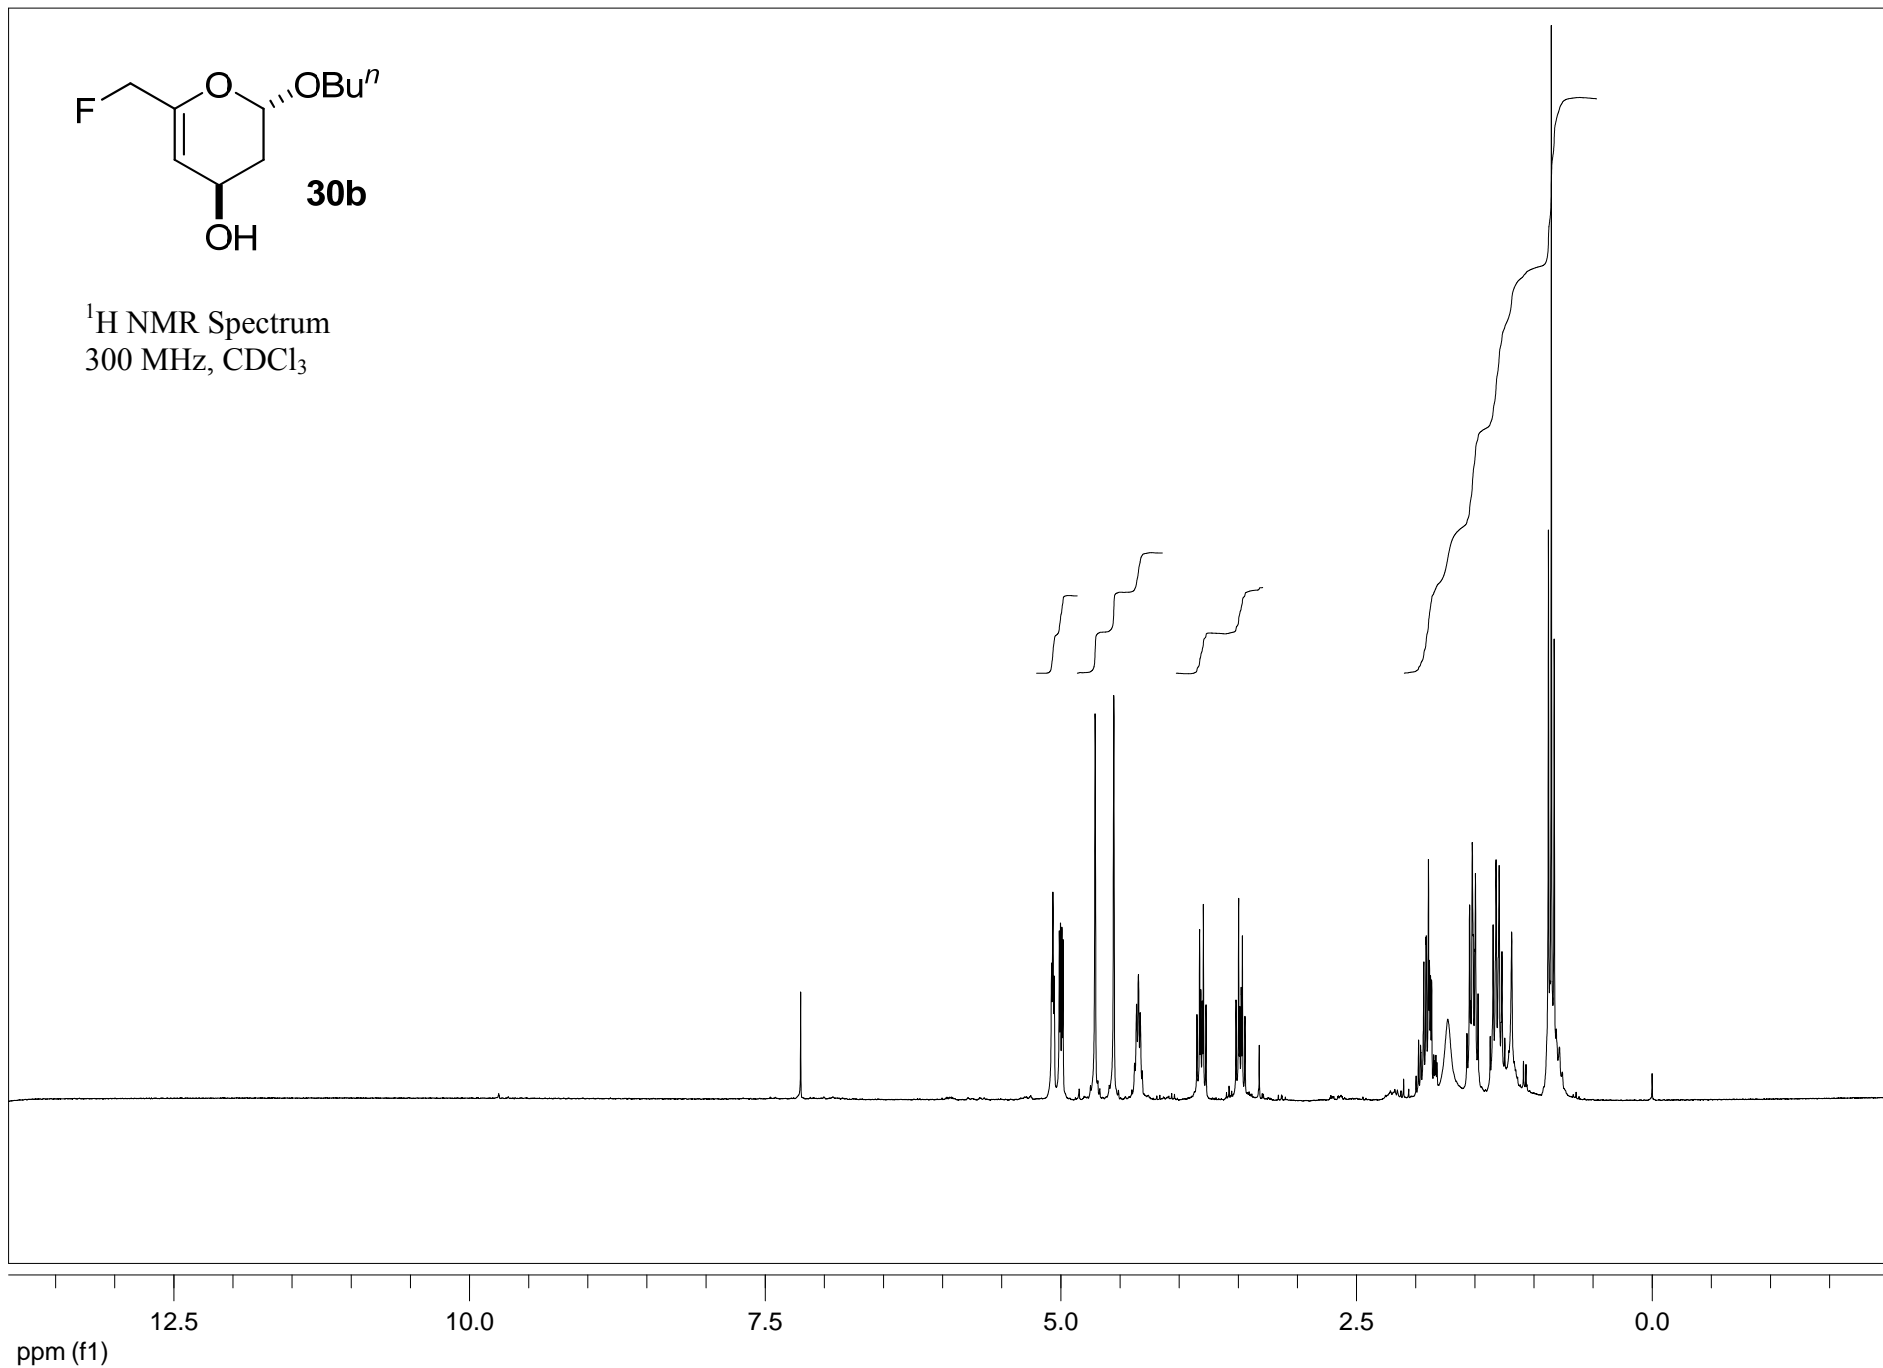

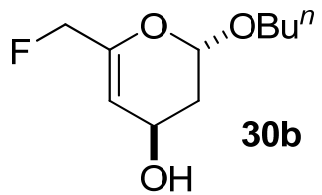

$^1\text{H}$  NMR Spectrum  
300 MHz,  $\text{CDCl}_3$

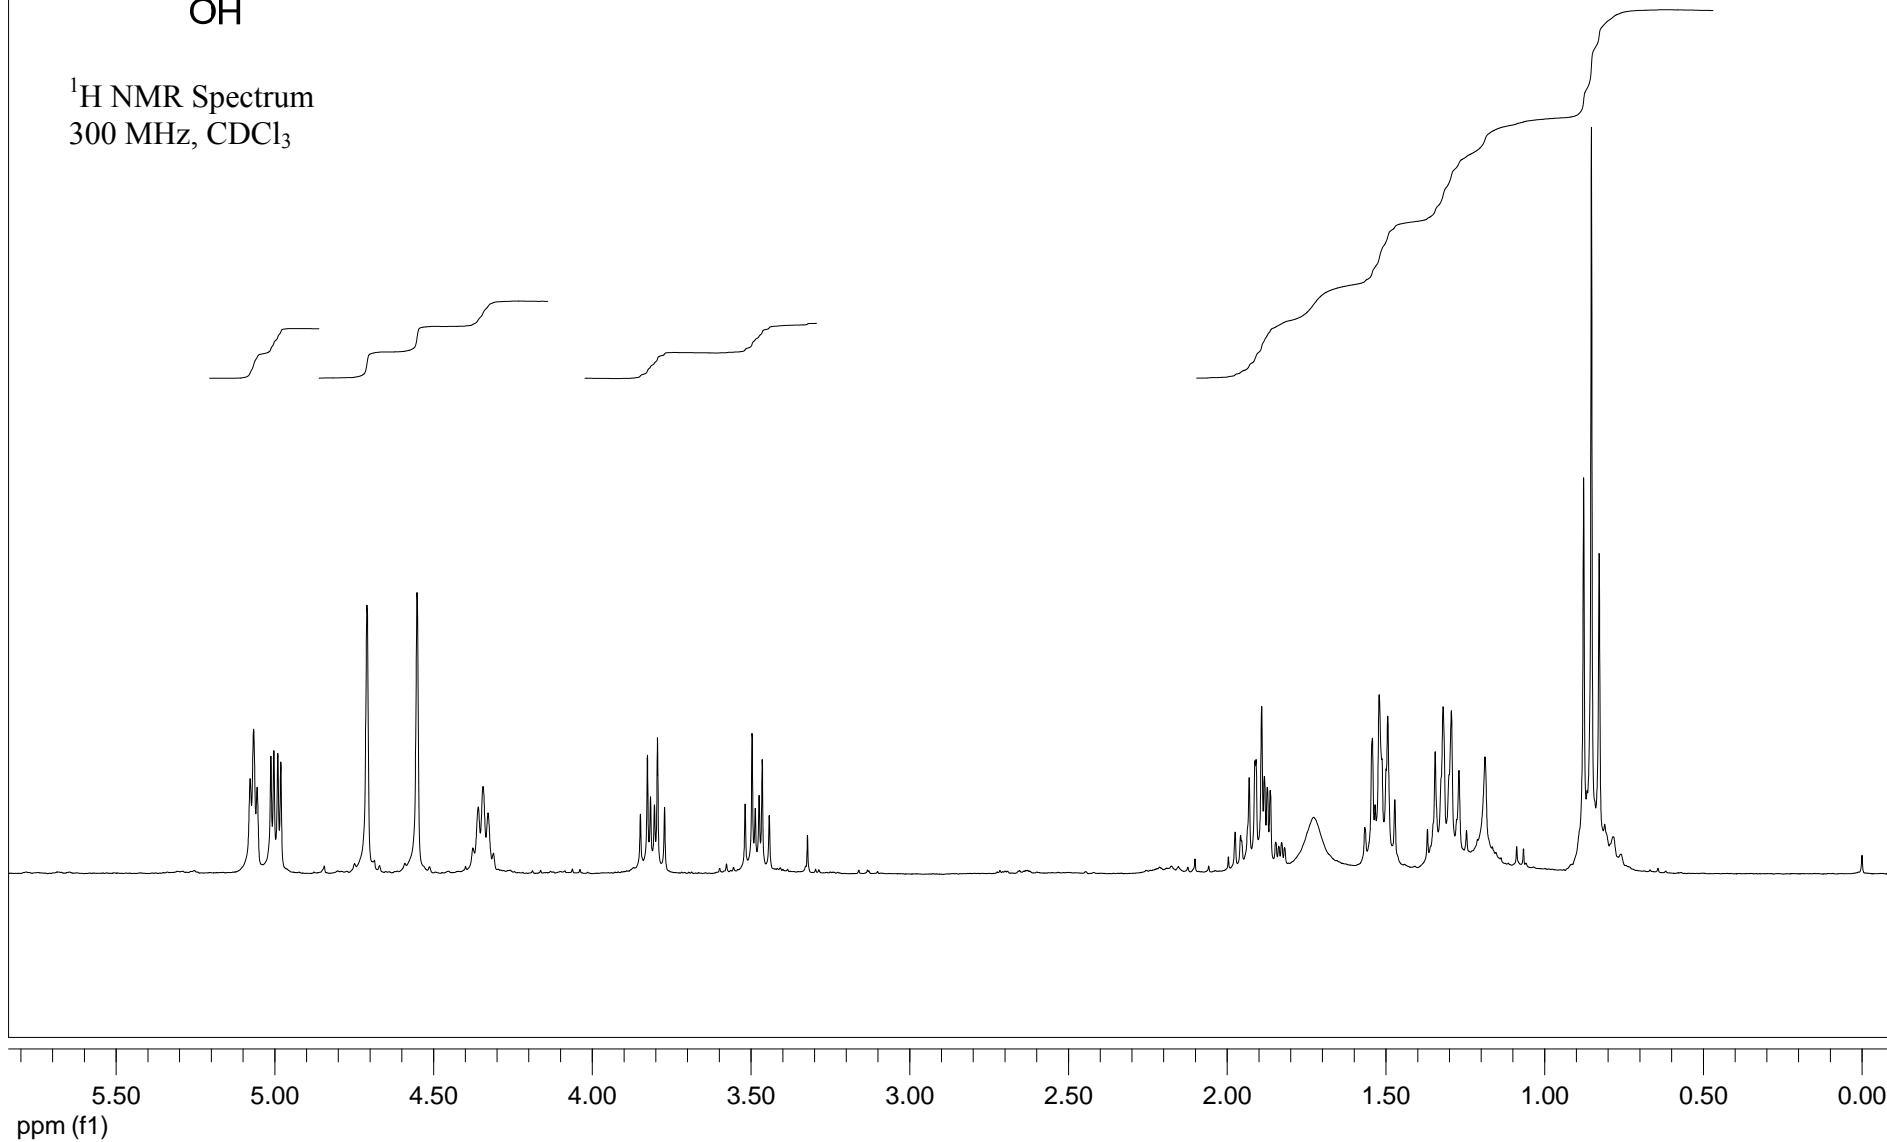



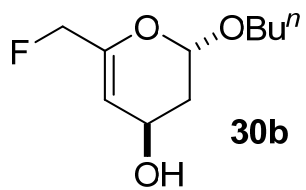

DEPT 135 Spectrum  
75 MHz, CDCl<sub>3</sub>

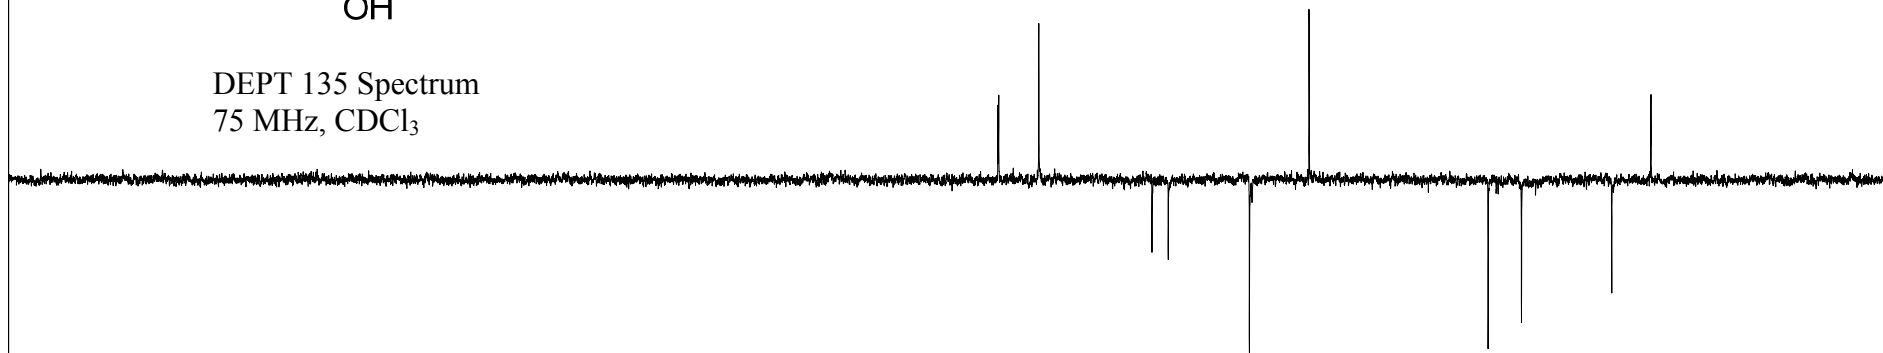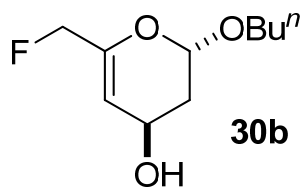

<sup>13</sup>C NMR Spectrum  
75 MHz, CDCl<sub>3</sub>

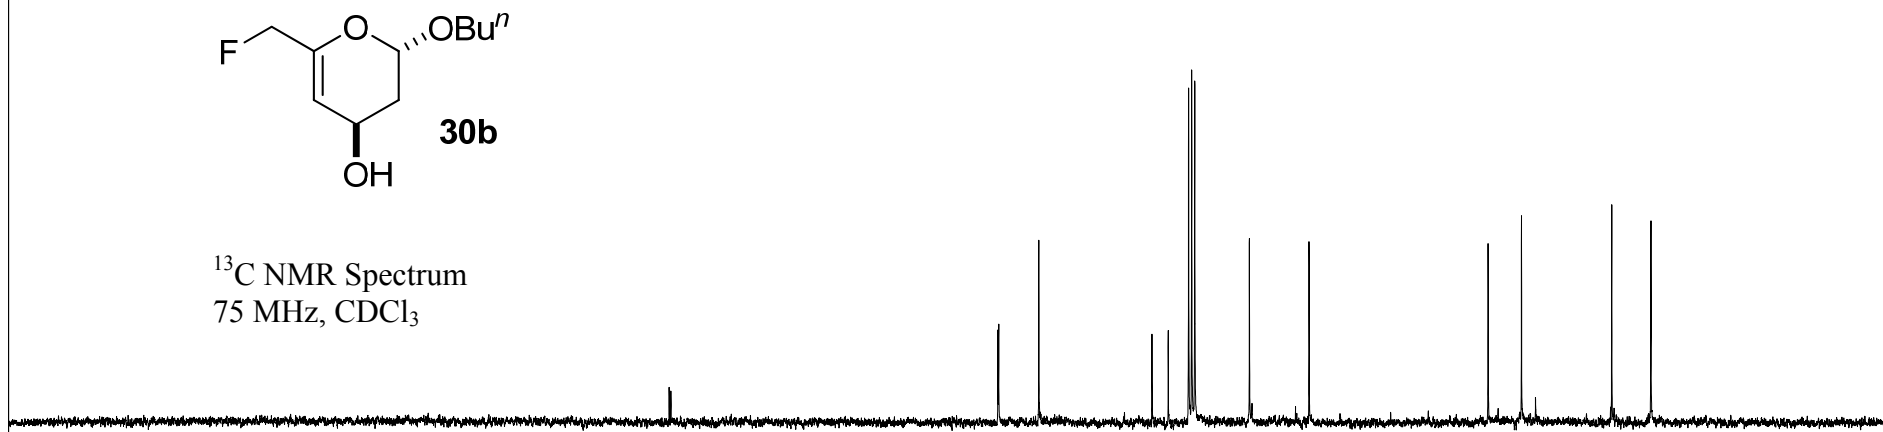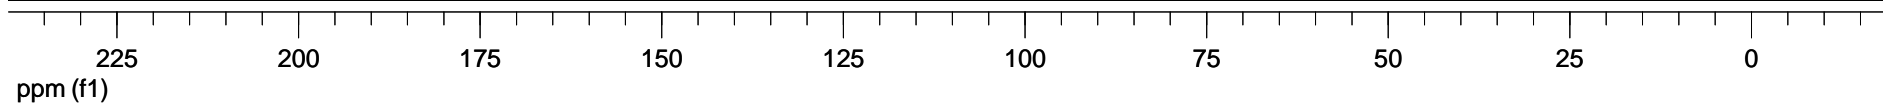

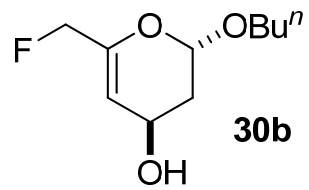

$^{19}\text{F}$  NMR Spectrum  
282 MHz,  $\text{CDCl}_3$

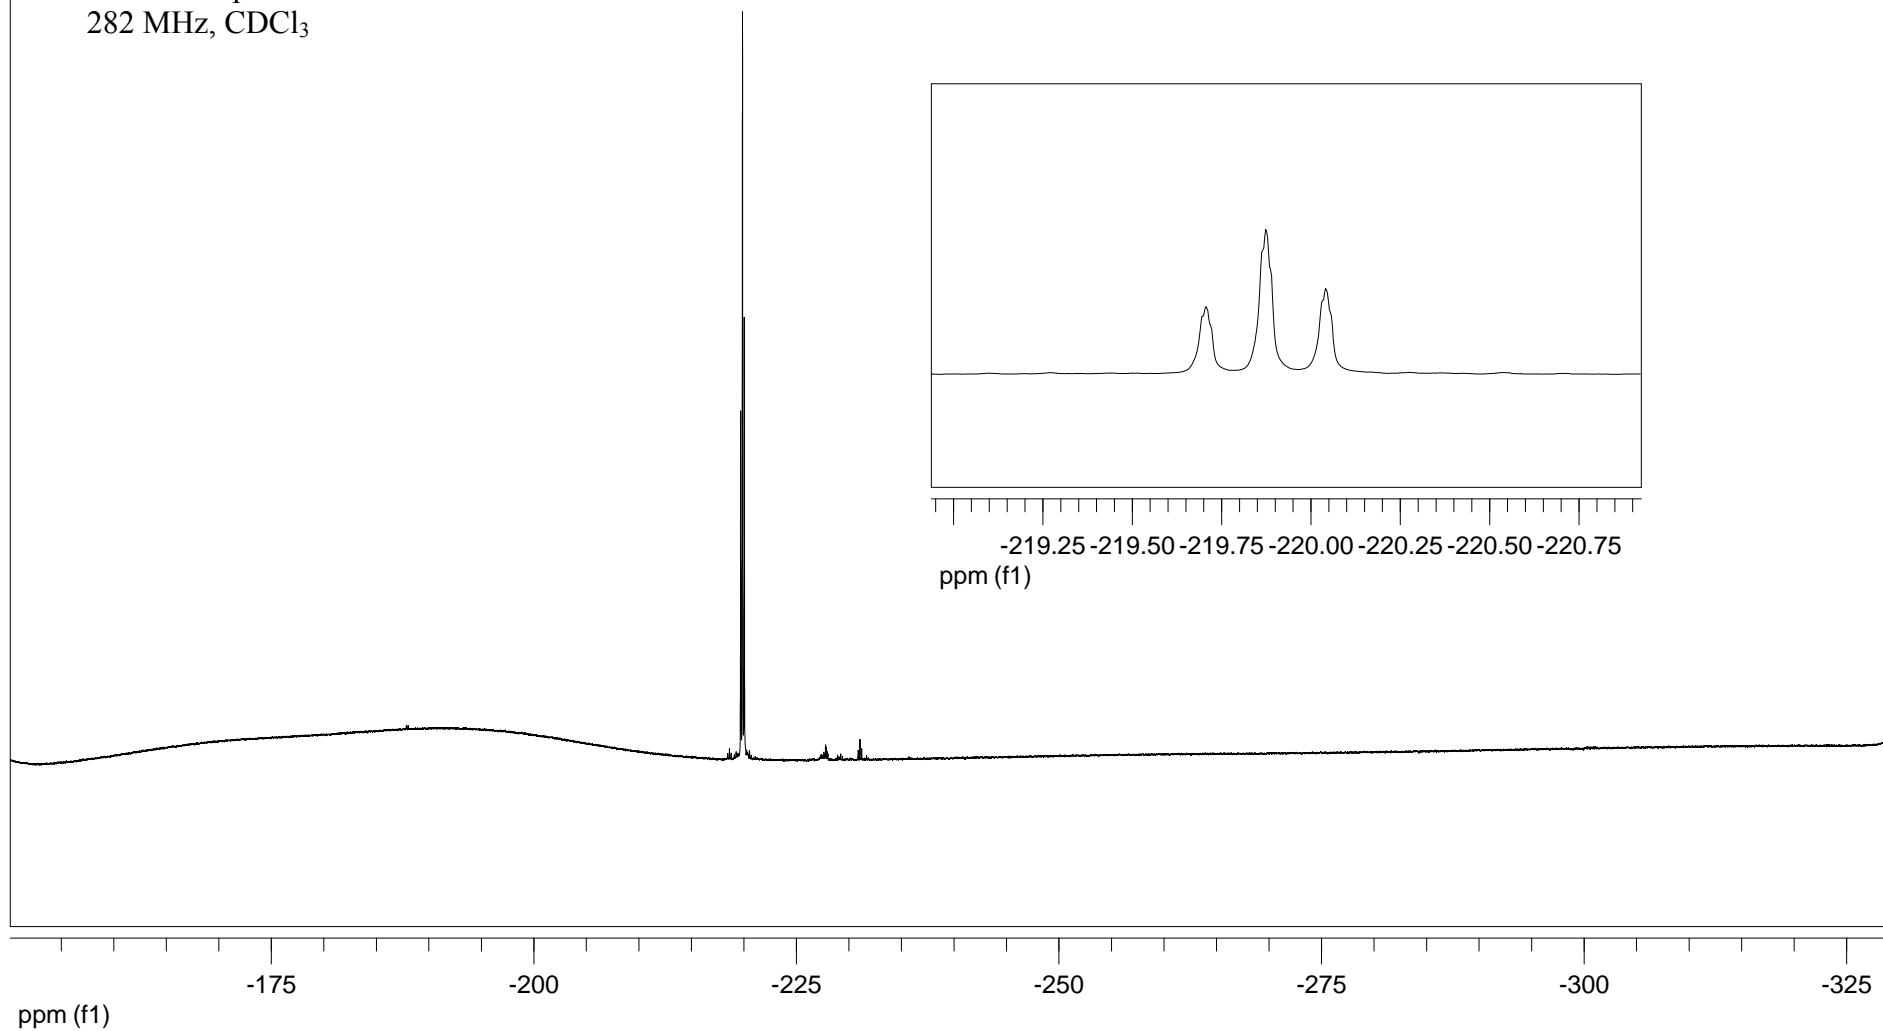

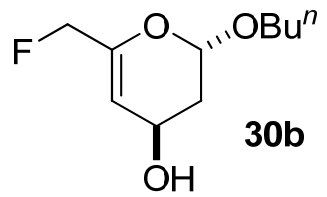

COSY Spectrum, 300 MHz, CDCl<sub>3</sub>

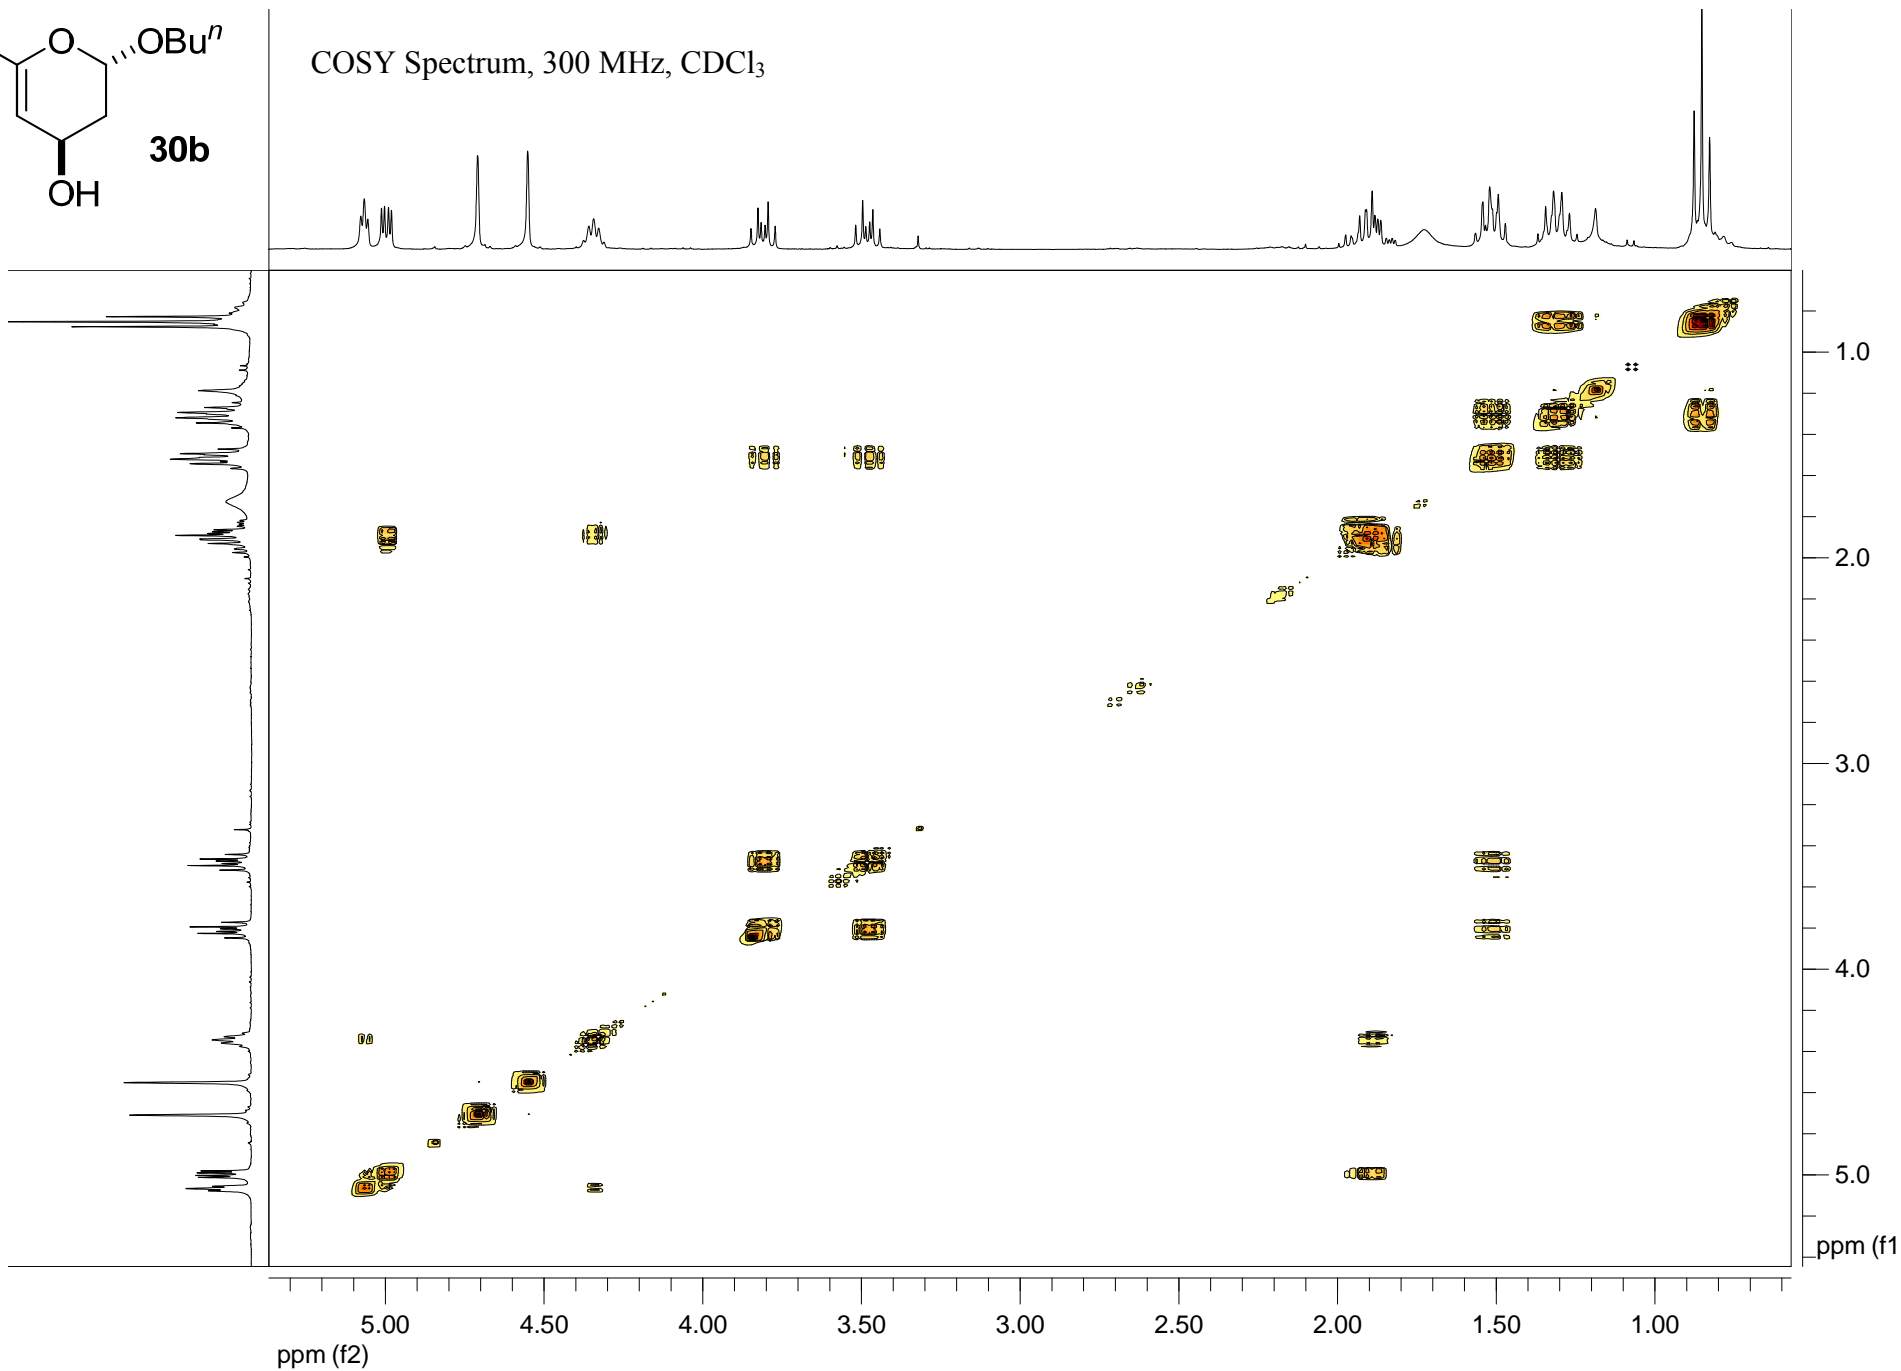

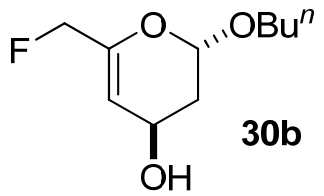

HMQC Spectrum  
CDCl<sub>3</sub>

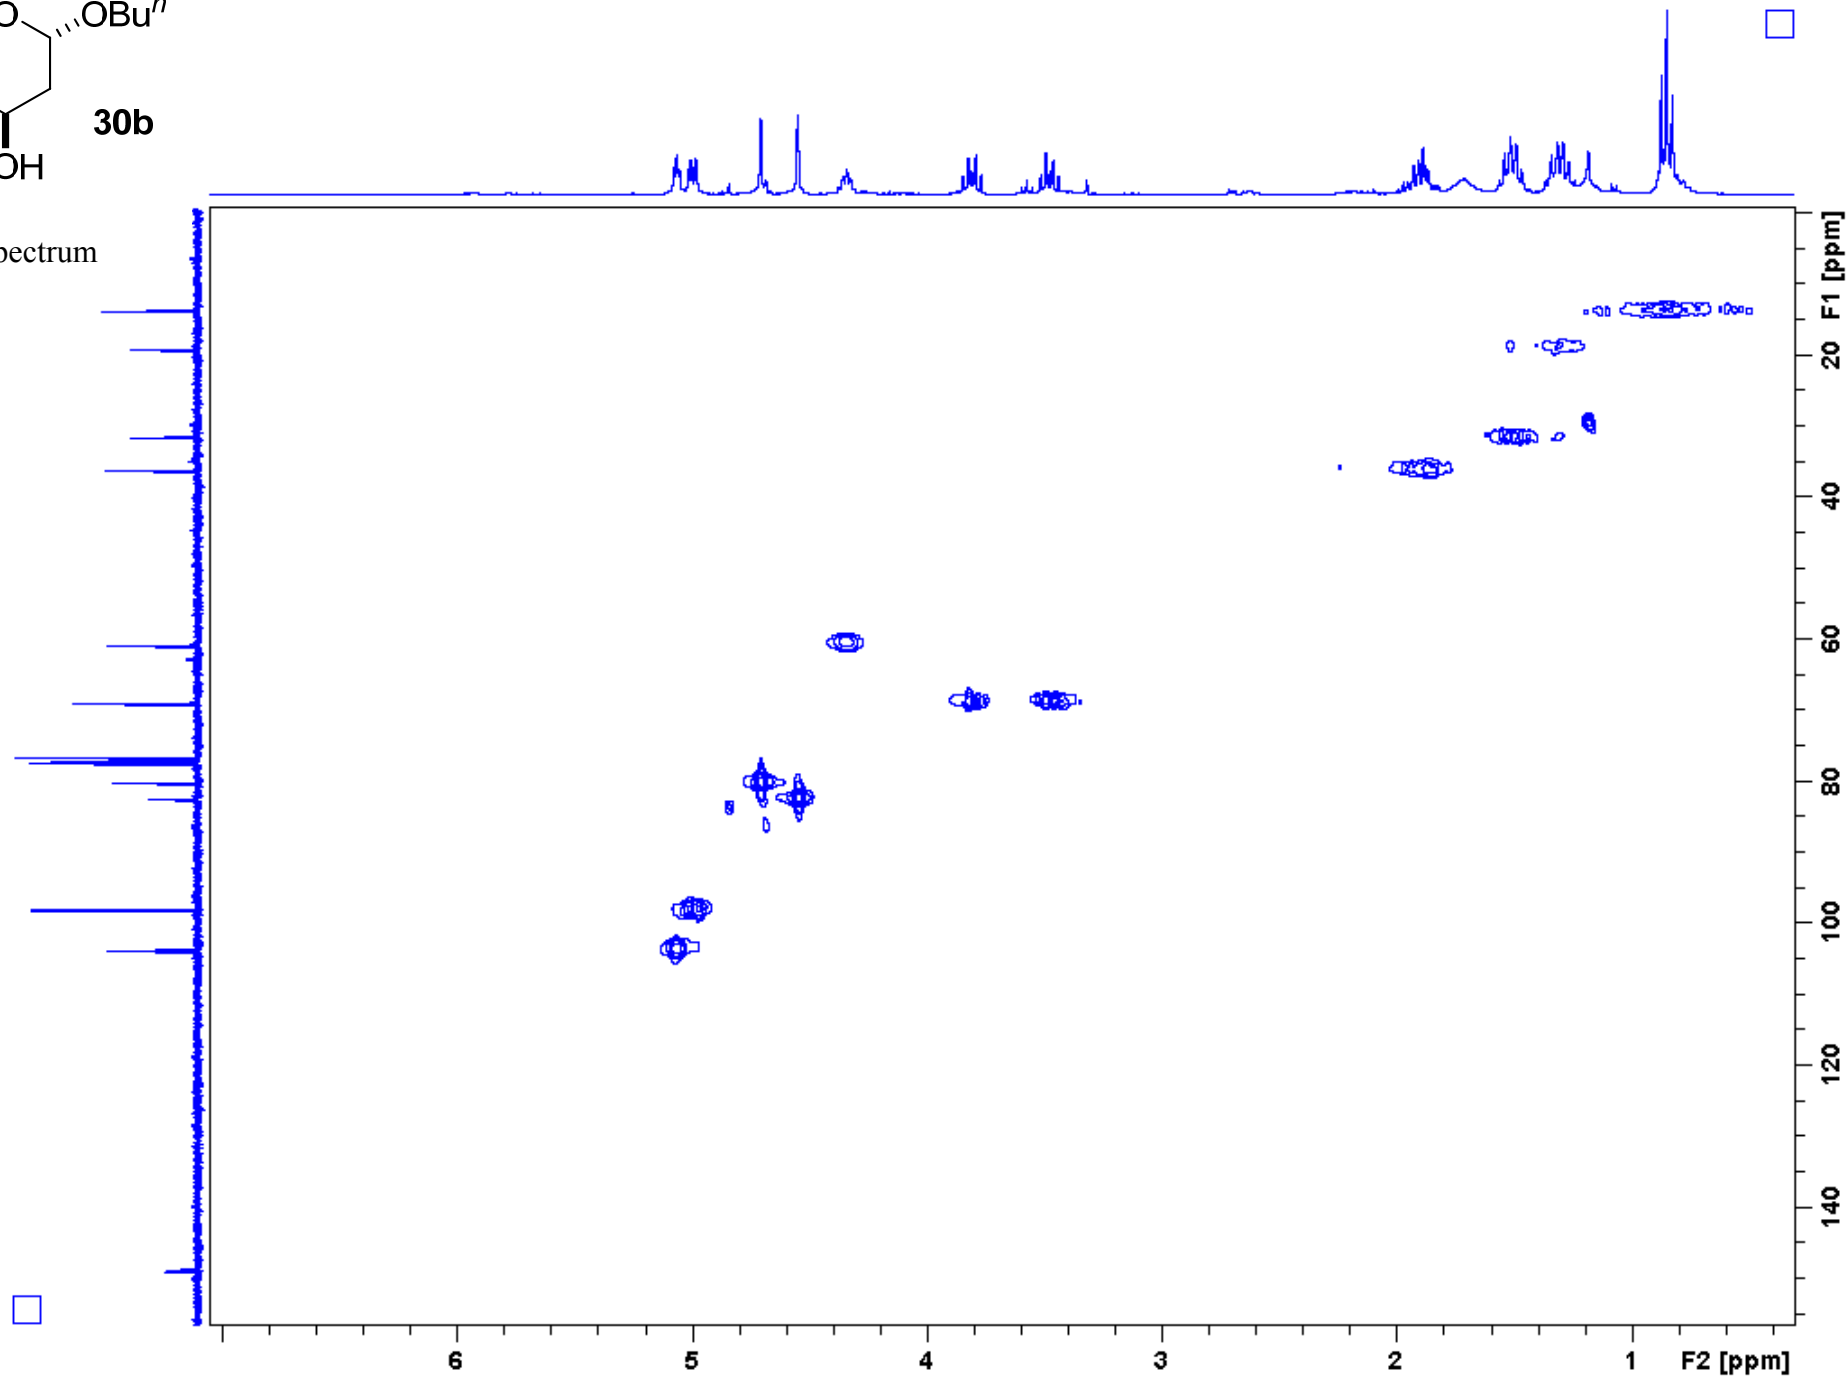

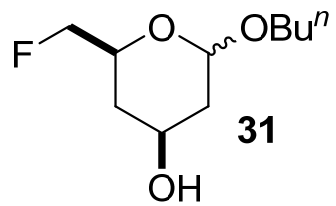

<sup>1</sup>H NMR Spectrum  
300 MHz, CDCl<sub>3</sub>

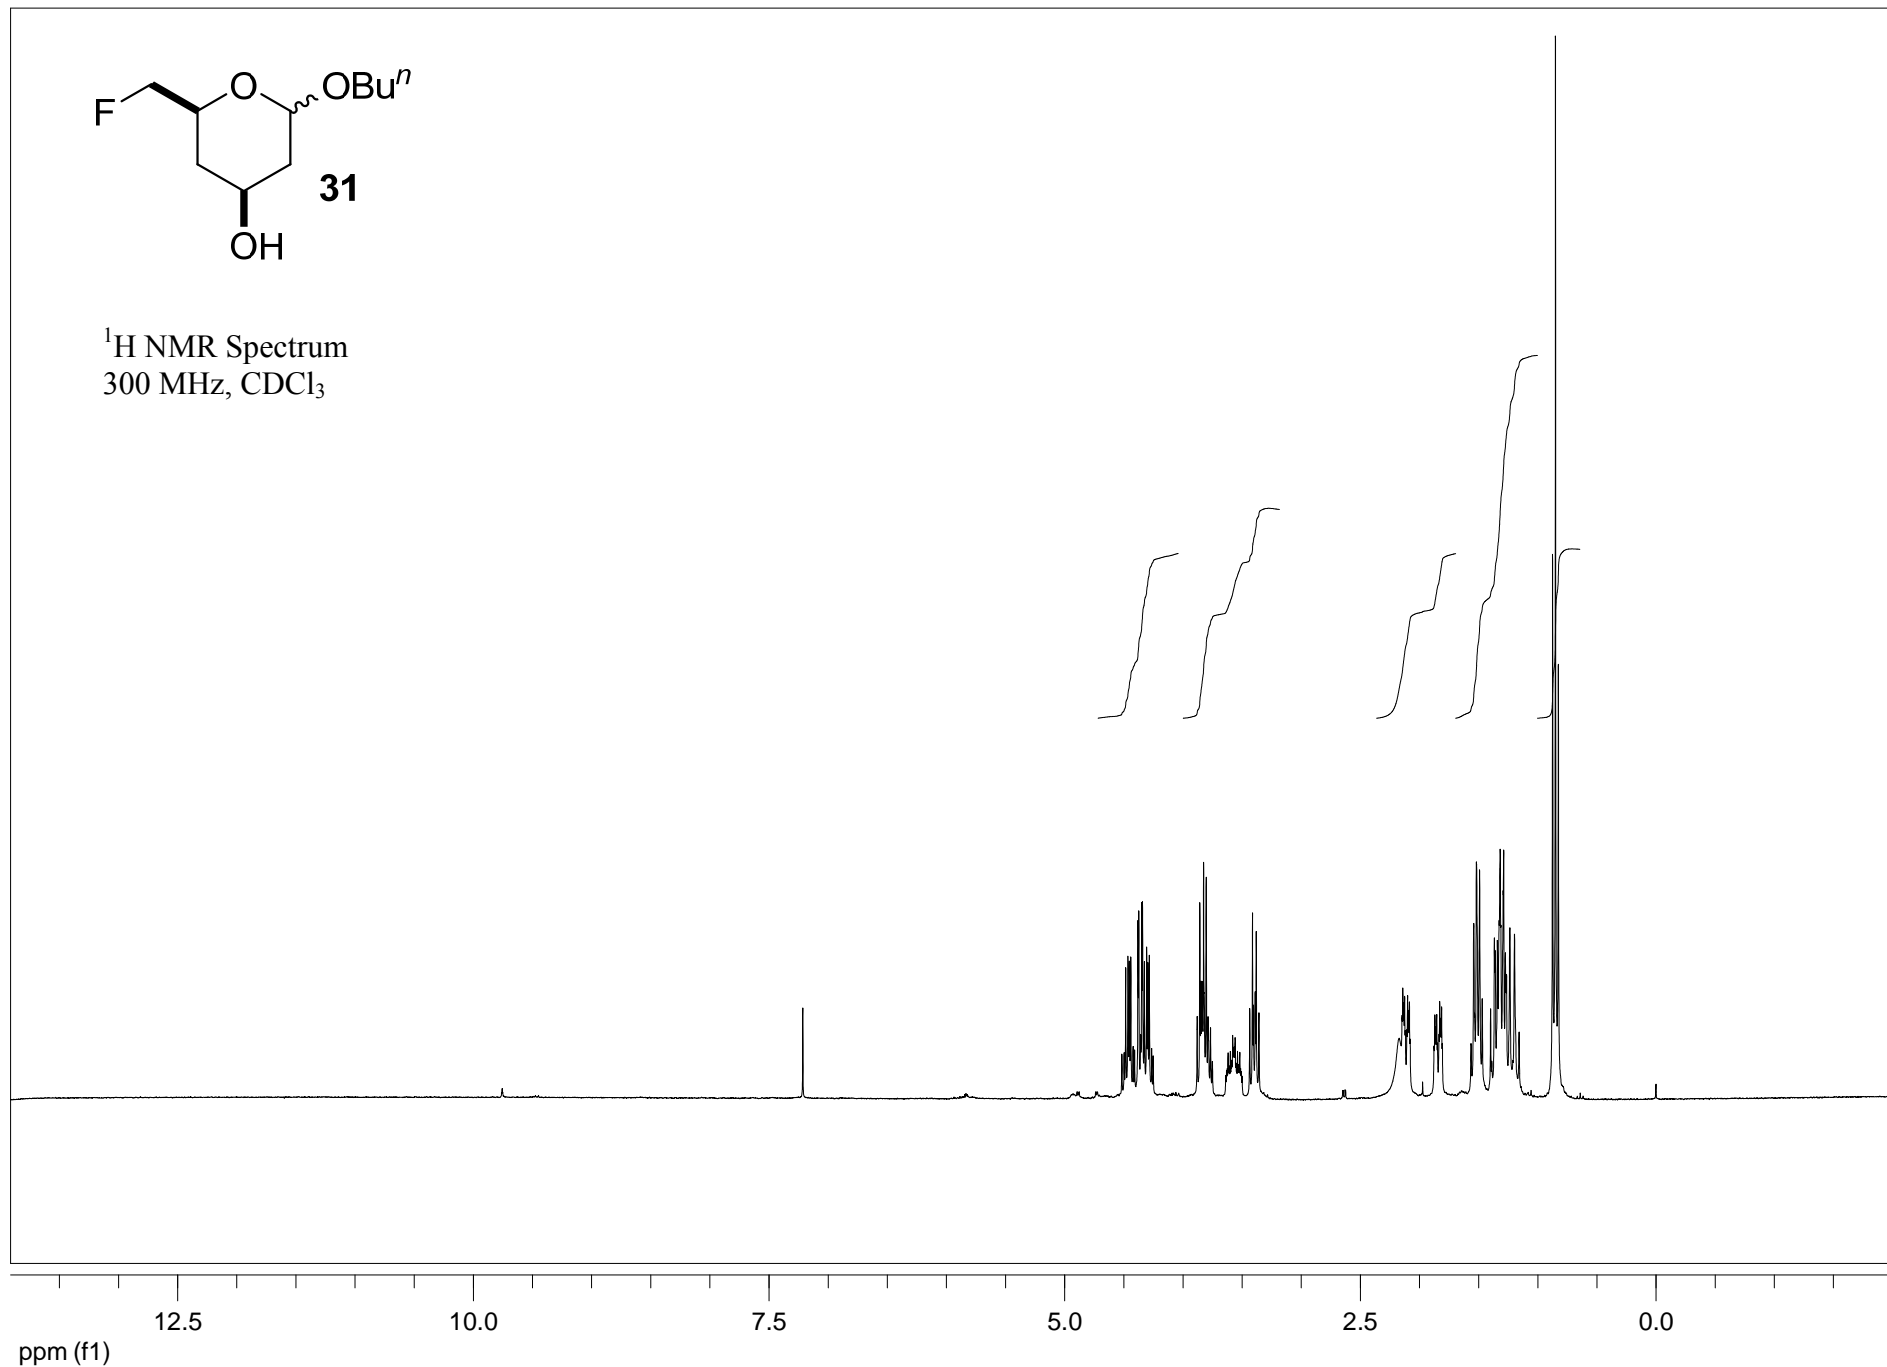

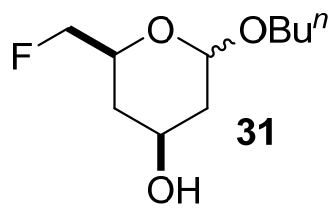

Partial  $^1\text{H}$  NMR Spectrum  
300 MHz,  $\text{CDCl}_3$

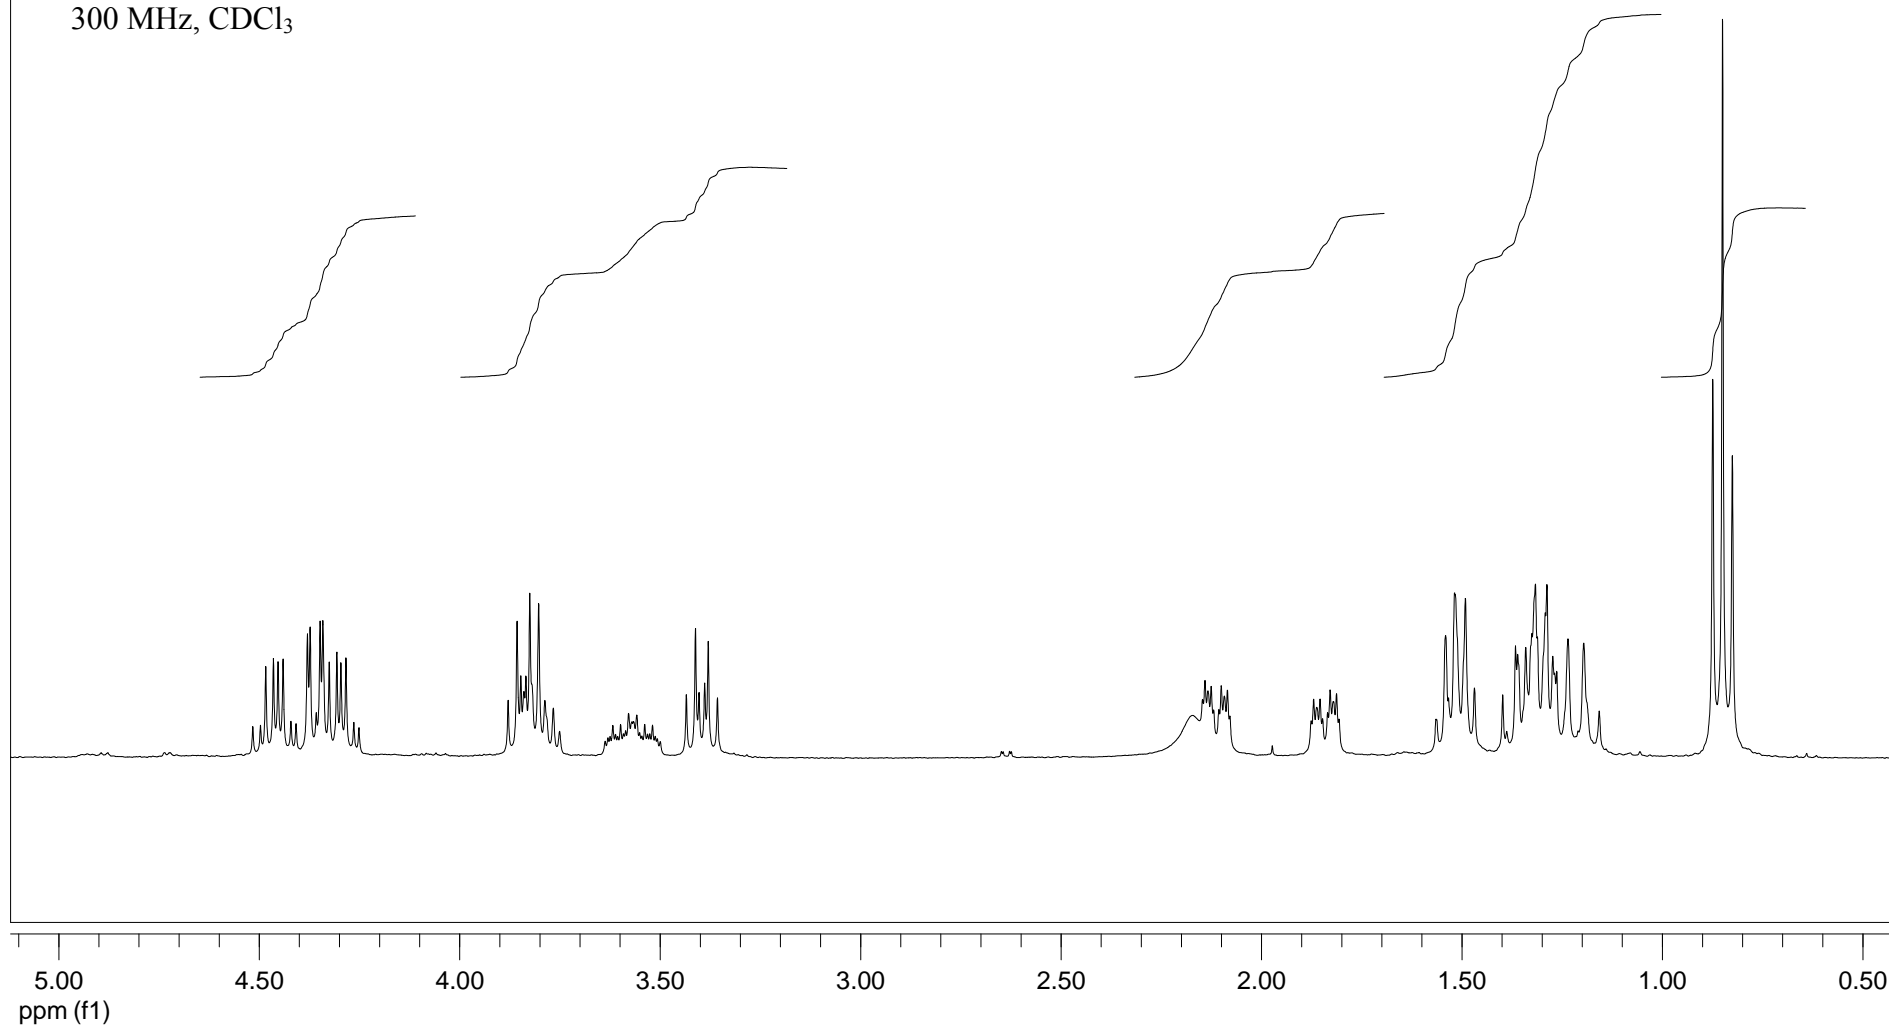

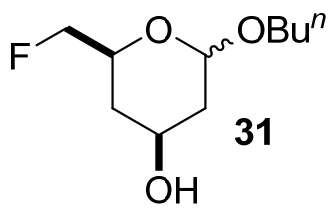

DEPT 135 Spectrum  
75 MHz, CDCl<sub>3</sub>

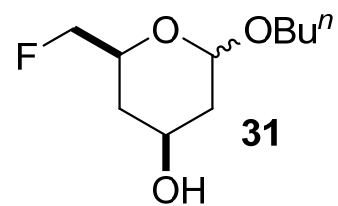

<sup>13</sup>C NMR Spectrum  
75 MHz, CDCl<sub>3</sub>

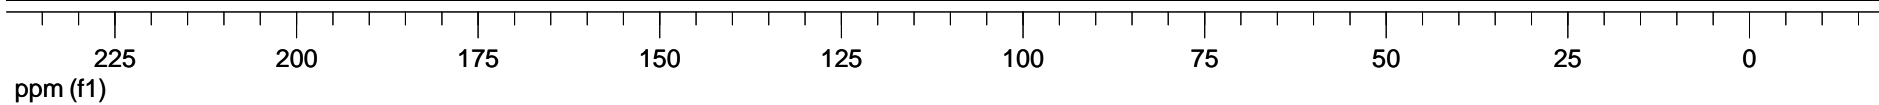



$^{19}\text{F}$  NMR Spectrum  
282 MHz,  $\text{CDCl}_3$

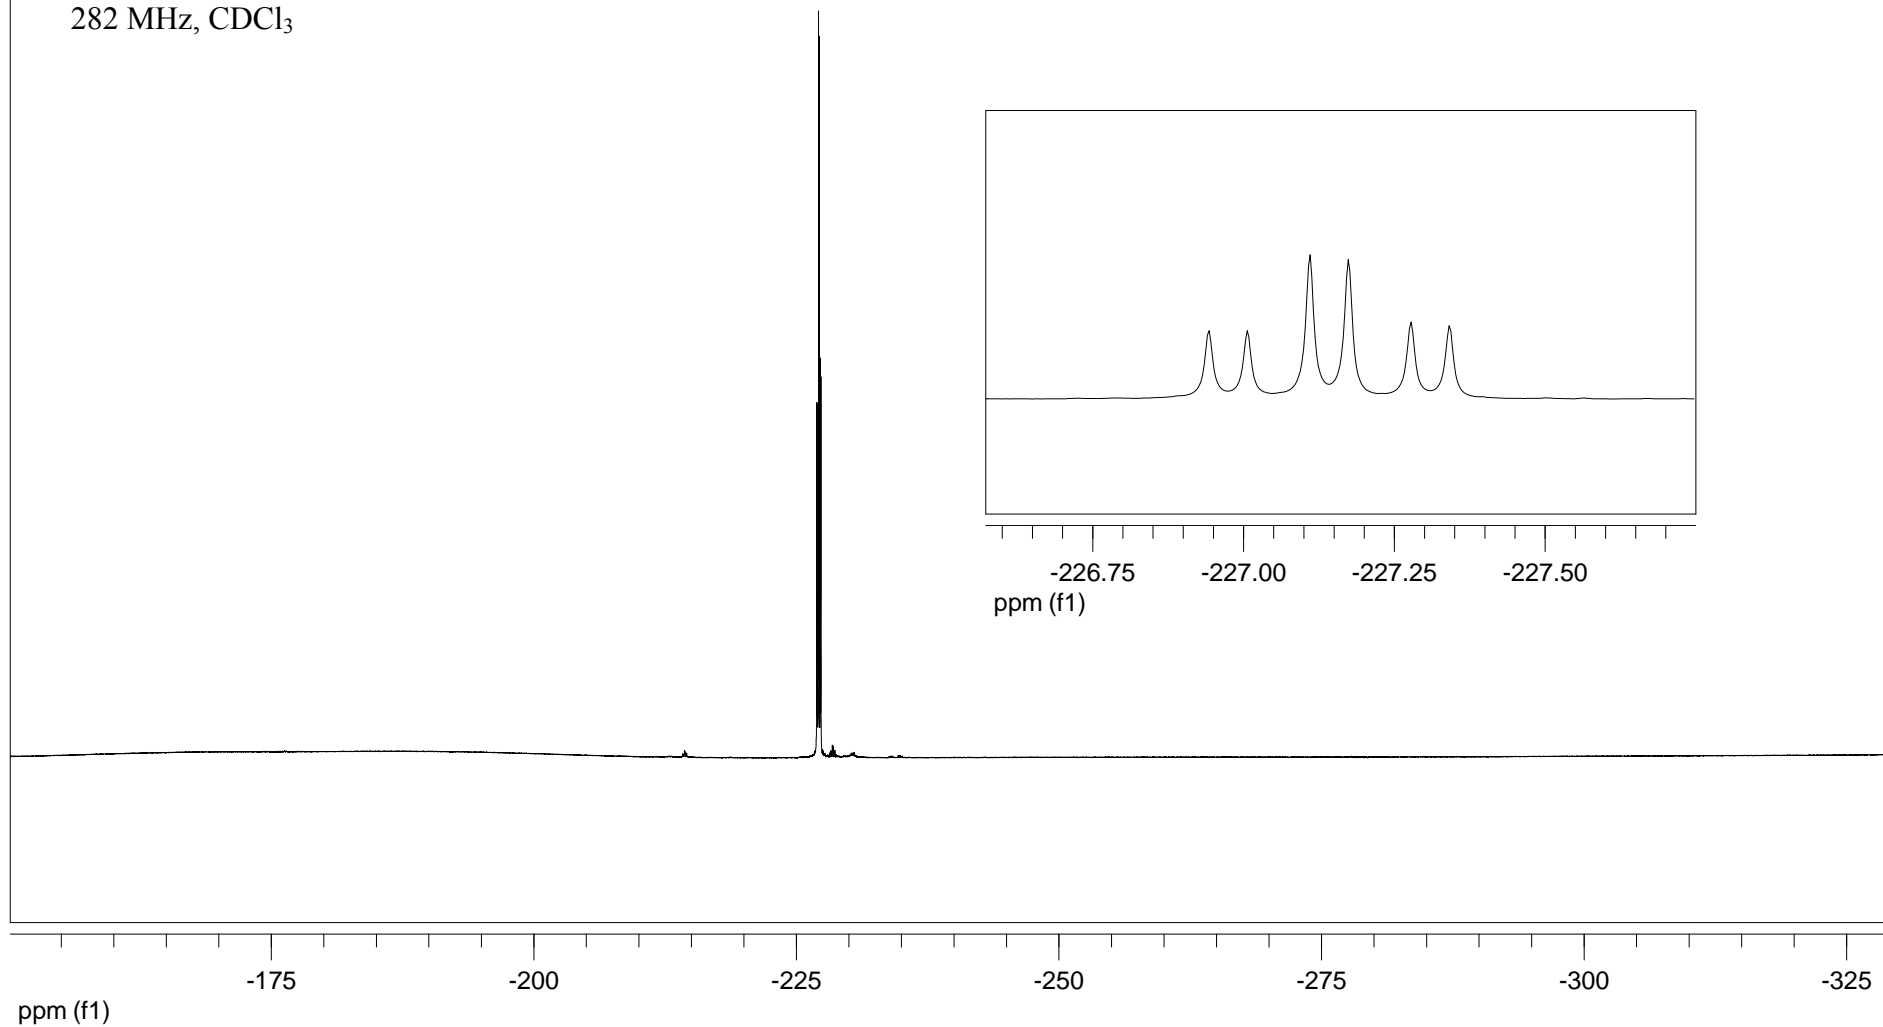



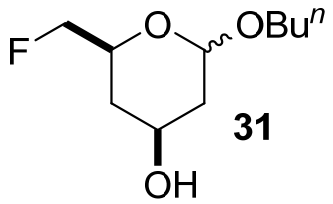

COSY Spectrum, 300 MHz, CDCl<sub>3</sub>

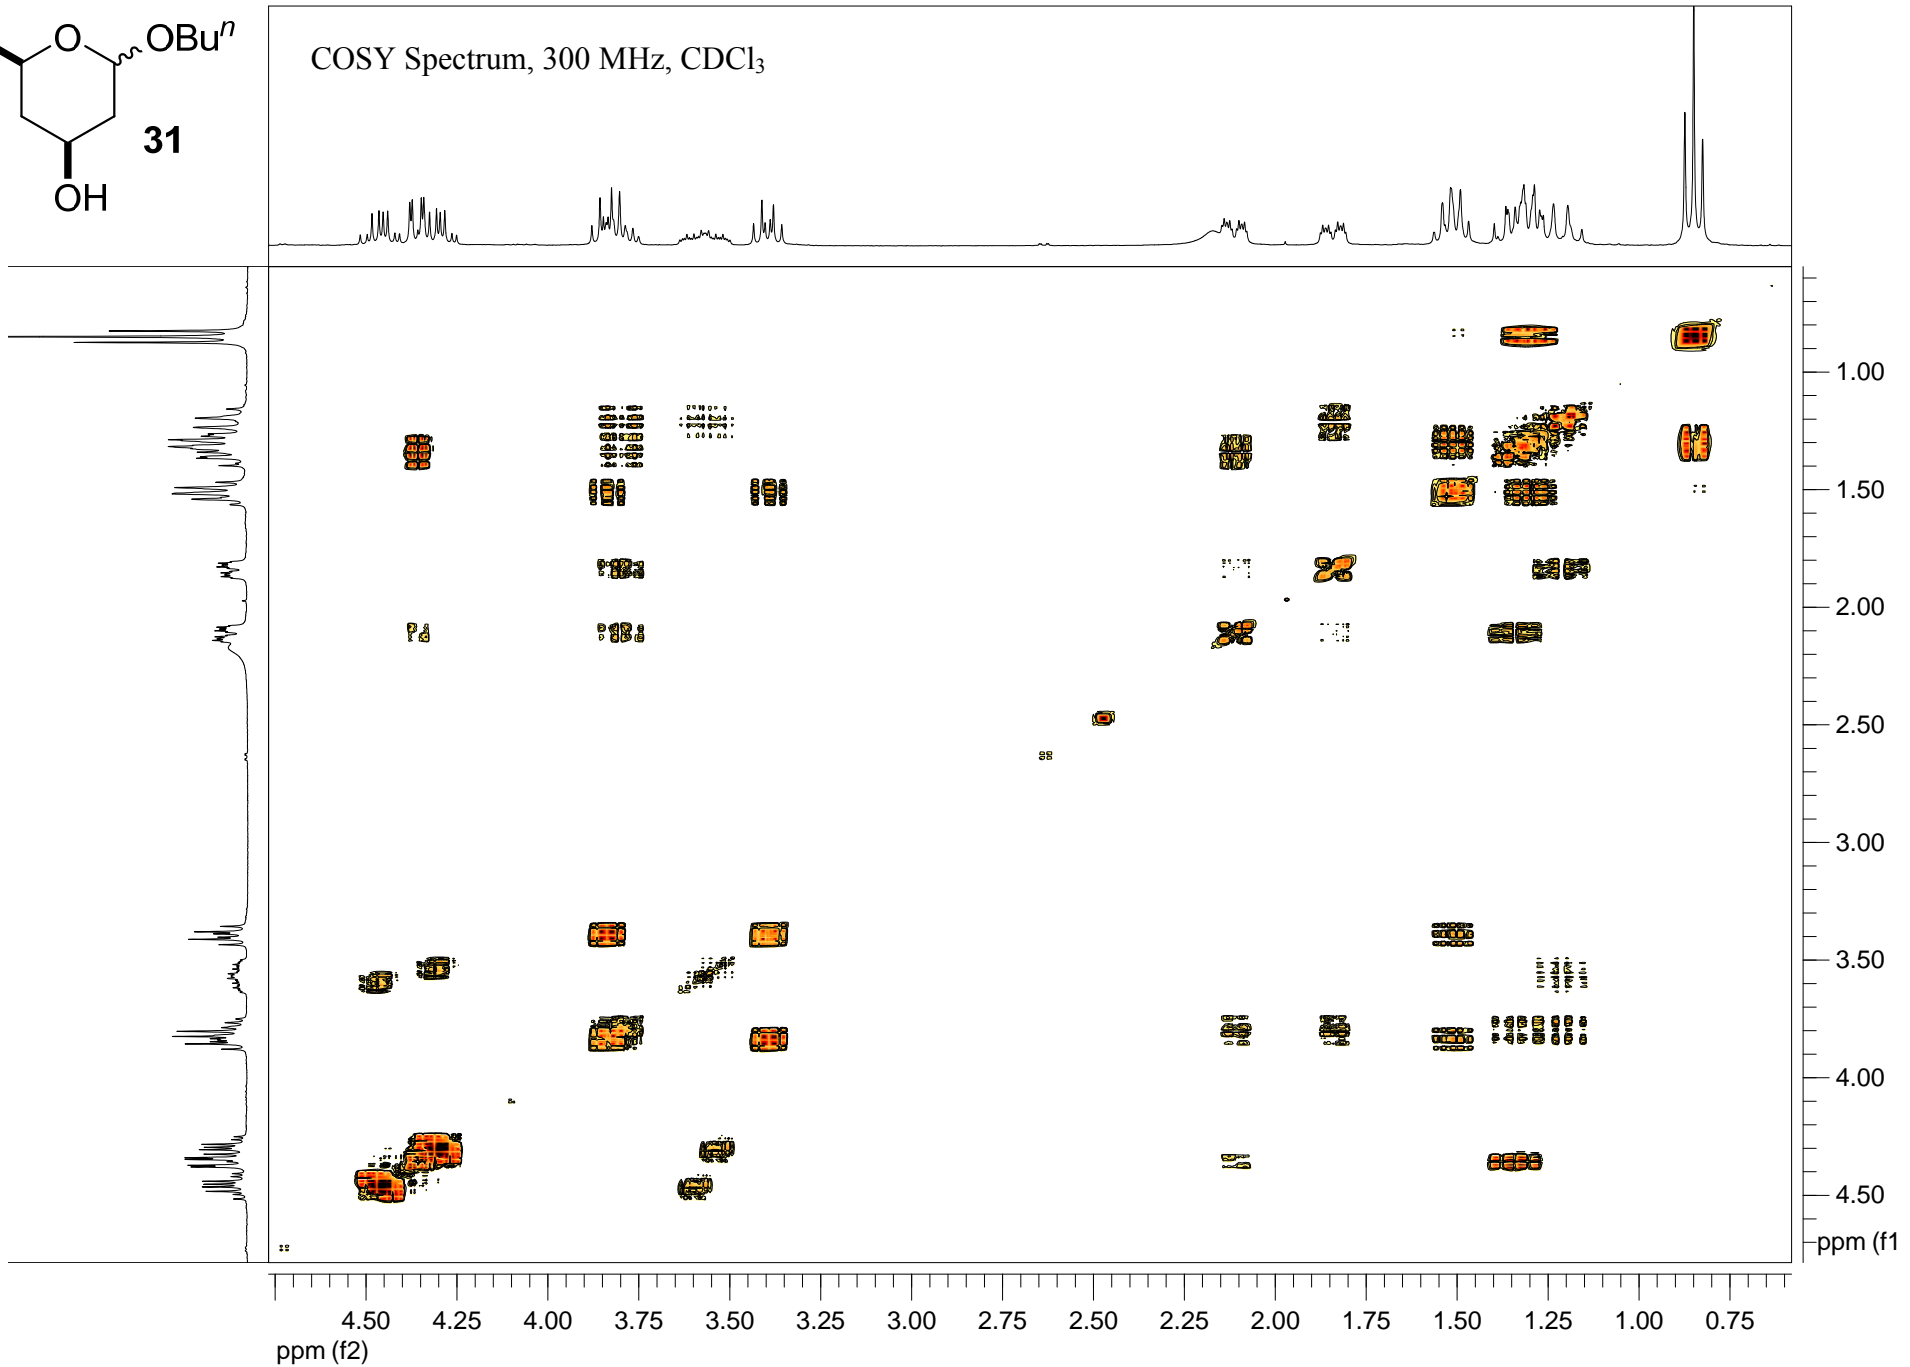

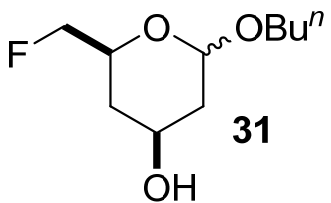

HMQC Spectrum  
CDCl<sub>3</sub>

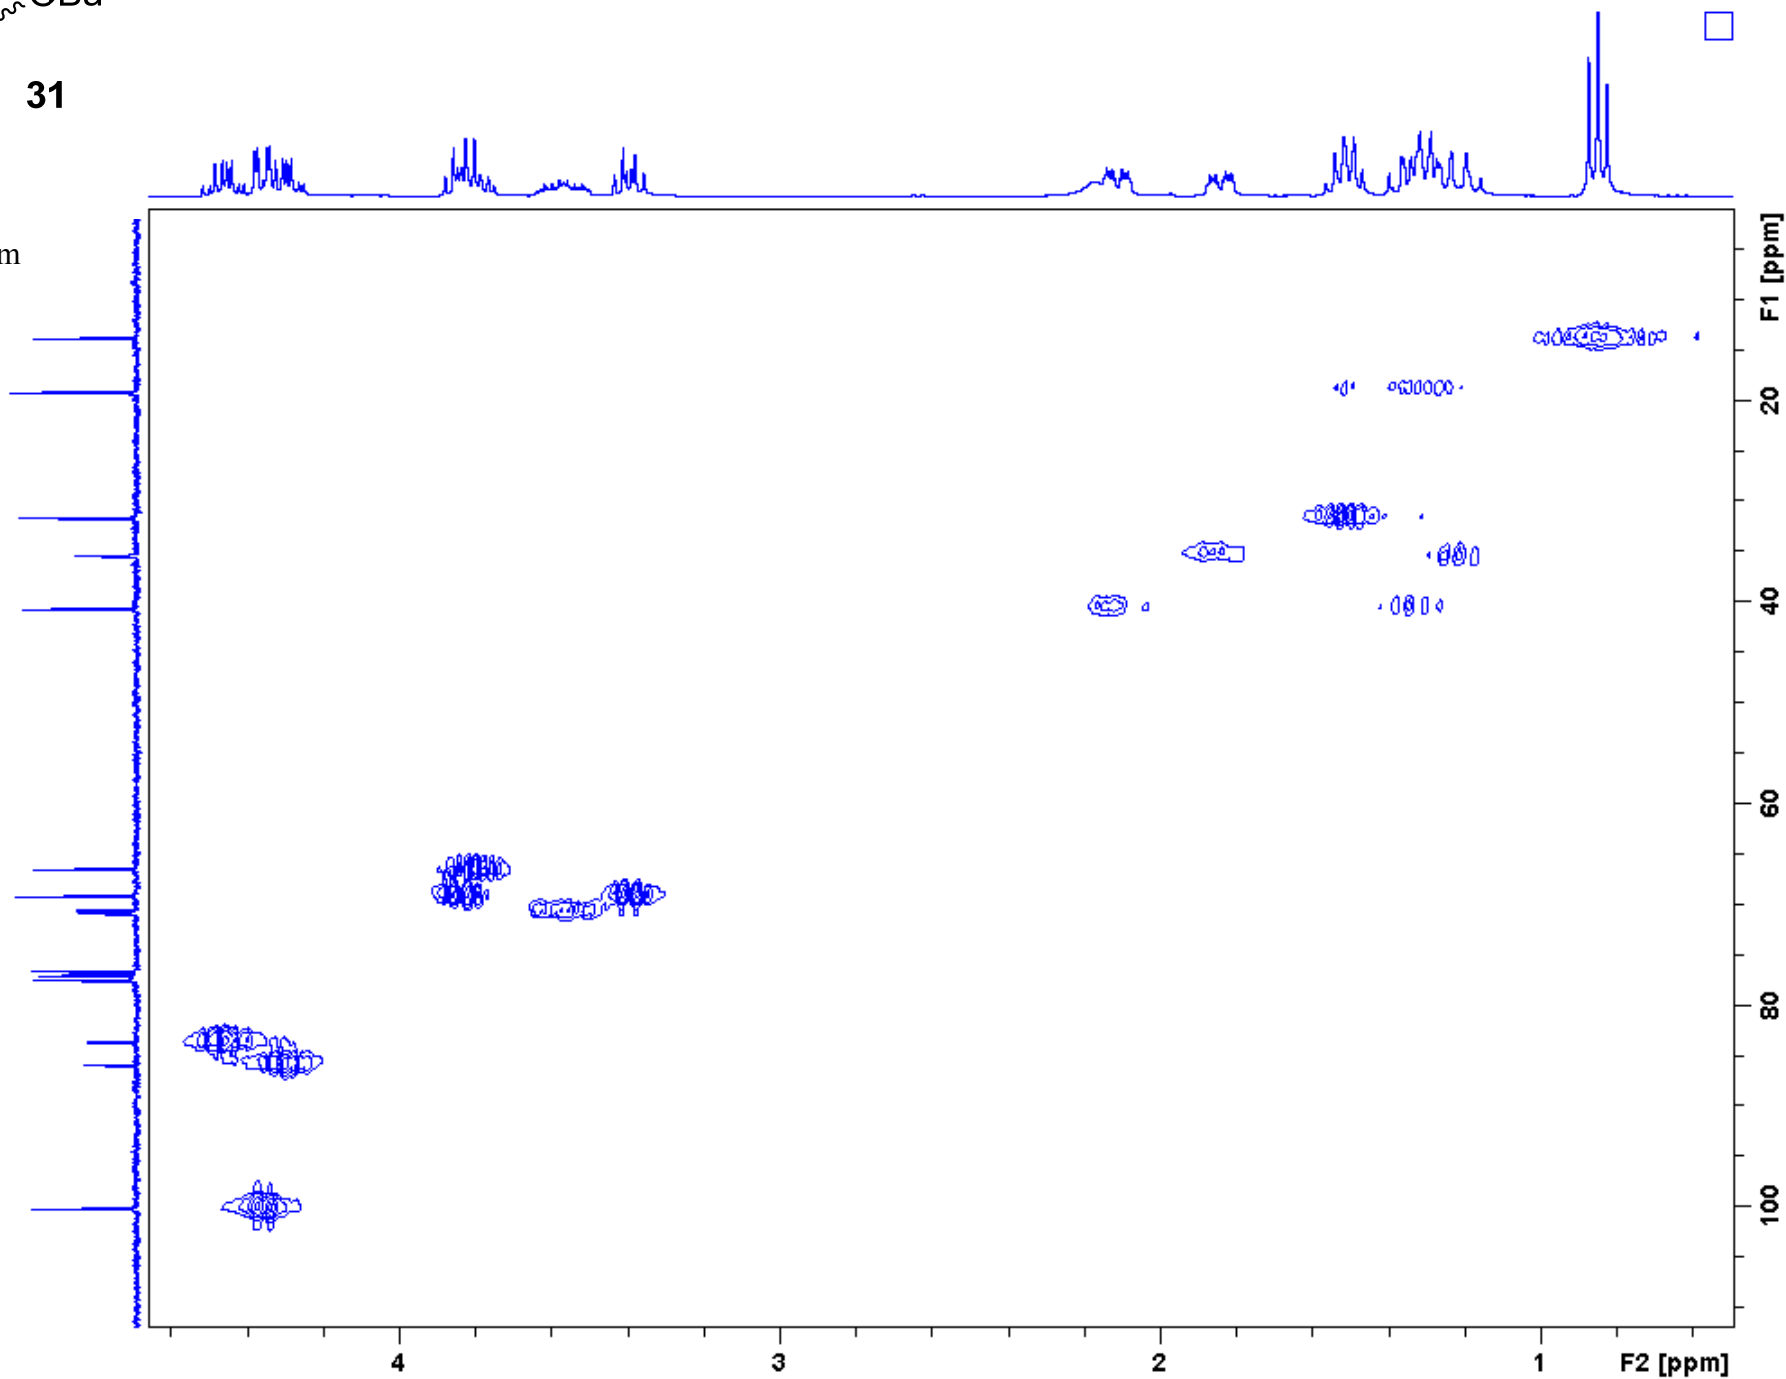

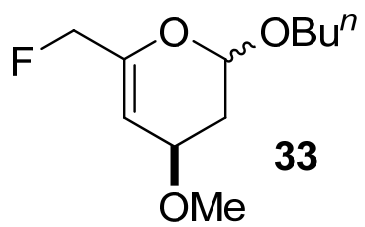

<sup>1</sup>H NMR Spectrum  
300 MHz, CDCl<sub>3</sub>

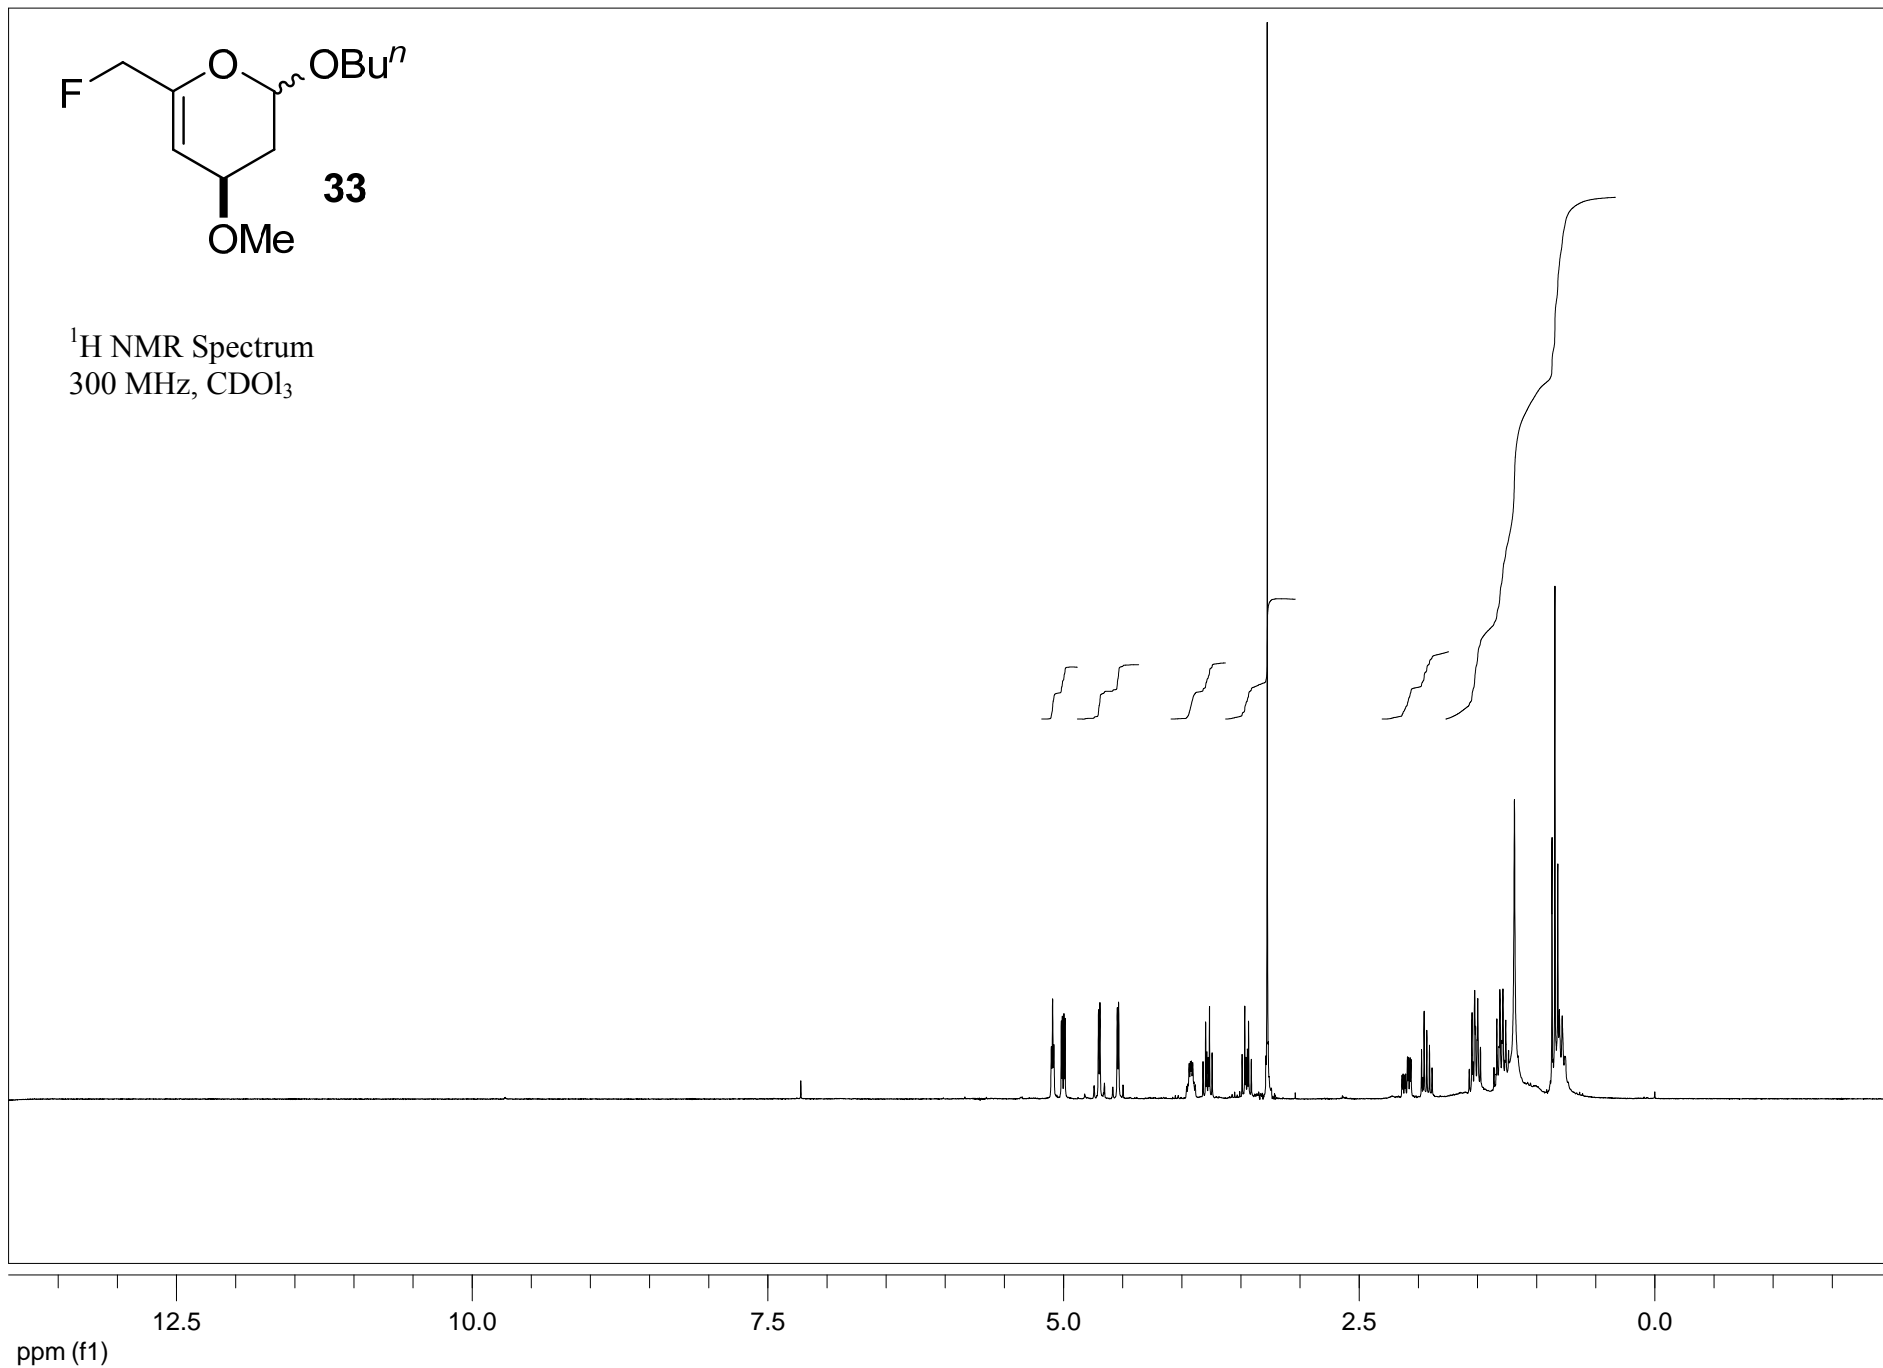

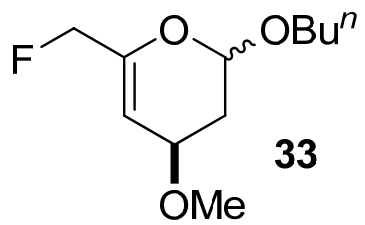

$^1\text{H}$  NMR Spectrum  
300 MHz,  $\text{CDCl}_3$

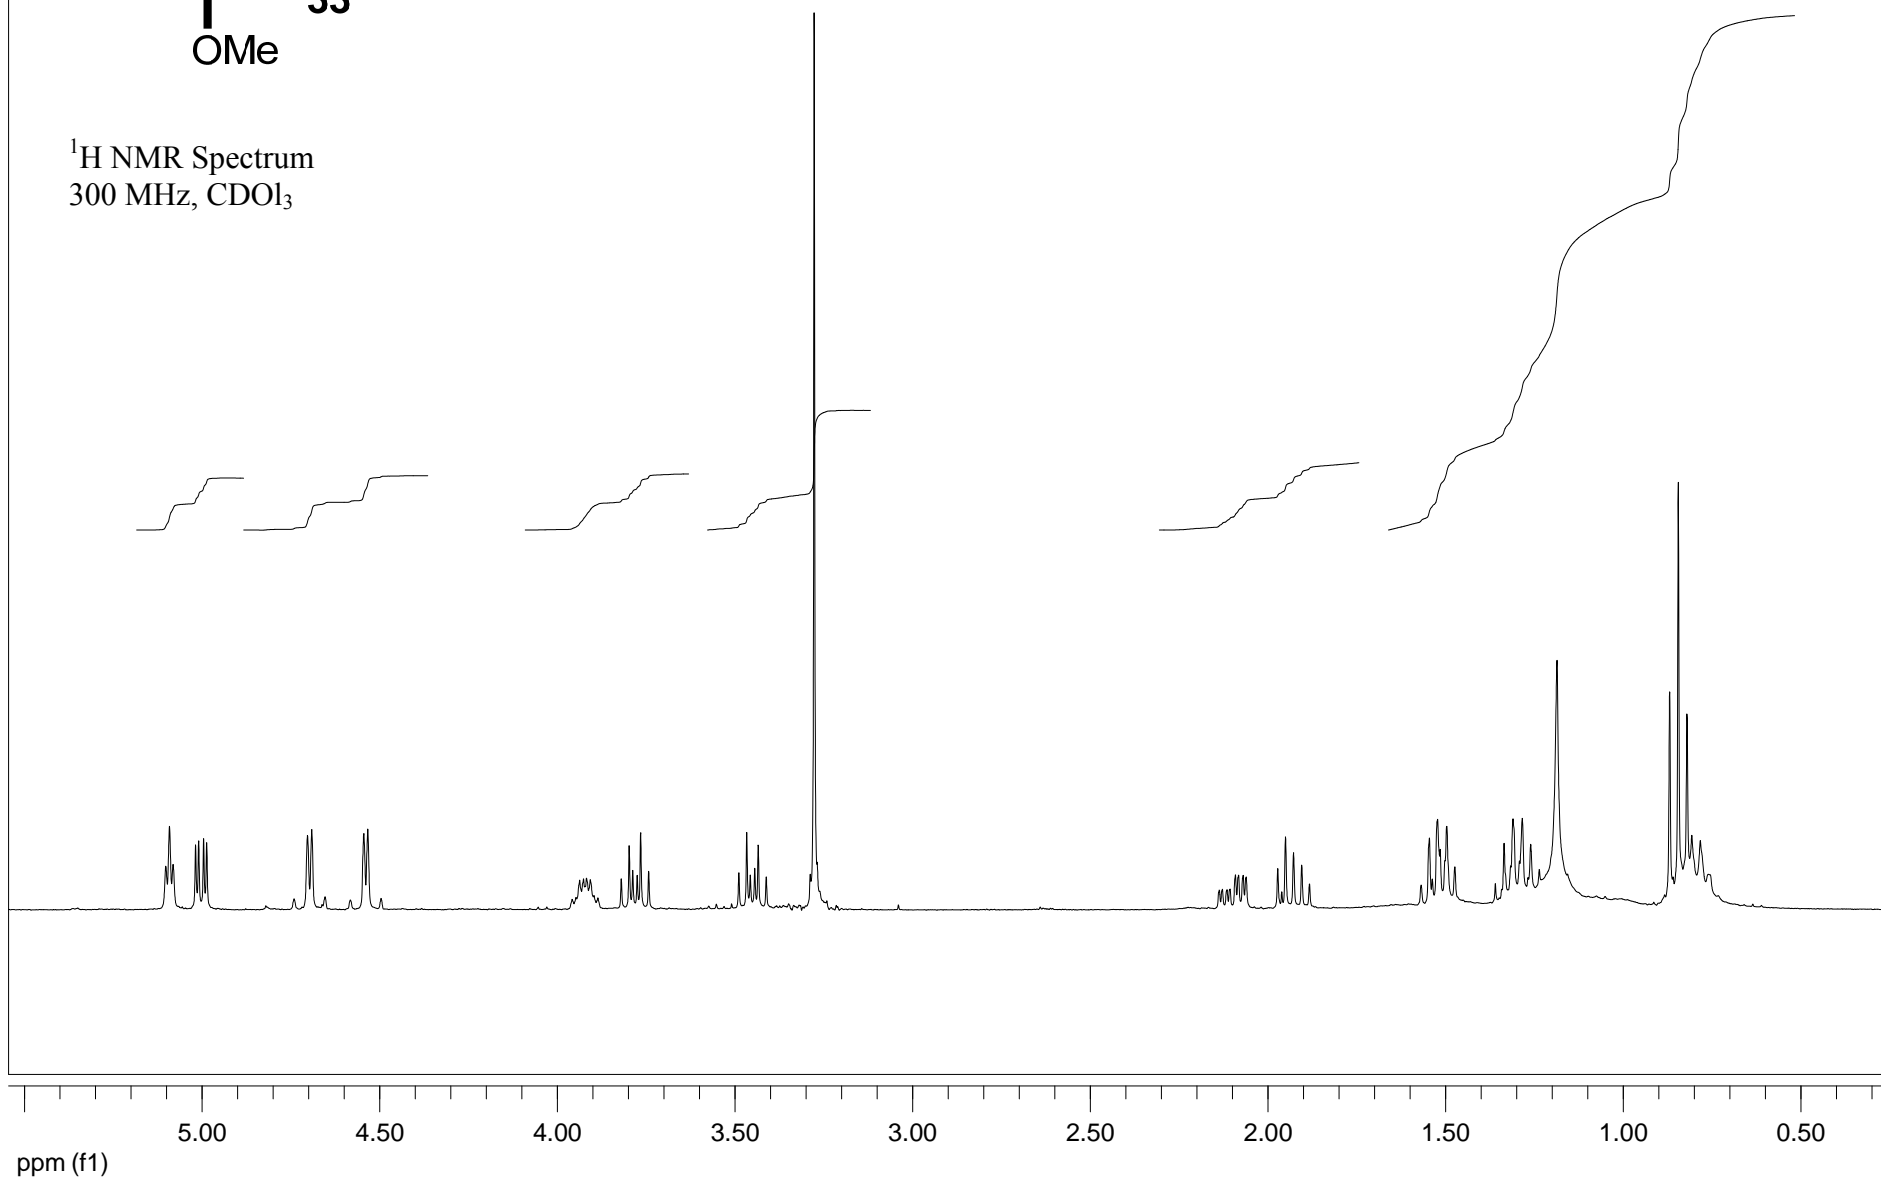

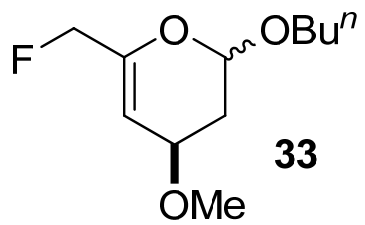

$^{19}\text{F}$  NMR Spectrum  
282 MHz,  $\text{CDCl}_3$

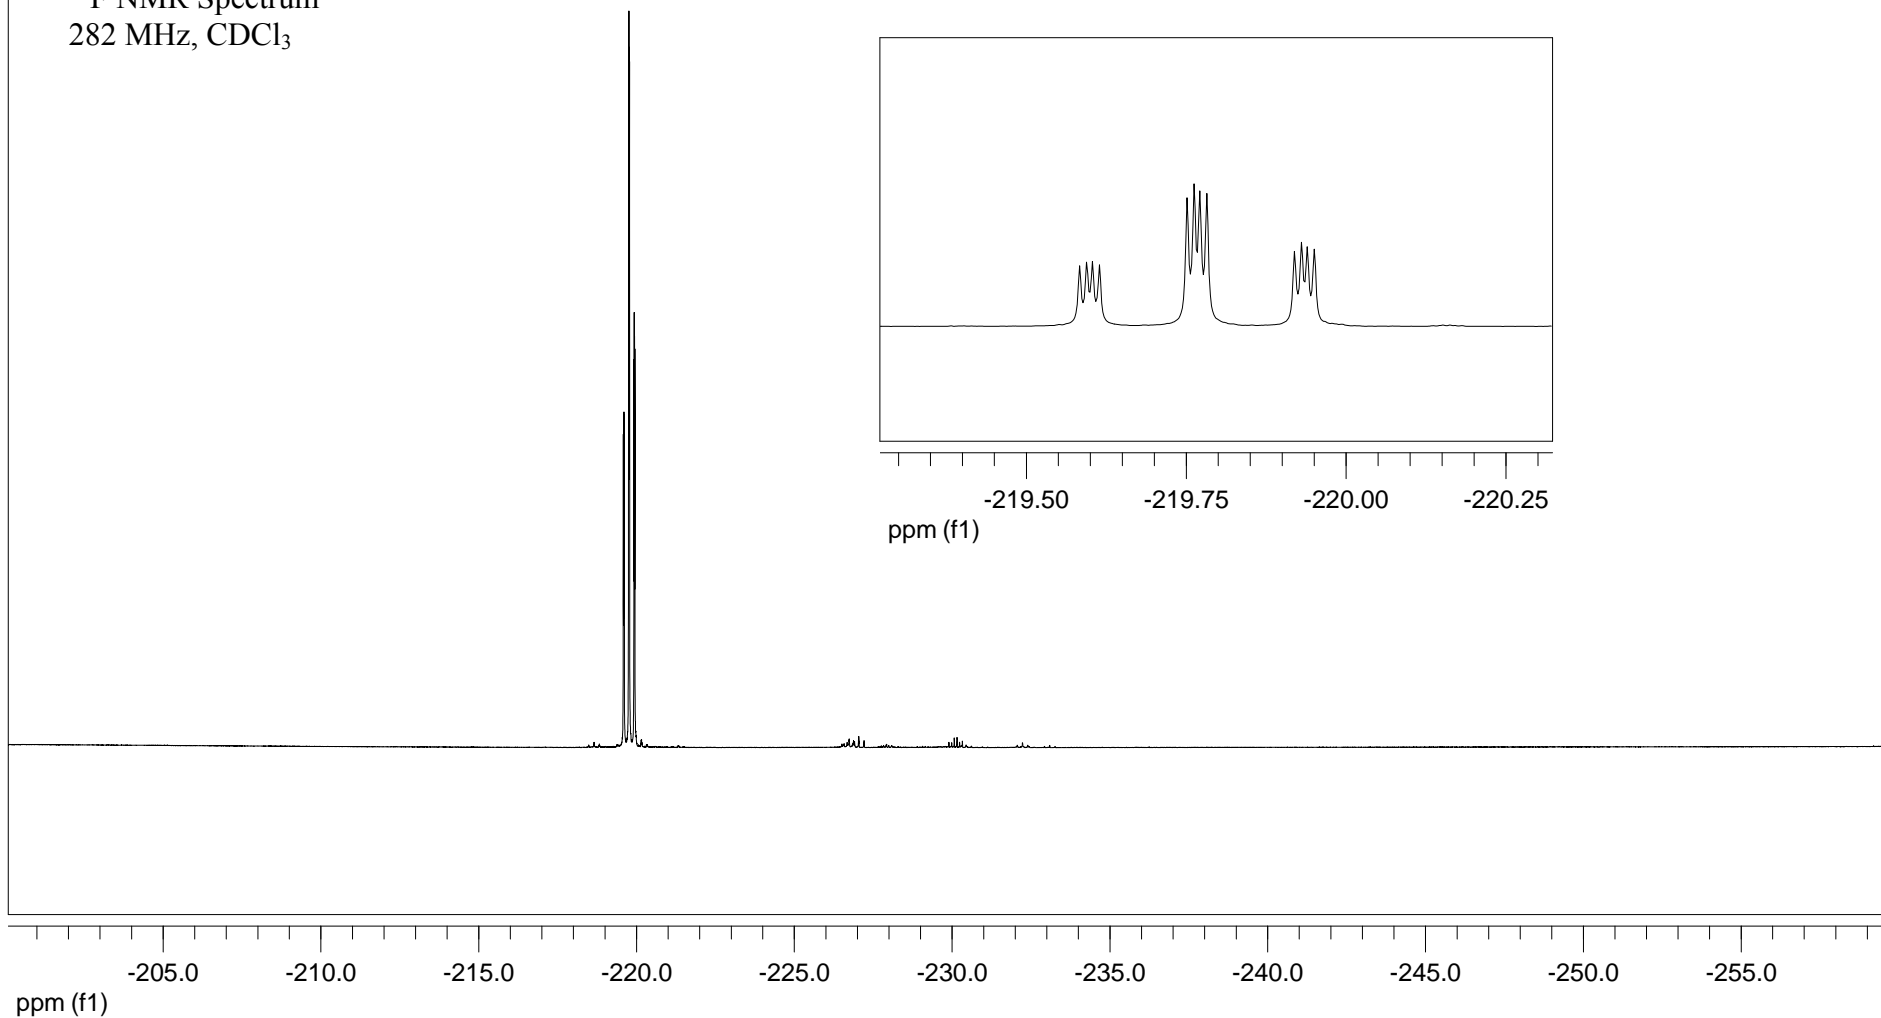

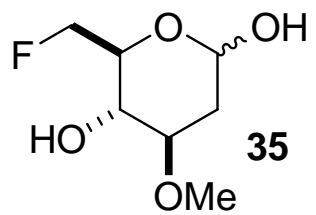

<sup>1</sup>H NMR Spectrum  
300 MHz, Acetone-d<sub>6</sub>

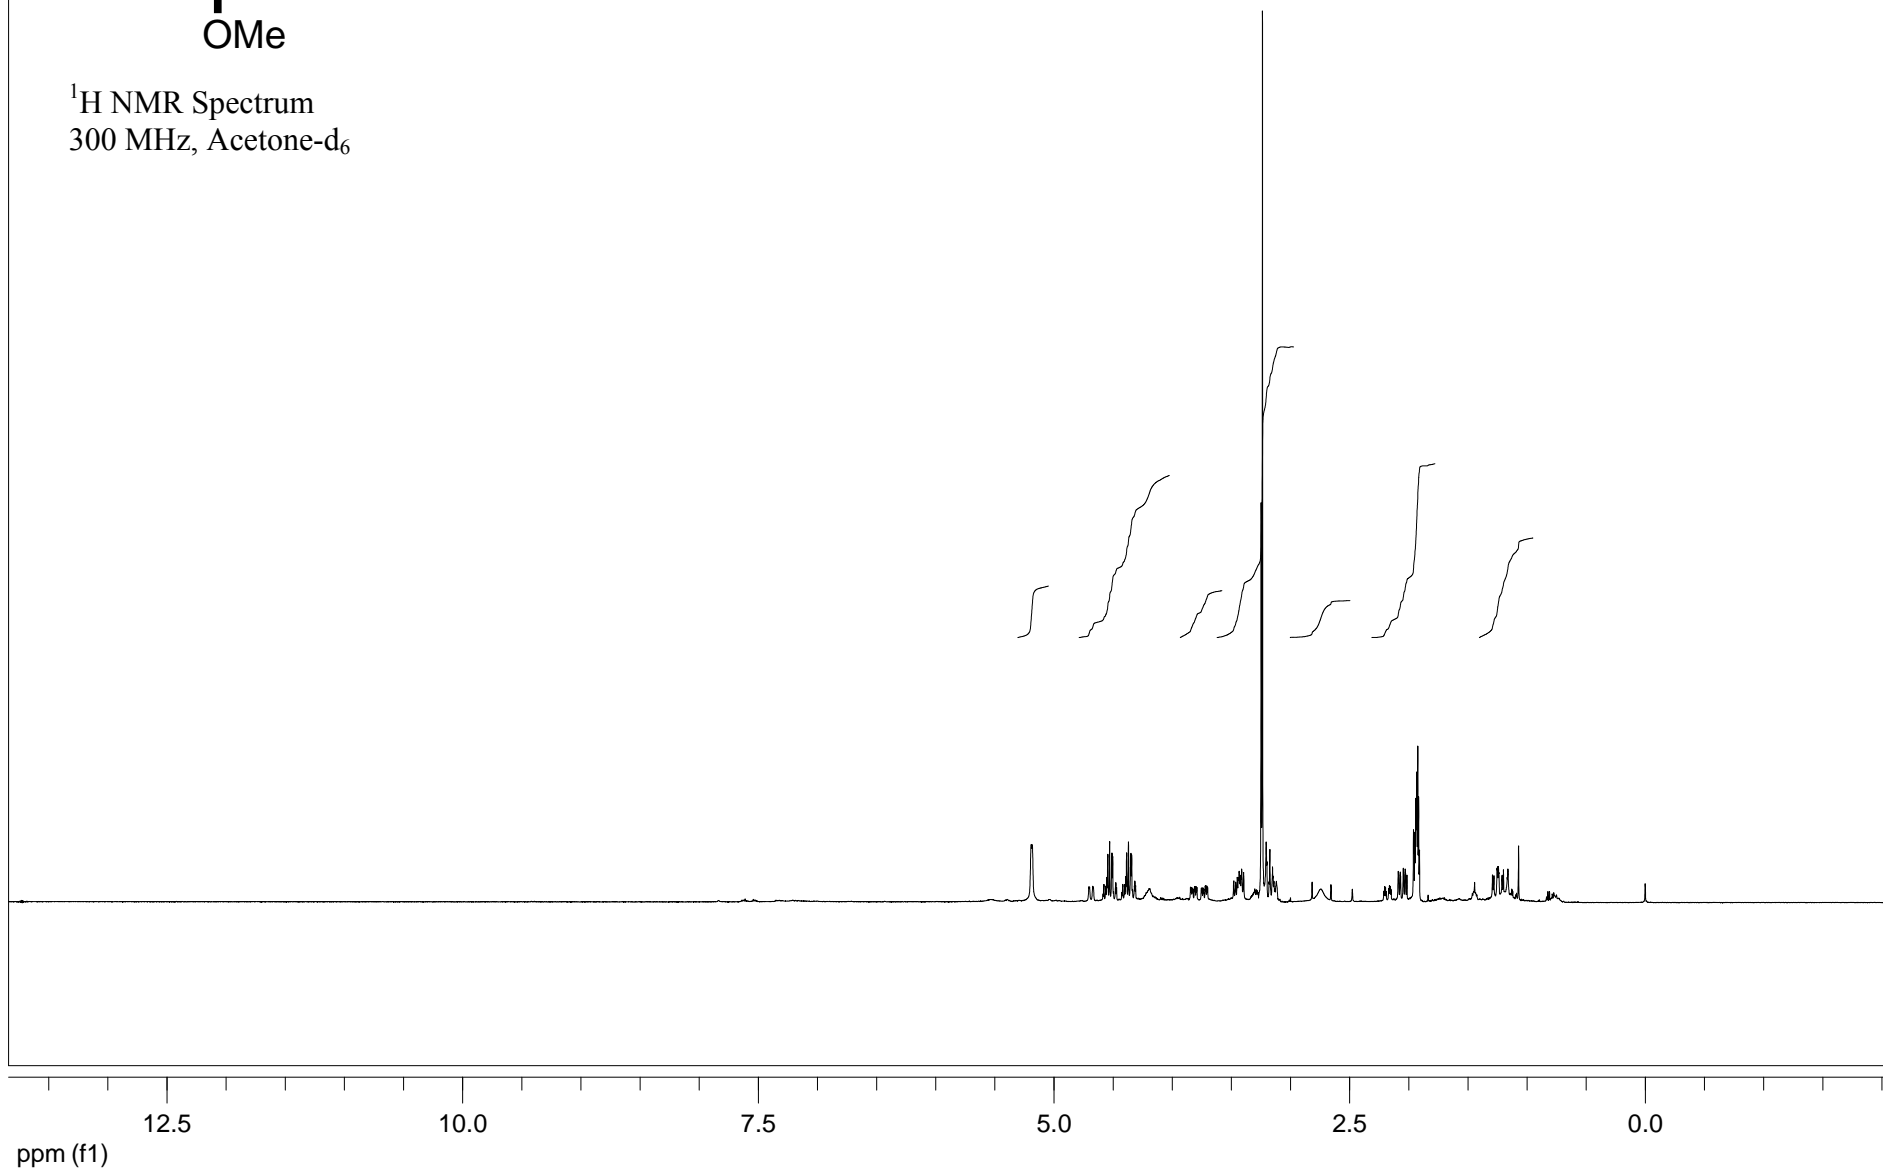

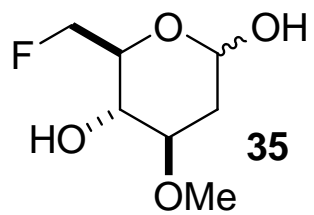

<sup>1</sup>H NMR Spectrum  
expansion

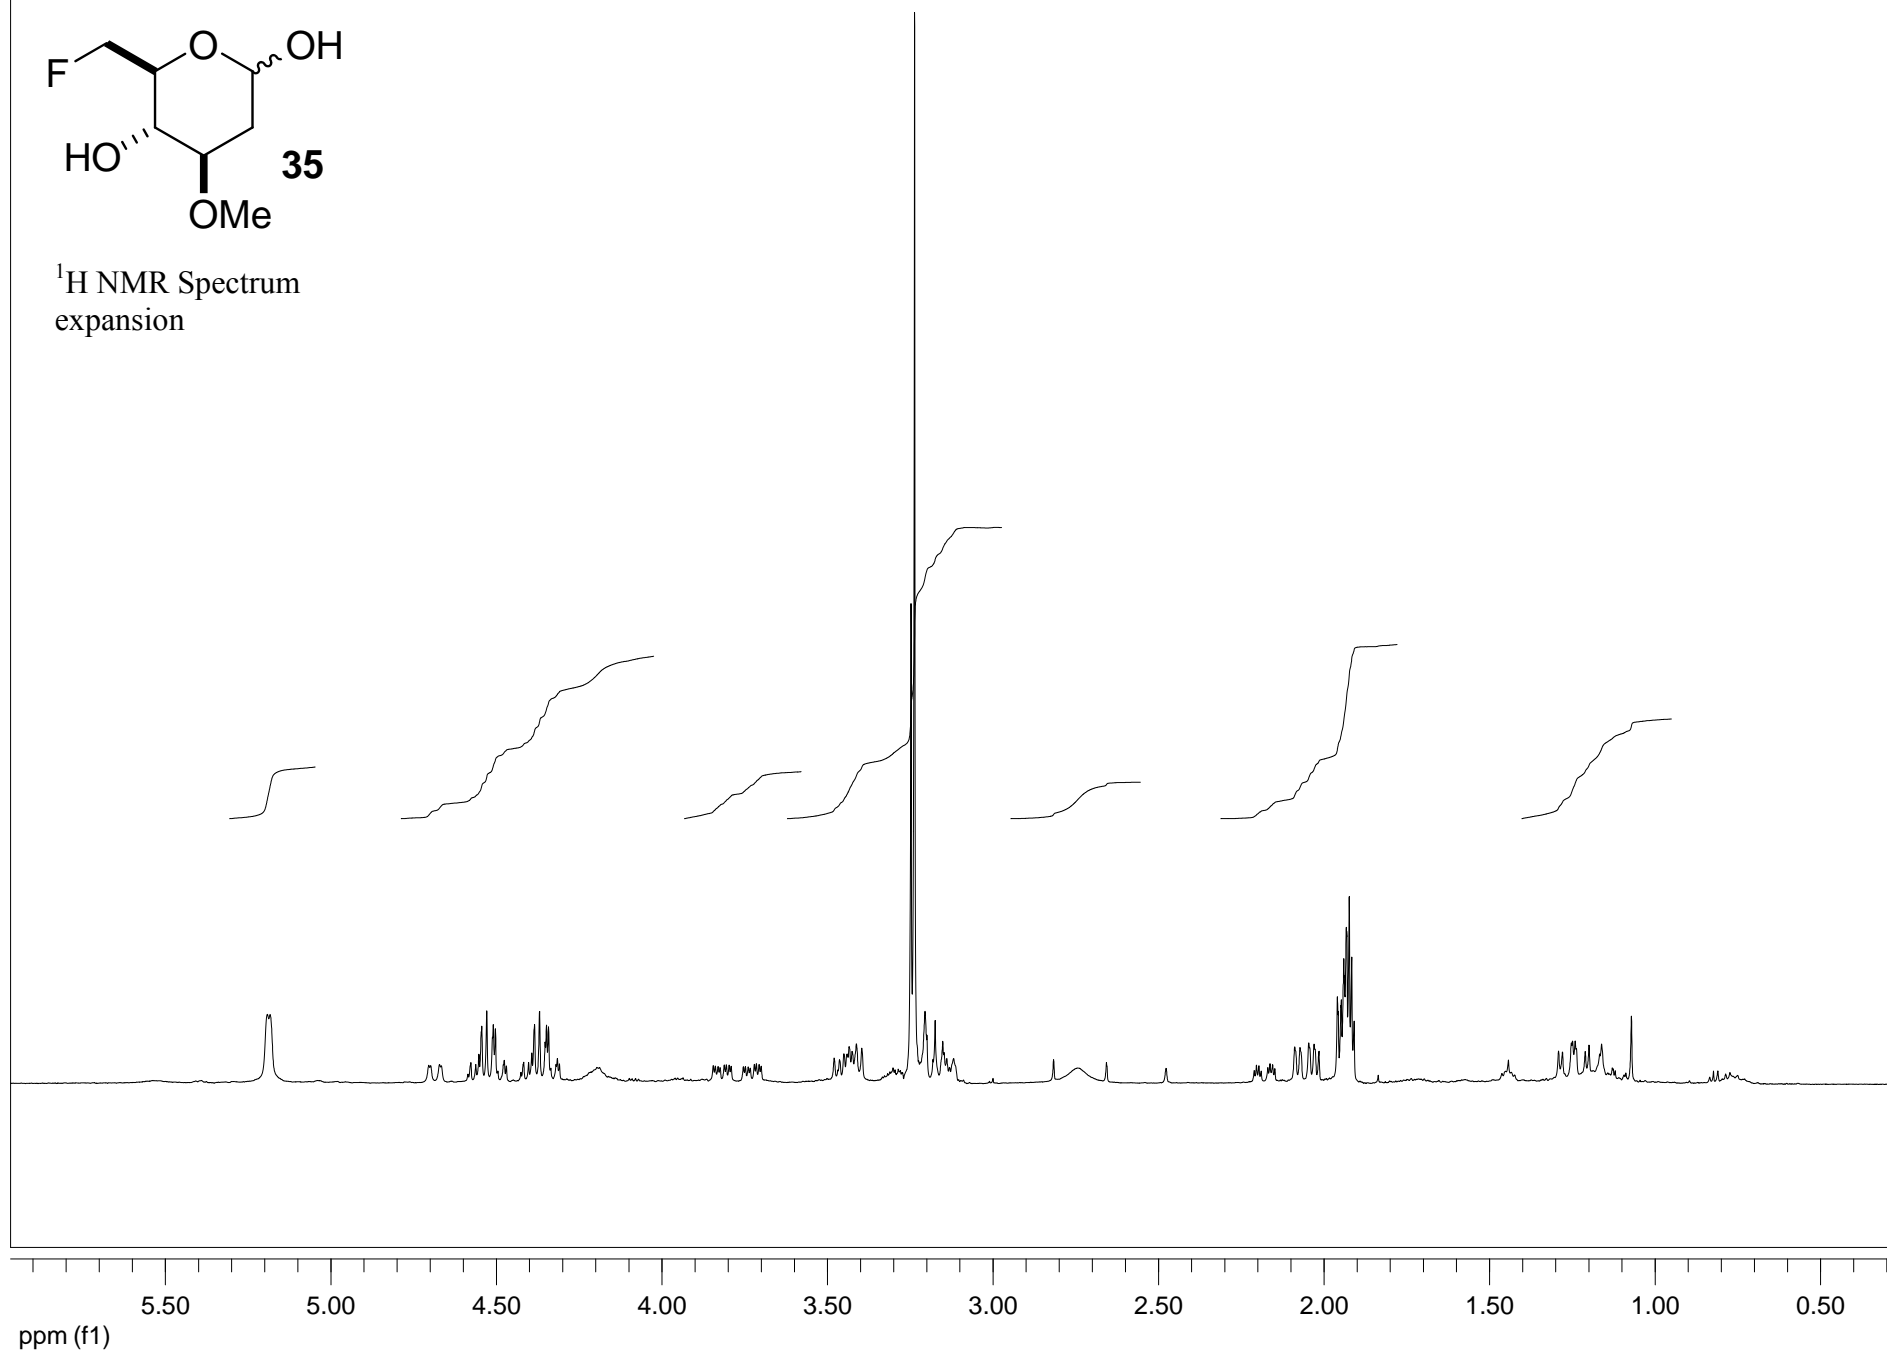

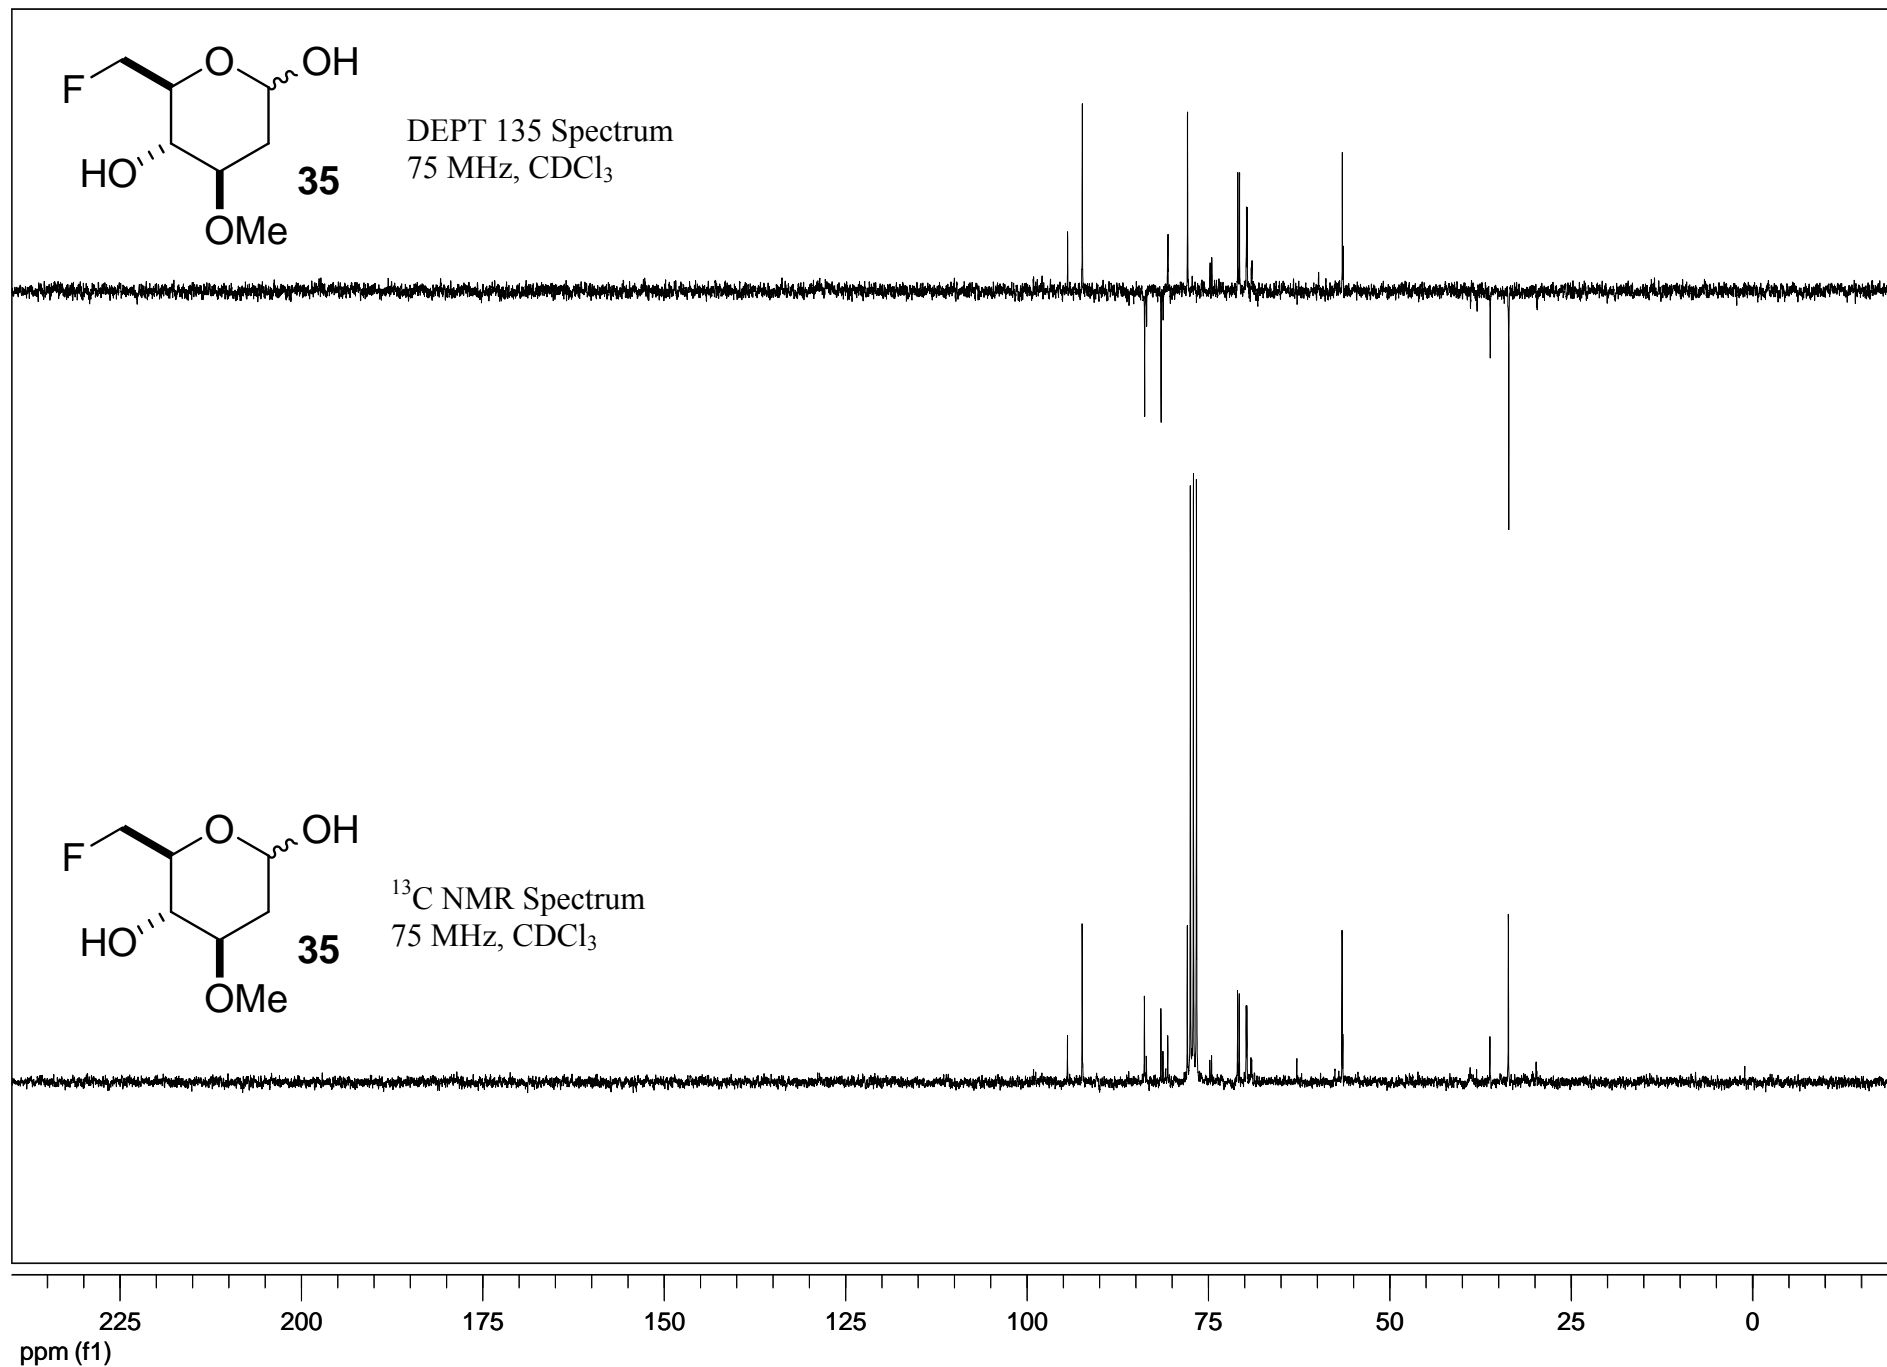





<sup>19</sup>F NMR Spectrum  
282 MHz, Acetone-d<sub>6</sub>

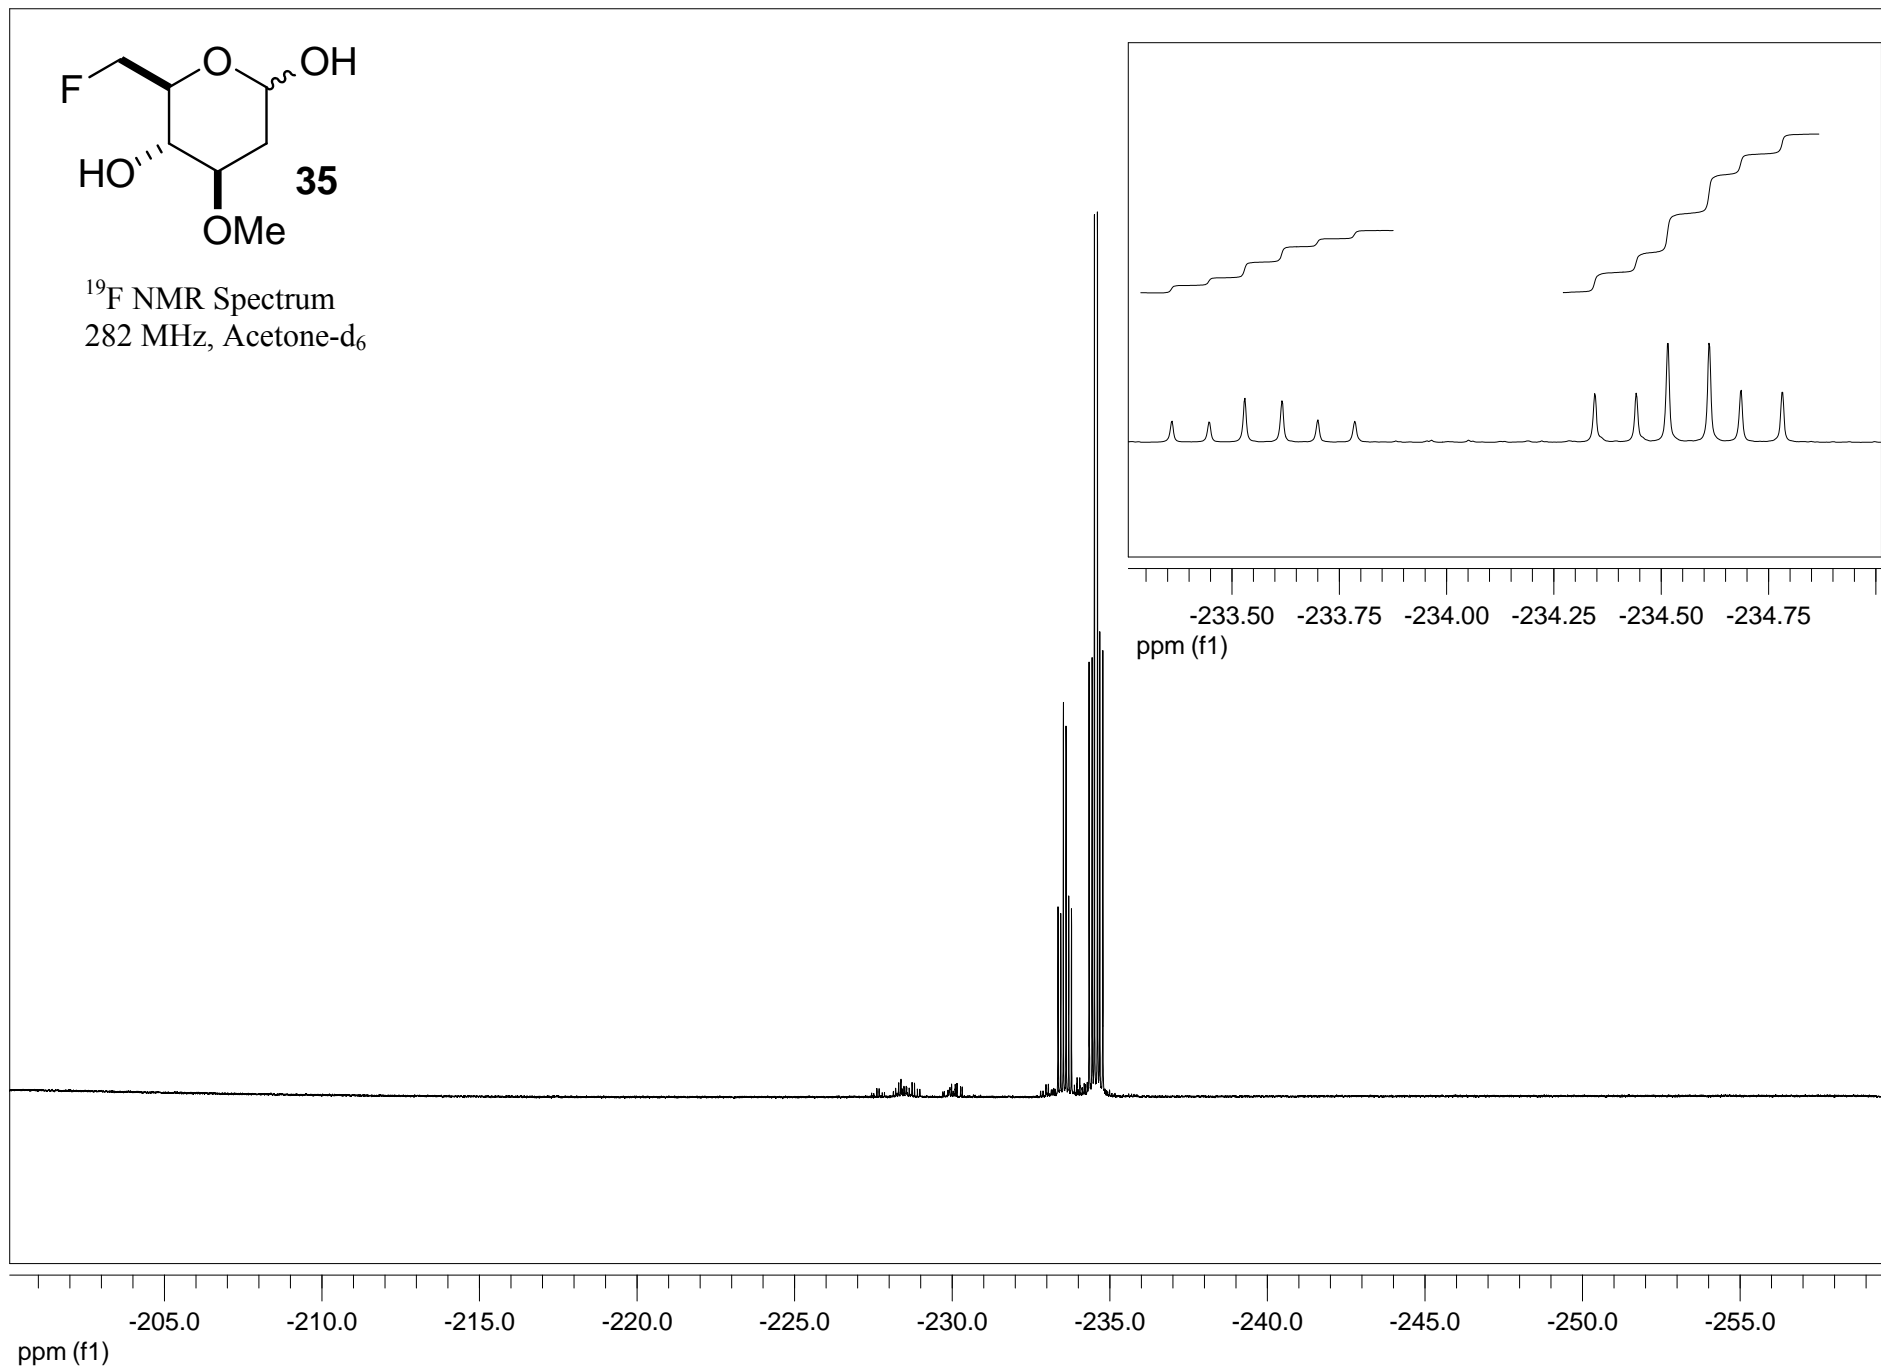

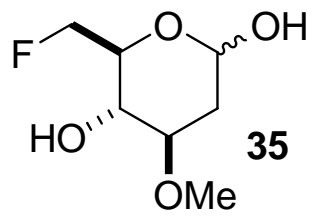

COSY Spectrum, 300 MHz, CDCl<sub>3</sub>

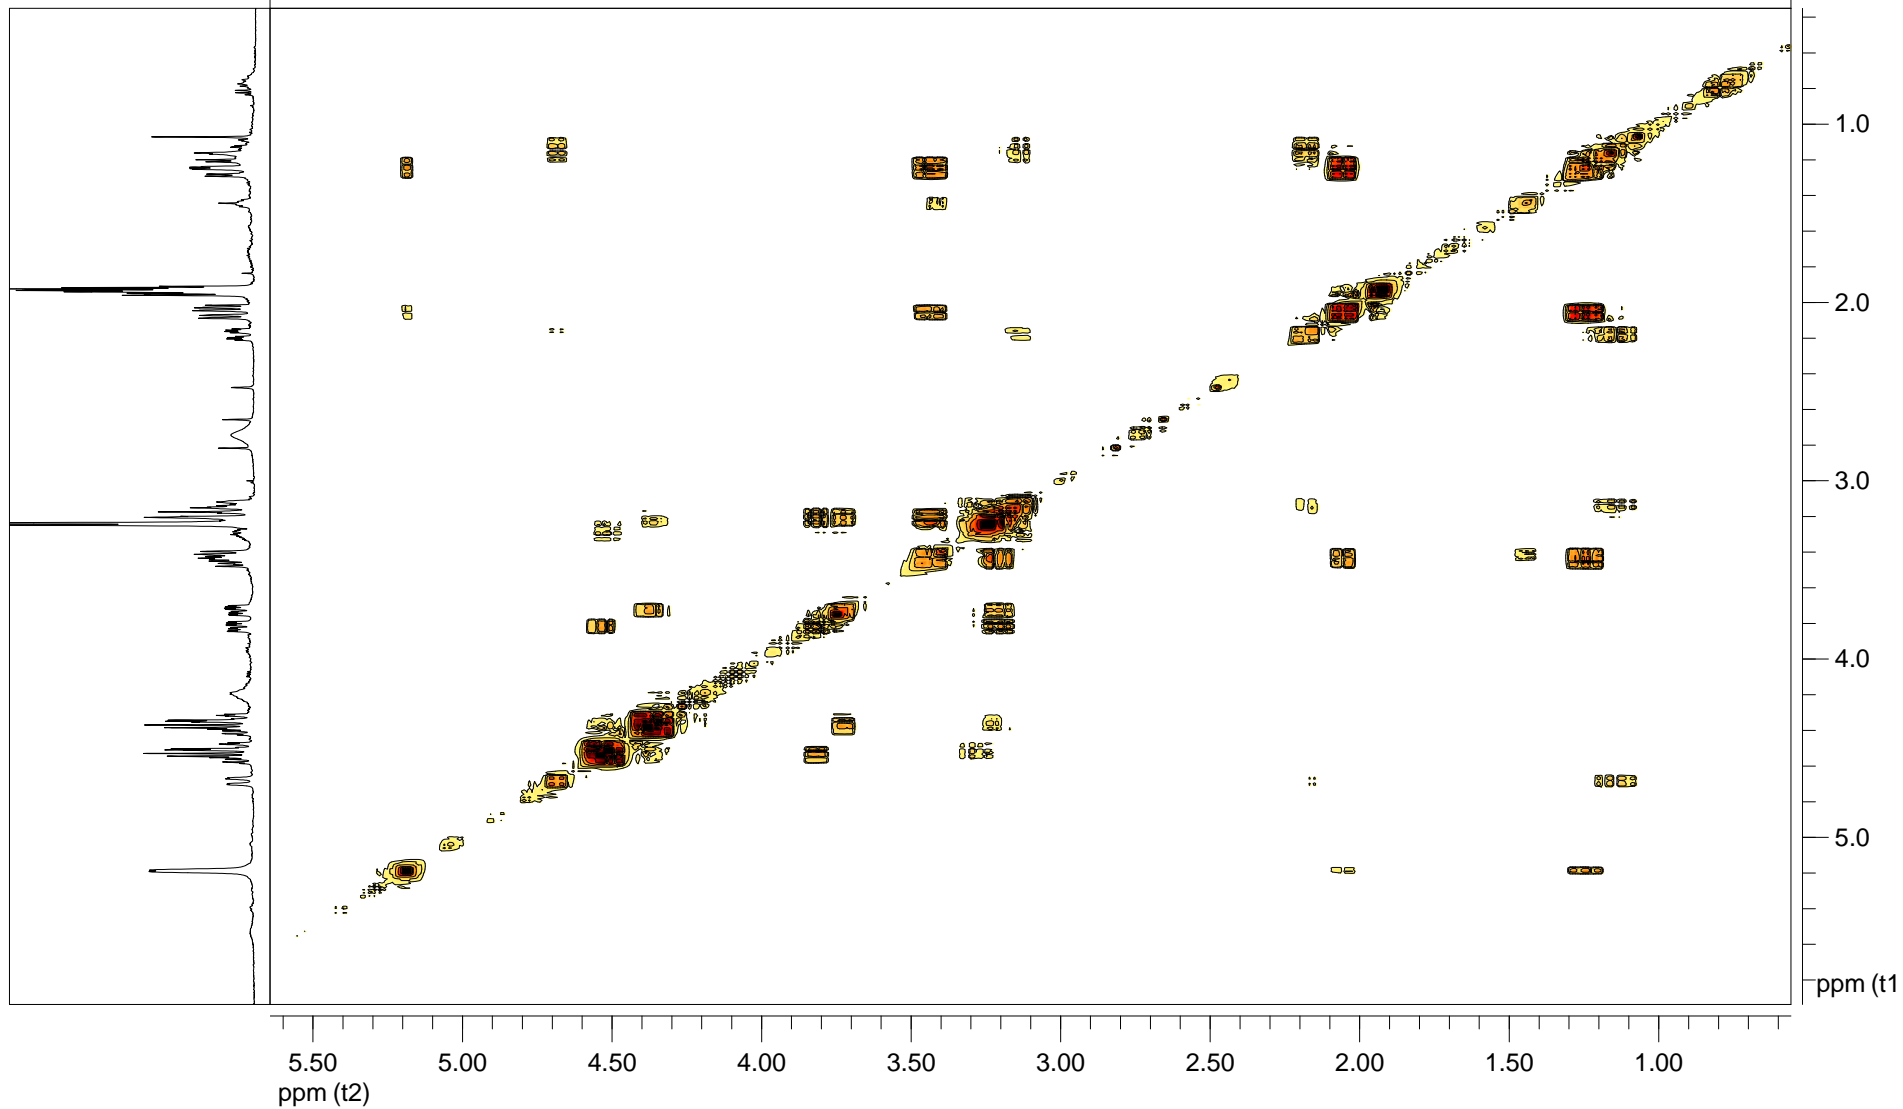

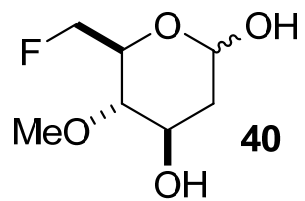

<sup>1</sup>H NMR Spectrum  
300 MHz, CDCl<sub>3</sub>

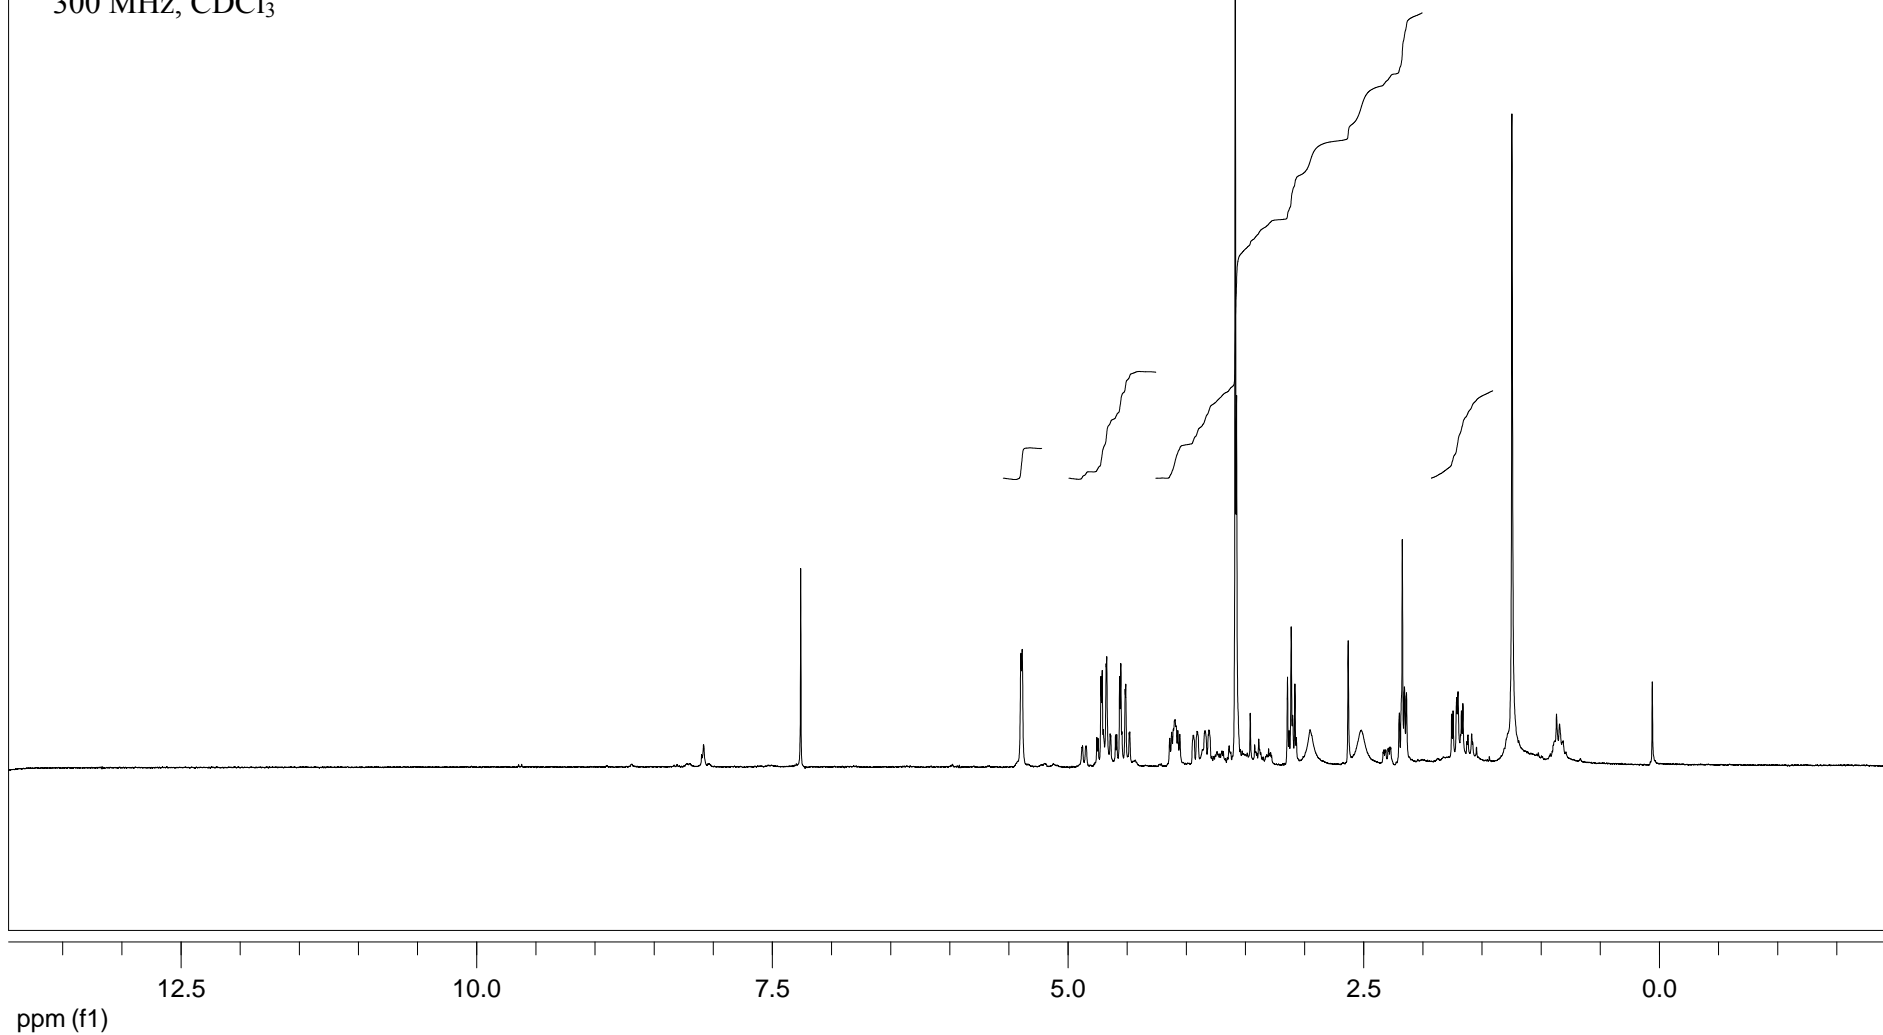

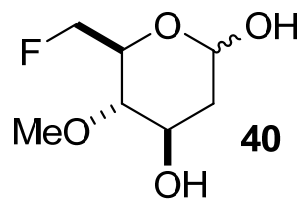

<sup>1</sup>H NMR Spectrum  
300 MHz, CDCl<sub>3</sub>

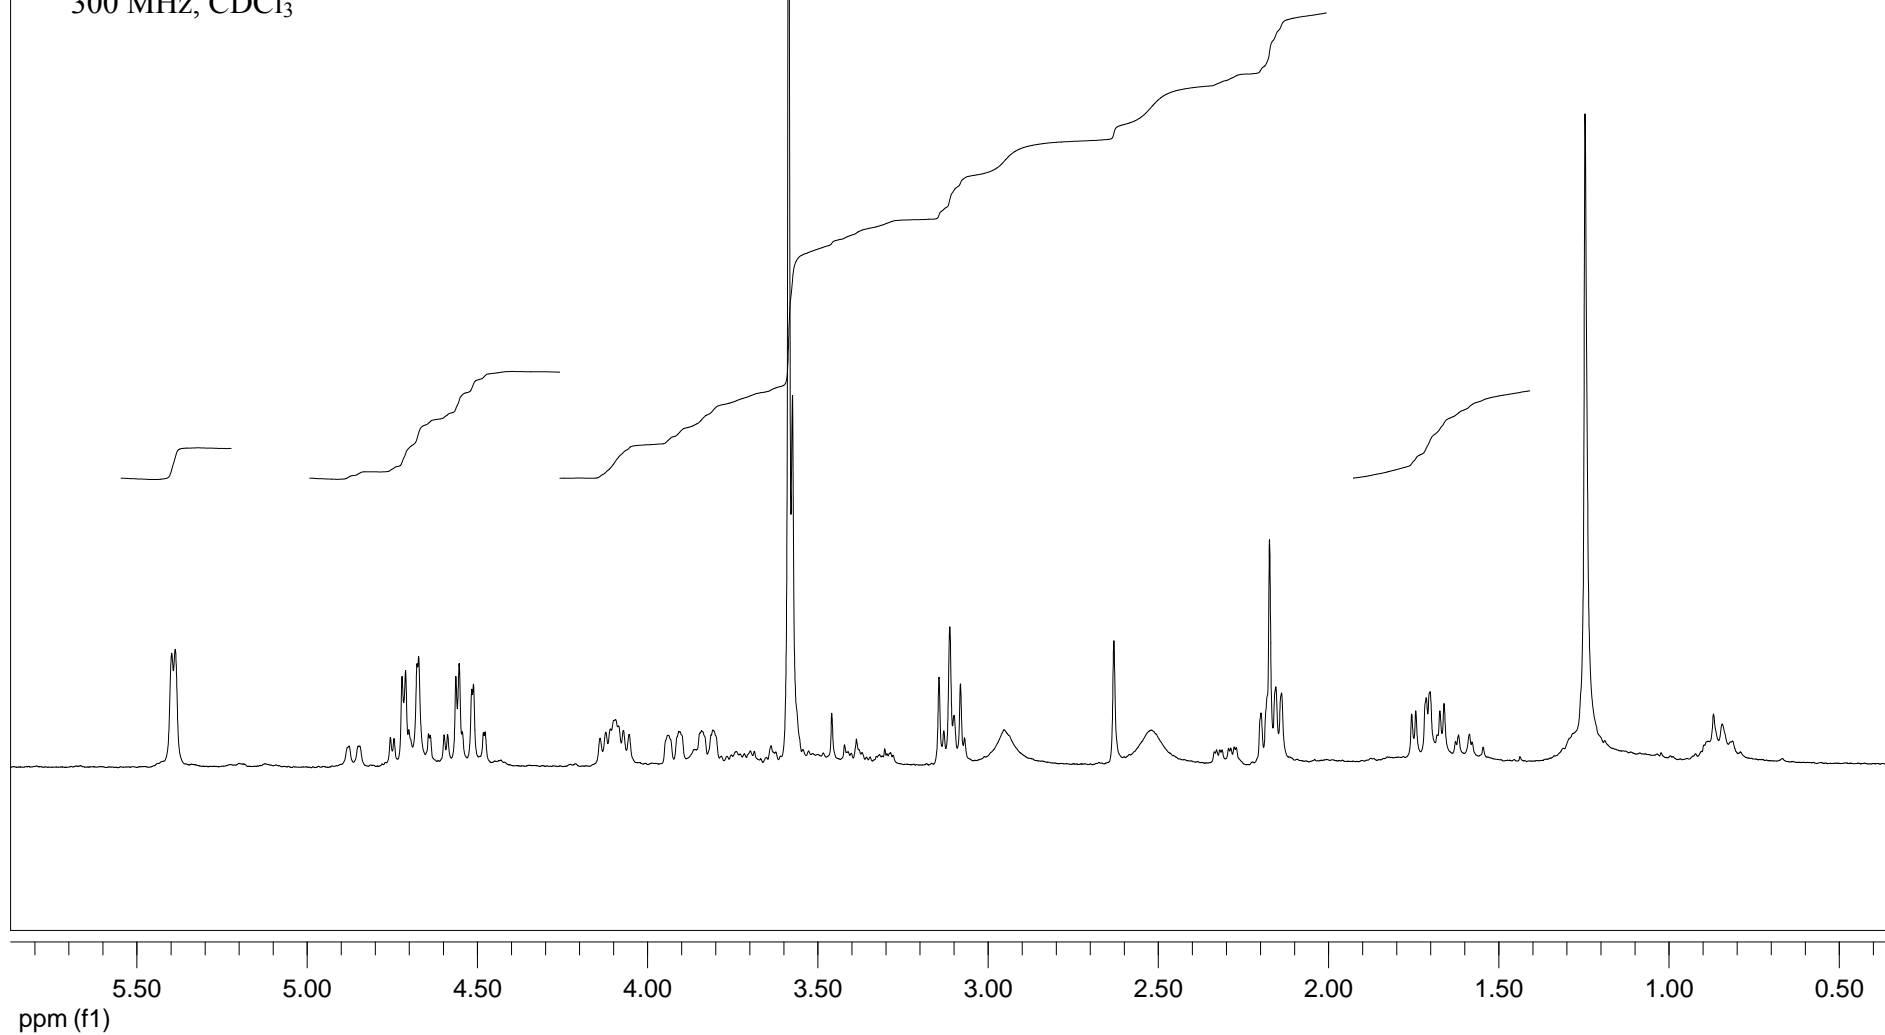

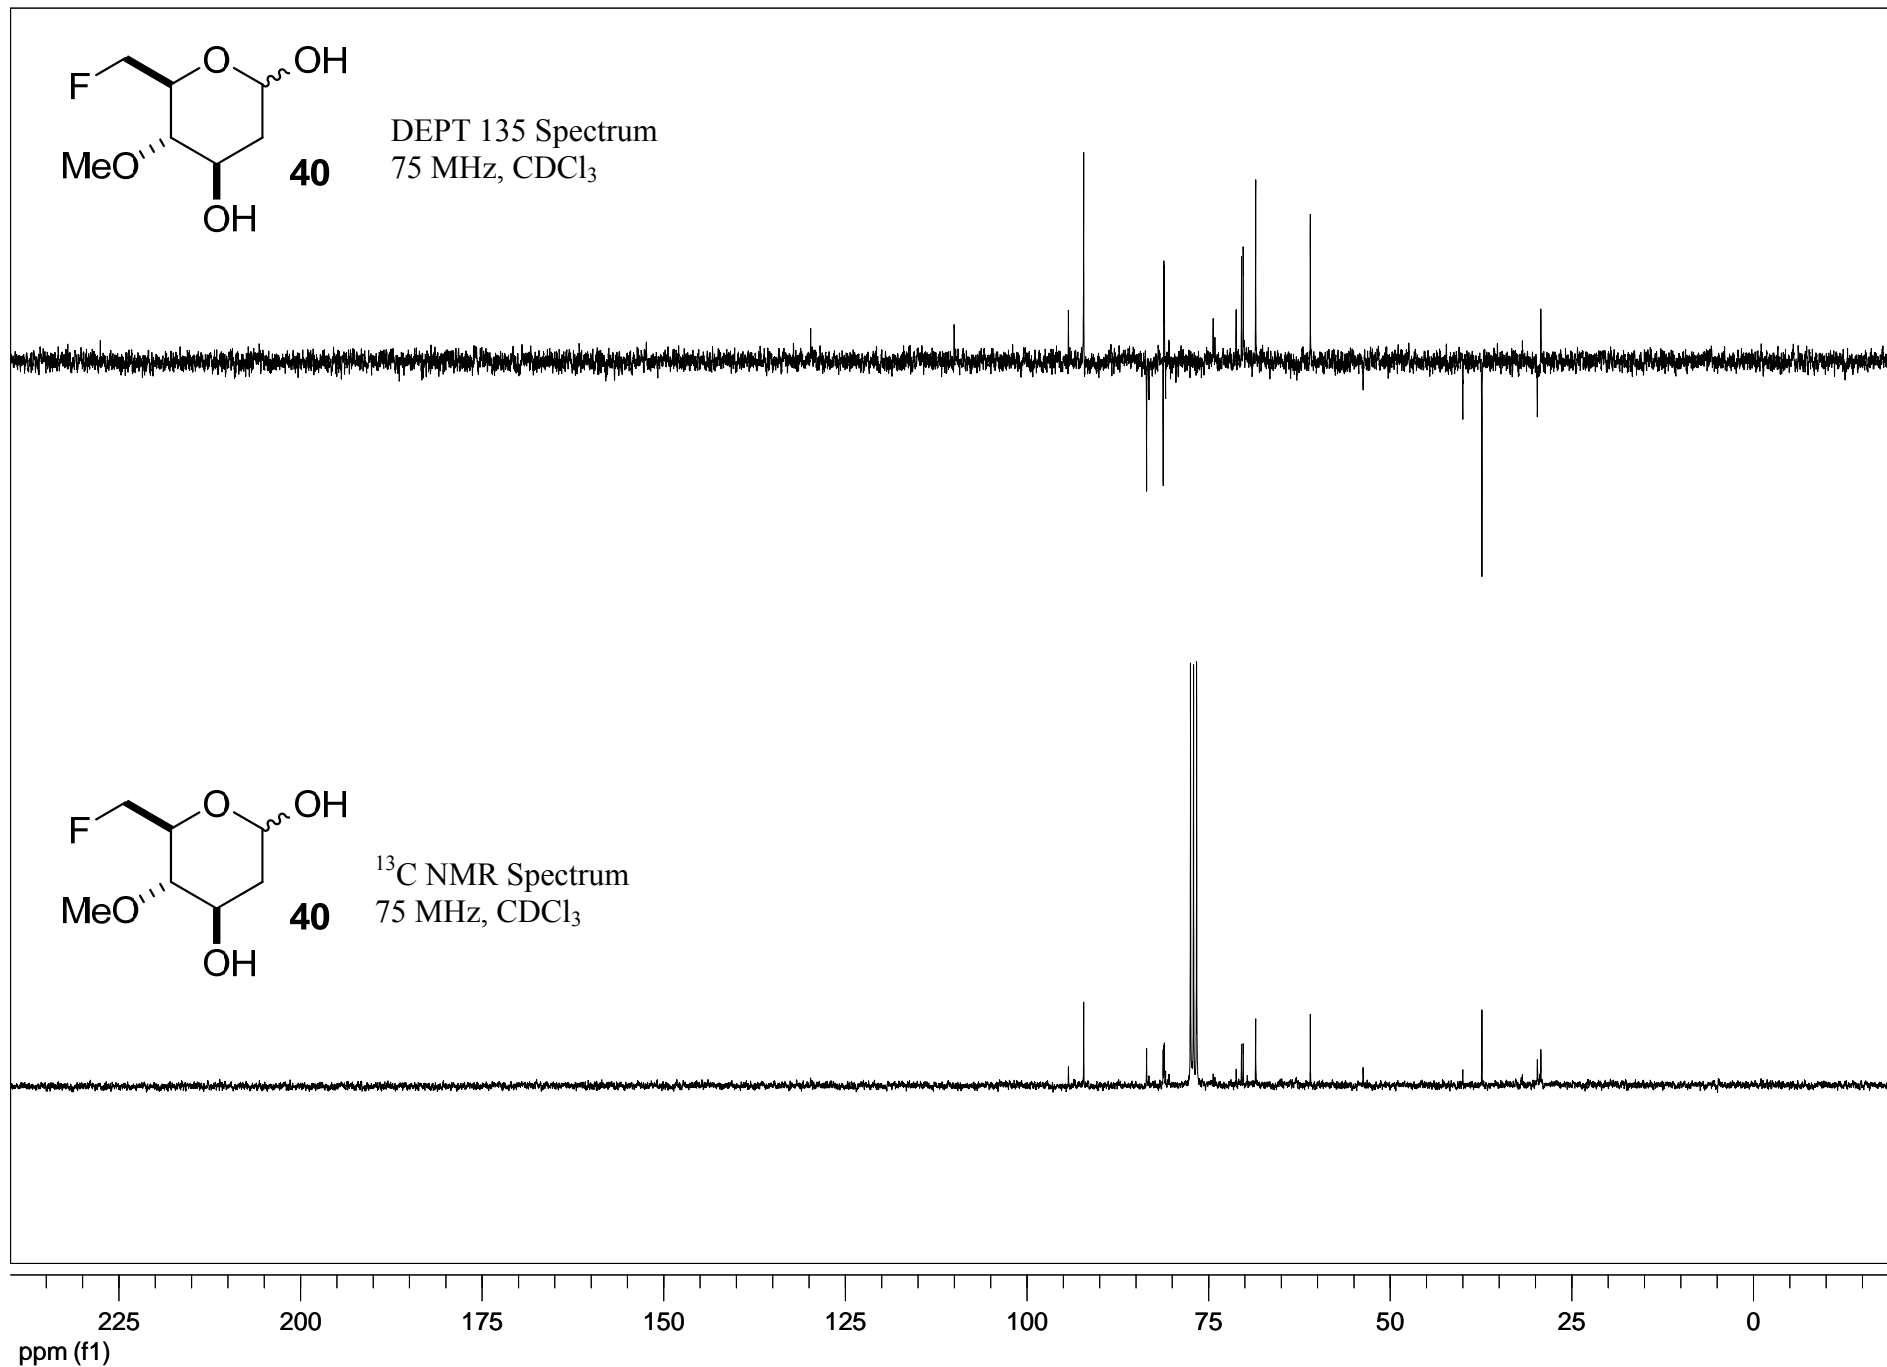

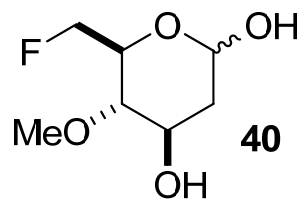

$^{19}\text{F}$  NMR Spectrum  
282 MHz,  $\text{CDCl}_3$

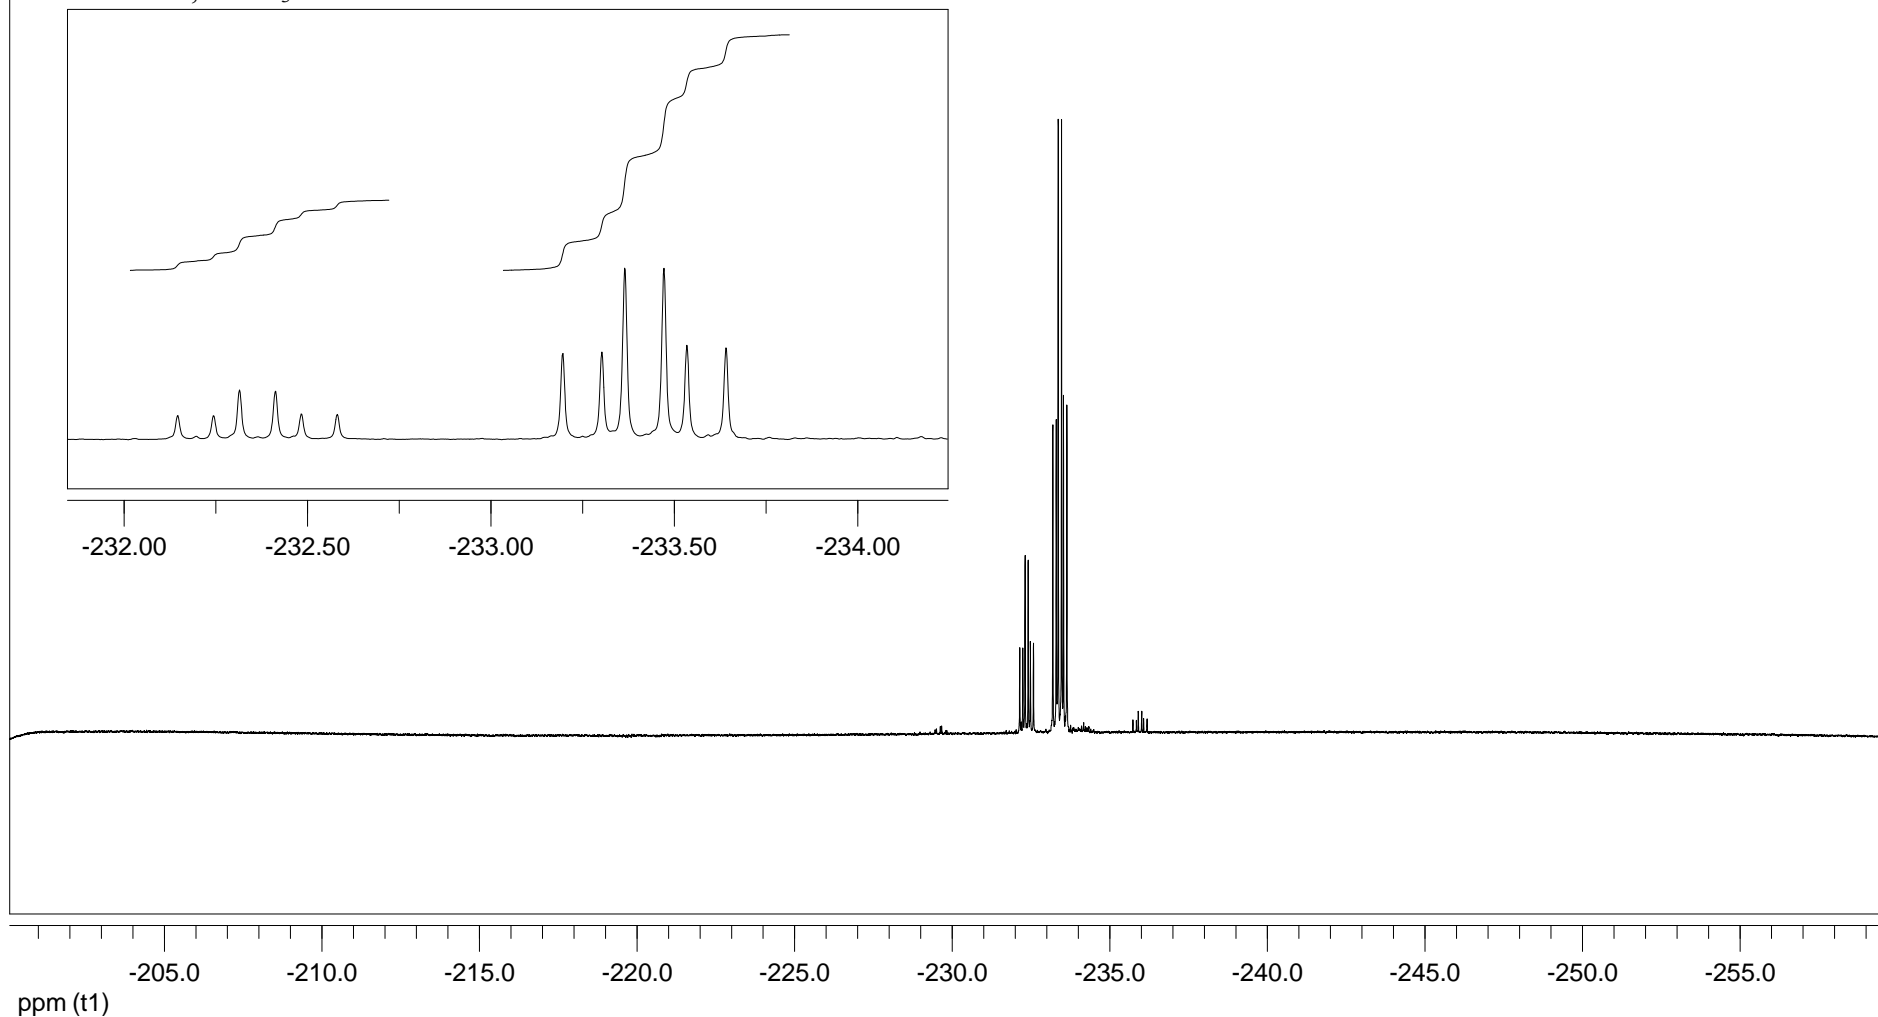

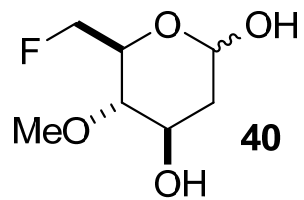

COSY Spectrum, 300 MHz, CDCl<sub>3</sub>

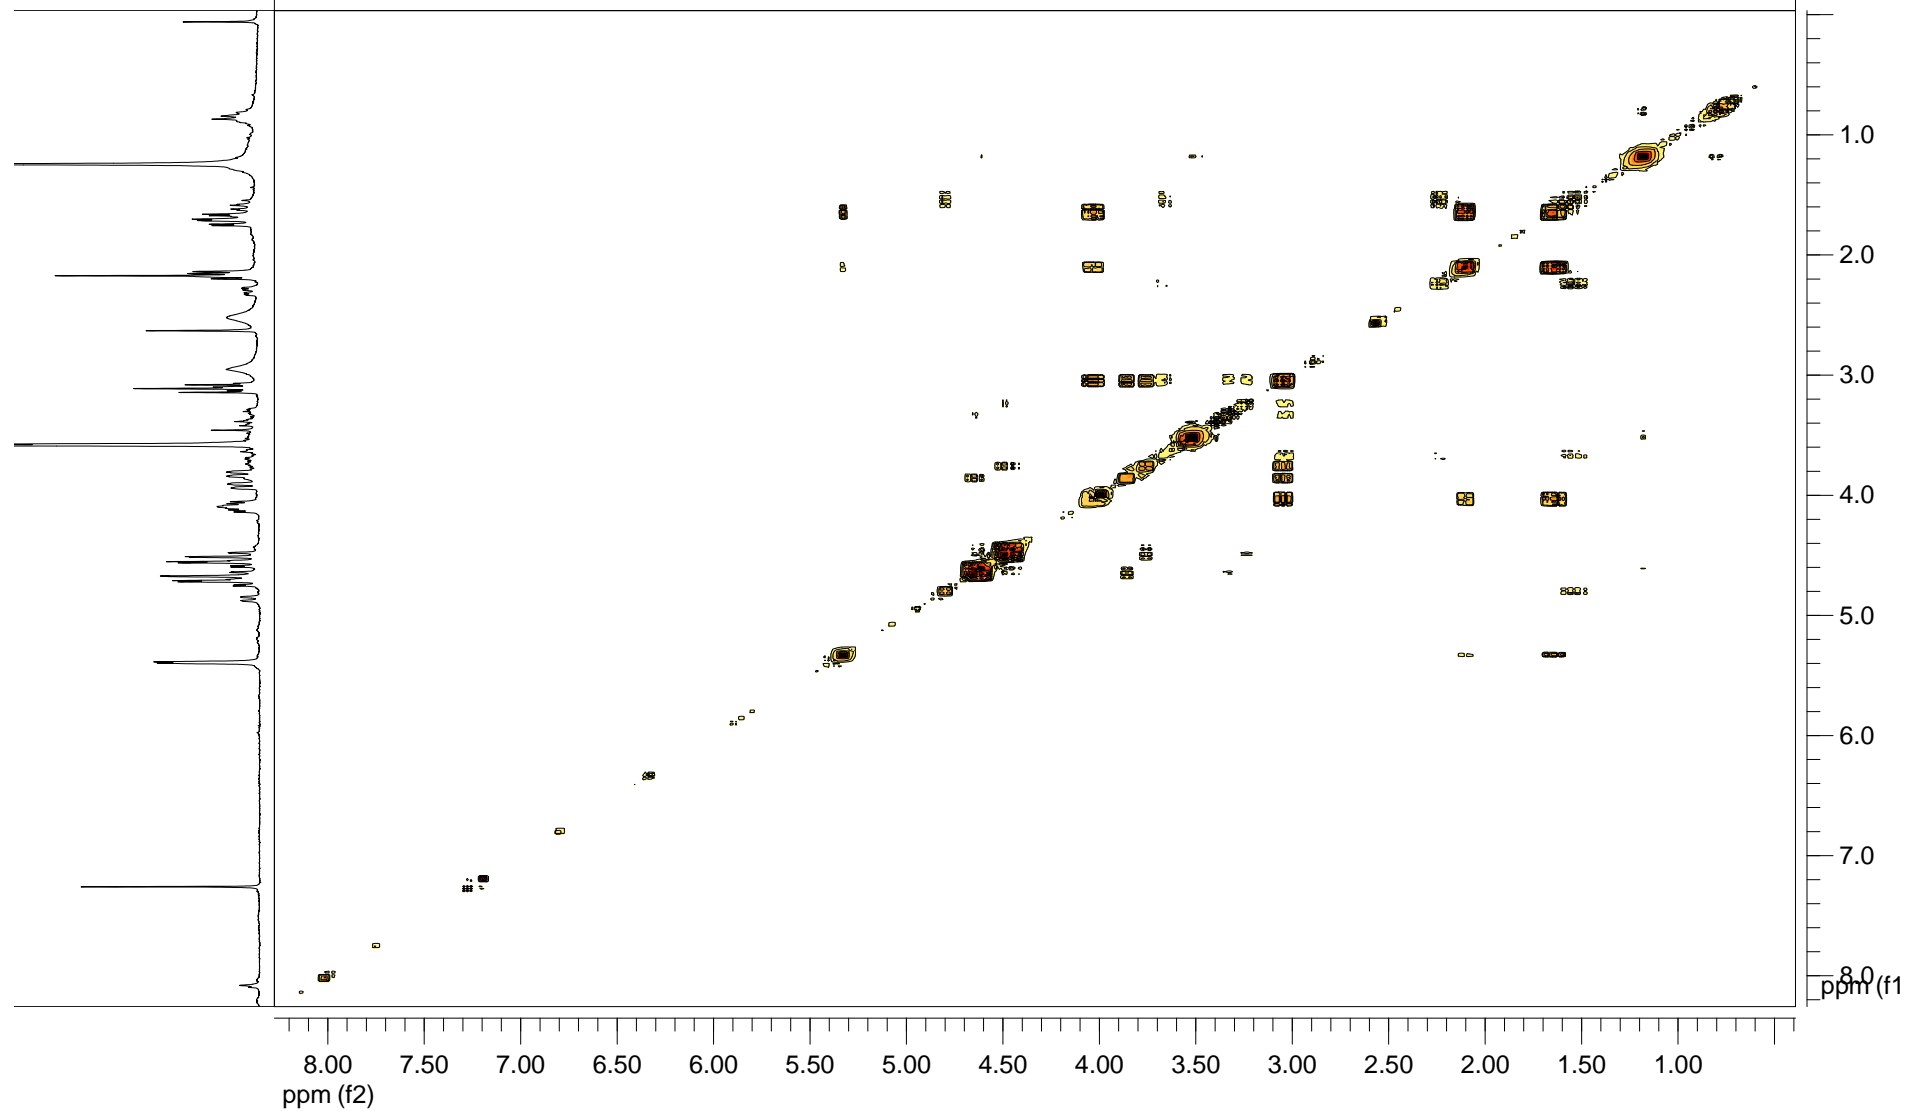

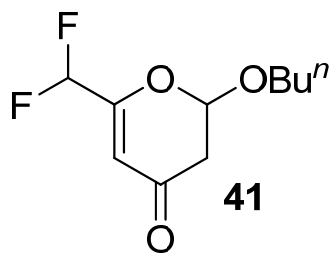

<sup>1</sup>H NMR Spectrum  
300 MHz, CDCl<sub>3</sub>

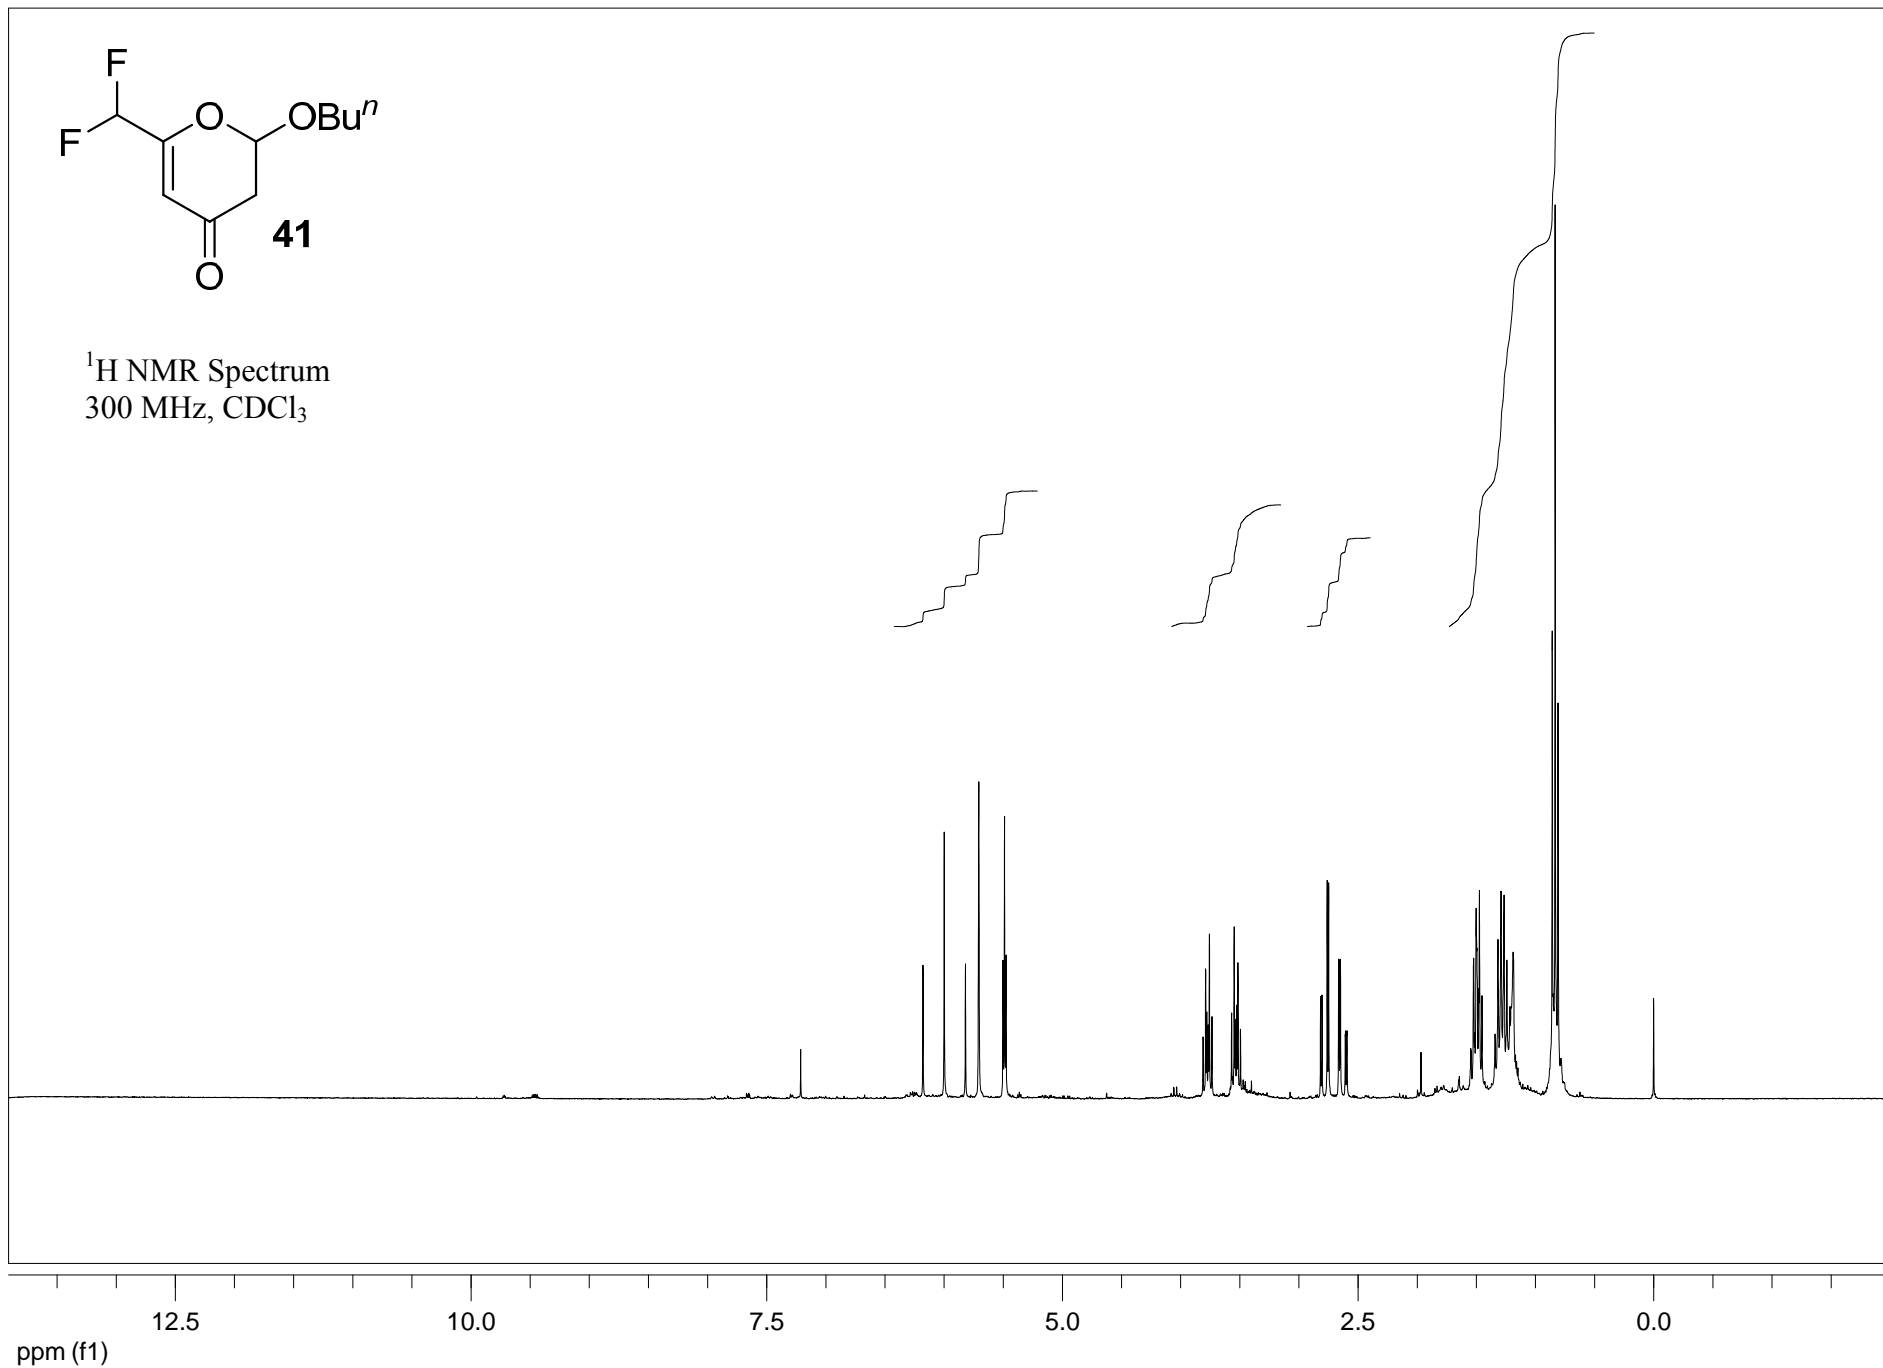



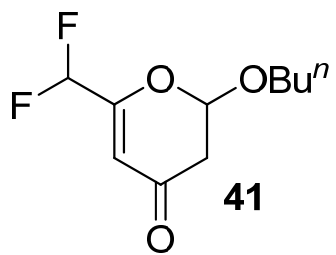

<sup>1</sup>H NMR Spectrum expansion  
300 MHz, CDCl<sub>3</sub>

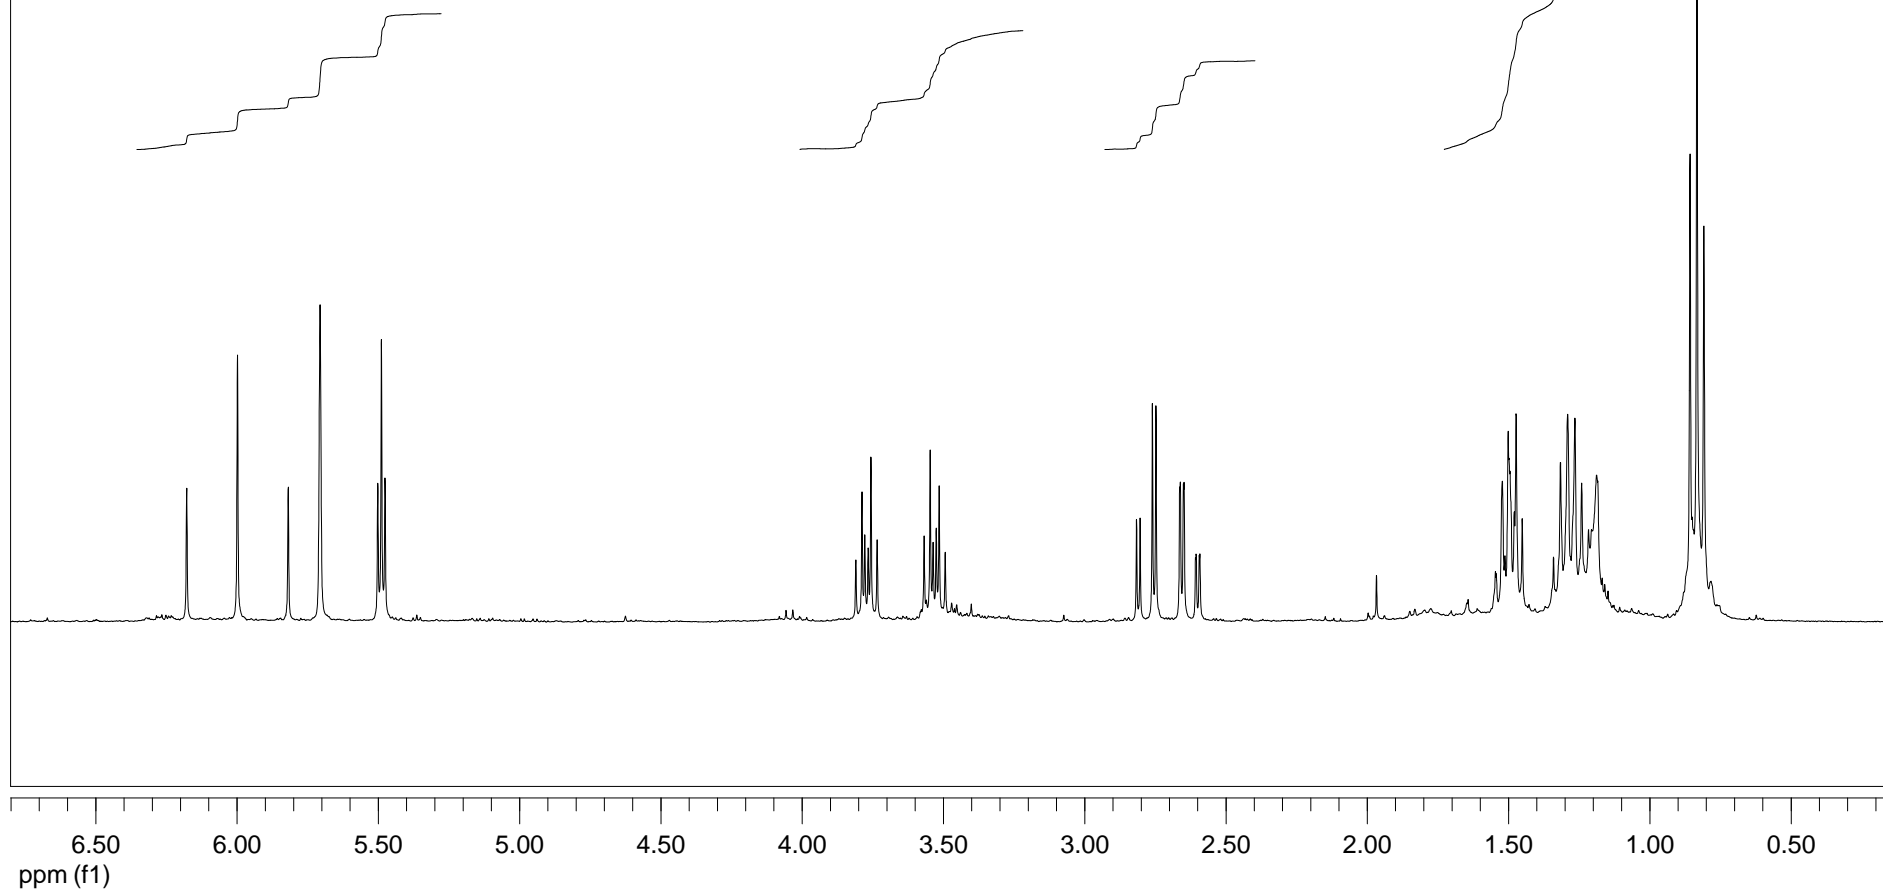

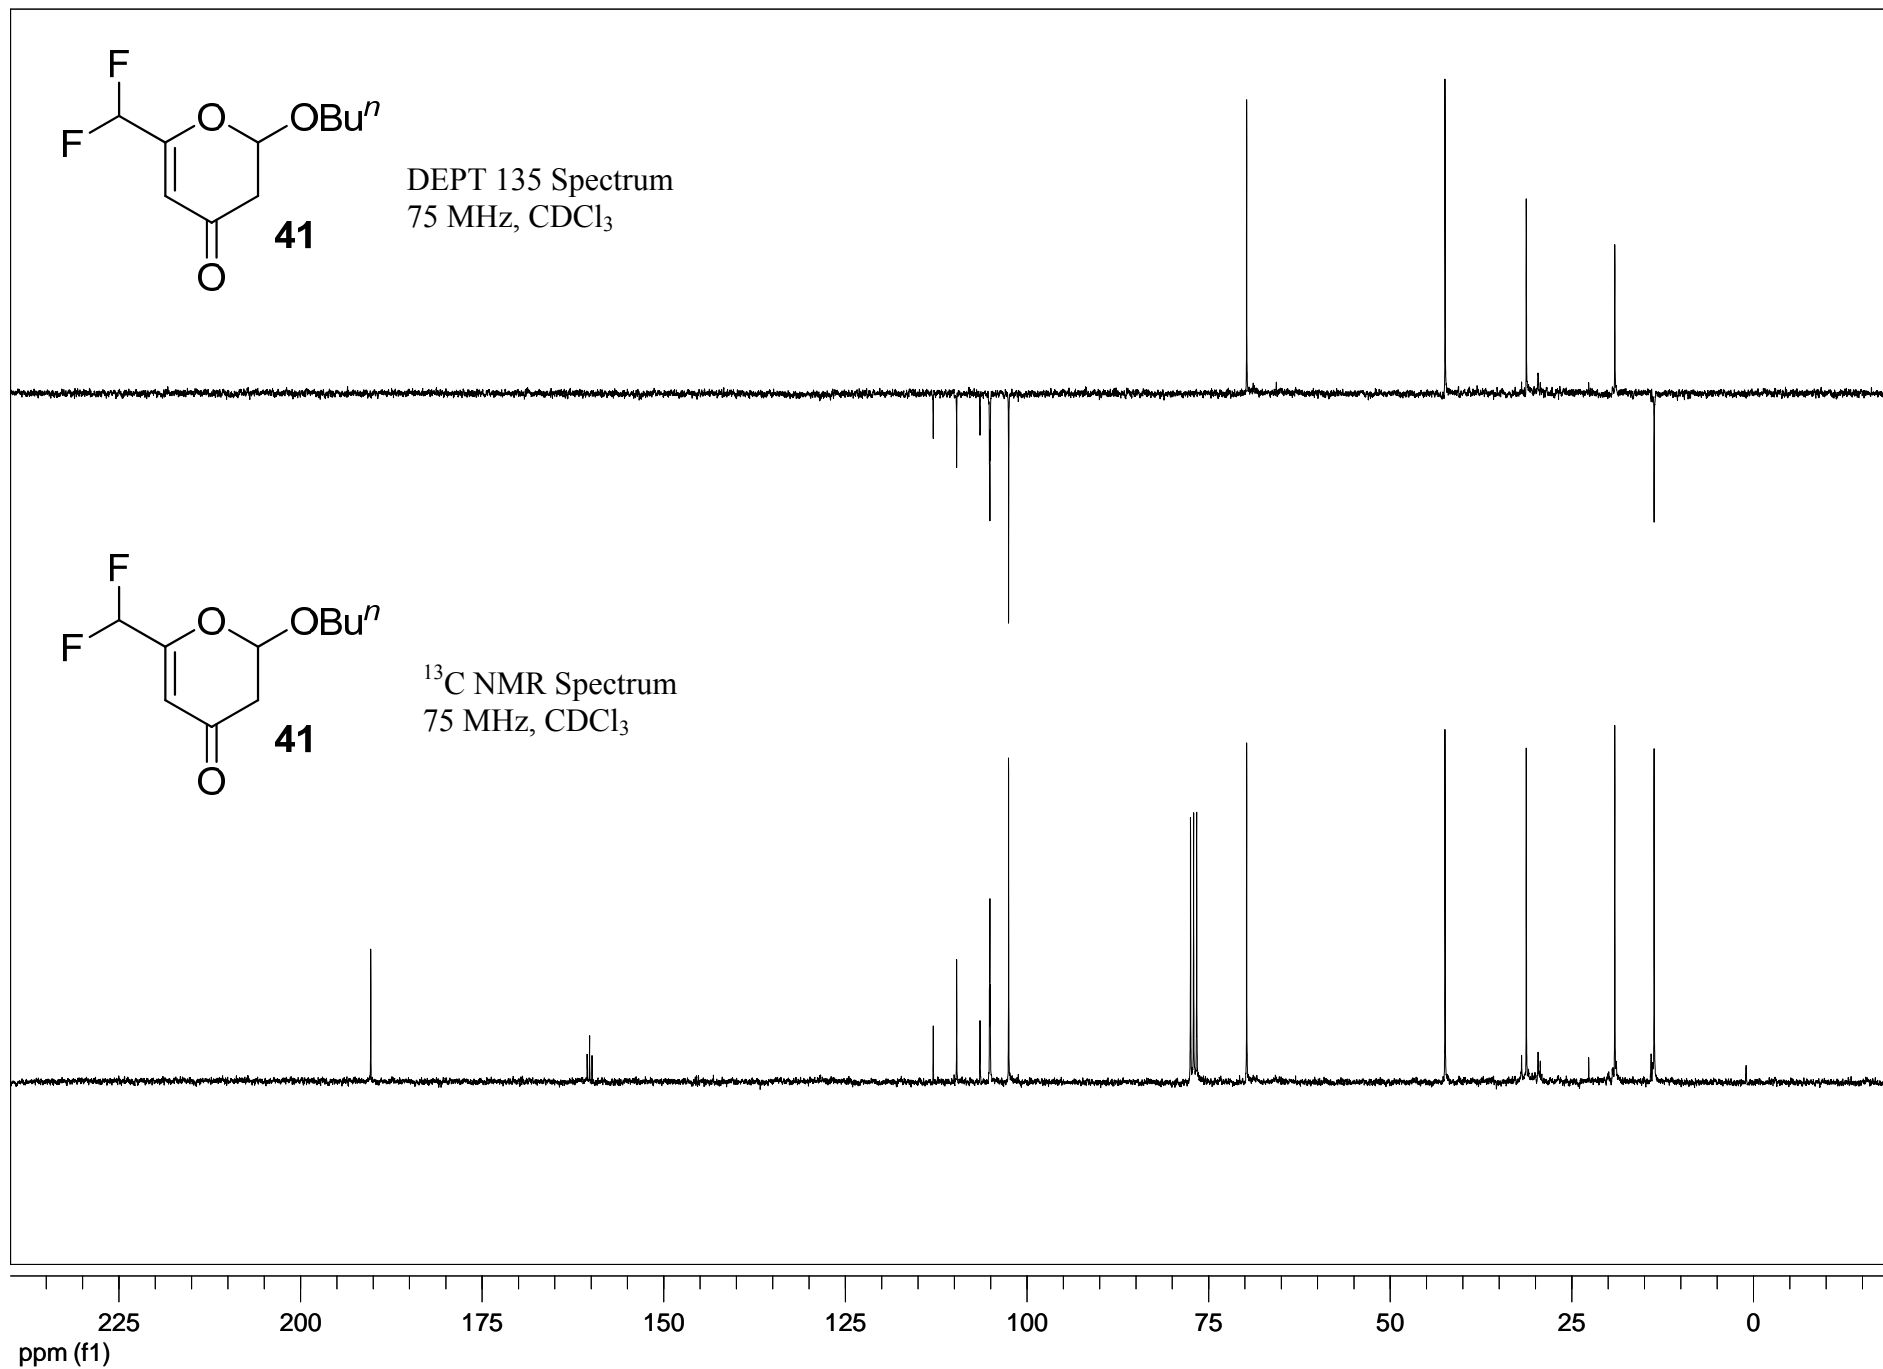

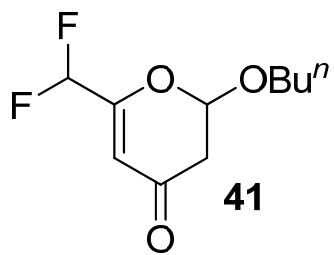

$^{19}\text{F}$  NMR Spectrum  
282 MHz,  $\text{CDCl}_3$

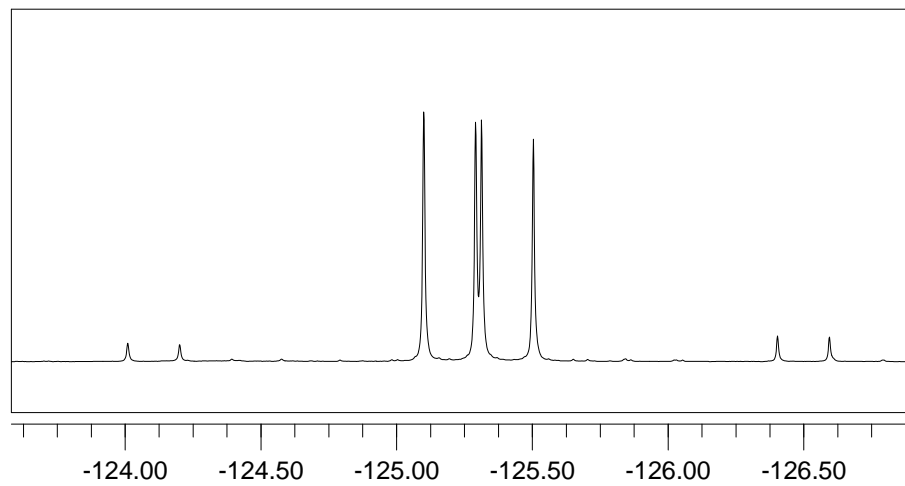

ppm (f1)  
-50

-75

-100

-125

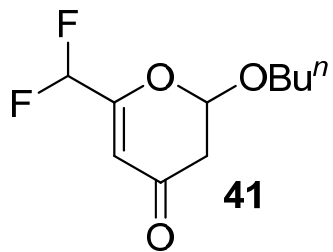

COSY Spectrum  
300 MHz, CDCl<sub>3</sub>

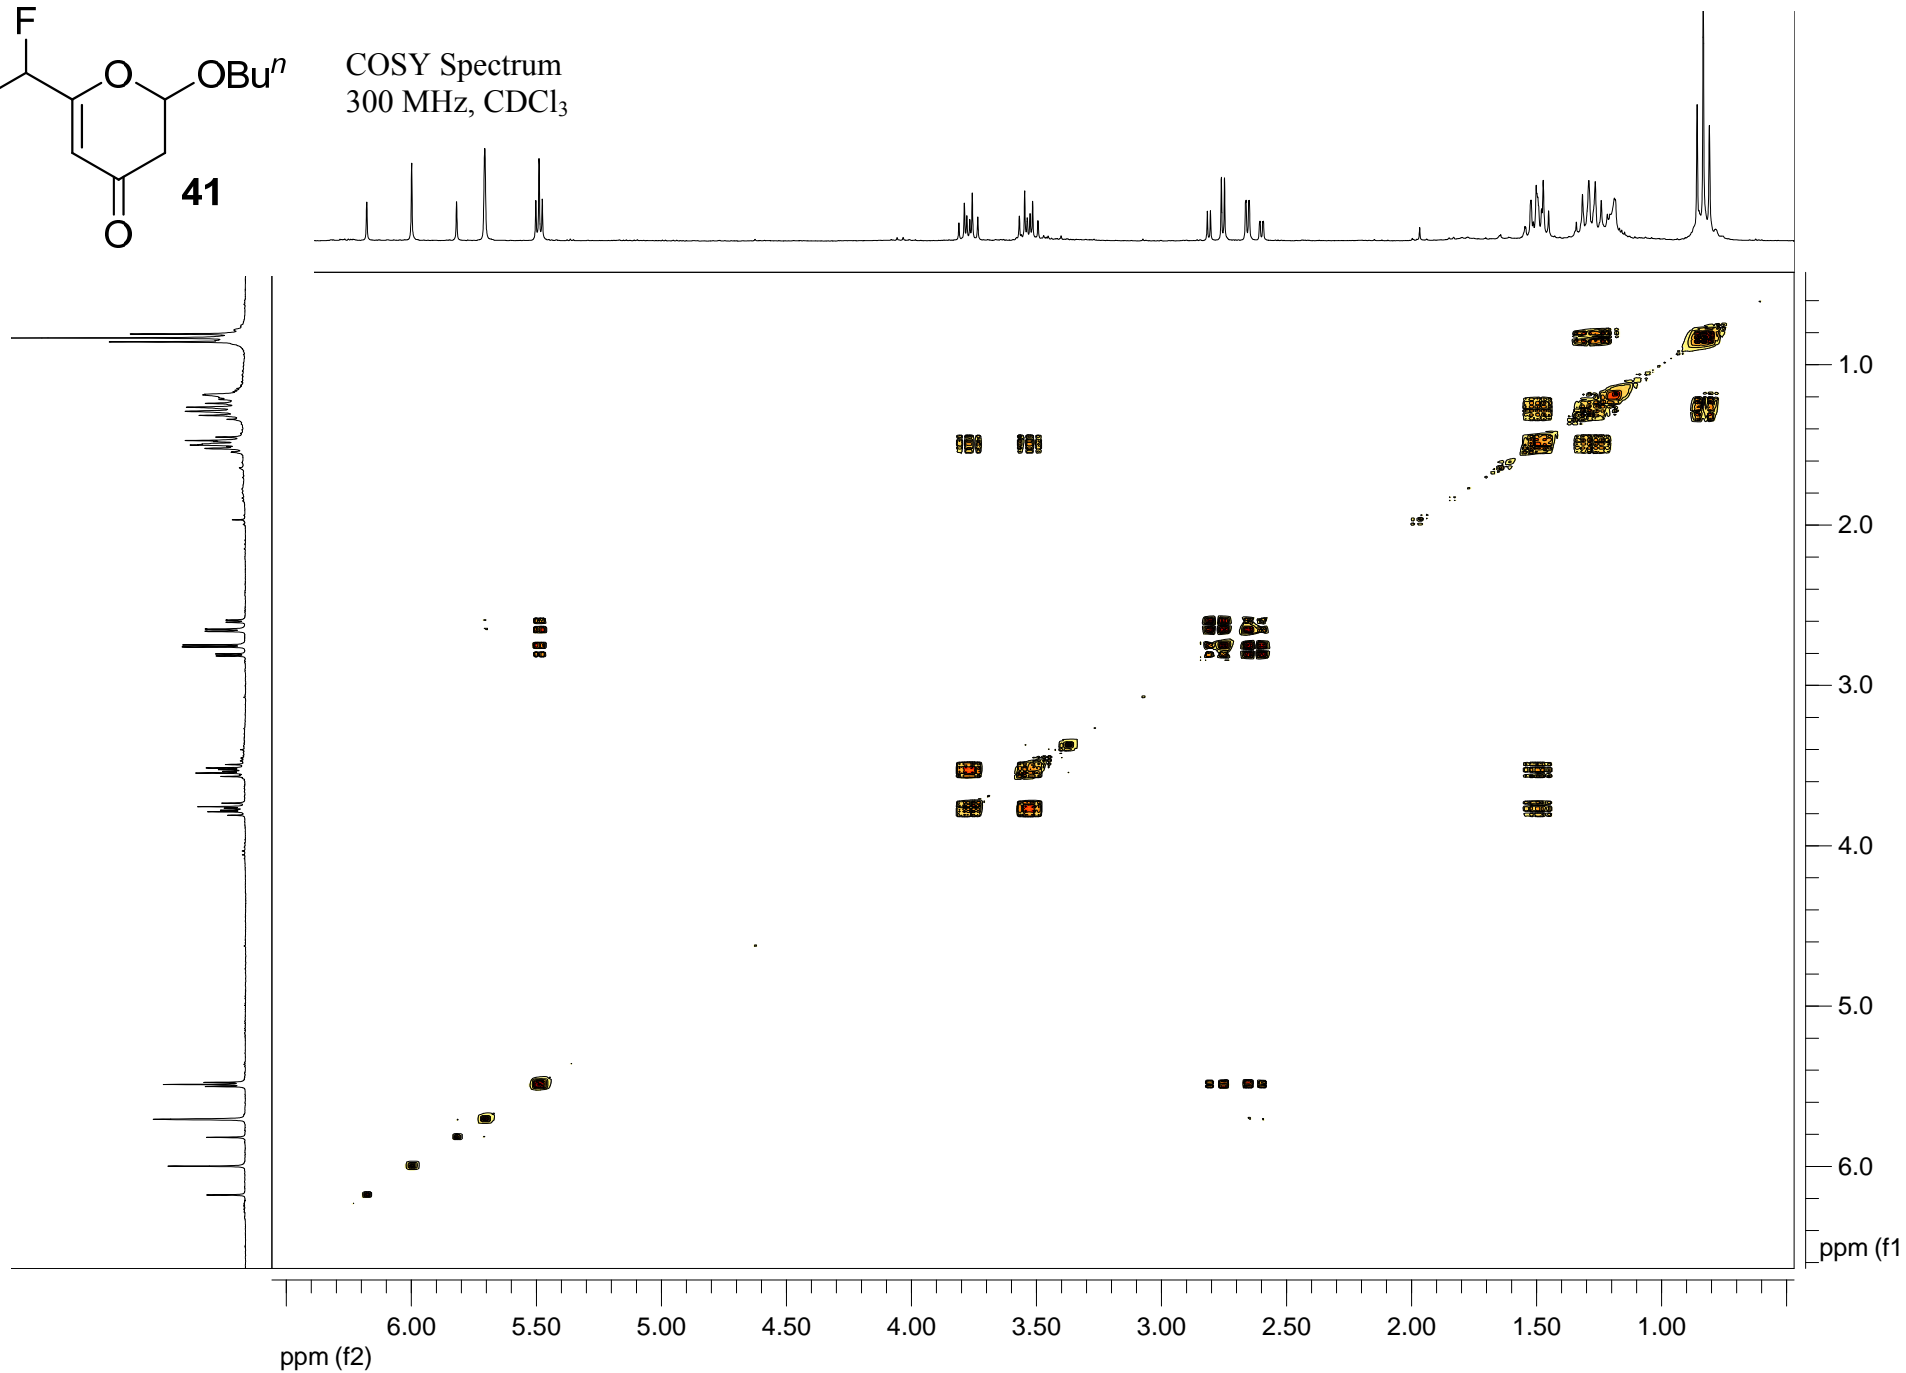

Supplement: b817672h.pdf [file b817672h.pdf]
